# Supplementary material for: Construction and validation of a novel prognostic signature of microRNAs in lung adenocarcinoma
Source: PeerJ. 2021 Jan 8;9:e10470. doi: 10.7717/peerj.10470 (PMC7798616; doi:10.7717/peerj.10470)
Supplement: Supplemental Information 8 [file peerj-09-10470-s008.xlsx]

## Sheet: miRNA_HiSeq_gene
sample	TCGA-NJ-A4YP-01	TCGA-86-8278-01	TCGA-62-A470-01	TCGA-44-6778-01	TCGA-49-AARQ-01	TCGA-97-A4M1-01	TCGA-99-8033-01	TCGA-44-3398-11	TCGA-78-7149-01	TCGA-50-6597-01	TCGA-69-8255-01	TCGA-69-8453-01	TCGA-97-8552-01	TCGA-53-A4EZ-01	TCGA-78-7162-01	TCGA-62-A46U-01	TCGA-MP-A4T8-01	TCGA-93-A4JN-01	TCGA-86-A4JF-01	TCGA-55-8096-01	TCGA-93-A4JQ-01	TCGA-86-6851-01	TCGA-62-8398-01	TCGA-J2-A4AG-01	TCGA-MP-A4TK-01	TCGA-55-8208-01	TCGA-MN-A4N5-01	TCGA-64-5775-01	TCGA-62-8394-01	TCGA-93-7348-11	TCGA-05-4405-01	TCGA-78-7163-11	TCGA-97-8176-01	TCGA-05-5428-01	TCGA-50-5931-01	TCGA-49-AAR4-01	TCGA-64-1679-01	TCGA-55-6984-01	TCGA-MN-A4N1-01	TCGA-91-6847-01	TCGA-86-8358-01	TCGA-49-AARO-01	TCGA-75-6206-01	TCGA-MP-A4TC-01	TCGA-49-6744-01	TCGA-55-6971-01	TCGA-05-4410-01	TCGA-86-7954-01	TCGA-55-7910-01
MIMAT0019868	NA	NA	NA	NA	NA	NA	0.2515	NA	NA	0.692803	NA	NA	NA	0.3234	NA	NA	NA	NA	NA	NA	0.2972	0.2969	NA	0.2172	NA	NA	NA	NA	0.1823	NA	0.1761	NA	NA	NA	0.4081	NA	NA	NA	NA	NA	NA	NA	0.1992	NA	NA	0.365462	NA	0.1988	NA
MIMAT0019869	NA	NA	NA	NA	NA	0.493416	NA	0.7525	NA	0.4967	NA	0.977235	0.1628	NA	0.6202	NA	NA	NA	NA	NA	NA	NA	NA	0.2172	0.1814	NA	NA	NA	NA	0.511986	0.1761	0.2888	NA	NA	NA	NA	0.3161	NA	NA	NA	NA	NA	NA	NA	NA	0.469271	0.3813	NA	NA
MIMAT0019860	NA	NA	NA	0.3516	NA	NA	0.2515	NA	NA	NA	1.8017	NA	NA	NA	NA	NA	NA	NA	NA	NA	NA	NA	NA	NA	NA	NA	NA	NA	NA	NA	NA	NA	NA	NA	0.408219	NA	NA	NA	NA	NA	0.815968	NA	NA	NA	NA	0.1324	NA	NA	NA
MIMAT0019861	NA	NA	NA	NA	NA	NA	NA	NA	NA	NA	NA	NA	NA	NA	NA	NA	NA	NA	NA	NA	NA	NA	NA	NA	NA	NA	NA	NA	NA	NA	NA	NA	NA	NA	0.2185	NA	NA	NA	NA	NA	NA	NA	NA	NA	NA	NA	NA	NA	NA
MIMAT0019862	NA	0.1532	NA	0.3516	0.903098	NA	0.2515	NA	NA	1.01961	NA	0.4037	NA	0.587415	0.6202	0.1981	0.3711	0.535746	NA	NA	NA	0.7531	NA	NA	0.3425	NA	NA	0.4456	NA	NA	0.1761	NA	0.4033	NA	NA	NA	NA	0.1601	NA	NA	0.131	0.3871	NA	NA	0.1979	0.3655	0.2032	0.669999	0.3976
MIMAT0019863	NA	NA	NA	NA	NA	NA	NA	NA	NA	NA	NA	NA	NA	NA	NA	NA	NA	NA	NA	NA	NA	NA	NA	NA	NA	NA	NA	NA	NA	NA	NA	NA	NA	NA	NA	NA	NA	NA	NA	NA	NA	NA	NA	NA	NA	NA	NA	NA	NA
MIMAT0019864	NA	NA	0.4622	NA	0.3674	0.2677	NA	1.2445	0.446	0.496664	0.46732	0.977235	0.1628	0.8106	NA	0.1981	NA	NA	0.2505	NA	0.2972	0.2969	0.2728	NA	NA	NA	NA	NA	0.1823	NA	NA	NA	0.4033	0.2141	0.408219	NA	0.3161	0.3042	NA	NA	0.251089	NA	0.1992	0.1808	NA	0.365462	NA	0.1988	0.3976
MIMAT0019865	NA	0.534125	0.4622	NA	0.659972	NA	0.651989	NA	0.786192	0.692803	NA	0.718783	0.44188	0.587415	NA	0.1981	NA	0.2926	0.8143	0.798033	1.10028	0.543004	0.2728	0.722349	0.739764	NA	0.817533	NA	0.489685	NA	0.1761	0.529319	NA	0.2141	0.2185	0.462664	NA	0.304195	0.557813	NA	0.251089	NA	1.02587	0.1808	0.66723	0.742211	NA	0.373494	NA
MIMAT0019866	NA	0.1532	NA	NA	0.3674	NA	NA	NA	0.7863	0.692834	0.2525	NA	NA	NA	NA	NA	NA	NA	NA	NA	NA	NA	NA	NA	NA	NA	NA	NA	0.1823	NA	NA	NA	NA	NA	NA	NA	NA	NA	NA	NA	NA	NA	NA	NA	NA	0.1324	NA	NA	NA
MIMAT0019867	NA	NA	0.4622	0.3516	0.3674	NA	NA	1.90257	NA	0.865439	0.968149	0.4037	0.3091	NA	0.6202	0.1981	NA	NA	NA	NA	NA	0.753181	NA	0.405938	NA	NA	0.2517	NA	NA	NA	0.1761	NA	NA	0.2141	NA	NA	NA	NA	0.3057	NA	0.560972	0.2065	NA	0.1808	NA	NA	NA	NA	0.3976
MIMAT0027483	0.3514	NA	NA	NA	0.3674	NA	0.2515	NA	NA	NA	NA	NA	NA	NA	NA	NA	NA	NA	NA	0.2445	NA	NA	NA	NA	NA	NA	NA	0.4456	NA	NA	0.1761	NA	NA	NA	NA	NA	NA	NA	NA	NA	NA	NA	NA	0.1808	NA	0.2536	NA	NA	NA
MIMAT0027482	NA	NA	NA	NA	NA	NA	NA	NA	NA	NA	0.2525	NA	NA	NA	NA	NA	NA	NA	NA	NA	NA	NA	NA	0.2172	NA	NA	NA	NA	NA	NA	NA	NA	NA	NA	NA	NA	NA	NA	NA	NA	0.131	NA	NA	NA	NA	NA	NA	NA	NA
MIMAT0027481	NA	NA	NA	NA	NA	NA	NA	NA	NA	NA	NA	NA	NA	NA	NA	NA	NA	NA	NA	NA	NA	0.2969	NA	NA	NA	NA	NA	NA	NA	NA	NA	NA	NA	NA	NA	NA	NA	NA	NA	NA	0.131	NA	NA	NA	NA	NA	NA	NA	NA
MIMAT0027480	NA	NA	NA	NA	NA	NA	NA	NA	NA	NA	NA	NA	NA	NA	NA	NA	NA	NA	NA	NA	NA	NA	NA	NA	NA	NA	NA	NA	NA	NA	NA	NA	NA	NA	NA	NA	NA	NA	NA	NA	NA	NA	NA	NA	NA	NA	NA	NA	NA
MIMAT0027487	NA	0.2916	NA	NA	NA	NA	0.2515	0.7525	NA	NA	NA	NA	0.1628	NA	NA	NA	NA	0.2926	NA	0.2445	NA	NA	NA	NA	NA	NA	NA	NA	NA	NA	NA	NA	NA	0.2141	NA	0.2498	NA	0.4352	0.3057	0.2701	NA	NA	0.1992	0.3415	NA	NA	NA	NA	NA
MIMAT0027486	NA	0.534194	NA	0.3516	0.903098	0.2677	0.651989	0.7525	NA	0.4967	0.4673	0.977235	0.1628	NA	NA	0.1981	NA	0.2926	0.463872	0.797949	0.2972	1.09924	0.2728	NA	0.1814	0.3397	NA	NA	0.1823	0.146	0.474542	NA	0.4033	NA	NA	0.2498	0.575236	1.03998	NA	NA	0.131	0.2065	0.374203	0.341444	NA	NA	0.2032	0.3735	NA
MIMAT0027485	NA	NA	NA	NA	NA	NA	NA	1.9025	NA	0.2696	NA	NA	NA	0.3234	NA	0.1981	NA	NA	NA	NA	NA	NA	NA	NA	NA	NA	NA	NA	0.1823	NA	NA	NA	NA	NA	NA	NA	NA	NA	NA	NA	NA	NA	NA	NA	NA	NA	NA	NA	NA
MIMAT0027484	NA	NA	NA	NA	NA	NA	NA	NA	NA	NA	NA	NA	NA	NA	NA	NA	NA	NA	NA	NA	NA	NA	NA	NA	NA	NA	NA	NA	NA	NA	NA	NA	NA	NA	NA	NA	NA	NA	NA	NA	0.131	NA	NA	NA	NA	NA	NA	NA	NA
MIMAT0027489	NA	NA	NA	NA	NA	NA	NA	NA	NA	NA	NA	NA	0.1628	0.3234	NA	NA	NA	NA	NA	NA	NA	NA	NA	NA	0.1814	NA	NA	NA	NA	NA	NA	NA	0.4033	0.2141	NA	NA	NA	0.1601	NA	NA	0.361945	NA	NA	NA	NA	NA	NA	NA	NA
MIMAT0027488	NA	NA	NA	0.3516	NA	NA	0.465597	NA	NA	NA	NA	NA	NA	NA	NA	0.1981	NA	NA	NA	0.2445	NA	NA	NA	NA	NA	NA	NA	NA	NA	NA	NA	NA	NA	NA	NA	NA	NA	NA	0.3057	NA	0.131	NA	NA	NA	NA	NA	NA	NA	NA
MIMAT0030979	NA	NA	NA	NA	NA	NA	NA	NA	NA	NA	NA	NA	NA	NA	NA	NA	NA	NA	NA	NA	NA	NA	NA	NA	NA	NA	NA	NA	NA	NA	NA	NA	NA	NA	NA	NA	NA	NA	NA	NA	NA	NA	NA	NA	NA	NA	NA	NA	NA
MIMAT0027551	NA	NA	NA	NA	NA	NA	NA	NA	NA	NA	NA	0.4037	0.309078	NA	NA	NA	NA	NA	NA	NA	NA	NA	0.2728	NA	NA	NA	NA	NA	NA	NA	NA	NA	NA	NA	0.4081	NA	NA	0.1601	0.3057	NA	NA	NA	NA	NA	NA	0.1324	NA	NA	NA
MIMAT0027550	NA	NA	NA	NA	NA	NA	0.2515	NA	NA	NA	NA	NA	0.1628	NA	NA	NA	NA	NA	NA	NA	NA	NA	NA	0.2172	NA	NA	NA	NA	NA	NA	NA	NA	NA	NA	NA	NA	NA	NA	NA	NA	NA	NA	NA	NA	NA	NA	NA	NA	NA
MIMAT0027553	NA	NA	NA	NA	1.29278	NA	NA	NA	NA	NA	NA	NA	NA	NA	NA	NA	NA	NA	NA	NA	NA	NA	NA	NA	NA	NA	0.2517	0.4456	NA	NA	NA	NA	NA	NA	NA	NA	0.3161	NA	0.3057	NA	NA	0.2065	NA	NA	0.1979	0.365462	NA	NA	NA
MIMAT0027552	NA	NA	NA	NA	NA	NA	0.2515	NA	NA	NA	NA	NA	NA	NA	NA	NA	NA	NA	NA	NA	NA	NA	NA	NA	0.1814	NA	NA	NA	NA	NA	NA	NA	NA	NA	NA	NA	NA	NA	NA	NA	NA	NA	NA	NA	NA	NA	NA	NA	0.3976
MIMAT0027555	NA	NA	NA	NA	NA	NA	0.2515	NA	NA	NA	NA	NA	NA	NA	NA	NA	NA	0.2926	NA	0.2445	NA	1.0992	NA	NA	NA	NA	NA	NA	0.1823	NA	NA	NA	NA	NA	NA	NA	NA	0.1601	NA	NA	NA	NA	NA	NA	NA	0.3655	0.2032	NA	NA
MIMAT0027554	NA	0.291682	NA	NA	NA	NA	NA	NA	NA	0.2696	NA	NA	NA	NA	NA	NA	NA	NA	NA	NA	NA	NA	NA	NA	NA	NA	NA	NA	NA	NA	NA	NA	NA	NA	NA	NA	NA	0.1601	NA	NA	NA	NA	NA	NA	0.1979	0.1324	NA	NA	NA
MIMAT0027557	NA	NA	NA	NA	NA	NA	NA	NA	NA	NA	NA	NA	NA	NA	NA	NA	NA	NA	NA	NA	NA	NA	NA	NA	NA	NA	NA	NA	NA	NA	NA	NA	NA	NA	NA	NA	NA	NA	NA	NA	NA	NA	0.1992	NA	NA	NA	NA	NA	NA
MIMAT0027556	NA	NA	NA	NA	NA	NA	NA	NA	NA	NA	NA	NA	NA	NA	NA	NA	NA	NA	NA	NA	NA	NA	NA	NA	NA	NA	NA	NA	NA	NA	NA	NA	NA	NA	NA	NA	NA	NA	NA	NA	NA	NA	NA	NA	NA	NA	NA	NA	NA
MIMAT0000765	2.82122	1.08407	4.56415	4.20041	2.99276	4.13075	2.74702	0.7525	4.25662	2.79883	2.53138	3.07483	3.2454	4.15685	4.2269	2.31461	2.77975	3.03467	3.25291	2.7885	3.01654	3.78594	2.72692	3.2399	3.33779	3.32575	2.9747	4.88697	3.57437	4.87972	3.31572	4.50569	3.69296	5.26463	3.53936	2.69639	1.15365	3.36048	3.62376	5.81741	3.65502	3.17018	3.98203	2.57054	3.51558	4.548	3.33272	2.55492	4.07614
MIMAT0000764	5.3765	4.34085	5.55663	4.7663	6.90222	5.57584	5.77362	7.3081	3.56912	5.20782	5.13885	6.02791	6.05742	5.71478	4.55822	4.45313	4.95062	5.26007	4.79371	7.11636	5.98774	4.96147	3.96086	4.77175	6.02929	6.17823	5.35159	4.59456	6.66533	2.17472	4.68896	3.09333	6.06161	5.22197	5.5068	5.18382	3.55802	4.95614	7.38684	5.89935	4.24539	5.22763	4.24112	6.17858	3.31711	4.60609	4.67255	4.41896	3.55945
MIMAT0000761	4.5784	3.69866	5.91366	2.87707	5.89673	4.86495	5.03579	5.83646	4.83464	3.94329	4.74513	5.11174	5.05056	6.06276	3.6182	4.25604	4.3269	4.93913	4.51137	6.08415	4.65823	5.50211	4.39124	4.99391	6.19936	5.04979	4.75051	5.56438	5.70207	1.74132	3.00178	2.44151	4.59816	3.31627	5.0954	4.92123	3.06152	5.22412	5.72559	6.10321	4.5795	4.36053	4.41136	5.41022	2.78238	4.86112	2.99231	4.72333	3.35088
MIMAT0000760	4.54466	5.60951	5.46094	5.75433	5.95188	4.25919	5.93498	6.10394	5.28692	5.28588	5.07481	6.08387	4.73172	6.17738	4.05112	4.83433	5.13055	5.07044	4.84224	7.27784	5.26755	6.71982	5.76818	5.00856	5.44201	6.85412	4.27019	4.14132	6.23583	2.14028	5.21792	3.64657	5.69923	3.81978	5.45934	5.91545	5.00493	5.60421	5.45772	6.69985	5.49833	5.80166	6.10112	4.62251	3.67351	5.54681	4.53815	5.94794	6.17158
MIMAT0000763	11.4859	7.03005	11.168	9.34735	7.78483	10.9482	11.1073	4.51785	9.91395	6.36762	8.53696	10.7492	9.69636	7.96752	9.25164	7.67666	7.8481	9.44841	9.96866	6.99002	8.69412	10.1685	10.2087	10.5383	8.30495	9.03272	9.26946	7.82997	9.26141	8.96892	9.37578	9.65161	10.602	10.4709	7.14562	7.97208	8.36619	10.7003	7.47369	7.13134	7.76388	7.77102	10.805	8.66758	7.10541	10.6844	6.58019	7.53002	7.64138
MIMAT0000762	3.48598	4.16283	4.46896	4.30473	5.64411	4.11385	4.26924	6.52448	4.90608	4.40166	5.53968	4.98507	4.45352	5.42524	4.65368	3.8027	4.04866	4.04557	4.29152	4.8429	3.55489	5.11201	4.3623	3.91965	4.89103	4.65302	3.91672	5.18838	5.39075	3.11593	3.75082	2.80394	4.84475	3.80335	4.60749	4.09318	4.23889	4.06393	4.90812	5.09393	5.21789	3.70066	4.07369	4.19827	3.73848	4.49368	4.0902	4.81711	3.96327
MIMAT0004958	0.6337	0.641571	2.36559	0.634082	2.4957	1.01404	0.965126	NA	0.446	0.692803	0.8196	0.4037	1.05341	1.59	NA	1.30571	0.9108	1.0869	1.43648	2.33983	1.81413	1.6117	0.873935	0.2172	2.60672	1.37464	0.465942	2.31639	3.07202	NA	0.603369	NA	0.7181	1.76557	3.2727	0.812412	0.3161	0.865132	2.92744	2.924	3.41899	1.15766	0.530163	1.45199	0.371899	0.742206	0.2032	1.98375	NA
MIMAT0002891	1.5512	0.291682	2.81592	0.634082	2.06693	0.86047	1.87433	3.20418	2.20879	1.28588	3.23487	1.55444	0.5635	1.58993	NA	1.38914	2.58193	1.48475	0.814349	1.0758	1.90508	1.98921	2.04355	0.981693	1.3828	1.86987	1.22291	1.82097	2.64477	0.2786	1.20049	0.915694	2.28398	0.713711	2.47967	1.43366	NA	1.88715	1.64331	3.30075	1.33398	0.823266	0.374203	1.37977	0.912208	1.16959	0.812522	1.30891	1.68765
MIMAT0002890	2.01209	1.08402	0.4622	2.10814	1.73115	0.688622	1.87427	3.65982	NA	0.4967	NA	1.38647	0.779709	1.00368	1.65464	NA	1.3027	1.23204	1.86979	2.66792	1.5009	0.543004	1.0292	0.981718	1.87955	1.76111	0.2517	1.49027	1.14568	0.278573	1.49435	0.735411	1.55343	0.713711	1.64398	1.70857	1.15365	1.52488	1.27262	1.2877	1.03258	1.58515	0.799193	2.86305	1.21594	0.566091	0.3813	1.02454	1.53807
MIMAT0019048	NA	NA	NA	NA	NA	NA	NA	NA	NA	NA	0.2525	NA	NA	NA	NA	NA	NA	NA	NA	NA	NA	NA	NA	0.2172	NA	NA	NA	NA	NA	NA	NA	NA	NA	NA	NA	NA	NA	NA	NA	NA	NA	NA	NA	NA	NA	NA	NA	0.1988	NA
MIMAT0019049	NA	0.291682	NA	NA	NA	NA	NA	NA	NA	NA	NA	NA	NA	0.3234	NA	NA	NA	NA	NA	NA	NA	NA	0.700015	NA	NA	NA	0.2517	NA	NA	NA	NA	0.2888	NA	0.2141	NA	NA	NA	NA	0.3057	0.2701	NA	NA	NA	NA	NA	0.3655	0.2032	NA	NA
MIMAT0004959	NA	NA	1.3279	NA	NA	NA	NA	0.7525	NA	1.1589	2.32657	NA	NA	NA	NA	NA	NA	0.2926	0.649739	0.2445	0.2972	0.2969	0.2728	1.20139	0.739751	0.3397	0.465942	0.4456	0.344127	NA	0.1761	NA	0.4033	NA	NA	NA	0.3161	NA	0.3057	NA	5.51944	NA	NA	NA	NA	0.2536	0.2032	NA	NA
MIMAT0019044	NA	NA	NA	NA	NA	NA	NA	NA	NA	NA	NA	NA	NA	NA	0.6202	NA	NA	NA	NA	NA	NA	0.543004	NA	NA	0.1814	NA	NA	NA	0.1823	NA	NA	NA	NA	NA	NA	NA	NA	NA	NA	NA	NA	NA	NA	NA	NA	0.1324	NA	NA	NA
MIMAT0019045	NA	NA	NA	NA	NA	NA	NA	NA	NA	NA	NA	NA	NA	NA	NA	NA	NA	NA	NA	NA	NA	NA	NA	NA	NA	NA	NA	NA	NA	NA	NA	NA	NA	NA	NA	NA	NA	NA	NA	NA	NA	NA	NA	NA	NA	NA	NA	NA	NA
MIMAT0019042	NA	NA	NA	NA	NA	NA	NA	0.7525	NA	NA	NA	NA	NA	NA	NA	NA	NA	NA	NA	NA	NA	0.2969	NA	NA	NA	NA	NA	NA	NA	NA	NA	NA	NA	NA	NA	NA	NA	NA	NA	NA	NA	NA	NA	NA	NA	NA	NA	NA	NA
MIMAT0019043	NA	NA	NA	NA	NA	NA	NA	NA	NA	NA	NA	NA	NA	NA	NA	NA	NA	NA	NA	NA	NA	NA	NA	NA	NA	NA	NA	NA	NA	NA	NA	NA	NA	NA	NA	NA	NA	NA	NA	NA	NA	NA	NA	NA	NA	NA	NA	NA	NA
MIMAT0019040	NA	NA	NA	NA	NA	NA	NA	NA	NA	NA	0.2525	NA	NA	NA	NA	NA	NA	NA	NA	NA	NA	NA	NA	NA	NA	NA	NA	NA	NA	0.146	NA	NA	NA	NA	NA	NA	NA	NA	NA	NA	NA	NA	NA	NA	NA	NA	NA	NA	NA
MIMAT0019041	NA	NA	NA	NA	NA	NA	NA	NA	NA	NA	NA	NA	NA	0.3234	NA	NA	0.3711	NA	NA	0.2445	NA	0.753181	NA	0.4059	NA	NA	NA	NA	NA	NA	0.1761	NA	NA	NA	NA	NA	NA	NA	NA	NA	0.131	NA	NA	NA	NA	NA	0.381281	NA	0.3976
MIMAT0026736	NA	NA	NA	NA	0.6599	NA	0.2515	NA	NA	NA	0.4673	NA	0.3091	NA	NA	NA	NA	NA	0.2505	NA	NA	0.2969	0.502128	0.2172	NA	NA	NA	0.4456	0.1823	NA	NA	0.2888	NA	NA	NA	0.648065	NA	0.4351	0.3057	NA	NA	NA	NA	NA	0.1979	NA	0.2032	NA	NA
MIMAT0004761	1.25036	1.29629	NA	0.3516	NA	NA	0.4656	1.90257	0.786192	1.95481	0.2525	3.07483	0.309078	NA	NA	NA	0.6661	1.232	0.649715	0.2445	0.54351	1.37811	2.04354	0.405938	1.30677	NA	NA	1.82096	2.37188	0.146	0.721668	NA	0.4033	0.847985	0.408219	0.2498	0.5752	0.865132	2.45512	2.84349	NA	0.2065	0.1992	2.07196	0.1979	0.365521	0.3813	NA	0.708964
MIMAT0026734	NA	0.291682	NA	1.25083	0.6599	0.2677	NA	1.90254	NA	NA	1.3391	0.4037	0.309078	NA	NA	0.1981	NA	NA	0.4639	0.63603	0.937435	0.753091	1.02919	0.722349	0.342518	NA	0.652443	0.78556	0.489619	0.400007	0.474542	0.5293	0.7181	1.18903	1.71755	1.6226	0.575236	0.1601	0.3057	1.02116	0.464939	0.547595	0.1992	0.1808	0.66723	0.469271	0.812528	0.1988	NA
MIMAT0026735	NA	NA	NA	NA	NA	0.2677	NA	NA	NA	NA	NA	NA	NA	0.3234	NA	NA	NA	NA	0.2505	NA	NA	NA	NA	NA	NA	0.3397	NA	NA	0.1823	NA	NA	0.2888	NA	NA	NA	NA	0.3161	NA	NA	1.02121	0.131	0.2065	NA	NA	NA	NA	NA	0.3735	NA
MIMAT0004947	0.3514	0.9229	NA	1.2508	0.3674	NA	0.2515	3.0928	NA	0.2696	7.46875	0.9771	0.563519	NA	NA	2.27127	NA	0.2926	NA	1.68522	0.2972	0.2969	NA	NA	0.8511	NA	NA	NA	0.9583	0.146	0.47452	0.735394	NA	0.2141	0.8619	0.6481	0.3161	0.6661	1.2725	NA	0.131	1.5851	0.3741	0.3415	NA	0.566136	NA	1.39256	NA
MIMAT0026738	2.70393	5.23356	4.07542	1.4091	4.20164	2.50847	4.05452	1.61073	3.73533	2.61755	1.2257	2.89861	2.80205	1.70565	NA	1.80844	3.60269	2.91077	2.78203	4.54493	2.79666	5.29947	5.09162	2.87485	3.31856	4.31102	3.00923	3.04221	5.25479	0.615911	1.49439	NA	3.76317	3.17003	2.1484	2.56434	2.88143	4.18988	4.13085	4.51267	4.32276	2.60354	3.5794	2.36151	1.1217	2.75844	1.49311	5.28453	3.6351
MIMAT0004762	NA	0.291682	0.4622	0.634082	NA	0.2677	0.465597	2.84035	0.7863	1.01963	0.4673	1.55439	0.967779	1.1741	0.6202	0.795803	0.3711	0.535746	0.2505	0.798006	1.61302	0.5429	0.502128	0.981656	NA	NA	NA	2.31638	0.1823	0.712854	0.1761	1.07586	1.55343	0.400494	3.45582	0.648065	NA	1.03997	NA	1.28769	0.735899	0.3871	1.02592	0.341444	0.3718	1.10648	0.539793	0.373494	0.708964
MIMAT0004765	0.6337	0.835129	1.3279	1.55171	2.16354	0.4935	0.651991	NA	NA	0.2696	1.10268	0.4037	0.967814	0.5875	NA	0.3723	0.666009	0.925476	0.9621	1.30874	0.937422	1.24539	NA	1.20138	1.30673	0.845206	1.09996	1.29135	0.958248	0.146	0.830977	0.2888	1.55341	0.4006	1.10057	0.462664	0.985358	0.3042	1.40709	1.61313	0.464939	0.94358	1.2217	1.64911	0.3718	0.971603	0.931684	0.1988	0.708964
MIMAT0024598	0.3514	0.418028	NA	1.07301	0.659972	NA	0.465597	2.14516	NA	1.1589	0.968149	NA	0.1628	0.3234	NA	NA	0.3711	NA	NA	0.4534	NA	NA	0.502128	NA	0.342518	0.3397	NA	NA	0.344127	0.278573	0.603371	0.915708	0.4033	NA	0.2185	NA	0.3161	0.769012	NA	NA	0.251089	0.547595	0.374203	NA	1.21597	1.10657	0.539776	1.39243	0.3976
MIMAT0026742	NA	0.4179	NA	NA	NA	NA	0.2515	0.7525	0.446	0.2696	0.2525	0.4037	NA	NA	NA	0.1981	NA	NA	NA	NA	NA	NA	0.2728	NA	NA	NA	NA	NA	NA	NA	NA	NA	NA	NA	NA	NA	NA	0.1601	NA	NA	NA	NA	NA	0.1808	NA	NA	0.2032	NA	NA
MIMAT0027027	NA	NA	NA	NA	NA	NA	NA	NA	NA	0.2696	NA	0.4037	NA	NA	NA	NA	NA	NA	NA	NA	NA	NA	NA	NA	NA	NA	NA	NA	NA	NA	NA	NA	NA	NA	NA	NA	NA	NA	NA	NA	NA	NA	NA	NA	NA	NA	NA	NA	NA
MIMAT0004767	2.10753	2.74676	2.81591	2.36146	3.47896	0.860451	4.85774	4.71877	4.52984	1.79313	3.11264	2.37774	0.967747	3.39913	3.61821	2.31462	2.77973	2.6255	1.71173	3.4312	2.84338	3.90074	1.80653	0.722273	2.66889	2.77415	1.53898	3.65305	2.25462	0.615909	1.99482	1.22012	2.83344	1.95613	2.52133	2.19897	2.97425	2.62373	3.09617	3.62355	2.66072	3.11996	3.5614	2.94036	2.3549	2.41272	2.75434	2.59071	3.0529
MIMAT0004766	6.71769	6.74232	7.60238	7.70776	7.31597	8.36514	8.16514	7.95117	5.4392	7.78297	8.22007	9.6399	8.4733	7.76074	8.2451	7.97559	7.64738	7.66785	7.69165	9.01173	8.03991	7.92038	7.31474	8.26006	7.45709	8.29715	7.92614	7.95094	7.97022	5.77865	7.41062	7.58181	7.7252	6.84258	6.36771	7.73405	7.19718	6.86094	7.53001	6.30455	6.45131	8.17365	7.87666	7.62306	7.71537	7.79287	8.20469	8.04371	6.66668
MIMAT0018098	NA	NA	0.4622	NA	NA	NA	NA	NA	NA	NA	0.2525	NA	NA	0.3234	NA	NA	NA	NA	NA	0.2445	NA	NA	NA	NA	NA	NA	NA	NA	NA	NA	NA	NA	NA	0.2141	NA	NA	NA	NA	NA	NA	NA	NA	NA	NA	NA	0.1324	NA	NA	NA
MIMAT0018099	NA	NA	NA	NA	NA	NA	NA	NA	NA	NA	NA	NA	NA	NA	NA	NA	NA	NA	NA	NA	NA	NA	NA	NA	NA	NA	NA	NA	NA	NA	NA	NA	NA	NA	NA	NA	NA	NA	NA	NA	NA	NA	NA	NA	NA	NA	NA	NA	NA
MIMAT0027617	NA	NA	NA	0.3516	NA	NA	NA	NA	NA	NA	NA	NA	NA	NA	NA	0.1981	NA	NA	NA	NA	NA	NA	NA	NA	NA	NA	NA	NA	NA	NA	NA	NA	NA	0.2141	NA	NA	NA	NA	NA	NA	NA	0.2065	NA	NA	NA	0.2536	NA	0.3735	NA
MIMAT0027612	NA	NA	NA	NA	NA	NA	NA	NA	NA	NA	NA	NA	NA	NA	NA	NA	NA	NA	NA	NA	NA	NA	NA	NA	NA	NA	NA	NA	NA	NA	NA	NA	NA	NA	NA	NA	NA	NA	NA	NA	NA	NA	NA	NA	NA	NA	NA	NA	NA
MIMAT0004948	NA	NA	NA	NA	NA	NA	NA	NA	NA	NA	1.54223	NA	NA	NA	NA	NA	NA	NA	NA	0.4534	NA	NA	NA	NA	NA	NA	NA	NA	NA	NA	NA	NA	NA	NA	NA	NA	NA	NA	NA	NA	NA	NA	NA	0.1808	NA	NA	NA	NA	NA
MIMAT0004800	1.07258	1.0841	2.13699	2.87708	3.278	0.86047	2.47784	4.06588	1.4913	2.51752	1.5423	2.83479	1.13404	2.46561	2.25087	0.913124	2.17644	1.08694	1.33171	3.57222	1.90508	2.4171	2.584	0.722349	1.30675	3.12089	1.53904	2.20756	2.87411	0.511963	2.25236	0.529319	2.62298	3.00726	4.04709	2.00877	1.15368	2.70387	2.97154	3.07262	2.08137	1.79164	1.39419	2.28453	1.02084	2.12554	2.34589	1.68543	3.35089
MIMAT0004801	2.28132	2.04824	3.03114	1.80048	3.75169	1.86823	3.16973	NA	2.09102	1.611	2.62375	0.718783	2.3735	2.91346	1.05254	2.68864	2.58193	2.05227	2.20252	2.66788	2.2896	3.16932	2.63324	2.51375	2.81331	3.47101	2.3765	3.65307	3.20443	1.11872	2.56879	2.70936	2.284	3.09094	3.91262	3.62549	1.15362	3.08925	2.88196	2.92396	1.71434	2.83895	2.32092	2.43462	1.12156	3.42047	2.68816	2.7258	3.77544
MIMAT0004803	0.3514	NA	NA	NA	NA	NA	NA	NA	NA	NA	NA	NA	0.1628	NA	NA	NA	NA	NA	NA	NA	NA	NA	NA	NA	NA	NA	NA	NA	NA	NA	NA	NA	NA	NA	0.2185	NA	NA	NA	NA	NA	0.131	NA	NA	NA	0.1979	0.2536	NA	NA	NA
MIMAT0004804	NA	NA	NA	NA	NA	NA	NA	NA	NA	NA	NA	NA	NA	NA	NA	NA	NA	NA	NA	NA	NA	NA	NA	NA	NA	NA	NA	NA	NA	NA	NA	NA	NA	NA	NA	NA	NA	NA	NA	NA	NA	NA	NA	NA	NA	NA	NA	0.1988	0.708964
MIMAT0004805	0.3514	1.00582	1.70735	NA	2.16349	NA	1.22227	0.7525	0.446	1.95481	3.64092	1.38642	0.4419	0.587415	NA	0.527631	1.6105	NA	0.6497	1.68519	0.753915	1.37813	1.1693	0.405938	1.30673	1.97102	0.652443	1.29138	1.23088	NA	0.1761	0.2888	0.976396	0.848045	1.56641	0.2498	NA	1.03998	1.40705	1.02116	1.33395	1.50922	0.1992	0.848912	0.3718	0.656806	0.682585	3.77695	1.18225
MIMAT0026605	NA	NA	NA	NA	NA	NA	NA	NA	NA	NA	0.65426	NA	0.1628	NA	NA	NA	NA	NA	NA	0.635936	NA	NA	NA	NA	0.48742	0.6145	0.2517	NA	0.489685	NA	NA	NA	NA	0.400494	NA	0.2498	NA	NA	0.557813	NA	NA	0.2065	0.1992	0.1808	NA	NA	0.539793	NA	NA
MIMAT0004808	7.18777	7.68464	7.57121	7.72289	8.44466	7.37126	7.35103	10.1022	7.7514	7.45996	7.98769	10.7784	7.7353	7.60747	8.9455	6.3827	7.18327	7.11245	7.0175	7.99168	7.48925	8.94039	8.01867	7.55817	6.75376	8.88902	7.78992	9.54809	9.20718	5.60957	7.15214	7.8197	7.36766	7.4638	6.42373	8.84774	7.90437	8.01773	7.45245	8.41697	7.28841	8.66588	7.16536	7.33412	7.12832	9.94024	8.27475	6.87398	8.82002
MIMAT0004809	2.2813	4.21595	3.79063	3.12538	3.87084	3.43136	3.82176	NA	4.70035	3.69127	3.40084	3.12905	2.87435	3.21619	2.2509	4.27813	3.20391	3.28811	2.47269	3.94514	2.64656	5.30779	3.94145	3.21488	3.27926	4.05865	3.13975	2.90961	4.91806	2.84354	3.87093	3.69677	3.5414	3.868	4.28348	3.48642	2.36853	3.71006	3.82934	4.48642	4.25974	2.44955	3.59715	3.01373	2.5486	4.29608	3.5717	3.86732	3.70696
MIMAT0026608	NA	NA	NA	NA	NA	NA	NA	NA	NA	NA	NA	NA	NA	0.3234	NA	NA	NA	NA	NA	0.635936	0.2972	NA	NA	NA	NA	0.3397	NA	NA	NA	NA	NA	NA	NA	NA	NA	NA	NA	NA	NA	0.2701	NA	NA	0.1992	0.1808	NA	NA	NA	NA	NA
MIMAT0026609	NA	NA	NA	NA	NA	NA	NA	NA	NA	NA	NA	NA	NA	NA	NA	NA	NA	NA	NA	NA	NA	NA	NA	NA	NA	NA	NA	NA	NA	NA	NA	NA	NA	NA	NA	NA	NA	NA	NA	NA	NA	NA	NA	NA	NA	NA	NA	NA	NA
MIMAT0018090	NA	NA	NA	0.3516	NA	NA	NA	NA	NA	0.2696	NA	NA	NA	NA	0.6202	NA	NA	NA	NA	0.2445	NA	NA	NA	NA	NA	0.3397	NA	NA	NA	NA	0.1761	NA	NA	NA	NA	NA	NA	NA	NA	NA	NA	0.2065	NA	NA	NA	0.1324	NA	NA	NA
MIMAT0004484	7.92078	8.11411	7.75392	8.03817	9.65522	8.2354	8.65679	12.7574	8.11972	9.20834	7.59966	9.36553	7.61736	9.08101	9.54717	7.86882	8.14429	7.77834	7.91555	9.00291	7.65233	9.45141	7.68537	7.53052	8.28837	8.56728	7.97942	8.03492	8.86015	6.71371	7.75377	7.97901	7.69178	6.8998	9.69815	7.72767	7.16551	8.90022	8.26353	9.49404	8.13173	7.75156	9.22536	8.77436	7.56447	9.00272	7.97422	7.91892	8.87759
MIMAT0022706	NA	0.922944	2.00748	1.07295	1.59931	0.2677	1.09939	NA	2.2088	0.496664	NA	0.977166	0.675642	0.3234	NA	0.1981	0.666009	NA	NA	1.07588	0.5436	NA	2.24697	0.405938	0.739748	0.614462	0.2517	NA	1.38773	0.2786	0.1761	0.2888	1.96445	0.970812	NA	0.462664	0.794806	1.03997	2.02429	0.2701	2.17542	1.34414	1.75209	0.952054	0.1979	0.822842	0.6826	NA	0.709
MIMAT0022705	0.869788	0.291682	0.4622	0.870137	NA	0.2677	1.09938	NA	NA	NA	NA	NA	0.3091	NA	NA	0.1981	0.666009	0.2926	0.649715	1.07592	NA	NA	NA	0.2172	0.3425	0.3397	0.2517	1.49031	0.3442	0.278573	0.1761	0.2888	0.4033	NA	0.575758	0.648122	0.3161	NA	0.557813	0.2701	0.251089	0.5476	0.1992	0.3415	0.3718	0.656846	0.2032	0.798105	NA
MIMAT0028221	NA	NA	NA	NA	0.3674	NA	NA	0.7525	NA	0.692803	NA	NA	0.1628	0.5875	NA	0.527631	NA	NA	NA	NA	NA	0.543004	NA	0.405938	NA	NA	NA	NA	0.344127	NA	0.333024	NA	NA	NA	0.2185	NA	0.3161	0.555293	NA	NA	NA	NA	0.1992	0.1808	NA	0.1324	0.812494	0.1988	NA
MIMAT0004481	5.33767	4.73592	5.18962	3.68544	6.15927	5.49336	5.31655	1.24453	4.88856	4.10706	3.17508	3.07479	4.65853	4.05153	3.26215	3.692	4.80683	4.77112	3.85429	5.31386	4.25349	4.69499	3.25318	4.46718	4.81065	4.9665	4.59997	4.88695	5.14377	3.11593	4.55993	5.63672	4.67303	3.17001	6.64962	5.30607	3.46507	5.69524	4.67478	5.46735	3.22732	5.59674	5.7665	5.4636	3.7543	4.77257	4.50006	3.77692	4.04874
MIMAT0022701	NA	NA	NA	NA	NA	NA	NA	NA	NA	NA	NA	NA	NA	NA	NA	NA	NA	NA	NA	NA	NA	NA	NA	NA	NA	NA	NA	NA	NA	NA	NA	NA	NA	NA	NA	NA	NA	NA	NA	NA	NA	NA	NA	NA	NA	NA	NA	NA	NA
MIMAT0022700	NA	0.291682	NA	NA	NA	NA	0.465597	NA	NA	0.2696	0.2525	0.4037	NA	NA	NA	NA	NA	NA	0.2505	0.2445	NA	0.2969	NA	0.2172	NA	0.845206	0.2517	0.78556	0.621834	NA	0.333024	NA	NA	NA	NA	NA	NA	NA	0.5577	NA	NA	NA	NA	0.1808	NA	0.2536	NA	0.1988	NA
MIMAT0004488	0.3514	0.4179	0.4622	NA	0.3674	NA	0.2515	NA	NA	0.2696	NA	0.4037	0.1628	0.3234	NA	0.1981	NA	NA	0.6497	0.453506	0.2972	0.2969	NA	0.4059	0.1814	0.3397	0.2517	NA	0.621847	0.146	0.1761	NA	0.7181	NA	0.5757	0.2498	0.5752	0.1601	0.3057	0.4976	0.361955	NA	0.1992	0.1808	NA	0.742206	0.2032	0.3735	NA
MIMAT0004489	2.36091	2.12433	2.81592	2.19762	3.98093	2.02105	2.37567	NA	2.0911	1.51058	2.2121	1.8411	1.85942	2.59122	1.0526	2.72114	1.7429	2.26969	2.3167	1.4125	1.99063	2.53543	1.88993	2.42926	1.87958	2.71704	2.32256	2.51207	3.45534	0.969814	0.831	1.87158	2.54534	2.68719	2.20056	2.56438	1.1537	1.97596	2.10558	3.20735	2.63882	1.97219	2.03861	2.07196	1.38785	2.15697	1.83641	2.40196	1.53807
MIMAT0022709	0.869788	0.534056	1.53005	0.3516	1.73123	1.50343	1.22226	NA	0.446	1.1589	NA	0.718783	0.876756	1.00368	NA	0.527672	1.11992	0.743762	1.53415	1.30878	0.753837	0.5429	1.16927	0.572818	0.1814	1.04403	1.33614	NA	1.23093	NA	0.474542	0.735411	0.976396	0.2141	2.09413	0.462664	0.3161	0.769084	0.3057	0.2701	NA	0.943593	0.530255	0.48603	0.794976	0.566109	NA	0.1988	1.18222
MIMAT0022708	NA	NA	NA	NA	NA	NA	0.817	1.9025	NA	NA	NA	0.4037	0.1628	NA	1.0526	NA	NA	NA	NA	0.2445	0.2972	NA	2.04354	0.572783	0.342518	NA	NA	NA	NA	NA	0.1761	0.2888	0.4033	NA	NA	NA	0.3161	1.19587	NA	NA	0.131	NA	NA	0.1808	0.1979	0.1324	NA	NA	NA
MIMAT0022839	NA	NA	NA	0.3516	NA	NA	NA	NA	NA	NA	NA	NA	NA	NA	NA	NA	NA	NA	NA	NA	NA	NA	NA	NA	NA	NA	0.2517	NA	NA	NA	NA	NA	NA	0.2141	NA	NA	NA	NA	NA	NA	NA	NA	0.1992	0.1808	NA	NA	NA	NA	0.3976
MIMAT0022838	NA	0.291682	NA	0.3516	0.3674	NA	NA	NA	NA	NA	NA	NA	NA	0.3234	NA	NA	NA	0.2926	NA	NA	NA	NA	NA	NA	0.1814	NA	NA	NA	0.1823	NA	NA	NA	NA	NA	NA	NA	0.3161	NA	NA	NA	0.131	0.2065	NA	0.1808	NA	NA	NA	NA	NA
MIMAT0015039	NA	NA	NA	NA	NA	NA	0.2515	NA	NA	NA	NA	NA	NA	NA	NA	NA	NA	NA	NA	NA	NA	NA	NA	NA	NA	NA	NA	NA	NA	NA	NA	NA	NA	NA	NA	NA	NA	NA	NA	NA	NA	NA	NA	NA	NA	NA	NA	NA	NA
MIMAT0015038	NA	NA	NA	NA	NA	NA	NA	NA	NA	NA	0.2525	NA	0.1628	NA	NA	NA	NA	NA	NA	NA	NA	NA	0.2728	NA	NA	NA	NA	NA	0.1823	NA	NA	NA	NA	NA	NA	NA	NA	NA	NA	0.2701	NA	NA	NA	NA	0.1979	0.1324	NA	0.1988	NA
MIMAT0003306	NA	NA	0.4622	1.07295	NA	NA	0.465597	1.61073	NA	1.01961	0.654242	1.19629	0.4419	1.00374	NA	0.795813	0.3711	NA	0.463872	0.635936	0.2972	0.936517	0.2728	0.2172	0.954458	NA	0.2517	0.4456	1.05491	NA	0.1761	NA	1.19539	0.5656	0.986213	0.2498	NA	0.555289	0.3057	0.693993	0.891832	0.2065	0.67098	0.48603	NA	0.566142	0.2032	0.3735	0.708964
MIMAT0003252	NA	NA	NA	NA	NA	NA	NA	NA	NA	NA	NA	NA	NA	NA	NA	NA	NA	NA	NA	NA	NA	NA	NA	NA	NA	NA	NA	NA	NA	NA	NA	NA	NA	NA	NA	NA	NA	NA	NA	NA	NA	NA	NA	NA	NA	NA	NA	NA	NA
MIMAT0015033	NA	NA	NA	NA	NA	NA	NA	NA	NA	NA	NA	0.4037	NA	NA	NA	NA	NA	NA	NA	NA	NA	NA	NA	NA	NA	NA	NA	NA	NA	NA	NA	NA	NA	NA	0.2185	NA	NA	NA	NA	NA	0.251089	NA	NA	NA	NA	NA	NA	NA	NA
MIMAT0015032	NA	NA	0.4622	NA	0.3674	0.493416	NA	0.7525	0.446	0.496664	0.4673	0.4037	0.3091	NA	0.6202	NA	0.3711	NA	NA	NA	NA	NA	0.2728	NA	0.3425	NA	NA	NA	NA	0.146	NA	0.2888	0.4033	0.847994	0.2185	0.2498	NA	0.304195	NA	0.4976	NA	NA	0.1992	NA	0.1979	NA	0.2032	NA	0.3976
MIMAT0015031	0.3514	NA	NA	0.634082	0.3674	0.2677	0.2515	NA	NA	0.692803	1.44431	NA	NA	NA	1.0526	0.1981	NA	0.535746	NA	0.635936	NA	0.2969	0.502128	NA	NA	NA	0.652443	1.06052	0.3442	NA	NA	0.5293	NA	0.565633	0.861961	0.959836	NA	0.555197	0.3057	0.2701	0.2511	0.2065	0.1992	0.48598	NA	NA	0.381281	NA	0.3976
MIMAT0015030	NA	NA	NA	NA	NA	NA	NA	NA	NA	NA	NA	NA	NA	NA	NA	NA	NA	NA	NA	NA	NA	NA	NA	NA	NA	NA	NA	NA	NA	NA	NA	NA	NA	NA	NA	NA	NA	NA	NA	NA	NA	NA	NA	0.1808	NA	NA	NA	NA	NA
MIMAT0015037	NA	NA	NA	NA	NA	NA	NA	NA	NA	NA	NA	NA	NA	NA	NA	NA	NA	NA	NA	NA	NA	NA	NA	NA	NA	NA	NA	NA	NA	0.146	NA	NA	NA	NA	0.2185	NA	NA	NA	NA	NA	NA	NA	NA	NA	NA	NA	NA	NA	NA
MIMAT0022834	5.04402	4.16287	5.73086	4.97054	6.42091	5.3053	6.53595	5.46382	6.70393	4.69276	6.27255	5.61784	4.70553	6.17241	6.28188	5.12955	5.5383	4.9808	5.07104	6.68291	5.62272	6.59237	4.47462	3.64775	5.81934	5.17171	4.10427	5.66043	5.64496	2.90641	5.91153	4.17503	6.01918	5.0091	5.61178	4.76951	5.51813	5.67548	5.83699	6.31581	4.75228	5.73653	5.7665	5.65544	4.80972	5.24432	4.24784	4.15751	5.35702
MIMAT0015035	0.633753	0.534125	NA	0.634	1.59927	NA	NA	NA	NA	0.8654	2.53133	NA	NA	0.5875	NA	NA	NA	NA	NA	NA	NA	NA	1.41431	0.2172	NA	NA	NA	NA	NA	NA	NA	NA	NA	0.8481	NA	NA	NA	1.12	1.27261	NA	NA	NA	NA	0.486	NA	0.5661	NA	NA	NA
MIMAT0015034	NA	NA	NA	NA	0.3674	NA	NA	NA	NA	NA	NA	NA	NA	NA	NA	NA	NA	NA	NA	NA	NA	NA	NA	NA	NA	NA	NA	NA	NA	0.146	NA	NA	NA	NA	0.2185	NA	NA	NA	NA	NA	NA	NA	NA	0.1808	NA	NA	NA	NA	0.3976
MIMAT0003261	NA	NA	NA	NA	NA	NA	NA	NA	NA	NA	NA	NA	NA	NA	NA	NA	NA	NA	NA	NA	NA	NA	NA	NA	NA	NA	NA	NA	NA	NA	NA	NA	NA	NA	NA	NA	NA	NA	NA	NA	NA	NA	NA	NA	NA	NA	NA	NA	NA
MIMAT0003260	2.76373	1.53801	2.13699	2.6422	3.278	0.860536	1.71603	NA	1.66616	1.28586	0.46732	NA	1.1342	2.76131	0.6202	2.22661	2.77974	1.08688	0.81437	2.70922	1.7171	1.71575	1.02911	1.39207	1.82607	2.39168	2.08401	NA	1.83171	0.615911	0.333	1.07595	0.976429	3.58984	3.61829	1.53124	0.985353	2.17652	2.10556	2.41263	4.93372	2.80761	2.40402	1.6491	0.527153	1.54701	1.14407	1.75026	1.53804
MIMAT0003265	NA	0.1532	NA	NA	NA	NA	0.2515	NA	NA	NA	0.2525	NA	NA	0.3234	NA	NA	NA	0.2926	NA	NA	NA	NA	NA	NA	NA	NA	NA	NA	0.3442	NA	NA	NA	NA	NA	0.2185	NA	NA	NA	NA	NA	0.2511	NA	NA	NA	NA	NA	NA	0.3735	0.709
MIMAT0003264	NA	NA	NA	NA	NA	NA	NA	NA	NA	NA	NA	NA	NA	NA	NA	NA	NA	NA	NA	NA	NA	NA	NA	NA	NA	NA	NA	NA	NA	NA	0.1761	NA	NA	NA	NA	NA	NA	NA	NA	NA	NA	NA	NA	NA	NA	NA	NA	NA	NA
MIMAT0003267	NA	NA	NA	NA	NA	NA	NA	NA	NA	NA	NA	NA	NA	NA	NA	NA	NA	NA	NA	NA	NA	NA	NA	NA	NA	NA	NA	NA	NA	NA	NA	NA	NA	NA	NA	NA	0.3161	NA	NA	NA	NA	NA	NA	0.1808	NA	NA	NA	NA	NA
MIMAT0003266	4.13318	2.56751	3.82944	3.21384	5.79498	5.01807	3.7002	2.1451	2.60218	2.46482	3.1751	3.79847	5.38353	3.09413	4.65366	3.57213	2.43313	4.10331	5.58571	4.06138	3.98827	3.46625	2.89782	3.98026	3.50033	4.36776	4.02203	2.68439	3.84171	4.49967	3.31576	5.21418	3.32627	2.65091	4.95039	4.14033	3.29549	4.4827	2.73632	2.35564	6.1078	3.70067	3.07062	4.78508	3.4969	4.0917	3.99761	2.81936	3.35091
MIMAT0003268	NA	NA	NA	NA	NA	NA	NA	NA	NA	0.2696	NA	NA	NA	NA	NA	NA	NA	NA	NA	NA	NA	NA	NA	NA	NA	NA	NA	NA	NA	NA	NA	NA	NA	NA	NA	NA	NA	NA	NA	0.2701	NA	NA	NA	NA	NA	NA	NA	NA	NA
MIMAT0003238	NA	NA	0.4622	0.3516	0.3674	NA	NA	NA	NA	NA	1.63399	NA	NA	0.3234	NA	NA	NA	0.2926	NA	0.2445	NA	NA	0.2728	NA	NA	NA	NA	NA	0.1823	NA	NA	NA	0.976396	NA	NA	NA	NA	NA	0.3057	0.2701	0.464897	NA	NA	NA	NA	NA	0.2032	NA	NA
MIMAT0003287	0.633753	NA	1.3279	0.870207	0.903	1.27942	1.09941	NA	0.446	NA	1.87868	NA	NA	2.96079	1.3848	NA	0.3711	0.925476	0.649739	0.2445	1.10027	NA	0.2728	0.572818	0.3425	1.04408	NA	1.06052	NA	0.4	NA	0.735411	0.718139	0.2141	0.986213	0.4626	NA	0.955221	0.3057	NA	1.22085	0.2065	NA	0.9521	0.1979	0.1324	0.2032	0.3735	NA
MIMAT0003286	NA	NA	NA	NA	NA	NA	NA	NA	NA	NA	NA	NA	NA	NA	NA	NA	NA	NA	NA	NA	NA	NA	NA	NA	NA	NA	NA	NA	NA	NA	NA	NA	NA	NA	NA	NA	NA	NA	NA	NA	NA	NA	NA	NA	NA	NA	NA	NA	NA
MIMAT0003285	NA	NA	NA	NA	NA	NA	NA	NA	NA	NA	NA	NA	NA	NA	NA	NA	NA	NA	NA	NA	NA	NA	NA	NA	NA	NA	NA	NA	NA	NA	NA	NA	NA	NA	NA	NA	NA	NA	NA	NA	NA	NA	NA	NA	NA	NA	NA	NA	NA
MIMAT0003284	1.68091	1.96793	3.38407	1.07295	3.72026	0.688548	1.94735	2.53423	1.66621	2.16771	4.20189	1.70485	0.4419	1.91242	NA	2.43731	2.50946	1.59623	2.26079	2.17258	1.37937	2.21887	2.72693	1.91134	2.7856	2.46288	2.08395	1.29138	1.98685	NA	0.333	0.2888	2.28396	1.28695	2.03786	1.53123	0.575236	1.69134	2.57426	0.866889	3.08913	1.72598	1.12712	1.52072	0.371899	1.54705	0.381281	5.21733	2.35768
MIMAT0003283	1.0725	NA	0.4622	NA	NA	0.2677	0.2515	0.7525	NA	0.692834	0.6542	1.70481	NA	0.81058	NA	0.1981	0.6661	0.925461	0.814314	4.98428	1.50088	0.543004	1.297	0.572818	0.342518	1.21878	0.2517	1.96163	3.09491	NA	2.12933	NA	0.9764	0.2141	4.89596	0.4626	0.5752	NA	1.12427	0.693921	0.561028	0.3871	0.530163	1.45195	0.667311	0.253664	0.812508	3.34503	2.93815
MIMAT0003282	NA	NA	NA	NA	NA	NA	NA	NA	NA	0.2696	NA	NA	NA	NA	NA	NA	NA	NA	NA	NA	NA	NA	NA	NA	NA	NA	NA	NA	NA	NA	NA	NA	NA	0.2141	NA	NA	NA	NA	NA	NA	NA	NA	NA	NA	NA	NA	NA	NA	NA
MIMAT0003280	NA	NA	NA	NA	0.3674	NA	NA	NA	NA	NA	NA	NA	NA	NA	NA	NA	NA	NA	NA	NA	NA	NA	NA	NA	NA	NA	NA	NA	0.3442	NA	NA	NA	NA	NA	NA	NA	NA	NA	NA	NA	NA	NA	0.3741	0.3415	NA	NA	NA	NA	NA
MIMAT0000241	NA	NA	NA	NA	NA	NA	NA	NA	NA	NA	NA	NA	NA	NA	NA	NA	NA	NA	NA	NA	NA	NA	NA	NA	NA	NA	NA	NA	NA	NA	NA	NA	NA	NA	NA	NA	NA	NA	NA	NA	NA	NA	NA	NA	NA	NA	NA	NA	NA
MIMAT0003302	0.3514	0.835248	NA	0.3516	0.3674	NA	0.465597	0.7525	NA	1.79315	0.65426	0.718783	0.309078	NA	NA	0.1981	NA	0.2926	NA	0.453506	NA	1.37819	0.502128	NA	0.487436	0.3397	0.2517	0.4456	0.489619	NA	0.1761	0.529319	0.4033	NA	0.408219	NA	0.575236	0.769084	NA	0.2701	0.361945	0.692018	0.1992	0.341444	0.667311	0.365521	0.2032	0.915685	NA
MIMAT0007349	NA	NA	NA	NA	NA	NA	NA	NA	NA	NA	NA	NA	NA	NA	NA	NA	NA	NA	NA	NA	NA	NA	NA	NA	NA	NA	NA	NA	0.1823	NA	NA	NA	NA	NA	NA	NA	NA	NA	NA	NA	NA	NA	NA	NA	NA	NA	NA	NA	NA
MIMAT0019697	NA	NA	NA	NA	NA	0.2677	NA	NA	NA	NA	NA	NA	NA	NA	NA	NA	NA	NA	NA	NA	NA	NA	NA	NA	NA	NA	NA	NA	NA	NA	NA	NA	NA	NA	NA	0.2498	0.3161	NA	NA	NA	0.131	NA	NA	NA	NA	NA	NA	NA	NA
MIMAT0019696	0.869743	0.741605	0.811703	0.3516	1.59929	NA	1.09941	1.90257	1.06127	0.2696	1.1027	1.19623	0.675642	0.3234	NA	0.795803	0.910745	0.535746	0.2505	1.41243	0.753915	1.81275	0.873935	0.4059	0.739762	1.86986	0.465942	1.29132	1.31147	NA	0.1761	NA	1.55343	0.565539	1.4845	0.6481	0.3161	1.33666	1.12435	1.40457	1.16076	NA	1.54811	NA	0.527064	1.04072	0.682591	1.81233	0.3976
MIMAT0019695	NA	NA	NA	NA	NA	NA	NA	NA	NA	NA	NA	NA	NA	NA	NA	NA	NA	NA	NA	NA	NA	NA	NA	NA	NA	NA	NA	NA	NA	0.146	NA	NA	NA	NA	NA	NA	NA	0.1601	NA	NA	NA	NA	NA	NA	NA	NA	0.2032	NA	NA
MIMAT0019694	NA	NA	NA	NA	NA	NA	NA	NA	NA	NA	NA	NA	NA	NA	NA	NA	NA	NA	NA	NA	NA	NA	NA	NA	NA	NA	NA	NA	NA	NA	NA	NA	NA	NA	NA	NA	NA	NA	NA	NA	NA	NA	NA	NA	NA	NA	NA	NA	NA
MIMAT0019693	NA	NA	NA	0.3516	NA	0.493416	NA	NA	0.446	NA	NA	NA	0.3091	0.3234	NA	0.372254	NA	NA	0.2505	0.636	NA	NA	1.16931	NA	0.954459	NA	NA	1.49024	0.3442	0.2786	NA	0.2888	NA	1.18903	0.575758	0.2498	NA	0.1601	0.557813	0.866832	0.131	0.2065	0.1992	1.7092	NA	0.3655	NA	0.3735	NA
MIMAT0019692	NA	NA	NA	NA	NA	NA	NA	NA	NA	NA	NA	0.4037	NA	NA	NA	NA	NA	NA	NA	NA	NA	0.2969	0.2728	NA	NA	NA	NA	NA	NA	0.146	NA	NA	NA	NA	NA	NA	NA	NA	NA	NA	NA	NA	NA	NA	NA	NA	NA	NA	NA
MIMAT0019691	NA	NA	NA	NA	NA	NA	0.2515	NA	NA	NA	NA	NA	NA	NA	NA	NA	NA	NA	NA	NA	NA	NA	NA	NA	NA	NA	NA	NA	NA	0.400007	NA	NA	NA	NA	0.2185	NA	NA	NA	NA	NA	NA	NA	NA	NA	NA	NA	NA	NA	NA
MIMAT0019704	NA	NA	NA	NA	NA	NA	NA	NA	NA	NA	NA	NA	NA	NA	NA	NA	NA	NA	NA	NA	NA	NA	NA	NA	NA	NA	NA	NA	NA	NA	NA	NA	NA	NA	NA	NA	NA	NA	NA	NA	NA	NA	NA	NA	NA	NA	NA	NA	NA
MIMAT0019699	NA	0.1532	0.8116	0.3516	0.3674	NA	0.651989	NA	0.446	0.865495	0.2525	0.4037	0.1628	0.587415	NA	0.667889	NA	0.2926	NA	NA	0.2972	0.2969	0.502128	NA	NA	NA	NA	NA	0.489619	NA	NA	NA	NA	NA	NA	NA	NA	0.769088	0.3057	NA	0.131	0.2065	0.5301	NA	0.1979	NA	0.682585	0.1988	0.3976
MIMAT0019698	NA	NA	NA	NA	NA	NA	NA	NA	NA	NA	0.2525	NA	NA	NA	NA	0.1981	NA	NA	NA	NA	NA	NA	NA	NA	0.1814	NA	NA	NA	NA	NA	NA	0.2888	NA	NA	NA	NA	NA	NA	NA	NA	NA	NA	NA	NA	NA	NA	NA	NA	NA
MIMAT0013771	NA	NA	NA	NA	NA	NA	NA	NA	NA	0.2696	NA	NA	NA	NA	NA	NA	NA	NA	NA	0.2445	NA	NA	NA	NA	NA	NA	NA	NA	NA	NA	NA	NA	NA	NA	NA	NA	NA	NA	NA	NA	NA	NA	NA	0.1808	NA	NA	NA	0.1988	NA
MIMAT0028114	NA	NA	NA	NA	NA	NA	NA	NA	NA	NA	NA	NA	NA	NA	NA	NA	NA	NA	NA	NA	NA	NA	NA	NA	NA	NA	NA	NA	NA	NA	NA	NA	NA	NA	NA	NA	NA	NA	NA	NA	0.131	NA	NA	NA	NA	NA	NA	NA	NA
MIMAT0028115	NA	NA	NA	NA	NA	NA	NA	NA	NA	NA	NA	NA	NA	NA	NA	NA	NA	NA	NA	NA	NA	NA	NA	NA	NA	NA	NA	NA	NA	NA	0.1761	NA	NA	NA	NA	NA	NA	NA	NA	NA	NA	NA	NA	NA	NA	0.2536	NA	NA	0.3976
MIMAT0028116	NA	NA	NA	NA	NA	NA	NA	NA	NA	NA	NA	NA	0.1628	NA	NA	NA	NA	NA	NA	NA	NA	NA	0.2728	NA	NA	0.3397	NA	NA	NA	NA	NA	NA	NA	NA	0.5757	NA	NA	0.4351	NA	NA	0.131	NA	NA	NA	NA	NA	NA	0.373494	NA
MIMAT0028117	NA	NA	NA	NA	NA	NA	NA	0.7525	NA	NA	NA	NA	NA	NA	NA	NA	NA	NA	NA	NA	NA	NA	NA	NA	NA	NA	NA	NA	0.1823	NA	NA	NA	NA	NA	NA	NA	NA	0.1601	NA	NA	NA	NA	NA	NA	NA	0.1324	NA	NA	NA
MIMAT0028110	NA	NA	NA	NA	NA	NA	NA	NA	NA	NA	NA	NA	NA	NA	NA	NA	NA	NA	NA	NA	NA	0.2969	NA	NA	NA	NA	NA	NA	NA	NA	NA	NA	NA	NA	NA	NA	NA	NA	NA	NA	NA	NA	NA	NA	NA	NA	NA	NA	NA
MIMAT0028111	NA	NA	NA	NA	NA	NA	NA	NA	NA	NA	NA	NA	NA	NA	NA	NA	NA	NA	NA	NA	NA	NA	NA	NA	NA	NA	NA	NA	NA	NA	NA	NA	NA	NA	NA	NA	NA	NA	NA	NA	NA	NA	NA	NA	NA	NA	NA	NA	NA
MIMAT0028113	NA	NA	NA	NA	NA	NA	NA	NA	NA	NA	NA	NA	NA	NA	NA	NA	NA	NA	NA	NA	NA	NA	NA	NA	NA	NA	NA	NA	NA	NA	NA	NA	NA	NA	0.2185	NA	NA	NA	NA	NA	NA	NA	NA	NA	NA	NA	NA	NA	NA
MIMAT0028118	0.3514	NA	0.4622	NA	NA	NA	0.2515	NA	NA	0.2696	0.6542	0.718783	0.309078	0.3234	NA	NA	NA	0.743762	0.2505	0.63603	NA	0.753091	NA	NA	0.48742	0.3397	NA	NA	0.489685	NA	NA	NA	NA	NA	NA	NA	0.3161	0.1601	0.3057	NA	0.464897	0.2065	0.799193	0.1808	0.3718	0.253664	NA	0.1988	NA
MIMAT0028119	NA	NA	NA	NA	NA	NA	NA	NA	NA	NA	0.46732	NA	NA	0.3234	NA	NA	NA	NA	NA	NA	NA	NA	NA	NA	NA	NA	NA	NA	NA	NA	NA	NA	NA	NA	NA	NA	NA	NA	NA	NA	NA	NA	NA	NA	NA	NA	NA	0.1988	NA
MIMAT0004980	0.3514	1.22904	1.32787	3.74605	0.903037	0.860405	1.94739	3.87709	3.16518	2.16772	5.63158	1.84112	0.876904	4.11562	1.65464	0.913156	2.4331	1.97191	1.53413	4.19833	3.17108	3.83298	1.80654	1.09572	2.07569	1.86984	2.86578	1.82102	3.22535	0.146	2.6898	0.529319	2.18512	4.11447	1.85435	2.60971	2.56046	0.555289	2.32532	3.62355	3.62199	0.823279	2.44382	0.952083	1.38787	3.34057	2.00901	3.3239	3.10703
MIMAT0004983	1.40857	1.42222	0.811703	4.34453	3.89915	1.39577	1.44041	4.38231	1.96282	0.496664	1.44422	1.55439	2.30534	1.32642	0.6202	0.795746	NA	0.925496	1.79291	4.01269	2.22043	2.1464	0.700015	1.39209	1.22637	2.59558	0.652407	1.49027	3.11753	0.278573	1.84651	0.529319	2.18512	1.89537	3.84858	1.43366	2.06505	1.46481	1.84632	2.96258	3.19776	2.0277	0.67098	0.617363	1.54143	1.39713	1.23958	2.31893	1.94712
MIMAT0004982	NA	0.641612	NA	0.870137	1.29286	0.493416	1.71603	1.61073	1.29223	0.2696	2.38059	1.38642	0.44188	1.32639	1.05254	0.91321	0.3711	0.743762	0.4639	1.84202	0.753837	1.49969	1.5228	0.7223	0.739764	0.614462	1.33614	2.68447	1.52908	0.400007	0.932618	NA	1.70382	1.37849	1.91815	0.959836	0.575236	1.26796	0.772354	1.95709	1.27848	0.69201	0.374203	1.04834	0.667172	1.28787	0.539793	1.47146	1.53807
MIMAT0004985	2.197	1.926	2.73637	2.93033	2.70264	1.86829	3.31482	3.57952	1.96282	2.66502	5.67003	2.83478	1.70936	2.3984	1.3848	1.54285	2.26719	2.39829	2.70022	2.39149	3.05676	4.2516	3.66192	2.66923	1.30671	3.66463	2.52724	3.37977	3.49036	1.69456	1.99486	3.09332	2.89732	3.14416	4.07536	3.33248	1.4408	3.31014	2.88194	3.52378	2.72437	3.01404	1.81405	2.46982	2.13118	2.93197	2.96464	2.78881	3.3509
MIMAT0002866	NA	NA	NA	NA	NA	NA	NA	NA	NA	NA	1.10268	NA	NA	NA	NA	NA	NA	NA	NA	NA	NA	NA	0.5022	NA	NA	NA	NA	NA	0.344127	NA	NA	NA	NA	NA	NA	NA	NA	NA	NA	NA	0.561	NA	NA	NA	NA	NA	NA	NA	NA
MIMAT0004986	NA	0.1532	NA	NA	0.3674	NA	0.2515	NA	NA	NA	NA	NA	NA	NA	NA	0.372254	NA	NA	NA	0.2445	NA	0.753091	NA	NA	NA	NA	NA	NA	NA	NA	NA	NA	NA	NA	0.5757	0.2498	NA	0.5552	0.3057	NA	0.251089	NA	NA	NA	NA	NA	NA	NA	NA
MIMAT0027418	NA	NA	NA	NA	NA	NA	NA	NA	NA	NA	NA	NA	NA	NA	NA	NA	NA	NA	NA	NA	NA	NA	NA	NA	0.1814	NA	NA	NA	NA	NA	NA	NA	NA	NA	NA	NA	NA	NA	NA	NA	NA	NA	NA	NA	NA	NA	NA	NA	NA
MIMAT0015021	NA	NA	NA	NA	NA	0.2677	NA	NA	NA	NA	NA	NA	NA	NA	NA	NA	NA	NA	NA	NA	NA	NA	NA	NA	NA	NA	NA	NA	NA	NA	NA	NA	NA	NA	NA	NA	NA	NA	NA	NA	NA	NA	NA	NA	NA	NA	NA	NA	NA
MIMAT0027559	NA	NA	NA	NA	NA	NA	NA	NA	NA	NA	NA	NA	NA	NA	NA	0.1981	NA	NA	NA	NA	NA	NA	NA	NA	0.1814	NA	NA	NA	NA	NA	NA	NA	NA	NA	NA	NA	NA	0.1601	NA	0.4976	NA	NA	NA	NA	NA	NA	NA	NA	NA
MIMAT0019879	0.3514	NA	0.4622	0.3516	NA	NA	0.465597	NA	NA	NA	1.44434	NA	0.1628	NA	0.6202	NA	NA	0.2926	NA	0.2445	0.2972	0.753091	0.2728	0.2172	0.619103	NA	NA	NA	0.742899	NA	0.474542	NA	0.4033	NA	0.2185	NA	0.5752	0.304195	0.3057	0.2701	0.735856	NA	NA	NA	NA	NA	NA	0.1988	1.18225
MIMAT0019878	NA	NA	0.4622	NA	NA	NA	NA	1.24453	NA	NA	1.63404	NA	NA	NA	0.6202	NA	NA	0.2926	0.463872	NA	NA	NA	NA	0.2172	NA	0.3397	NA	NA	NA	NA	0.333	NA	NA	0.2141	0.2185	NA	NA	0.1601	0.3057	NA	0.560981	NA	NA	NA	NA	0.1324	NA	NA	NA
MIMAT0027558	NA	NA	NA	NA	NA	NA	NA	NA	NA	NA	NA	NA	NA	0.3234	NA	NA	NA	NA	NA	NA	NA	NA	NA	NA	NA	NA	NA	NA	NA	NA	NA	NA	NA	NA	NA	NA	NA	NA	NA	NA	NA	NA	NA	NA	NA	0.1324	NA	NA	NA
MIMAT0019873	NA	0.291682	2.25581	NA	0.903098	1.50348	1.09941	1.2445	1.29229	1.01961	1.33911	0.4037	0.1628	1.32644	NA	1.46806	1.11999	0.535746	1.21866	1.84204	1.24648	1.49964	0.699952	0.981678	1.14129	1.044	0.965691	0.78556	0.854627	NA	0.831011	0.2888	1.19539	0.847994	0.575864	0.959909	0.5752	0.865098	0.772256	0.4976	0.464907	0.823279	1.2217	0.737799	0.3718	0.971581	0.2032	1.2202	NA
MIMAT0019872	NA	NA	NA	NA	NA	NA	NA	NA	NA	NA	NA	NA	NA	NA	NA	NA	NA	NA	NA	NA	NA	NA	NA	NA	NA	NA	NA	NA	NA	0.146	NA	NA	NA	NA	NA	NA	NA	NA	NA	NA	0.131	NA	NA	NA	NA	NA	NA	NA	NA
MIMAT0019871	0.3514	NA	NA	1.91046	NA	NA	0.2515	0.7525	NA	NA	1.10262	0.4037	NA	0.3234	NA	NA	NA	NA	NA	NA	NA	NA	NA	NA	NA	0.614462	NA	NA	0.1823	0.146	NA	0.2888	0.718139	NA	0.575758	NA	0.3161	0.769012	0.3057	0.497518	NA	NA	NA	NA	0.371899	NA	0.381281	NA	0.964942
MIMAT0019870	NA	NA	NA	NA	NA	NA	NA	NA	NA	0.2696	NA	NA	NA	NA	NA	NA	NA	NA	NA	NA	NA	NA	NA	NA	NA	NA	NA	NA	NA	NA	NA	NA	NA	NA	NA	NA	NA	NA	NA	NA	NA	NA	NA	NA	NA	NA	NA	NA	NA
MIMAT0019877	NA	NA	NA	NA	NA	NA	NA	NA	NA	NA	0.2525	NA	NA	NA	NA	NA	NA	NA	NA	NA	NA	NA	NA	NA	NA	NA	NA	NA	NA	NA	NA	NA	NA	NA	NA	NA	NA	NA	NA	NA	NA	NA	NA	NA	NA	NA	NA	NA	NA
MIMAT0019876	NA	NA	NA	NA	NA	NA	NA	NA	NA	NA	1.44422	NA	NA	NA	NA	NA	NA	NA	NA	NA	NA	NA	NA	NA	NA	NA	NA	NA	NA	NA	NA	NA	NA	NA	NA	NA	NA	NA	NA	NA	NA	NA	NA	NA	NA	NA	NA	NA	NA
MIMAT0019875	NA	0.1532	NA	NA	NA	NA	NA	NA	NA	NA	0.2525	NA	0.1628	NA	NA	NA	NA	NA	NA	NA	NA	NA	0.2728	NA	NA	NA	NA	NA	NA	NA	NA	NA	NA	NA	NA	NA	NA	NA	NA	NA	NA	NA	NA	NA	NA	NA	NA	NA	NA
MIMAT0019874	NA	0.1532	NA	NA	NA	NA	NA	0.7525	NA	NA	NA	NA	NA	NA	NA	NA	NA	NA	NA	0.2445	NA	NA	NA	NA	0.1814	NA	NA	NA	0.1823	0.146	NA	NA	NA	NA	NA	NA	NA	NA	NA	NA	NA	NA	NA	NA	0.1979	NA	NA	NA	NA
MIMAT0024617	NA	NA	NA	NA	NA	NA	NA	NA	NA	NA	NA	NA	NA	NA	NA	NA	NA	NA	NA	NA	NA	NA	NA	NA	NA	NA	NA	NA	NA	NA	NA	NA	NA	NA	NA	NA	NA	NA	NA	NA	NA	NA	NA	NA	NA	NA	NA	NA	NA
MIMAT0024616	NA	NA	NA	NA	NA	NA	NA	NA	NA	NA	NA	NA	NA	NA	NA	NA	NA	NA	NA	NA	NA	NA	NA	NA	NA	NA	NA	NA	NA	NA	NA	NA	NA	NA	NA	NA	NA	NA	NA	NA	NA	NA	NA	NA	NA	NA	NA	NA	NA
MIMAT0024615	NA	NA	NA	NA	NA	NA	NA	NA	NA	NA	NA	NA	NA	NA	NA	NA	NA	NA	NA	NA	NA	NA	NA	NA	NA	NA	NA	NA	NA	NA	NA	NA	NA	NA	NA	NA	NA	NA	NA	NA	NA	NA	NA	NA	NA	NA	NA	NA	NA
MIMAT0024614	NA	NA	NA	NA	NA	NA	NA	NA	NA	0.4967	NA	NA	NA	NA	NA	NA	NA	NA	NA	NA	NA	NA	NA	NA	NA	NA	NA	NA	NA	NA	NA	NA	NA	NA	NA	NA	NA	NA	NA	NA	NA	NA	NA	NA	0.1979	NA	NA	NA	NA
MIMAT0024613	NA	NA	NA	NA	NA	NA	0.465597	NA	NA	NA	NA	NA	0.1628	NA	NA	NA	NA	NA	0.2505	NA	NA	NA	NA	NA	NA	NA	NA	NA	0.1823	NA	NA	NA	NA	0.2141	NA	NA	NA	NA	NA	NA	NA	0.2065	NA	NA	NA	NA	NA	NA	NA
MIMAT0024612	NA	NA	NA	NA	NA	NA	NA	NA	NA	NA	NA	NA	NA	NA	NA	NA	NA	NA	NA	NA	NA	NA	NA	NA	NA	NA	NA	NA	NA	NA	NA	NA	NA	NA	NA	NA	NA	NA	NA	NA	NA	NA	NA	NA	NA	NA	NA	NA	NA
MIMAT0024618	NA	NA	NA	NA	NA	NA	NA	NA	NA	NA	NA	NA	NA	NA	NA	NA	NA	NA	NA	NA	NA	NA	NA	NA	NA	NA	NA	NA	NA	NA	NA	NA	NA	NA	NA	NA	NA	NA	NA	NA	NA	NA	NA	NA	NA	NA	NA	NA	NA
MIMAT0000718	NA	NA	NA	NA	NA	NA	NA	NA	NA	NA	NA	NA	NA	NA	NA	NA	NA	NA	NA	NA	NA	NA	NA	NA	NA	NA	NA	NA	NA	NA	NA	NA	NA	NA	NA	NA	NA	NA	NA	NA	NA	NA	NA	NA	NA	NA	NA	NA	NA
MIMAT0022266	NA	NA	NA	NA	NA	NA	0.2515	NA	NA	NA	NA	NA	NA	NA	NA	0.1981	0.3711	NA	NA	NA	NA	NA	NA	NA	NA	0.6145	NA	NA	NA	NA	NA	NA	NA	NA	NA	NA	NA	NA	NA	NA	NA	0.2065	NA	NA	NA	NA	0.2032	NA	NA
MIMAT0000710	5.04402	4.15382	5.72056	4.97054	6.42091	5.3053	6.53595	5.46382	6.70393	4.69276	6.27255	5.61784	4.70553	6.17241	6.28188	5.12955	5.5383	4.9808	5.07104	6.6855	5.62272	6.59919	4.47462	3.64775	5.81934	5.1823	4.10427	5.65007	5.64496	2.90641	5.91153	4.17503	6.01918	5.0091	5.61178	4.76951	5.51813	5.67548	5.83699	6.31581	4.75228	5.73653	5.76257	5.65544	4.81727	5.24432	4.24784	4.15751	5.35702
MIMAT0000715	NA	NA	NA	NA	NA	NA	NA	NA	NA	NA	NA	NA	NA	NA	NA	NA	NA	NA	0.962041	NA	NA	NA	NA	NA	NA	NA	NA	NA	NA	NA	NA	NA	NA	NA	NA	NA	NA	NA	NA	NA	NA	NA	NA	NA	NA	NA	NA	NA	NA
MIMAT0000717	NA	NA	NA	NA	NA	NA	NA	NA	NA	NA	NA	NA	NA	NA	NA	NA	NA	NA	NA	NA	NA	NA	NA	NA	NA	NA	NA	NA	NA	NA	NA	NA	NA	NA	NA	NA	NA	NA	NA	NA	NA	NA	NA	NA	NA	NA	NA	NA	NA
MIMAT0022268	NA	NA	NA	NA	NA	NA	NA	NA	NA	NA	NA	NA	NA	NA	NA	NA	NA	NA	NA	NA	NA	NA	NA	NA	NA	NA	NA	NA	NA	NA	NA	NA	NA	NA	NA	NA	NA	NA	NA	NA	NA	NA	NA	NA	NA	NA	NA	NA	NA
MIMAT0022269	NA	NA	NA	NA	NA	NA	NA	NA	NA	NA	NA	NA	NA	NA	NA	NA	NA	NA	NA	NA	NA	NA	NA	NA	NA	NA	NA	NA	NA	NA	NA	NA	NA	NA	0.4081	NA	0.3161	NA	NA	0.497518	NA	0.2065	NA	NA	NA	0.1324	NA	NA	NA
MIMAT0027588	0.3514	0.4179	NA	0.3516	NA	NA	0.2515	NA	0.446	NA	0.2525	0.4037	0.1628	NA	0.6202	NA	NA	0.2926	NA	NA	0.2972	NA	NA	NA	NA	NA	NA	NA	NA	NA	NA	0.2888	NA	NA	NA	NA	0.3161	0.3042	NA	NA	0.361945	NA	0.799266	NA	NA	NA	NA	NA	NA
MIMAT0027589	0.3514	NA	0.4622	NA	0.3674	NA	0.4656	NA	NA	NA	NA	NA	0.1628	0.587415	NA	0.1981	0.910822	NA	NA	0.2445	NA	NA	0.2728	0.2172	0.342518	NA	0.2517	NA	0.4897	NA	NA	NA	NA	0.847985	0.408219	0.812412	NA	0.1601	0.3057	0.866889	1.22085	NA	0.3741	NA	NA	0.1324	NA	NA	NA
MIMAT0027582	NA	NA	NA	NA	NA	NA	0.2515	NA	NA	NA	0.2525	NA	NA	NA	NA	NA	NA	NA	NA	0.2445	NA	NA	NA	NA	NA	NA	NA	NA	NA	NA	NA	NA	NA	NA	NA	NA	NA	NA	0.3057	NA	NA	NA	NA	NA	NA	NA	NA	0.5294	NA
MIMAT0027583	NA	NA	NA	NA	NA	NA	NA	NA	NA	NA	0.2525	NA	NA	NA	NA	NA	0.3711	NA	NA	NA	NA	NA	NA	NA	NA	NA	NA	NA	NA	NA	NA	NA	NA	NA	NA	NA	NA	NA	NA	0.2701	NA	NA	NA	NA	NA	NA	NA	0.1988	NA
MIMAT0027580	NA	NA	NA	NA	NA	NA	NA	NA	NA	NA	NA	NA	NA	NA	NA	NA	NA	NA	NA	NA	0.2972	NA	NA	NA	NA	0.3397	NA	NA	0.1823	NA	NA	NA	NA	NA	NA	NA	NA	NA	0.557813	0.2701	NA	0.38711	NA	NA	0.1979	NA	NA	0.1988	NA
MIMAT0027581	NA	NA	NA	NA	NA	NA	NA	NA	NA	NA	NA	NA	NA	NA	NA	NA	NA	NA	NA	NA	NA	NA	NA	NA	NA	NA	NA	NA	NA	NA	NA	NA	NA	NA	NA	NA	NA	NA	NA	NA	NA	NA	NA	NA	NA	NA	NA	NA	NA
MIMAT0027586	NA	NA	NA	NA	NA	NA	NA	NA	NA	NA	NA	NA	NA	NA	0.6202	NA	NA	NA	NA	NA	NA	NA	NA	NA	NA	NA	0.2517	NA	0.1823	NA	NA	NA	NA	NA	NA	0.2498	NA	0.1601	NA	NA	NA	NA	0.1992	NA	NA	NA	NA	NA	NA
MIMAT0027587	1.07254	3.5548	1.53005	2.36149	2.88365	1.94667	3.04203	3.73596	1.49132	2.10014	2.38052	3.12906	2.19679	1.00374	2.5445	1.54292	0.3711	1.08691	1.86978	2.28622	1.90512	2.59125	2.0435	2.08709	1.38282	2.77415	1.33609	1.29133	1.98687	0.969791	3.72274	2.38145	2.37651	1.69602	1.48461	2.0088	1.97802	2.82828	0.772256	0.2701	2.50028	1.42904	2.557	1.70925	2.58442	2.67401	3.17254	1.8123	2.06122
MIMAT0027584	NA	NA	NA	NA	NA	NA	NA	NA	NA	NA	NA	NA	NA	NA	NA	NA	NA	NA	NA	NA	NA	NA	NA	NA	NA	NA	NA	NA	NA	NA	NA	NA	NA	NA	NA	NA	NA	NA	NA	NA	0.361955	NA	NA	NA	NA	NA	NA	NA	NA
MIMAT0019059	0.3514	5.35302	NA	7.75823	0.3674	NA	3.70019	NA	3.61247	NA	0.819716	NA	NA	NA	NA	NA	0.3711	NA	2.89668	5.93541	5.75082	0.2969	NA	NA	4.45292	NA	6.34738	4.30869	6.29893	NA	NA	NA	NA	NA	0.4081	0.462664	NA	NA	NA	0.2701	0.251089	4.90343	NA	2.32352	0.1979	0.1324	0.2032	NA	0.964942
MIMAT0019058	NA	0.291682	0.4622	0.870207	0.659972	0.86047	1.22226	1.24453	NA	0.2696	0.2525	1.19629	0.876756	0.587415	1.38475	0.372254	0.3711	0.743762	0.2505	0.2445	0.2972	0.543004	0.700015	0.572818	1.30673	1.6434	0.2517	0.4456	0.958262	0.278573	0.1761	0.2888	NA	0.847994	0.725945	0.2498	0.3161	0.555284	0.3057	0.693921	NA	0.69201	NA	0.48598	0.1979	0.656885	0.2032	0.1988	0.3976
MIMAT0003300	NA	NA	NA	NA	NA	NA	NA	NA	NA	NA	NA	NA	NA	NA	NA	NA	NA	NA	NA	NA	NA	NA	NA	NA	NA	NA	NA	NA	NA	NA	NA	NA	NA	NA	NA	NA	NA	NA	NA	NA	NA	NA	NA	NA	NA	NA	NA	NA	NA
MIMAT0019050	NA	NA	NA	NA	NA	NA	NA	NA	NA	NA	0.4673	NA	NA	NA	NA	NA	NA	NA	NA	NA	NA	NA	NA	NA	NA	NA	NA	NA	NA	NA	NA	NA	NA	NA	NA	NA	NA	NA	NA	NA	NA	NA	NA	NA	NA	0.365521	NA	NA	NA
MIMAT0019053	NA	NA	NA	0.634082	0.659972	NA	0.465597	NA	NA	0.2696	NA	NA	NA	NA	NA	NA	NA	NA	NA	NA	0.2972	NA	0.2728	NA	NA	NA	NA	NA	NA	0.146	NA	0.529319	NA	NA	NA	NA	NA	0.1601	NA	NA	0.131	NA	NA	NA	NA	NA	0.2032	NA	NA
MIMAT0019052	NA	0.4179	NA	0.870207	NA	0.2677	NA	NA	0.446	NA	0.2525	NA	0.1628	0.3234	NA	NA	NA	NA	NA	NA	NA	0.2969	NA	NA	NA	NA	NA	NA	0.1823	0.278573	0.47452	0.735394	NA	NA	0.408219	NA	0.3161	0.1601	0.3057	NA	0.464897	NA	0.1992	NA	0.371899	0.253664	0.2032	0.1988	0.3976
MIMAT0019055	NA	NA	NA	NA	NA	NA	NA	NA	NA	NA	NA	NA	NA	NA	NA	NA	NA	NA	NA	0.2445	NA	NA	NA	NA	NA	NA	NA	NA	NA	NA	NA	NA	NA	NA	NA	NA	NA	NA	NA	NA	NA	NA	NA	NA	NA	NA	NA	NA	NA
MIMAT0019054	NA	NA	NA	NA	NA	NA	NA	NA	NA	NA	NA	NA	NA	0.3234	NA	NA	0.3711	0.2926	NA	NA	0.5436	NA	0.2728	NA	NA	NA	NA	NA	NA	NA	0.1761	NA	NA	0.400494	0.861874	NA	0.3161	NA	NA	NA	0.131	NA	NA	NA	NA	0.1324	0.3813	NA	NA
MIMAT0019057	NA	NA	NA	NA	NA	NA	NA	NA	NA	NA	NA	NA	NA	NA	NA	NA	NA	NA	NA	NA	NA	NA	NA	NA	NA	NA	NA	NA	NA	NA	NA	NA	NA	NA	NA	NA	NA	NA	NA	NA	NA	NA	NA	NA	NA	NA	0.2032	NA	NA
MIMAT0019056	NA	NA	NA	0.3516	0.3674	NA	NA	NA	NA	NA	0.2525	NA	NA	NA	NA	NA	NA	NA	NA	0.2445	NA	0.5429	0.2728	NA	0.1814	NA	0.2517	NA	NA	NA	0.333024	NA	NA	NA	0.2185	NA	NA	NA	NA	NA	NA	NA	NA	0.1808	NA	NA	0.381281	0.373494	NA
MIMAT0026721	NA	NA	NA	NA	0.3674	NA	NA	NA	NA	NA	NA	NA	NA	NA	NA	NA	NA	NA	NA	NA	NA	NA	NA	NA	NA	NA	NA	NA	NA	NA	NA	NA	NA	NA	NA	NA	NA	NA	NA	NA	NA	NA	NA	NA	NA	NA	NA	NA	NA
MIMAT0026720	NA	0.534125	NA	0.3516	0.903037	NA	0.465597	2.97208	NA	0.4967	0.9681	0.7187	0.876815	NA	0.6202	0.1981	0.3711	0.535746	0.463872	0.2445	NA	0.753181	0.502128	0.572818	1.22638	1.04403	0.2517	NA	0.621834	0.511979	0.603389	NA	NA	0.2141	1.30534	0.648122	0.3161	0.555289	NA	NA	0.361945	0.2065	0.1992	0.1808	0.371899	0.566136	NA	0.373494	0.3976
MIMAT0005458	NA	1.53797	0.4622	4.73671	0.659972	0.2677	0.465597	5.92042	0.446	1.70494	0.46732	1.38637	0.1628	0.587415	NA	0.1981	NA	0.743762	NA	2.74937	0.753915	NA	NA	0.572818	0.487436	0.845206	NA	NA	0.958273	NA	0.603369	0.2888	0.4033	NA	0.575758	0.648122	0.5752	0.304195	0.557813	0.2701	4.58521	NA	0.374203	0.1808	NA	0.566136	0.2032	0.373494	1.37111
MIMAT0005459	NA	NA	NA	NA	NA	NA	NA	NA	NA	NA	NA	NA	NA	NA	NA	NA	NA	NA	NA	NA	NA	NA	NA	NA	NA	NA	NA	NA	NA	NA	NA	NA	NA	NA	NA	NA	NA	NA	NA	NA	0.131	NA	NA	NA	NA	NA	NA	NA	NA
MIMAT0020602	NA	NA	NA	NA	NA	NA	NA	NA	NA	NA	NA	NA	NA	NA	NA	NA	NA	NA	NA	NA	NA	NA	NA	NA	NA	NA	NA	NA	NA	NA	NA	NA	NA	NA	NA	NA	NA	NA	NA	NA	NA	NA	NA	NA	NA	NA	NA	NA	NA
MIMAT0018981	NA	NA	NA	NA	NA	NA	NA	NA	NA	NA	NA	NA	NA	NA	NA	NA	NA	NA	NA	NA	NA	0.2969	NA	NA	NA	NA	NA	NA	NA	NA	NA	NA	NA	NA	NA	NA	NA	NA	NA	NA	NA	NA	NA	NA	NA	NA	NA	NA	NA
MIMAT0005452	0.3514	NA	1.09275	0.3516	1.59927	1.69736	2.01691	3.09274	NA	1.01963	2.43253	1.55439	NA	NA	NA	NA	0.666009	0.5357	NA	NA	2.22046	4.2688	0.873935	0.722273	0.48742	2.15425	1.7168	NA	5.85764	0.615911	NA	0.529319	2.07901	NA	0.861961	0.2498	0.985358	1.19587	NA	NA	0.464939	3.61269	NA	0.341444	0.1979	2.12552	0.812514	1.22021	NA
MIMAT0005457	NA	NA	NA	0.3516	NA	NA	NA	0.7525	NA	NA	1.44434	0.4037	NA	NA	NA	NA	NA	0.2926	NA	NA	NA	0.2969	NA	NA	NA	0.3397	NA	NA	1.59488	NA	NA	NA	NA	NA	NA	NA	NA	NA	NA	0.2701	0.251089	0.547604	NA	NA	NA	NA	NA	NA	NA
MIMAT0000448	5.598	5.77798	4.28561	2.43704	4.90691	3.40387	5.30266	1.90255	2.60217	1.28588	2.15137	1.84111	2.94321	3.70739	1.3848	0.91322	5.42465	4.92851	5.76243	5.39212	4.52126	3.3418	3.94142	4.2626	5.35969	5.28411	3.65824	3.77248	4.03193	1.54463	2.53681	1.95638	3.65653	2.94874	3.51891	4.4078	3.85524	3.42492	4.97461	4.80607	3.44441	4.69643	3.07062	5.55654	2.71933	4.80768	2.30231	5.20583	1.94713
MIMAT0000449	6.36385	5.91283	6.68582	7.83871	7.91883	7.90194	6.79788	5.6911	5.92551	7.43274	8.17496	8.00215	6.86765	8.29527	8.08312	9.56154	5.41477	7.86015	7.77646	9.00656	7.94667	8.42018	6.44248	6.88223	7.12447	7.76579	6.95772	6.74183	7.9624	6.65086	6.65945	9.3356	6.721	5.22816	6.04228	7.97311	5.80395	7.84298	6.93696	5.60804	5.20683	7.67976	6.59873	6.72534	8.36234	8.32014	8.08607	6.74675	4.59489
MIMAT0000444	7.739	6.22078	8.29475	8.55242	7.47255	9.00752	8.90337	0.7525	8.29473	7.18639	6.72778	7.34942	8.39758	7.62043	8.02478	6.19536	7.79577	7.55849	8.0973	7.96953	8.02601	6.75993	7.72708	8.37254	7.28056	9.08022	8.31255	7.5073	8.51654	7.99036	6.60271	8.77187	8.566	7.13964	7.95911	8.38162	6.27927	8.67482	6.84522	7.82585	6.59725	8.32047	8.60457	6.79639	7.27109	8.55281	7.39347	7.25514	6.72849
MIMAT0000445	11.1188	9.54566	11.9855	11.3069	11.6862	12.0573	11.7623	7.87746	10.8562	10.261	10.8422	11.4347	11.4155	11.2915	11.3533	9.89213	11.1495	10.8088	11.611	11.6494	11.3993	12.0973	10.6165	11.8508	11.2084	12.329	11.854	11.8763	12.1502	10.657	9.18686	11.0667	12.0908	11.8932	11.3491	11.2635	8.74623	13.0309	10.4129	11.864	9.87735	11.7647	11.9555	10.6939	9.45109	12.6167	9.81018	10.5503	9.19909
MIMAT0000446	9.39232	9.91586	6.86939	9.13221	8.6166	6.87076	9.14917	11.4437	6.71892	7.05881	6.69358	8.30869	7.29836	7.81968	8.55429	3.62474	8.84405	8.46111	9.13466	9.65446	7.99662	7.05831	7.68246	7.0525	8.39672	8.53977	6.43257	8.47134	7.55452	7.39337	9.92152	7.57846	7.96378	8.012	8.56659	8.87182	9.10952	7.98808	7.94354	8.65886	7.32224	8.86945	7.77894	9.07545	8.77772	9.05527	7.85866	9.27544	7.77904
MIMAT0000447	7.92733	8.88146	5.20446	8.44117	7.57269	4.94355	7.92852	8.3129	4.6176	4.83459	6.06566	6.71813	5.3245	6.24585	6.12418	2.22662	7.52174	6.898	7.94245	8.56813	6.77101	6.17551	6.38971	5.45037	7.6251	7.9001	5.09425	8.09346	6.39673	5.40721	8.04792	5.81768	6.71212	6.61659	7.71487	7.28719	7.41577	7.24596	6.70538	8.53298	6.03232	7.20298	6.6119	7.69546	6.77838	7.72367	5.77725	8.02422	6.19052
MIMAT0000440	8.76889	7.63184	9.32766	7.97783	10.3754	8.68044	9.18308	10.7322	8.57794	8.42602	10.4772	9.14301	9.02783	9.24655	8.19573	9.11205	9.69809	8.25888	8.3877	9.80561	9.24239	9.84707	8.63953	8.91051	9.5635	8.97678	9.34072	8.84621	8.40176	6.41368	7.96044	8.16647	9.31219	8.8912	9.99552	8.80633	7.21869	9.79503	9.99764	9.59353	8.05128	8.69993	8.60514	8.79709	7.69507	9.58917	7.88382	8.26846	7.45302
MIMAT0000441	7.54387	8.20401	13.5356	11.8247	12.392	8.32894	12.6563	6.37777	8.54054	8.37332	8.9973	6.99503	10.4745	7.8325	6.61004	10.7655	6.74811	7.0054	7.99914	9.42918	9.4065	11.2652	12.2485	9.20149	11.6124	10.5111	11.3334	7.89937	9.83835	4.55955	12.3234	6.96694	11.3424	11.4464	13.1959	10.4418	10.6099	7.06054	8.64911	12.022	13.8037	11.4761	6.74722	9.68559	7.90783	10.902	8.50056	9.28025	7.31608
MIMAT0000442	NA	0.418028	4.81698	3.99106	3.32048	0.2677	3.59043	NA	0.446	0.2696	0.8197	0.977235	1.28313	0.587415	0.6202	2.31463	0.3711	NA	0.962085	0.943591	1.50089	2.2881	2.97627	0.857826	2.40256	1.86985	1.10005	1.06049	1.31139	0.146	3.66481	0.2888	2.07902	3.00725	4.29553	1.09369	2.7299	0.304195	1.12431	2.52002	4.34992	2.92915	NA	1.70926	0.527064	1.88398	0.812508	0.798027	0.3976
MIMAT0000443	8.38915	8.79284	9.52316	7.78195	9.30522	10.3985	8.94963	11.802	8.9133	9.08495	8.19961	10.6762	9.44798	9.76662	9.52212	8.29925	9.11223	9.91452	8.99419	10.0626	9.10224	9.74049	8.73426	9.45624	9.83322	8.7809	8.95788	8.77646	9.42383	8.71581	8.06061	8.39164	8.50196	9.04021	8.70527	9.01733	7.81932	9.56701	9.77671	9.93137	8.79249	9.10213	9.88857	9.98965	7.78146	9.40815	7.96988	8.96238	7.94615
MIMAT0030017	2.70399	0.1532	NA	2.1976	2.41951	0.4935	2.5263	4.42896	NA	1.01963	4.6604	1.70488	0.675735	1.4643	0.6202	4.54698	NA	0.2926	0.9621	0.798006	0.7539	3.83295	1.0292	0.9816	0.8511	3.7238	1.5389	1.4903	0.6219	0.4	0.1761	2.4415	1.1954	0.4006	0.7259	2.19896	0.5752	0.4351	NA	0.2701	1.0326	NA	0.3741	NA	0.794949	2.33246	1.7087	1.68544	0.3976
MIMAT0018982	NA	NA	NA	NA	NA	NA	NA	NA	NA	NA	NA	NA	NA	NA	NA	NA	NA	NA	NA	NA	NA	NA	NA	NA	NA	NA	NA	NA	NA	NA	NA	NA	NA	NA	NA	NA	NA	NA	NA	NA	NA	NA	NA	NA	NA	NA	NA	NA	NA
MIMAT0030018	NA	NA	NA	NA	NA	NA	NA	NA	NA	0.4967	0.654242	NA	0.1628	NA	NA	0.3723	0.3711	NA	NA	NA	NA	NA	NA	NA	0.1814	0.3397	NA	NA	0.1823	0.146	NA	NA	NA	NA	NA	NA	0.3161	NA	NA	0.2701	NA	NA	0.1992	NA	NA	NA	NA	NA	NA
MIMAT0030019	NA	1.36067	0.4622	2.57701	1.59931	0.2677	1.62988	4.64172	1.49125	2.75558	0.819679	0.718783	0.44188	0.810507	2.40514	0.372254	NA	NA	0.2505	1.4125	NA	1.49963	0.5022	NA	0.342518	1.37462	NA	1.06052	0.742887	2.48035	1.73839	1.35122	0.976396	1.08404	2.43669	1.09372	1.30433	1.74283	0.3057	0.866762	0.735864	1.42902	1.98567	0.617363	1.9781	0.365462	2.84826	0.529306	3.63511
MIMAT0026619	NA	NA	NA	NA	NA	NA	NA	NA	NA	NA	NA	NA	NA	NA	NA	NA	NA	NA	NA	NA	NA	NA	NA	NA	NA	0.3397	NA	NA	NA	0.146	0.1761	NA	NA	NA	0.2185	NA	NA	NA	NA	NA	NA	NA	0.1992	NA	0.1979	NA	NA	NA	NA
MIMAT0026618	0.3514	0.1532	NA	0.3516	NA	NA	NA	NA	NA	0.2696	0.2525	1.19623	0.1628	1.17414	0.6202	NA	NA	NA	0.463872	NA	NA	0.2969	NA	0.2172	NA	NA	NA	NA	NA	0.889108	0.1761	0.2888	NA	NA	NA	0.2498	NA	NA	NA	NA	NA	NA	NA	NA	NA	NA	NA	NA	NA
MIMAT0026615	3.93937	1.29632	5.68926	0.3516	NA	1.86828	0.2515	2.14513	3.04364	0.6928	0.2525	0.4037	0.442	4.45019	1.6547	1.46804	4.57793	NA	1.21872	6.20462	1.50095	NA	NA	2.74106	0.9545	0.614462	3.5684	0.4456	2.40899	0.889189	0.7216	2.03645	0.4033	NA	0.4081	NA	NA	0.4351	NA	0.8668	2.6822	NA	NA	NA	1.12163	2.12555	NA	2.23087	0.964942
MIMAT0026614	0.3514	NA	NA	NA	NA	0.2677	NA	0.7525	NA	NA	NA	NA	NA	NA	NA	0.1981	0.3711	NA	0.2505	0.2445	0.2972	NA	NA	NA	NA	NA	NA	NA	NA	NA	NA	NA	NA	NA	0.5757	NA	0.3161	NA	NA	NA	NA	NA	NA	0.1808	NA	NA	NA	0.1988	NA
MIMAT0026617	NA	0.641526	NA	NA	NA	0.2677	0.4656	NA	NA	NA	0.2525	NA	NA	NA	NA	NA	NA	NA	0.2505	0.453506	NA	NA	NA	0.2172	NA	0.3397	NA	NA	0.3442	NA	NA	0.529319	NA	0.4006	0.2185	NA	NA	0.4351	NA	0.694	0.131	0.2065	NA	0.3415	NA	0.2536	NA	NA	NA
MIMAT0026616	0.3514	0.741561	1.09283	1.2508	0.659972	0.2677	1.53827	0.7525	1.06127	0.865467	0.819732	NA	0.1628	0.587415	0.6202	0.1981	0.3711	0.2926	0.463872	1.9145	0.2972	1.61178	0.699952	0.572818	0.619117	2.06556	0.465942	1.96168	1.4601	NA	0.333024	0.2888	1.19542	0.565539	2.14837	1.09371	0.794837	1.26804	0.557813	0.693921	0.651065	0.547595	0.530255	0.737757	0.527153	1.10652	0.2032	0.66991	1.68762
MIMAT0026611	NA	NA	NA	NA	NA	NA	NA	NA	NA	NA	NA	NA	NA	NA	NA	NA	NA	NA	NA	NA	NA	NA	NA	NA	NA	NA	NA	NA	NA	NA	NA	NA	NA	NA	NA	NA	NA	NA	NA	NA	0.131	NA	NA	NA	NA	NA	NA	NA	NA
MIMAT0026610	NA	NA	NA	NA	NA	NA	NA	NA	NA	NA	NA	NA	NA	NA	NA	NA	NA	NA	NA	NA	NA	NA	NA	NA	NA	NA	NA	NA	NA	NA	NA	NA	NA	NA	NA	NA	NA	NA	NA	NA	NA	NA	NA	NA	NA	NA	NA	NA	NA
MIMAT0026613	NA	NA	0.4622	NA	NA	NA	NA	NA	NA	NA	NA	NA	NA	NA	NA	NA	NA	NA	NA	NA	0.7539	NA	NA	NA	NA	NA	NA	NA	NA	NA	NA	0.529319	NA	NA	NA	NA	NA	NA	NA	NA	NA	NA	NA	0.1808	NA	NA	NA	NA	NA
MIMAT0026612	NA	NA	NA	NA	0.6599	NA	NA	NA	NA	NA	NA	NA	NA	NA	NA	NA	NA	NA	NA	0.2445	NA	NA	NA	NA	0.4874	NA	NA	NA	NA	NA	NA	NA	0.4033	NA	0.408219	0.6481	NA	0.1601	NA	NA	NA	NA	NA	NA	NA	NA	NA	0.1988	NA
MIMAT0004813	1.68096	0.4179	0.4622	2.577	0.659972	NA	1.4404	NA	1.0613	0.865437	0.46732	0.4037	0.442	NA	1.0526	NA	0.9108	0.535746	1.0961	1.197	1.5009	0.936525	0.502128	0.2172	1.1413	1.51529	0.6524	1.49024	0.489685	0.146	1.20048	0.5293	0.4033	0.5656	1.2066	0.4626	1.88538	1.268	0.959	0.693993	0.361955	0.943583	0.917	1.52072	0.7949	0.822804	0.539793	1.0246	NA
MIMAT0004812	NA	NA	NA	NA	NA	NA	NA	NA	NA	NA	NA	NA	NA	NA	NA	NA	NA	NA	NA	NA	NA	NA	NA	NA	NA	NA	NA	NA	NA	NA	NA	NA	NA	NA	NA	NA	NA	NA	NA	NA	NA	NA	NA	NA	NA	NA	NA	NA	NA
MIMAT0004811	0.6337	1.00577	1.0927	0.3516	0.659972	0.2677	0.2515	2.3527	1.06136	0.2696	1.33911	NA	0.1628	1.00376	NA	0.1981	0.6661	NA	0.649715	0.453506	NA	1.09917	0.2728	NA	0.1814	1.21878	0.2517	0.4456	0.3442	NA	1.0275	0.529319	0.4033	0.2141	0.725893	0.648065	0.3161	0.3042	NA	NA	0.2511	0.547595	0.3741	0.341444	0.7949	0.656868	0.682591	0.373494	1.9471
MIMAT0004810	5.62246	6.50496	6.68582	7.13286	7.08282	6.15692	7.5459	5.22059	6.16285	6.10448	9.31358	7.76791	6.19083	6.50735	6.65687	5.94609	7.07756	5.86622	6.31979	7.42774	5.79906	7.01054	7.45314	6.13013	6.19934	7.11399	7.07249	7.53007	7.05262	4.76003	6.40478	6.24186	6.41238	6.93604	7.60897	6.40174	6.47472	6.31727	7.25265	6.73655	6.57296	6.57245	6.8152	6.53701	6.09738	7.38934	6.12869	7.72901	8.62619
MIMAT0004814	4.99499	4.74802	2.25581	6.0944	4.03301	2.28521	4.82904	5.29795	2.51343	2.71102	1.72024	2.2852	2.67285	3.2922	3.7392	0.372254	3.70355	4.02579	4.38613	5.61502	3.58273	3.40535	3.01391	2.80953	4.74729	4.85184	2.14744	4.3087	3.20441	2.39521	5.18227	3.54065	3.98507	2.12438	4.31933	3.994	4.87844	4.49025	3.73021	5.0764	2.82451	4.81158	3.48719	5.03464	3.87479	4.58887	3.72806	3.8819	3.59777
MIMAT0004819	0.8698	1.74502	0.4622	1.91051	2.63692	1.39578	1.87428	5.55062	2.31766	2.10018	2.32658	2.6243	1.59985	1.91243	1.65468	1.02178	1.3027	1.48476	0.962053	2.17267	2.14786	1.61171	1.96877	0.857786	1.38283	1.76105	1.10001	1.6651	1.93694	0.712919	1.73841	1.07593	2.54539	1.95615	2.8174	1.43364	2.14709	1.93224	1.74836	2.57099	2.47585	1.58514	1.39417	1.52071	1.68031	2.24738	2.30232	2.62569	1.82324
MIMAT0004497	4.62748	3.36399	5.38477	3.21385	4.28983	4.68223	5.23863	1.61073	3.95341	3.13884	3.11262	4.63756	4.93704	4.63661	3.3407	4.24491	5.14259	4.97051	4.20517	5.85942	5.28457	4.74504	3.08643	5.24324	5.90249	5.22384	4.50628	4.25503	5.19242	2.80008	3.29682	4.17499	4.36969	4.49833	4.73701	5.43772	3.94974	5.73392	5.91242	5.2813	2.66069	5.3899	4.31808	5.61276	3.18342	4.44993	3.01946	3.32389	2.5261
MIMAT0004496	1.40857	1.48127	2.00755	1.40905	2.06695	0.2677	2.78738	4.23274	0.446	1.15887	2.62381	3.50229	0.4419	0.8106	1.0526	1.12278	2.43314	1.08691	0.962053	1.76578	1.61302	2.69667	1.41436	3.42587	0.8511	2.23781	2.14747	1.821	2.58126	NA	0.603389	0.5293	1.1954	0.2141	1.56653	1.8665	1.30436	3.84577	1.84628	1.40454	0.816	1.65729	2.4825	1.70919	0.1979	2.38643	0.381281	0.798105	0.3976
MIMAT0004495	5.90072	3.97012	5.89547	3.80415	5.97864	5.13994	5.8847	2.69538	5.11655	4.73794	3.596	4.59963	4.95373	5.63676	4.71395	4.34236	5.86313	4.75917	5.31043	5.2312	5.58883	4.69503	4.34765	4.7631	5.85656	6.00422	4.67718	4.08089	4.78343	2.86478	4.8855	5.36918	5.97547	3.06361	4.54826	6.05321	3.75408	5.58316	5.98947	4.47308	2.84375	5.7407	4.02203	6.07381	4.40172	4.68905	3.7766	4.67412	3.93359
MIMAT0004494	11.294	12.5129	11.5762	10.7735	11.7626	9.27686	13.6382	9.16677	9.84514	11.7861	13.6607	11.0274	10.8369	9.80156	9.60706	11.1817	11.5414	10.7166	11.287	12.5815	11.3087	12.8952	11.8434	11.7996	11.0409	13.4042	11.8381	12.5989	12.1527	7.27336	12.006	9.92689	13.0342	11.1655	12.2177	12.1156	11.1964	13.0967	11.0887	12.6392	10.8684	12.0684	11.2581	11.1907	10.8259	12.0785	12.5104	12.6735	12.6818
MIMAT0022736	NA	NA	NA	NA	0.3674	NA	NA	NA	NA	NA	0.46732	NA	NA	NA	NA	NA	NA	NA	NA	NA	NA	NA	NA	0.405938	NA	NA	NA	NA	NA	NA	NA	NA	NA	NA	NA	NA	NA	0.1601	NA	NA	0.131	NA	NA	0.1808	NA	NA	NA	NA	NA
MIMAT0022737	NA	NA	NA	NA	NA	NA	NA	NA	NA	NA	NA	0.4037	NA	NA	NA	NA	NA	NA	NA	NA	NA	NA	NA	NA	NA	NA	NA	NA	NA	NA	NA	NA	NA	NA	NA	NA	NA	NA	NA	NA	NA	NA	NA	NA	NA	NA	NA	NA	NA
MIMAT0004491	3.3753	2.64706	5.18956	2.10814	2.63693	3.43141	3.31478	1.9025	4.20088	1.51058	4.23159	2.37774	2.80206	2.46564	2.07818	3.11355	4.4287	2.82177	2.65751	3.06804	3.34354	4.38375	3.12133	2.59361	2.1209	3.07613	2.57413	2.9095	4.30199	1.25381	3.2185	1.68533	4.36968	3.42768	3.14525	2.92903	0.7948	3.72292	3.44774	5.74724	3.00623	2.18243	2.72785	2.72416	1.80693	3.22673	3.12329	2.59076	1.94709
MIMAT0026472	1.55118	2.59456	3.43532	2.70459	4.31108	3.58638	4.10328	NA	1.96283	1.5106	4.83487	2.08018	3.13204	2.25391	1.88193	0.1981	2.2672	2.72701	2.78204	3.87423	2.59287	4.99289	1.29699	3.40389	3.11054	3.63409	2.78828	2.31635	4.53785	0.969857	2.12932	1.47139	3.07342	1.89537	4.56829	2.56431	1.30439	2.77975	3.09614	5.26596	3.92255	2.83895	2.66191	2.20322	0.9123	4.0336	1.89629	5.6241	0.3976
MIMAT0026479	0.633753	0.1532	NA	NA	0.6599	0.86047	0.651989	1.2445	NA	1.1589	0.2525	0.4037	0.309078	0.81058	NA	0.527631	0.3711	1.08689	0.2505	0.453506	1.10027	NA	NA	0.405938	0.954459	0.614462	0.4659	NA	0.1823	NA	NA	0.2888	NA	0.2141	0.725893	0.812381	0.575236	0.3042	0.959035	NA	0.651107	0.547595	NA	0.1808	1.02082	0.566142	NA	0.373494	NA
MIMAT0026478	0.6337	NA	NA	NA	NA	0.6886	0.2515	NA	NA	NA	NA	0.4037	0.1628	NA	NA	NA	NA	NA	NA	NA	NA	NA	NA	0.2172	NA	0.3397	NA	NA	NA	0.511979	NA	NA	NA	0.2141	0.2185	NA	NA	0.555289	NA	NA	NA	NA	NA	NA	NA	0.1324	0.2032	NA	NA
MIMAT0004499	NA	0.1532	0.8116	NA	1.11102	1.50347	0.9651	NA	NA	0.865437	2.48277	1.7049	0.6758	NA	NA	1.12282	0.6661	0.2926	1.0961	1.07588	0.7539	1.37815	0.502128	0.7223	0.9545	1.2187	0.6524	NA	1.38765	0.400007	0.603389	0.915694	0.4033	0.713681	0.9862	1.32897	0.3161	1.268	0.959	1.0212	0.561	0.823266	0.7992	0.848913	0.527064	0.566136	0.682591	0.67	NA
MIMAT0004498	0.3514	0.1532	NA	1.07295	0.659972	NA	0.465597	1.61073	0.786192	NA	1.95185	0.4037	0.1628	0.587415	NA	NA	0.3711	NA	NA	0.453506	NA	0.5429	0.502128	0.2172	NA	0.3397	NA	NA	NA	0.400007	0.47452	0.529319	0.718139	0.400494	2.34683	0.2498	0.794806	0.666063	0.3057	0.866889	0.735859	0.2065	0.67098	0.3415	0.371899	0.253664	1.0418	0.1988	NA
MIMAT0019208	1.79997	1.42229	0.811703	3.96577	3.55211	2.70172	1.94734	5.48601	0.446	2.16769	3.788	3.7985	1.95145	2.25389	2.40518	1.86781	1.86404	1.79622	2.14184	2.89975	2.5371	3.63494	1.71798	1.84768	2.47385	3.4002	2.01767	2.68442	3.4195	1.11872	1.20044	1.22015	2.95844	1.76564	2.67694	2.31314	1.56543	1.69135	3.09615	3.30078	5.56937	2.27704	2.03859	2.11708	1.38783	3.07046	1.41349	2.99009	0.3976
MIMAT0019209	NA	NA	NA	NA	NA	NA	NA	NA	NA	NA	NA	NA	NA	NA	NA	NA	NA	NA	NA	NA	NA	NA	NA	NA	NA	NA	NA	NA	NA	NA	NA	NA	NA	NA	NA	NA	NA	NA	NA	NA	0.131	NA	NA	NA	NA	NA	NA	NA	NA
MIMAT0004657	2.82123	4.84679	6.748	4.9578	5.76449	4.78188	6.43162	5.87066	5.07062	5.35271	7.46244	5.5399	4.94263	4.32911	5.03083	3.49886	5.4539	4.34596	4.01526	4.56754	3.78781	7.03587	5.69464	4.6833	3.13276	4.95416	4.79081	NA	5.10477	3.1159	4.02841	3.54063	6.00472	6.44439	5.94988	4.15571	4.34709	6.37962	5.40248	5.77464	5.07874	5.3846	6.01126	2.80905	3.60542	5.52887	5.1614	5.99884	5.65837
MIMAT0019200	NA	NA	NA	NA	0.3674	NA	NA	NA	NA	NA	NA	NA	0.1628	0.3234	NA	NA	NA	0.2926	NA	NA	NA	NA	NA	NA	NA	0.6145	NA	NA	NA	0.146	NA	NA	NA	0.2141	NA	NA	NA	NA	NA	NA	NA	NA	NA	NA	NA	0.1324	NA	NA	NA
MIMAT0019201	NA	0.4179	NA	0.634	0.3674	NA	0.2515	0.7525	0.446	NA	0.8197	0.4037	0.3091	0.3234	NA	0.372254	0.3711	0.2926	0.2505	0.4534	0.2972	0.2969	NA	0.2172	0.3425	NA	0.4659	NA	0.742948	NA	NA	NA	NA	0.5656	NA	0.2498	0.3161	0.1601	0.772256	0.4976	0.963875	NA	NA	NA	0.1979	NA	0.3813	0.529306	NA
MIMAT0019202	0.6337	0.1532	NA	NA	NA	0.6886	0.2515	0.7525	NA	NA	NA	0.4037	NA	NA	NA	0.667927	0.666009	0.535746	NA	0.453506	NA	NA	NA	0.572818	NA	1.04405	0.2517	0.4456	0.1823	0.399983	0.1761	NA	NA	0.400494	NA	0.462664	0.575236	0.1601	0.3057	1.28776	0.131	0.2065	NA	1.22355	NA	NA	0.2032	NA	NA
MIMAT0019203	NA	NA	NA	NA	NA	NA	NA	NA	NA	NA	NA	NA	NA	NA	NA	NA	NA	NA	NA	NA	NA	NA	NA	NA	NA	NA	NA	0.4456	NA	NA	NA	NA	NA	NA	NA	NA	NA	NA	NA	NA	NA	NA	NA	NA	NA	NA	NA	NA	NA
MIMAT0019204	NA	NA	NA	NA	NA	NA	NA	NA	NA	NA	NA	NA	NA	NA	NA	NA	NA	NA	NA	NA	NA	0.2969	NA	NA	NA	NA	NA	NA	0.1823	NA	NA	NA	NA	NA	NA	NA	NA	0.1601	NA	NA	NA	NA	NA	NA	NA	NA	NA	NA	NA
MIMAT0004658	1.0725	0.641612	NA	0.3516	1.96346	0.4935	1.62986	NA	NA	0.2696	2.15131	0.7187	0.1628	NA	0.6202	1.30574	0.6661	0.5357	0.649739	0.4534	1.24652	1.37812	0.874005	1.09571	0.954491	1.64334	1.71671	1.06052	0.958248	NA	NA	NA	1.1954	0.565633	NA	1.21615	NA	0.4352	0.5577	0.4976	0.651073	0.823272	NA	0.737791	NA	1.44886	0.381281	1.2203	NA
MIMAT0019206	NA	NA	NA	0.3516	NA	0.2677	0.2515	1.24453	NA	NA	0.2525	NA	NA	0.3234	0.6202	0.1981	NA	NA	NA	0.2445	NA	NA	NA	NA	0.1814	NA	NA	0.4456	NA	NA	NA	NA	NA	0.400494	0.2185	NA	NA	NA	0.3057	NA	0.2511	NA	0.1992	0.48603	NA	0.365462	NA	NA	NA
MIMAT0019207	NA	NA	NA	0.3516	NA	0.493416	NA	NA	NA	NA	NA	0.4037	0.1628	NA	NA	NA	NA	NA	0.2505	0.2445	NA	NA	NA	0.2172	NA	NA	NA	2.97745	0.1823	NA	NA	NA	NA	0.4006	NA	NA	NA	NA	NA	NA	NA	0.2065	NA	0.48603	NA	NA	NA	NA	NA
MIMAT0015006	NA	NA	NA	NA	NA	NA	NA	NA	NA	NA	NA	NA	NA	NA	NA	NA	NA	NA	NA	NA	NA	NA	0.2728	NA	NA	NA	NA	0.4456	0.1823	NA	NA	NA	NA	NA	NA	NA	NA	NA	NA	NA	NA	0.2065	NA	NA	NA	NA	NA	NA	NA
MIMAT0015007	NA	NA	NA	NA	NA	NA	NA	NA	NA	NA	NA	NA	NA	0.3234	NA	NA	0.3711	NA	NA	NA	0.2972	NA	NA	NA	NA	NA	0.4659	NA	0.1823	NA	NA	NA	NA	NA	NA	NA	NA	NA	NA	NA	0.131	NA	NA	NA	NA	NA	NA	NA	NA
MIMAT0015004	NA	NA	NA	NA	NA	NA	NA	NA	NA	NA	NA	NA	NA	0.3234	NA	NA	NA	NA	NA	NA	NA	NA	NA	NA	NA	NA	NA	NA	NA	NA	NA	NA	NA	NA	NA	NA	NA	NA	NA	NA	NA	NA	NA	NA	NA	NA	NA	NA	NA
MIMAT0015005	NA	NA	NA	NA	NA	NA	0.4656	NA	NA	NA	0.654242	NA	NA	NA	0.6202	0.372254	NA	NA	NA	NA	0.2972	NA	NA	NA	0.1814	0.3397	NA	NA	0.1823	NA	NA	NA	0.4033	NA	NA	NA	NA	NA	NA	NA	0.131	NA	NA	NA	NA	0.1324	0.2032	NA	NA
MIMAT0015002	NA	NA	NA	NA	NA	NA	0.465597	NA	NA	NA	NA	NA	NA	NA	NA	NA	0.3711	NA	0.2505	NA	NA	0.2969	0.874005	NA	0.342518	0.3397	NA	NA	0.3442	NA	NA	NA	NA	NA	NA	NA	NA	NA	NA	NA	NA	NA	0.1992	NA	NA	NA	NA	0.1988	0.964942
MIMAT0015003	0.869788	0.291682	NA	NA	1.11105	0.2677	1.22226	NA	NA	0.2696	2.32661	0.7187	0.442	0.587415	NA	0.3723	1.74288	0.2926	0.649715	1.19695	0.937503	1.09924	0.873893	0.857758	0.954432	1.64342	0.817539	1.49029	0.621834	NA	0.1761	0.2888	0.718139	0.848072	0.4081	0.812381	0.575236	0.769015	0.3057	NA	0.891833	0.69201	0.1992	0.48603	NA	0.899077	0.381281	0.373494	0.3976
MIMAT0015001	NA	NA	NA	NA	NA	NA	NA	NA	NA	NA	NA	NA	NA	0.3234	NA	NA	NA	0.2926	NA	NA	NA	NA	NA	NA	NA	NA	NA	NA	NA	0.146	NA	NA	NA	NA	NA	NA	NA	NA	NA	NA	NA	NA	NA	NA	NA	NA	0.2032	0.1988	0.3976
MIMAT0015008	0.3514	NA	NA	0.3516	0.3674	NA	0.465597	NA	NA	NA	1.87868	NA	NA	NA	NA	0.372254	0.3711	0.5357	NA	0.4534	0.753915	NA	0.2728	NA	0.1814	0.845206	0.2517	0.4456	0.1823	NA	0.603389	NA	NA	NA	NA	0.2498	0.3161	NA	0.3057	NA	0.131	0.3871	0.530163	0.486	0.527064	0.2536	0.2032	0.1988	0.3976
MIMAT0015009	NA	NA	NA	0.3516	0.659972	NA	0.465597	NA	0.446	NA	0.2525	0.4037	0.1628	0.3234	NA	NA	NA	0.2926	NA	NA	0.2972	0.9365	0.2728	NA	NA	NA	0.2517	NA	NA	NA	NA	NA	0.7181	NA	0.575758	NA	NA	NA	NA	NA	0.362	NA	0.1992	0.1808	0.1979	NA	NA	0.798109	NA
MIMAT0019047	NA	0.1532	NA	NA	NA	NA	0.2515	NA	NA	0.2696	0.2525	1.19635	NA	0.3234	NA	NA	NA	NA	0.2505	0.2445	0.2972	NA	NA	NA	NA	NA	NA	0.4456	0.1823	0.278573	NA	0.529319	0.4033	NA	0.575864	NA	0.575236	NA	NA	0.693921	0.362	0.69201	0.3741	NA	NA	0.253664	0.2032	0.798105	NA
MIMAT0022282	NA	NA	NA	NA	NA	NA	NA	NA	NA	NA	NA	NA	NA	NA	NA	NA	NA	NA	NA	NA	NA	NA	NA	NA	NA	NA	NA	NA	NA	NA	NA	NA	NA	NA	NA	NA	NA	NA	NA	NA	NA	NA	NA	NA	NA	NA	NA	NA	NA
MIMAT0022283	NA	NA	NA	NA	NA	NA	NA	NA	NA	NA	NA	NA	NA	0.3234	NA	NA	NA	NA	NA	NA	NA	NA	NA	NA	NA	NA	NA	NA	NA	NA	NA	NA	NA	NA	NA	NA	0.3161	NA	NA	NA	NA	NA	NA	0.1808	NA	NA	NA	0.373494	NA
MIMAT0022280	NA	NA	NA	0.3516	0.3674	NA	NA	NA	NA	NA	0.2525	0.4037	NA	0.3234	NA	0.1981	NA	NA	NA	NA	NA	NA	NA	NA	0.1814	0.614462	NA	0.7856	NA	NA	NA	0.2888	NA	0.2141	0.2185	NA	NA	NA	NA	NA	0.2511	0.2065	NA	0.1808	NA	NA	NA	NA	NA
MIMAT0022281	NA	NA	NA	NA	NA	NA	NA	NA	NA	NA	NA	NA	NA	NA	NA	NA	NA	NA	NA	NA	NA	NA	NA	NA	NA	NA	NA	NA	NA	NA	NA	NA	NA	NA	NA	NA	NA	NA	NA	NA	NA	NA	NA	NA	NA	NA	NA	NA	NA
MIMAT0022287	1.07259	1.53807	1.09275	0.870137	3.14244	1.0141	1.87428	NA	0.7863	1.40262	2.9791	0.977166	1.95145	1.0038	NA	3.72456	0.6661	1.23204	1.86979	1.30877	1.50089	2.6967	1.29698	2.14122	1.93118	2.4629	0.9656	1.66508	1.5291	1.31685	2.32894	3.01638	0.718139	2.01442	1.3977	2.07506	0.7948	0.9552	0.7723	3.14158	3.02311	1.97219	1.12718	1.13859	1.21599	2.46394	1.49311	3.34502	0.965
MIMAT0022284	NA	NA	NA	NA	NA	NA	NA	NA	NA	NA	NA	NA	NA	NA	NA	NA	NA	NA	NA	NA	NA	NA	NA	NA	NA	NA	NA	NA	NA	NA	NA	NA	NA	NA	NA	NA	NA	NA	NA	NA	NA	NA	NA	NA	NA	NA	NA	NA	NA
MIMAT0022285	NA	0.291682	NA	NA	NA	NA	NA	NA	NA	NA	NA	0.4037	0.1628	NA	NA	NA	NA	NA	NA	NA	NA	NA	NA	NA	NA	NA	NA	NA	NA	NA	0.1761	NA	NA	NA	0.725945	NA	NA	NA	NA	NA	NA	NA	NA	NA	NA	NA	NA	NA	NA
MIMAT0022288	NA	NA	NA	0.3516	0.3674	NA	NA	NA	NA	NA	NA	NA	NA	NA	NA	NA	NA	0.2926	NA	NA	NA	NA	NA	NA	0.1814	NA	NA	NA	NA	NA	NA	0.2888	NA	NA	NA	0.2498	NA	NA	NA	0.2701	NA	NA	NA	NA	NA	NA	NA	NA	0.3976
MIMAT0022289	NA	NA	NA	NA	NA	NA	NA	NA	NA	0.2696	NA	NA	NA	NA	NA	NA	NA	NA	NA	NA	NA	NA	NA	NA	NA	NA	NA	NA	NA	NA	NA	NA	NA	NA	NA	NA	NA	NA	NA	NA	NA	NA	NA	NA	NA	NA	NA	NA	NA
MIMAT0026737	NA	NA	NA	NA	NA	NA	NA	NA	NA	NA	NA	NA	NA	NA	NA	NA	NA	NA	NA	NA	NA	NA	NA	NA	NA	NA	NA	NA	NA	0.146	NA	NA	NA	NA	NA	NA	0.3161	NA	NA	NA	NA	NA	NA	NA	NA	NA	NA	0.1988	NA
MIMAT0022726	2.87641	2.7706	2.25582	2.10813	4.1787	2.55925	3.80224	6.87521	2.20883	2.79884	3.95745	3.98657	2.50076	2.46564	2.40515	2.47602	3.45613	2.45852	2.26076	4.79568	2.53713	4.75729	2.63327	1.56042	2.96958	4.85179	2.32259	3.84692	4.91166	0.615917	2.95427	2.03655	3.27912	1.62298	5.33629	2.85557	3.10326	4.09399	3.94441	5.41958	4.16355	2.80758	2.75977	3.23448	2.13122	3.61408	2.16311	2.6932	2.52608
MIMAT0027355	NA	NA	NA	NA	0.3674	NA	0.2515	NA	NA	NA	NA	NA	NA	0.3234	NA	NA	0.3711	NA	NA	NA	0.2972	0.543004	0.2728	NA	NA	0.3397	0.2517	0.4456	NA	NA	NA	NA	NA	NA	NA	0.2498	NA	0.555293	0.3057	0.2701	0.131	NA	NA	0.1808	NA	0.1324	NA	0.1988	NA
MIMAT0028109	NA	NA	NA	NA	NA	NA	NA	NA	NA	NA	NA	NA	NA	NA	NA	NA	NA	NA	NA	NA	NA	NA	NA	NA	NA	NA	NA	NA	NA	NA	NA	NA	NA	NA	NA	NA	NA	NA	NA	NA	NA	NA	NA	NA	NA	NA	NA	NA	NA
MIMAT0005586	NA	NA	NA	NA	NA	NA	NA	NA	NA	NA	NA	NA	NA	NA	NA	NA	NA	NA	NA	NA	NA	NA	NA	NA	NA	NA	NA	NA	NA	NA	NA	NA	NA	NA	NA	NA	NA	NA	NA	NA	NA	NA	NA	NA	NA	NA	NA	NA	0.708964
MIMAT0027525	NA	0.1532	NA	NA	NA	NA	0.2515	NA	NA	NA	0.4673	NA	NA	NA	NA	0.1981	NA	NA	NA	NA	0.2972	0.7531	NA	NA	NA	NA	NA	NA	0.1823	NA	NA	NA	0.4033	0.2141	NA	0.4626	NA	NA	NA	NA	NA	NA	0.3741	NA	0.1979	NA	NA	0.3735	NA
MIMAT0005584	0.869743	0.417953	NA	0.3516	1.11102	0.493416	0.651989	NA	NA	1.01961	2.21215	0.4037	0.5635	0.587415	NA	1.54282	0.910745	0.743762	0.649739	1.91457	1.10021	1.4997	0.502128	0.572818	1.82607	1.04405	0.652443	0.78556	1.71816	0.146	0.333024	NA	0.976396	0.565633	0.72585	0.2498	NA	0.769012	1.27255	1.02116	2.70345	0.2065	0.530255	0.341444	0.1979	0.899118	NA	0.3735	0.3976
MIMAT0024597	NA	NA	NA	NA	NA	NA	NA	NA	NA	NA	NA	NA	NA	NA	NA	NA	NA	NA	NA	NA	NA	NA	NA	NA	NA	NA	NA	NA	NA	NA	NA	NA	NA	NA	NA	NA	NA	NA	NA	NA	NA	NA	NA	NA	NA	NA	NA	NA	NA
MIMAT0019738	0.6337	0.1532	0.4622	0.3516	0.3674	NA	NA	1.6107	NA	NA	2.79257	0.4037	0.1628	0.587415	NA	NA	0.6661	0.925476	NA	0.635936	0.2972	0.2969	NA	0.4059	0.48742	0.6145	NA	NA	1.14562	0.146	0.333024	NA	0.4033	0.2141	0.986207	0.2498	0.5752	0.1601	0.959035	0.694	1.43888	0.3871	0.1992	0.1808	0.371899	0.1324	NA	0.915758	NA
MIMAT0019739	NA	0.1532	NA	NA	0.903098	NA	NA	NA	NA	NA	0.654242	NA	NA	NA	NA	0.1981	NA	NA	NA	NA	NA	0.2969	0.2728	NA	0.1814	NA	0.2517	NA	NA	NA	NA	NA	NA	NA	0.5757	0.2498	NA	0.4351	0.3057	0.2701	0.362	NA	0.1992	NA	NA	0.1324	NA	0.373494	NA
MIMAT0019734	NA	NA	NA	NA	NA	NA	NA	NA	NA	NA	NA	NA	NA	NA	NA	NA	NA	NA	NA	NA	NA	NA	NA	NA	NA	NA	NA	NA	NA	NA	NA	NA	NA	NA	NA	NA	NA	NA	NA	NA	NA	NA	NA	NA	NA	NA	NA	NA	NA
MIMAT0027520	NA	NA	NA	NA	NA	NA	NA	NA	0.446	NA	0.2525	NA	NA	0.3234	NA	NA	NA	NA	NA	NA	NA	NA	NA	NA	NA	NA	NA	NA	NA	NA	NA	NA	NA	NA	NA	NA	NA	NA	NA	NA	NA	NA	NA	NA	NA	NA	NA	NA	NA
MIMAT0019736	NA	NA	NA	NA	NA	NA	NA	NA	NA	NA	NA	NA	NA	NA	NA	NA	NA	NA	NA	NA	NA	NA	NA	NA	NA	NA	NA	NA	NA	NA	NA	NA	NA	NA	NA	NA	NA	NA	NA	NA	NA	NA	NA	NA	NA	NA	NA	NA	NA
MIMAT0019737	NA	0.1532	0.4622	0.3516	0.6599	NA	0.2515	NA	NA	NA	NA	NA	NA	0.5875	NA	0.668	NA	NA	0.2505	0.635936	0.2972	NA	0.700015	NA	NA	0.3397	0.4659	NA	0.1823	NA	NA	NA	0.4033	NA	0.7259	0.2498	0.3161	0.555197	0.3057	0.693993	0.735884	NA	NA	0.486	0.1979	0.3655	NA	0.373494	NA
MIMAT0019730	NA	NA	NA	NA	NA	NA	NA	NA	NA	NA	NA	NA	NA	NA	NA	NA	NA	NA	NA	NA	NA	NA	NA	NA	NA	NA	NA	NA	NA	NA	NA	NA	NA	NA	NA	NA	NA	NA	NA	0.2701	NA	NA	NA	NA	NA	NA	NA	NA	NA
MIMAT0019731	2.704	3.8742	2.7364	4.89226	4.20161	3.89402	3.1697	1.6107	1.6662	2.79885	2.08782	1.8411	3.8582	5.3737	2.9969	0.9133	7.21212	3.4152	2.56808	6.49485	2.4791	2.288	2.36827	3.2149	5.36435	3.63408	2.6196	3.73379	4.52943	3.83939	2.21249	3.59453	2.7666	2.2266	4.872	4.42059	3.85523	3.50166	3.50883	7.53691	6.45442	3.12	2.5928	3.21387	2.03096	3.71259	2.6188	2.0367	2.81344
MIMAT0019732	NA	NA	NA	NA	NA	NA	NA	NA	NA	NA	NA	NA	NA	NA	NA	NA	NA	0.2926	NA	NA	NA	NA	NA	NA	NA	NA	NA	NA	NA	NA	NA	NA	NA	NA	NA	NA	NA	NA	NA	NA	NA	NA	NA	NA	NA	NA	NA	NA	NA
MIMAT0027521	NA	NA	0.4622	NA	0.903098	NA	0.2515	0.7525	0.446	0.2696	0.4673	0.4037	NA	0.3234	0.6202	0.372254	NA	NA	NA	0.4534	0.2972	NA	0.5022	NA	0.1814	1.21881	0.4659	NA	NA	NA	0.1761	NA	0.4033	0.565633	NA	NA	0.3161	0.1601	0.557813	NA	NA	NA	0.917	0.486	0.1979	NA	NA	0.373494	NA
MIMAT0027522	NA	NA	NA	NA	NA	NA	NA	0.7525	NA	0.2696	NA	0.718783	NA	NA	0.6202	0.527672	NA	NA	NA	NA	NA	NA	NA	NA	NA	0.3397	NA	NA	NA	NA	NA	NA	NA	0.2141	NA	NA	NA	NA	NA	NA	NA	NA	NA	NA	NA	NA	NA	NA	NA
MIMAT0018005	NA	NA	NA	NA	NA	NA	NA	NA	NA	NA	NA	NA	NA	NA	NA	NA	NA	NA	NA	NA	NA	NA	NA	NA	NA	NA	NA	NA	NA	NA	NA	NA	NA	NA	NA	NA	NA	0.1601	NA	NA	NA	NA	NA	NA	NA	NA	NA	NA	NA
MIMAT0018004	NA	NA	NA	0.3516	0.3674	0.2677	NA	1.6107	0.446	NA	NA	1.3864	0.309078	0.5875	NA	NA	NA	0.743723	0.2505	NA	0.2972	0.2969	NA	NA	0.1814	NA	NA	0.78556	NA	NA	0.1761	0.2888	NA	NA	NA	0.6481	NA	0.3042	NA	NA	0.131	0.38711	0.1992	0.3415	NA	0.1324	0.2032	NA	NA
MIMAT0018006	NA	0.1532	NA	NA	NA	NA	NA	0.7525	NA	NA	NA	NA	NA	NA	NA	NA	NA	NA	0.2505	NA	NA	NA	NA	NA	NA	NA	NA	NA	NA	NA	NA	NA	NA	NA	NA	NA	NA	0.1601	NA	NA	NA	NA	0.1992	NA	NA	NA	NA	NA	NA
MIMAT0018001	0.3514	NA	0.4622	0.3516	NA	NA	0.2515	0.7525	0.446	0.496664	1.10268	NA	NA	0.587415	NA	0.3723	NA	NA	NA	0.635936	0.2972	0.2969	0.2728	0.2172	NA	NA	NA	NA	0.1823	NA	NA	0.2888	NA	0.4006	0.575758	0.4626	NA	NA	0.557813	NA	1.38733	NA	NA	0.486	0.1979	0.469271	NA	0.669999	0.3976
MIMAT0018000	3.07831	1.64529	NA	1.07301	0.3674	NA	1.5383	1.2445	1.29229	2.02938	0.4673	1.3864	1.4183	0.81058	NA	0.1981	0.6661	0.743723	0.814327	0.453506	0.7539	1.61177	0.5022	0.722349	0.619084	0.3397	0.652407	NA	0.6219	0.278573	1.11662	0.735411	0.7181	0.4006	0.861961	0.812412	0.7948	0.4352	0.3057	1.02115	0.251089	0.823266	0.91701	0.1808	1.6125	0.365462	0.812522	0.3735	0.964942
MIMAT0018003	NA	NA	NA	NA	NA	NA	NA	NA	NA	NA	NA	NA	NA	NA	NA	NA	NA	NA	NA	NA	NA	NA	NA	NA	NA	NA	NA	NA	NA	NA	NA	NA	NA	NA	NA	NA	NA	NA	NA	NA	NA	NA	0.1992	NA	NA	NA	NA	0.1988	NA
MIMAT0018002	NA	NA	NA	NA	NA	NA	NA	NA	NA	NA	NA	NA	NA	NA	NA	NA	NA	NA	NA	NA	NA	NA	NA	NA	NA	NA	NA	NA	NA	NA	NA	NA	NA	NA	NA	NA	NA	NA	NA	NA	NA	NA	NA	NA	NA	NA	0.2032	NA	NA
MIMAT0001545	3.0304	3.44041	3.53268	1.25083	3.516	4.473	3.59045	NA	2.51339	3.59642	1.44429	0.977235	3.15151	3.65083	1.38475	1.80844	3.67072	3.47473	3.19435	4.45061	3.55491	3.37394	1.29693	3.1102	4.91685	4.78389	5.20277	5.6396	5.3244	0.712822	3.83198	1.07593	3.23043	3.51109	2.91445	4.51901	2.36851	2.65094	4.83842	4.90853	2.39993	3.61268	3.68276	5.2062	2.51193	3.38106	1.41349	3.86733	2.35767
MIMAT0001541	1.25037	3.24973	0.8116	0.3516	1.11105	1.27938	0.4656	NA	0.786192	1.87621	1.80166	2.08014	4.21448	NA	1.65464	1.21722	0.3711	NA	1.79289	4.88858	4.54973	NA	NA	2.47216	0.1814	2.06551	0.2517	0.4456	0.8546	0.511979	1.27979	2.80395	1.38549	0.2141	2.60123	3.75231	2.14708	2.17647	5.11871	1.02113	0.361955	4.87346	1.22174	1.70928	NA	1.22985	2.84825	2.23089	0.965
MIMAT0019846	0.3514	NA	NA	NA	NA	NA	0.2515	NA	NA	NA	NA	NA	0.1628	NA	NA	NA	NA	NA	NA	NA	NA	NA	NA	NA	NA	NA	NA	NA	0.1823	NA	0.4745	NA	NA	NA	NA	NA	NA	NA	NA	NA	0.131	NA	0.1992	NA	NA	0.1324	NA	NA	NA
MIMAT0019847	NA	0.4179	0.8116	NA	NA	NA	0.2515	NA	0.786192	0.496664	NA	0.7187	0.1628	0.3234	NA	NA	0.3711	NA	0.2505	0.2445	NA	1.09922	0.2728	0.2172	0.1814	0.6145	NA	0.4456	0.621774	0.2786	0.1761	NA	0.4033	0.2141	0.4081	0.4626	NA	0.5552	0.3057	0.2701	0.2511	0.2065	0.530163	NA	0.912159	0.365462	0.682591	1.0246	NA
MIMAT0019844	NA	NA	NA	NA	NA	NA	NA	NA	NA	NA	0.819679	NA	0.3091	NA	NA	NA	NA	NA	NA	NA	NA	NA	NA	NA	NA	0.3397	0.2517	0.4456	0.344127	NA	NA	NA	NA	NA	NA	NA	0.3161	0.1601	0.3057	NA	NA	NA	NA	NA	0.1979	NA	0.5398	NA	NA
MIMAT0019845	NA	0.291682	NA	NA	NA	NA	0.465597	NA	NA	NA	0.4673	NA	0.1628	0.3234	NA	0.527672	0.3711	NA	NA	NA	0.2972	0.2969	0.2728	0.2172	NA	0.3397	0.2517	0.78556	0.854627	NA	0.333024	NA	NA	NA	0.408219	0.812412	NA	NA	NA	0.693993	0.651071	0.2065	NA	0.1808	0.1979	0.1324	0.3813	NA	0.3976
MIMAT0019842	NA	NA	NA	NA	NA	NA	NA	NA	NA	NA	NA	0.4037	NA	NA	NA	NA	NA	NA	NA	NA	0.2972	NA	NA	NA	NA	NA	NA	NA	NA	NA	NA	NA	NA	NA	NA	NA	NA	NA	NA	NA	NA	NA	NA	NA	NA	NA	NA	NA	NA
MIMAT0019843	NA	NA	NA	NA	0.3674	NA	NA	NA	NA	NA	NA	NA	NA	NA	NA	NA	NA	NA	NA	NA	NA	NA	NA	NA	NA	NA	NA	NA	NA	NA	NA	NA	NA	NA	NA	NA	NA	NA	NA	NA	0.131	NA	NA	NA	NA	NA	NA	NA	NA
MIMAT0019841	NA	0.835171	1.32794	0.3516	2.4957	0.86047	0.4656	NA	0.446	2.16773	NA	1.96565	0.876756	0.81058	NA	1.12272	0.3711	0.535746	0.649715	0.453506	0.54351	2.41706	0.2728	1.56046	1.14135	NA	1.22289	NA	2.87411	NA	1.27973	0.2888	0.718139	1.18912	NA	1.21611	0.794806	1.52491	1.27255	0.4976	0.464897	0.38711	1.12724	0.341444	0.667311	0.566057	0.2032	1.87165	0.964912
MIMAT0019848	NA	NA	NA	NA	NA	NA	NA	NA	NA	NA	NA	NA	NA	NA	NA	NA	NA	NA	NA	NA	NA	NA	NA	NA	NA	NA	NA	NA	0.1823	NA	NA	NA	NA	NA	NA	0.2498	0.3161	NA	NA	NA	NA	NA	NA	NA	NA	NA	NA	NA	0.3976
MIMAT0019849	NA	NA	0.811703	NA	0.3674	0.2677	NA	NA	NA	0.2696	NA	NA	NA	NA	0.6202	NA	NA	NA	NA	0.453506	0.2972	NA	NA	0.2172	0.342518	NA	NA	NA	NA	NA	NA	NA	NA	NA	NA	NA	NA	NA	NA	NA	NA	NA	NA	NA	NA	0.1324	NA	NA	NA
MIMAT0019198	NA	NA	NA	NA	NA	NA	NA	NA	NA	NA	NA	NA	NA	NA	NA	NA	NA	NA	NA	NA	NA	NA	NA	NA	NA	NA	NA	NA	NA	NA	NA	NA	NA	NA	NA	NA	NA	NA	NA	NA	NA	NA	NA	NA	NA	NA	NA	NA	NA
MIMAT0019199	NA	NA	NA	NA	0.3674	NA	NA	NA	NA	NA	NA	NA	NA	NA	NA	NA	NA	NA	NA	NA	NA	NA	NA	NA	NA	NA	NA	NA	NA	NA	NA	NA	NA	NA	0.2185	NA	NA	NA	NA	NA	NA	NA	NA	NA	NA	NA	NA	NA	NA
MIMAT0019197	NA	NA	NA	NA	NA	0.2677	NA	NA	NA	NA	NA	NA	NA	NA	NA	NA	NA	NA	NA	NA	NA	NA	NA	NA	NA	NA	NA	NA	NA	NA	NA	NA	NA	0.2141	0.4081	NA	NA	NA	NA	NA	NA	NA	NA	NA	NA	NA	NA	NA	NA
MIMAT0000703	6.73275	7.40564	7.07325	7.53393	8.48377	8.66021	7.25894	7.91478	7.38308	7.59946	7.76863	8.86395	7.81402	7.80685	8.55218	7.09521	7.46776	7.33161	7.65957	9.07686	7.41	7.77598	7.41143	7.33102	7.54769	7.271	7.46683	8.29142	8.55585	7.49481	7.89972	7.64223	7.82091	7.49872	9.05484	7.22661	7.58911	7.54416	7.48703	8.38891	7.519	7.88999	7.23647	7.73398	7.62052	8.05039	7.46801	7.24389	7.95173
MIMAT0000707	3.52105	0.641612	3.09623	3.29722	7.00347	3.5365	2.93837	3.09278	1.49137	4.48348	2.02145	2.6979	3.15153	3.29217	2.40514	4.34233	3.96977	4.9705	2.7002	3.47978	4.75921	3.27522	2.81491	4.0527	1.58964	3.20636	3.043	1.96167	5.32436	2.56061	1.68119	3.23592	3.76321	1.83199	3.74682	2.96441	0.575236	3.47149	4.0713	6.60543	4.90199	2.08113	1.22164	1.64909	2.68675	4.65644	2.25736	3.21335	2.9381
MIMAT0000705	2.87644	1.53805	4.7578	1.2508	4.05829	5.08896	2.20744	4.8615	0.446	3.03417	4.48667	3.83158	4.20511	4.51505	2.25094	3.81782	3.96979	3.28809	3.81598	3.59447	3.40717	1.98919	3.374	3.7028	3.58334	3.40018	3.70117	1.66509	4.46927	1.69458	2.32893	3.0933	3.37198	3.31624	2.34682	2.31316	2.1471	2.44875	3.59586	2.29643	1.87253	2.86964	2.72791	3.76029	2.08193	2.18773	1.14408	2.72579	0.708964
MIMAT0021079	NA	NA	NA	NA	NA	NA	NA	NA	NA	NA	0.46732	NA	NA	NA	NA	NA	NA	NA	NA	NA	NA	NA	NA	NA	NA	NA	NA	NA	NA	NA	NA	NA	NA	NA	NA	NA	NA	NA	NA	NA	NA	NA	NA	NA	NA	NA	NA	0.1988	NA
MIMAT0027595	NA	NA	NA	NA	NA	NA	0.2515	NA	NA	NA	NA	NA	NA	NA	NA	NA	NA	NA	NA	NA	NA	NA	NA	NA	NA	NA	NA	NA	NA	NA	NA	NA	NA	NA	NA	NA	NA	NA	NA	NA	NA	NA	NA	NA	NA	NA	NA	NA	NA
MIMAT0027594	NA	NA	NA	NA	NA	NA	0.4656	NA	0.446	NA	0.2525	NA	NA	0.3234	NA	NA	NA	NA	NA	NA	NA	NA	NA	NA	0.1814	NA	NA	NA	NA	0.146	NA	NA	NA	0.2141	NA	NA	NA	NA	NA	NA	NA	NA	NA	NA	NA	0.1324	NA	NA	NA
MIMAT0027597	NA	NA	NA	NA	NA	NA	NA	NA	NA	NA	NA	NA	0.1628	NA	NA	NA	NA	NA	NA	NA	NA	NA	NA	NA	NA	NA	NA	NA	NA	NA	NA	NA	NA	NA	NA	0.2498	NA	NA	NA	NA	NA	NA	NA	NA	NA	NA	NA	NA	NA
MIMAT0027596	NA	NA	NA	NA	NA	NA	NA	NA	NA	NA	NA	NA	NA	NA	NA	NA	NA	NA	NA	NA	NA	NA	NA	NA	NA	NA	NA	NA	NA	NA	NA	NA	NA	NA	NA	NA	NA	NA	NA	NA	0.131	NA	NA	NA	NA	NA	NA	NA	NA
MIMAT0027591	NA	NA	NA	NA	NA	NA	0.2515	NA	NA	NA	0.6542	NA	NA	NA	NA	NA	NA	NA	NA	NA	NA	NA	NA	NA	NA	NA	NA	NA	NA	NA	NA	NA	NA	NA	NA	NA	0.3161	NA	NA	NA	NA	NA	0.1992	NA	NA	NA	NA	NA	NA
MIMAT0027590	NA	NA	NA	NA	NA	NA	NA	NA	NA	NA	NA	NA	NA	NA	NA	NA	NA	NA	NA	NA	NA	NA	NA	NA	NA	NA	NA	NA	NA	NA	NA	NA	NA	NA	NA	NA	NA	NA	NA	NA	NA	NA	NA	NA	NA	NA	NA	NA	NA
MIMAT0020299	NA	NA	0.4622	0.3516	NA	NA	NA	NA	NA	NA	NA	NA	NA	NA	NA	NA	NA	NA	NA	NA	NA	NA	NA	NA	NA	NA	NA	NA	NA	NA	NA	NA	NA	NA	NA	NA	NA	NA	NA	NA	NA	NA	NA	NA	NA	NA	NA	NA	NA
MIMAT0027592	NA	NA	NA	NA	NA	NA	NA	NA	NA	NA	0.819679	NA	NA	NA	NA	NA	NA	NA	NA	NA	NA	NA	NA	NA	NA	NA	NA	NA	NA	NA	NA	NA	NA	NA	NA	NA	NA	0.1601	NA	NA	NA	NA	NA	NA	NA	NA	NA	NA	NA
MIMAT0027599	NA	NA	NA	NA	NA	0.493416	NA	NA	NA	NA	NA	NA	NA	NA	NA	NA	NA	NA	NA	0.2445	NA	NA	NA	NA	NA	NA	NA	NA	NA	NA	NA	NA	NA	NA	NA	0.2498	NA	NA	NA	NA	NA	NA	NA	NA	NA	NA	NA	NA	NA
MIMAT0027598	NA	NA	NA	0.3516	NA	NA	NA	NA	NA	NA	0.2525	NA	NA	NA	NA	NA	NA	NA	NA	NA	NA	NA	NA	NA	NA	NA	NA	NA	NA	NA	NA	NA	NA	NA	NA	NA	NA	NA	NA	NA	NA	NA	NA	NA	NA	NA	NA	NA	NA
MIMAT0018929	NA	NA	NA	NA	NA	NA	NA	NA	NA	NA	NA	NA	NA	NA	NA	NA	NA	NA	NA	NA	NA	NA	NA	NA	NA	NA	NA	NA	NA	NA	NA	NA	NA	NA	NA	NA	NA	NA	NA	NA	NA	NA	NA	NA	NA	NA	NA	NA	NA
MIMAT0027041	NA	NA	NA	NA	NA	NA	NA	NA	NA	0.2696	0.2525	NA	NA	NA	NA	NA	NA	NA	NA	NA	NA	NA	NA	NA	NA	NA	NA	NA	NA	NA	NA	NA	NA	NA	NA	NA	NA	NA	NA	NA	0.131	NA	NA	NA	NA	NA	NA	NA	NA
MIMAT0000459	3.07829	2.64707	1.86517	2.50867	3.89916	2.91177	3.2295	NA	1.06136	2.71101	3.54958	1.84105	3.59841	2.70688	1.88191	3.40171	2.77979	2.86695	2.37066	3.79966	3.68893	3.96548	3.01393	2.47214	3.59938	4.03546	2.26649	3.52287	4.58715	1.78652	2.04113	2.2532	3.72853	2.79086	2.81737	3.06561	3.39962	4.88914	3.01427	4.02128	2.68219	3.37664	2.03861	2.72416	3.31714	2.75837	2.16309	2.44176	1.1823
MIMAT0000458	1.40855	1.15833	2.56289	1.55169	1.11105	2.50849	1.62988	NA	1.49131	0.692834	0.8197	1.3864	2.19675	0.81058	1.3848	2.08361	1.30262	3.18488	1.62566	1.7658	2.93252	1.24538	1.52282	3.33587	2.36551	1.04408	1.63062	1.82099	1.8853	2.3356	1.84648	3.30219	1.55343	2.01448	1.56653	1.70852	1.4408	1.12006	3.09615	1.28771	0.815937	1.85436	2.03861	1.82251	1.54145	1.49876	1.56861	1.22024	2.35771
MIMAT0000457	1.25036	0.741561	1.7073	1.40907	3.18902	1.78537	0.465597	1.2445	0.786192	2.29393	3.74748	0.4037	1.76108	2.00568	1.0526	1.92485	1.11997	1.48471	1.53417	1.68521	1.24647	0.936525	0.699952	1.56039	1.22641	2.23781	1.33604	0.78556	2.40897	0.511986	1.55931	1.47139	1.38549	0.565539	1.56654	1.32896	0.794806	1.93223	1.407	1.61312	0.561028	2.08112	0.671063	1.70924	1.2159	0.656757	1.23959	1.61762	0.964912
MIMAT0000456	7.89925	6.97847	8.67657	7.72479	8.57439	8.90138	7.82085	7.25731	8.47883	7.48499	8.33993	8.21146	8.45176	8.24472	7.87767	7.97054	8.31879	8.1317	8.04029	8.8896	7.99148	8.65413	8.28254	8.18554	8.2393	8.45717	8.38428	9.76165	9.21797	6.79896	6.85491	7.7897	8.41876	8.10634	9.34255	8.03682	7.27228	8.17302	9.56384	8.58498	7.57618	7.46035	8.11402	8.59821	7.07427	8.14313	7.34328	7.75686	7.84819
MIMAT0000455	6.14517	5.7926	7.09733	5.88134	7.79622	7.32613	5.7985	3.57952	6.05688	6.21234	6.19555	7.22105	6.32801	7.12384	6.04425	7.6505	7.24596	6.62322	6.99197	6.29564	7.27153	6.11023	6.56496	6.896	6.09862	6.26546	6.57202	6.21136	7.44391	5.41803	6.10897	6.73745	6.81487	6.62832	6.68211	6.09368	7.0125	5.787	6.50255	6.21542	6.52011	6.02265	6.1974	6.74349	6.06292	5.81903	6.21634	6.34671	5.35704
MIMAT0000454	0.869743	0.923037	1.3279	4.43931	0.3674	4.73846	0.465597	1.24453	NA	3.41376	1.33914	4.94033	3.8934	1.1741	5.2298	1.21715	0.6661	1.79623	3.41558	0.797949	2.41871	1.61176	1.62373	3.0264	1.71264	1.64337	2.82751	1.82099	1.52905	6.71368	1.89762	4.27747	2.54539	0.565539	0.2185	0.2498	0.794806	1.33663	1.52993	0.2701	0.651081	0.943583	0.799193	0.486	2.31289	5.05711	1.64043	2.23087	1.6877
MIMAT0000453	1.8	1.92601	1.09283	1.80054	2.06696	0.4935	1.62988	0.7525	0.446	0.2696	0.2525	NA	0.442	1.3265	1.05254	NA	2.35254	1.59619	0.962073	1.91451	1.24646	NA	0.700015	0.405938	1.3067	1.37465	0.652407	1.82099	1.5291	0.146	1.20049	0.529319	1.70382	0.713681	0.408219	1.09366	0.794806	0.4352	0.7723	1.95709	0.815961	2.23051	0.671063	1.37975	1.54143	1.80685	0.3813	2.08774	0.709
MIMAT0000452	3.33645	1.83834	1.5301	1.25083	1.85202	1.7854	2.14669	1.6107	NA	NA	0.9681	1.3864	1.35233	1.59004	1.0526	NA	2.35254	2.33542	2.4727	3.50344	1.81422	0.936525	1.29705	1.392	3.08796	2.15424	1.22281	1.49024	1.3114	0.2786	1.49438	0.7354	1.96445	0.970934	1.71756	2.41892	1.1537	1.33663	2.10556	2.46733	1.27853	2.18243	0.530163	3.29457	0.667172	1.84593	NA	1.54643	0.3976
MIMAT0000451	9.12153	8.37727	8.67795	11.1884	10.1844	9.60011	9.47981	12.1169	8.23699	11.6865	10.8223	11.7216	10.2535	10.7166	10.2358	9.14772	8.69781	9.45122	9.9755	9.82779	11.795	11.7455	8.31778	10.9045	10.1384	11.4808	9.37385	8.12559	10.2973	8.14439	8.62847	10.9806	9.46088	7.80669	7.46284	11.71	7.52915	10.7389	8.13498	7.45799	8.11747	10.834	8.12481	8.17295	11.143	10.9548	10.599	10.4638	8.12409
MIMAT0000450	3.99032	3.85198	3.15861	5.2152	5.80993	5.02718	4.18111	7.41613	3.52437	3.66814	2.53133	4.54088	4.77645	4.0732	3.61819	2.78421	6.02135	5.48676	3.5384	6.20825	6.19114	6.75072	3.18885	2.77575	6.76803	5.91813	4.86816	3.10424	5.62933	1.49097	5.27222	2.44146	4.45697	5.55717	5.83064	5.79783	4.51101	2.70386	6.2665	5.78008	4.0356	5.34147	5.0432	6.83236	1.97818	3.64766	3.66063	3.71336	3.05293
MIMAT0019219	NA	0.2916	1.70739	0.3516	1.7312	0.2677	NA	NA	NA	NA	0.819679	NA	NA	0.3234	0.6202	NA	0.3711	NA	NA	NA	0.2972	0.5429	0.502128	NA	0.3425	1.21874	0.2517	NA	0.4897	NA	NA	NA	NA	NA	0.8619	0.2498	NA	1.19586	NA	0.8668	0.2511	NA	NA	0.486	0.1979	NA	NA	0.67	0.3976
MIMAT0019218	NA	0.2916	NA	NA	0.903	NA	0.2515	NA	NA	NA	0.4673	NA	0.67566	NA	NA	0.1981	NA	NA	NA	0.4534	0.2972	0.543004	NA	NA	NA	0.845206	0.652443	0.4456	0.489685	NA	0.1761	NA	NA	NA	0.4081	0.812381	NA	0.1601	NA	0.2701	0.131	0.2065	0.1992	NA	NA	0.2536	NA	0.798109	NA
MIMAT0019213	NA	NA	NA	NA	NA	NA	NA	NA	NA	NA	NA	NA	NA	NA	NA	NA	NA	NA	NA	NA	NA	NA	NA	NA	NA	NA	NA	NA	0.1823	NA	NA	NA	NA	NA	NA	NA	NA	NA	NA	NA	NA	NA	NA	NA	NA	NA	NA	NA	NA
MIMAT0019212	NA	NA	NA	NA	NA	NA	NA	NA	NA	NA	NA	NA	NA	0.3234	NA	NA	NA	NA	NA	NA	NA	NA	NA	NA	NA	NA	NA	NA	NA	NA	NA	NA	NA	NA	NA	NA	0.3161	NA	NA	NA	NA	NA	NA	NA	NA	NA	NA	NA	NA
MIMAT0019211	NA	NA	0.4622	NA	0.3674	0.2677	NA	1.24453	NA	NA	NA	NA	0.1628	NA	NA	NA	NA	NA	NA	NA	NA	0.2969	NA	NA	NA	0.3397	0.2517	1.06049	0.1823	NA	0.1761	0.2888	0.4033	0.2141	NA	NA	NA	NA	0.5577	0.4976	0.361955	NA	0.374203	NA	NA	0.1324	NA	NA	0.3976
MIMAT0019210	0.3514	NA	NA	0.634082	0.3674	NA	0.465597	1.6107	NA	NA	1.10268	0.4037	0.675735	NA	NA	NA	NA	NA	NA	0.4534	NA	0.753181	0.502128	0.405938	0.3425	0.845206	0.2517	0.4456	0.344127	0.2786	0.1761	0.2888	0.4033	0.2141	0.861826	0.2498	NA	0.769046	0.3057	NA	0.131	0.38711	0.1992	0.1808	0.1979	0.2536	0.2032	0.1988	0.3976
MIMAT0019217	NA	NA	NA	NA	NA	NA	NA	NA	NA	NA	NA	NA	NA	NA	NA	NA	NA	0.2926	NA	0.2445	NA	NA	NA	NA	NA	NA	NA	NA	NA	NA	NA	NA	NA	NA	NA	NA	NA	NA	0.3057	NA	NA	NA	NA	NA	NA	NA	NA	NA	NA
MIMAT0019216	NA	NA	NA	NA	0.3674	NA	NA	1.24453	0.446	NA	0.46732	0.718783	NA	NA	0.6202	0.1981	NA	NA	NA	NA	NA	NA	0.2728	NA	0.342518	NA	0.6524	0.4456	0.344127	NA	NA	NA	NA	NA	NA	NA	NA	0.3042	NA	NA	0.131	0.2065	0.1992	0.1808	NA	0.1324	0.2032	0.3735	NA
MIMAT0019215	NA	NA	NA	NA	0.3674	NA	NA	NA	NA	NA	NA	NA	NA	NA	NA	NA	0.3711	NA	NA	0.2445	NA	NA	NA	NA	NA	0.3397	NA	NA	NA	NA	NA	NA	NA	NA	NA	NA	0.3161	NA	NA	NA	NA	NA	NA	NA	NA	NA	NA	NA	NA
MIMAT0019214	1.40857	0.2916	0.4622	NA	0.903037	0.4935	0.965121	2.35274	0.446	1.01961	1.63406	0.4037	0.563592	1.1741	1.05254	0.667889	0.3711	NA	0.2505	1.41242	NA	0.5429	NA	0.2172	0.342518	0.3397	0.2517	1.06049	0.621894	0.146	NA	0.5293	0.4033	NA	2.03785	0.2498	NA	0.4352	0.3057	1.1606	0.4649	0.823282	0.3741	0.486	0.1979	0.469271	NA	0.1988	0.3976
MIMAT0015011	NA	NA	NA	NA	NA	NA	NA	NA	NA	NA	NA	NA	NA	NA	NA	NA	NA	NA	NA	NA	NA	NA	NA	NA	NA	NA	NA	NA	NA	NA	NA	NA	NA	NA	NA	NA	NA	NA	NA	NA	NA	NA	NA	NA	NA	NA	NA	NA	NA
MIMAT0015010	NA	NA	NA	NA	0.3674	NA	NA	NA	NA	NA	NA	NA	NA	NA	NA	NA	NA	NA	NA	NA	NA	NA	NA	NA	NA	NA	NA	NA	NA	NA	NA	NA	NA	NA	NA	NA	NA	NA	NA	NA	NA	NA	NA	NA	NA	NA	NA	NA	NA
MIMAT0015013	NA	NA	NA	NA	NA	NA	NA	NA	NA	NA	NA	NA	NA	NA	NA	NA	NA	NA	NA	NA	NA	NA	NA	NA	NA	0.3397	NA	NA	NA	NA	NA	NA	NA	NA	NA	NA	NA	NA	NA	NA	NA	NA	NA	NA	NA	NA	NA	NA	NA
MIMAT0015012	0.3514	0.1532	NA	NA	NA	NA	NA	0.7525	0.446	NA	0.46732	NA	NA	NA	NA	NA	NA	NA	NA	NA	0.2972	0.5429	NA	NA	NA	NA	0.2517	0.4456	0.1823	0.146	0.474542	NA	NA	NA	0.4081	NA	NA	NA	NA	NA	NA	NA	NA	NA	NA	0.1324	NA	NA	NA
MIMAT0015015	NA	0.1532	0.811703	NA	NA	NA	0.2515	NA	0.446	0.692803	NA	NA	NA	0.5875	NA	NA	NA	NA	NA	NA	0.2972	NA	0.2728	0.572818	0.739748	NA	NA	1.29135	0.621847	0.146	NA	0.2888	NA	NA	NA	NA	NA	NA	NA	NA	0.251089	NA	NA	NA	NA	NA	NA	0.1988	NA
MIMAT0015014	NA	NA	NA	NA	NA	NA	NA	NA	NA	NA	NA	NA	NA	NA	NA	NA	NA	NA	NA	NA	NA	NA	NA	0.2172	NA	NA	NA	NA	NA	NA	NA	NA	NA	NA	NA	NA	NA	NA	NA	NA	NA	NA	NA	NA	NA	NA	NA	NA	NA
MIMAT0015017	NA	NA	NA	NA	NA	NA	NA	NA	NA	NA	NA	NA	NA	NA	NA	NA	NA	0.2926	NA	NA	NA	NA	NA	NA	NA	NA	NA	NA	NA	NA	NA	NA	NA	NA	NA	NA	NA	NA	NA	NA	NA	NA	NA	NA	NA	NA	NA	NA	NA
MIMAT0015016	NA	NA	NA	NA	0.3674	NA	NA	NA	NA	NA	0.2525	NA	NA	NA	NA	NA	NA	NA	NA	NA	NA	NA	NA	NA	NA	NA	NA	NA	0.1823	NA	NA	NA	NA	NA	NA	NA	NA	NA	NA	NA	NA	0.2065	0.1992	NA	NA	NA	NA	NA	NA
MIMAT0015019	NA	NA	NA	0.3516	NA	NA	NA	NA	NA	NA	NA	NA	NA	NA	NA	NA	NA	NA	NA	NA	NA	NA	NA	NA	NA	NA	NA	NA	NA	NA	NA	NA	NA	NA	NA	NA	NA	NA	NA	NA	NA	NA	NA	NA	NA	NA	NA	NA	NA
MIMAT0015018	NA	NA	NA	NA	NA	NA	NA	NA	NA	NA	0.46732	NA	NA	0.3234	NA	NA	NA	NA	NA	NA	NA	0.2969	NA	NA	NA	NA	NA	0.4456	0.3442	NA	NA	NA	0.4033	NA	0.2185	NA	NA	NA	0.3057	NA	NA	NA	NA	NA	NA	0.2536	NA	NA	NA
MIMAT0026606	1.07259	0.291682	2.00756	0.3516	0.659972	2.45579	0.965119	NA	0.446	0.692803	1.10271	1.55448	1.35236	1.00374	1.05254	2.43729	1.11999	1.3639	1.53414	2.66795	1.50092	1.0993	NA	1.56043	2.86731	0.845206	0.4659	2.76346	0.958167	0.712822	0.830979	1.68535	0.718139	NA	1.1006	2.367	1.15368	0.1601	1.84636	1.02115	0.251089	2.13267	1.12713	1.37975	1.68025	1.34355	0.381281	0.529306	0.964942
MIMAT0026607	NA	NA	NA	NA	NA	NA	NA	NA	NA	NA	NA	NA	NA	NA	NA	NA	NA	0.2926	0.2505	NA	NA	NA	NA	NA	NA	NA	NA	NA	NA	NA	NA	NA	NA	NA	0.2185	0.2498	NA	NA	NA	NA	NA	NA	NA	0.486	NA	NA	0.2032	0.1988	NA
MIMAT0004807	NA	NA	NA	NA	NA	NA	NA	NA	NA	NA	NA	NA	NA	NA	NA	NA	NA	NA	NA	NA	NA	NA	NA	NA	0.1814	0.3397	NA	0.4456	NA	NA	NA	NA	NA	0.2141	NA	0.2498	NA	NA	NA	NA	NA	0.2065	NA	NA	NA	NA	NA	NA	NA
MIMAT0022299	NA	NA	0.4622	NA	NA	NA	NA	NA	NA	NA	NA	NA	NA	NA	NA	NA	NA	NA	NA	NA	NA	NA	NA	NA	NA	NA	NA	NA	NA	NA	NA	NA	NA	NA	NA	NA	NA	NA	NA	NA	NA	NA	NA	NA	NA	NA	NA	NA	NA
MIMAT0022298	NA	NA	NA	NA	NA	NA	NA	NA	NA	NA	1.44427	NA	NA	NA	NA	NA	NA	NA	NA	0.2445	NA	NA	NA	NA	NA	NA	NA	NA	NA	NA	NA	NA	NA	NA	NA	NA	NA	NA	NA	NA	NA	NA	NA	NA	NA	NA	NA	NA	NA
MIMAT0022295	NA	NA	NA	NA	NA	NA	NA	NA	NA	0.2696	NA	NA	NA	0.3234	NA	NA	NA	NA	NA	NA	NA	NA	NA	NA	NA	NA	NA	NA	NA	NA	NA	NA	NA	0.2141	0.72604	0.2498	0.5752	0.3042	NA	0.2701	NA	NA	NA	NA	NA	NA	NA	NA	NA
MIMAT0022294	NA	NA	0.4622	NA	0.3674	0.2677	NA	NA	0.7863	NA	NA	NA	NA	NA	0.6202	0.1981	0.3711	NA	0.2505	0.2445	NA	0.2969	NA	NA	NA	NA	NA	NA	NA	0.146	NA	0.2888	NA	NA	NA	NA	0.794837	NA	NA	0.2701	0.131	NA	NA	NA	NA	NA	NA	0.1988	NA
MIMAT0022297	NA	NA	NA	NA	NA	NA	NA	NA	NA	NA	2.43257	NA	NA	NA	NA	NA	NA	NA	NA	NA	NA	NA	NA	NA	NA	NA	NA	NA	NA	NA	NA	NA	NA	NA	NA	NA	NA	NA	NA	NA	NA	NA	NA	NA	NA	NA	NA	NA	NA
MIMAT0022296	NA	NA	0.4622	NA	NA	0.2677	NA	1.2445	NA	0.496664	NA	NA	NA	NA	NA	0.1981	NA	NA	NA	NA	NA	NA	NA	NA	0.1814	0.3397	NA	0.4456	0.3442	0.146	0.333	0.735411	NA	0.2141	0.986213	NA	0.575236	NA	NA	0.497518	NA	NA	NA	NA	NA	NA	0.2032	0.1988	0.3976
MIMAT0022290	NA	0.1532	NA	NA	NA	NA	0.2515	NA	NA	NA	NA	NA	NA	NA	NA	NA	NA	NA	NA	NA	NA	NA	NA	NA	NA	NA	NA	NA	NA	NA	NA	NA	NA	NA	NA	NA	NA	NA	NA	NA	NA	NA	NA	NA	NA	NA	NA	NA	NA
MIMAT0022293	NA	0.418028	0.4622	NA	0.3674	NA	0.817034	NA	0.446	NA	0.2525	NA	NA	NA	NA	NA	0.3711	NA	NA	0.453506	NA	0.2969	NA	0.2172	NA	0.3397	0.2517	NA	0.1823	0.399983	0.4745	NA	NA	NA	0.2185	NA	0.575236	0.555197	NA	0.2701	NA	NA	NA	0.341444	0.527153	0.1324	NA	1.02453	NA
MIMAT0022292	NA	0.4179	NA	0.3516	NA	NA	0.4656	NA	NA	0.2696	NA	NA	NA	0.5875	NA	0.3723	NA	0.2926	0.4639	0.2445	0.2972	NA	0.873935	NA	0.1814	0.6145	NA	NA	0.489685	NA	NA	0.2888	0.4033	0.2141	0.5757	0.2498	NA	0.769	0.3057	0.2701	0.561	0.2065	NA	0.3415	NA	0.3655	NA	0.3735	NA
MIMAT0022728	NA	NA	NA	NA	NA	NA	NA	NA	NA	NA	0.2525	NA	NA	NA	NA	NA	NA	NA	NA	NA	0.54351	NA	NA	NA	NA	NA	NA	NA	NA	NA	NA	NA	NA	NA	NA	NA	NA	NA	NA	NA	NA	NA	NA	NA	NA	NA	NA	NA	NA
MIMAT0022946	NA	NA	NA	NA	NA	NA	0.2515	NA	NA	NA	NA	NA	NA	NA	NA	NA	NA	NA	NA	NA	NA	NA	NA	NA	NA	NA	NA	NA	NA	NA	NA	NA	NA	NA	NA	NA	NA	NA	NA	NA	NA	NA	NA	0.1808	NA	NA	NA	NA	0.3976
MIMAT0022727	8.29346	9.58597	10.4551	6.89265	10.3684	6.68306	10.2751	4.12365	9.61325	7.51125	7.71445	5.39244	7.74255	7.22182	5.25031	8.53684	8.8938	7.11242	6.7892	9.60025	7.39238	8.15006	9.43575	7.09601	7.74166	9.94111	8.0213	9.38359	10.3102	3.69264	6.88375	6.15481	10.1277	9.37799	8.38873	7.94792	7.48841	9.22925	8.76008	9.70555	9.93117	8.41198	8.24021	7.36247	7.56675	9.58736	6.89264	10.0176	9.13703
MIMAT0004960	NA	NA	NA	NA	NA	NA	NA	NA	NA	NA	NA	NA	NA	NA	NA	NA	NA	NA	NA	NA	NA	NA	NA	NA	NA	NA	NA	NA	NA	NA	NA	NA	NA	NA	NA	NA	NA	NA	NA	NA	NA	NA	NA	NA	NA	NA	NA	NA	NA
MIMAT0022721	1.55119	3.52706	2.137	4.20034	3.18902	3.16232	0.652	7.7593	0.446	2.88163	5.14663	6.04918	4.23293	2.17584	3.79607	0.3723	1.97588	2.99453	2.52114	3.50344	2.28964	3.37389	3.18877	2.24374	3.51734	4.08146	1.09999	4.79592	3.54137	3.93292	4.12811	4.61411	1.9644	1.0841	4.85577	4.67664	3.29545	3.34391	NA	1.61312	1.0326	2.70921	3.76363	1.52072	3.76992	2.43852	4.09019	2.48048	1.53807
MIMAT0022720	0.3514	0.291682	0.4622	4.3048	NA	0.860536	NA	NA	NA	0.2696	1.54217	0.718783	0.1628	0.3234	1.0526	0.1981	0.666009	0.2926	0.4639	0.453506	0.2972	NA	0.5022	NA	0.739751	NA	0.465942	NA	0.621894	NA	0.603389	NA	0.718139	NA	NA	0.2498	0.3161	NA	0.959082	NA	0.131	2.52858	NA	0.952105	NA	2.18778	0.2032	0.373494	NA
MIMAT0022707	NA	NA	NA	NA	0.3674	NA	NA	NA	NA	NA	NA	NA	0.309078	NA	NA	NA	NA	NA	NA	NA	NA	NA	NA	NA	NA	NA	NA	NA	NA	NA	NA	NA	NA	0.2141	NA	NA	NA	0.1601	NA	NA	NA	NA	NA	NA	NA	NA	NA	NA	NA
MIMAT0004485	2.36091	3.49875	3.43531	3.94007	4.39305	4.37716	3.91582	5.74733	3.43054	3.44131	1.33904	4.5803	4.49995	4.34703	4.77184	1.8084	2.95373	3.94387	3.06957	5.70969	3.55494	4.49028	2.3683	2.77576	4.29452	3.83533	2.82753	3.2208	3.6382	2.88575	3.95784	3.4558	3.41622	3.92993	3.92821	3.53427	2.9286	4.00186	4.05093	5.11978	3.12101	3.99328	4.19524	4.05502	3.33821	4.00803	3.51555	3.4463	3.52006
MIMAT0004486	2.01215	2.39395	2.137	1.4091	1.96348	1.50345	3.00838	NA	2.51343	2.41006	1.33911	2.28524	1.85943	1.46418	2.07821	1.61397	1.97588	1.59622	1.43651	1.91447	1.10021	1.90361	0.8739	1.63779	2.20713	2.15427	2.26655	1.49029	1.83171	1.43526	1.62148	2.2532	1.55341	0.565539	2.63957	2.65373	1.97796	2.47939	1.8463	2.35571	0.963942	1.79158	2.69533	2.16075	1.61256	2.02695	2.93637	1.61766	0.708964
MIMAT0021123	NA	NA	NA	NA	NA	NA	NA	NA	NA	NA	NA	NA	NA	NA	NA	NA	NA	NA	NA	NA	NA	NA	NA	NA	NA	NA	NA	NA	NA	NA	NA	NA	NA	NA	NA	NA	NA	NA	NA	NA	NA	NA	NA	NA	NA	NA	NA	NA	NA
MIMAT0003150	5.1929	4.5276	4.56414	3.17032	4.87873	5.94881	4.68696	NA	3.91926	5.02869	3.74748	5.51974	5.52499	5.16725	3.90353	3.86236	4.52374	5.44275	5.01289	5.62044	5.4895	4.41502	4.99137	4.20026	4.91045	5.22391	5.48037	4.93894	5.35322	2.92678	3.50908	4.50575	4.61724	3.85207	3.92816	4.67659	4.31187	4.38079	4.89672	4.24147	3.38	4.72185	4.08629	5.57288	3.94538	5.03613	4.15291	4.18114	2.4443
MIMAT0022501	NA	NA	NA	NA	NA	NA	NA	NA	NA	NA	NA	NA	NA	NA	NA	NA	NA	NA	NA	NA	NA	NA	NA	NA	NA	NA	NA	NA	NA	NA	NA	NA	NA	NA	NA	NA	NA	NA	NA	NA	NA	NA	NA	NA	NA	NA	NA	NA	NA
MIMAT0022500	0.3514	0.534076	0.4622	0.634	0.3674	0.2677	NA	NA	0.446	NA	0.2525	NA	NA	0.3234	NA	0.527672	NA	NA	0.2505	NA	0.54351	0.936437	0.5022	0.2172	NA	NA	0.2517	0.4456	0.489685	0.2786	0.333	NA	0.4033	0.2141	0.4081	0.812412	0.3161	0.666063	NA	0.497518	0.131	0.3871	0.374203	0.1808	NA	0.566057	0.2032	0.669914	0.708964
MIMAT0022502	0.3514	0.741666	0.4622	NA	0.3674	NA	NA	NA	0.446	0.692803	NA	NA	0.1628	0.3234	NA	0.795746	0.3711	0.535746	0.2505	0.63603	0.2972	NA	NA	0.2172	NA	NA	0.2517	NA	0.621834	NA	0.47452	NA	NA	1.28694	NA	0.2498	NA	NA	0.3057	NA	NA	0.3871	NA	NA	NA	NA	0.381281	NA	NA
MIMAT0022702	NA	0.641636	NA	NA	NA	NA	NA	NA	NA	NA	NA	0.4037	NA	NA	NA	NA	NA	NA	NA	NA	1.61308	NA	NA	0.572818	0.619117	NA	NA	NA	NA	NA	NA	NA	2.18513	NA	0.2185	NA	0.3161	0.435195	NA	NA	NA	NA	0.374203	0.341444	0.1979	0.1324	NA	NA	NA
MIMAT0004482	5.03195	5.41495	3.7507	4.24305	5.29573	4.68222	5.53964	7.25733	4.75947	4.03659	3.84668	4.8135	3.91638	3.29218	5.59298	3.40175	4.38884	4.2639	3.62962	5.40472	3.76371	5.70528	2.89783	3.70284	4.16039	5.26432	4.16686	3.98524	4.70361	3.8501	4.95359	4.54735	3.83016	3.47003	5.843	4.38187	4.41487	5.45005	3.70429	5.15359	2.93624	4.32771	5.47637	4.86657	4.26507	4.39827	5.3815	3.38643	3.90332
MIMAT0025849	1.25028	0.417953	0.4622	4.1786	0.6599	0.4935	1.22223	NA	0.446	0.496664	2.4828	0.4037	0.675735	1.58997	1.38475	0.667964	NA	0.7437	1.0961	1.41248	0.54351	1.90363	0.5022	1.09571	0.954459	1.04408	NA	0.4456	0.489685	0.511986	0.721695	1.22015	1.38549	0.400494	0.861826	1.62265	0.575236	0.865136	0.557813	0.4976	0.251089	0.2065	0.670923	0.341444	0.527064	1.54699	1.49311	1.02454	0.708964
MIMAT0018928	NA	NA	NA	NA	NA	NA	NA	NA	NA	NA	NA	NA	NA	NA	NA	NA	NA	NA	0.2505	NA	NA	NA	0.2728	0.2172	NA	NA	NA	NA	NA	NA	NA	NA	NA	NA	NA	NA	NA	NA	NA	NA	NA	NA	NA	NA	NA	NA	NA	NA	NA
MIMAT0005880	NA	NA	NA	0.3516	NA	NA	NA	NA	NA	NA	NA	NA	NA	NA	NA	NA	NA	NA	NA	NA	NA	NA	NA	NA	NA	NA	NA	NA	0.1823	NA	NA	NA	NA	NA	NA	NA	NA	NA	NA	NA	0.131	NA	NA	0.1808	NA	NA	NA	NA	NA
MIMAT0016895	4.61131	6.26136	5.77134	5.67865	6.67133	4.53772	5.90776	1.9025	5.48664	4.15776	3.8078	5.55978	5.32883	6.00747	4.93271	4.50083	6.04075	4.5809	4.43755	7.13924	5.31807	7.15861	5.25784	5.05865	6.46083	7.93339	5.05341	4.97258	6.48613	3.5023	5.77115	4.57445	6.12299	5.88866	6.40439	7.68718	4.72656	5.39882	7.02849	6.30835	6.30975	6.20525	6.29309	6.0449	4.60711	5.77159	5.34437	5.395	6.01761
MIMAT0018926	1.07259	0.291682	0.4622	0.3516	1.29281	0.2677	0.817031	NA	0.786192	1.28588	0.9681	0.4037	0.675727	0.3234	NA	1.38914	0.3711	NA	0.649739	1.07589	0.5436	0.543004	0.2728	0.405938	0.739751	0.3397	NA	NA	0.854615	0.278573	NA	0.915694	0.7181	NA	NA	0.2498	1.15365	0.1601	0.3057	NA	0.464897	0.2065	NA	0.341444	0.7949	0.566109	NA	0.915761	0.708964
MIMAT0018927	NA	NA	NA	NA	NA	NA	NA	NA	NA	NA	NA	NA	NA	NA	NA	NA	NA	NA	NA	NA	NA	NA	NA	NA	NA	NA	NA	NA	NA	NA	NA	NA	NA	NA	NA	NA	NA	NA	NA	NA	NA	NA	NA	NA	NA	NA	NA	NA	NA
MIMAT0018925	NA	NA	0.4622	NA	0.3674	0.4935	0.2515	0.7525	NA	NA	0.2525	NA	0.1628	NA	NA	0.1981	NA	NA	0.2505	NA	0.2972	0.2969	NA	NA	0.1814	NA	0.4659	NA	NA	NA	NA	NA	NA	NA	NA	0.2498	NA	0.3042	NA	NA	NA	NA	NA	NA	NA	NA	NA	0.1988	NA
MIMAT0027345	NA	NA	NA	NA	NA	0.2677	NA	NA	NA	NA	NA	NA	NA	NA	NA	NA	NA	0.5357	NA	0.453506	NA	NA	NA	NA	NA	NA	NA	NA	NA	NA	0.333024	NA	NA	NA	0.408219	NA	NA	NA	0.5577	NA	NA	NA	0.1992	NA	NA	0.1324	NA	NA	NA
MIMAT0019729	1.68096	2.33108	2.36557	2.10804	1.73115	2.02103	2.37565	4.12369	1.49132	2.46478	3.97503	1.96558	1.81111	1.59003	2.78832	1.61398	3.73567	1.36387	1.94275	2.7092	1.99063	3.68707	2.30894	0.857786	1.30673	2.15427	1.87504	5.03759	1.3877	0.969815	0.333	1.58223	2.46341	3.8198	3.8321	2.46901	1.30436	1.638	0.557813	3.94621	2.68219	1.42904	1.31052	3.38956	0.7949	2.46388	1.83642	2.81938	0.3976
MIMAT0019728	1.25037	0.534076	1.09275	1.409	0.3674	0.688622	0.817041	1.24453	0.786192	NA	0.819716	0.977235	0.67566	0.81058	0.6202	0.527672	1.11997	0.2926	0.2505	0.636	0.7539	0.2969	1.29693	0.405938	0.1814	NA	0.4659	0.78556	0.621847	0.146	0.721695	NA	1.38549	NA	0.575758	0.462664	0.3161	0.3042	1.84633	0.2701	0.651099	0.3871	0.3741	0.48598	0.1979	0.566136	0.381281	0.1988	0.965
MIMAT0019727	NA	NA	NA	NA	NA	NA	NA	NA	NA	NA	NA	NA	NA	NA	NA	NA	NA	NA	NA	NA	NA	NA	NA	NA	NA	NA	NA	NA	NA	NA	NA	NA	NA	NA	0.2185	NA	NA	0.1601	NA	NA	NA	NA	NA	NA	NA	NA	NA	NA	NA
MIMAT0019726	NA	NA	NA	NA	NA	NA	NA	NA	NA	NA	NA	NA	0.1628	NA	NA	NA	NA	NA	NA	NA	NA	0.543004	NA	NA	0.1814	NA	NA	NA	NA	NA	NA	NA	NA	NA	NA	NA	NA	NA	NA	0.2701	0.131	NA	NA	NA	NA	NA	NA	NA	NA
MIMAT0019725	NA	0.417953	0.4622	0.3516	0.3674	NA	0.465597	NA	NA	1.5106	2.75216	1.1962	0.1628	NA	NA	NA	0.3711	1.08689	0.814314	1.19701	0.54351	0.2969	NA	NA	0.3425	NA	0.465942	NA	0.6219	NA	0.1761	NA	0.4033	0.2141	NA	0.812381	0.3161	NA	NA	NA	NA	NA	0.1992	0.1808	NA	0.469306	0.2032	1.02447	0.3976
MIMAT0019724	NA	NA	NA	NA	1.1111	NA	NA	NA	NA	0.496664	NA	0.7187	0.563481	NA	NA	0.1981	NA	0.535746	0.2505	NA	0.54351	NA	NA	0.2172	0.1814	NA	NA	0.4456	0.489619	NA	0.830994	NA	NA	0.2141	NA	0.462664	1.15363	0.4351	0.557813	NA	NA	NA	NA	0.3415	NA	NA	NA	NA	0.3976
MIMAT0019723	NA	NA	NA	NA	NA	NA	NA	NA	NA	NA	NA	NA	NA	NA	NA	NA	NA	0.2926	NA	NA	NA	NA	NA	NA	NA	NA	NA	NA	NA	NA	NA	NA	NA	NA	NA	NA	NA	NA	NA	NA	NA	NA	NA	NA	NA	NA	NA	NA	NA
MIMAT0019722	NA	NA	NA	NA	NA	NA	NA	NA	NA	NA	NA	NA	NA	NA	NA	NA	NA	NA	NA	NA	NA	NA	NA	NA	NA	NA	NA	NA	NA	NA	NA	NA	NA	NA	NA	NA	NA	NA	NA	NA	NA	NA	NA	NA	NA	NA	NA	NA	NA
MIMAT0019721	NA	NA	NA	NA	NA	NA	NA	NA	NA	NA	NA	NA	NA	NA	NA	NA	NA	NA	NA	NA	NA	0.2969	NA	NA	NA	0.3397	NA	NA	NA	NA	NA	0.2888	NA	NA	NA	NA	NA	NA	NA	NA	0.131	NA	NA	NA	NA	NA	NA	NA	NA
MIMAT0019720	NA	NA	NA	NA	0.3674	NA	0.2515	NA	NA	NA	NA	NA	NA	NA	NA	0.1981	NA	NA	0.2505	0.453506	NA	1.09917	NA	NA	NA	1.04405	NA	0.4456	0.344127	NA	0.1761	NA	0.4033	0.400494	NA	NA	NA	0.1601	0.3057	NA	NA	0.2065	NA	NA	0.371899	0.1324	NA	0.529301	0.3976
MIMAT0018078	NA	NA	NA	NA	NA	NA	NA	NA	NA	NA	NA	0.4037	NA	NA	NA	NA	NA	NA	NA	NA	NA	NA	0.2728	NA	NA	NA	NA	NA	NA	NA	NA	NA	NA	NA	NA	NA	NA	NA	NA	NA	NA	NA	NA	NA	NA	NA	NA	NA	NA
MIMAT0018070	NA	NA	NA	NA	NA	NA	NA	NA	0.446	0.496664	NA	NA	NA	NA	NA	NA	0.3711	NA	NA	0.2445	NA	NA	NA	NA	NA	NA	NA	NA	NA	NA	0.333024	NA	NA	0.400494	NA	0.2498	NA	NA	0.3057	NA	NA	NA	NA	NA	NA	NA	NA	NA	NA
MIMAT0018071	1.5512	0.641636	1.0927	0.634	1.29286	NA	0.817034	3.09279	NA	NA	1.10263	0.4037	0.5635	1.58993	0.6202	0.1981	1.61054	NA	0.649715	0.943567	1.10019	0.543004	1.29701	0.2172	1.22639	2.53077	0.652443	0.78556	0.742899	NA	0.603389	NA	1.70384	0.713711	1.3054	1.53125	0.3161	1.63803	0.5577	0.4976	0.963869	0.943571	NA	0.48603	0.794849	0.822837	0.2032	0.798027	0.3976
MIMAT0018072	NA	0.1532	NA	1.25083	0.3674	NA	NA	2.53428	NA	0.2696	0.968163	0.4037	NA	0.81058	0.6202	NA	NA	0.2926	NA	NA	NA	0.2969	0.5022	0.405938	0.1814	0.6145	NA	NA	NA	NA	NA	0.735394	NA	NA	0.408219	NA	NA	0.304195	NA	0.2701	0.361955	NA	0.374203	NA	NA	0.365462	0.2032	NA	1.18222
MIMAT0018073	1.25031	2.36294	2.13699	2.36155	3.36179	1.27938	2.47785	5.63258	0.786192	3.32783	2.43264	2.4647	1.48132	1.70557	1.05254	1.61391	1.30258	2.05228	1.62565	3.13023	2.22043	4.68225	1.8065	1.47879	1.38282	3.07618	1.79821	3.61101	1.7181	1.11873	1.42634	1.58235	2.18514	2.75708	3.09092	3.19035	2.67554	3.61656	0.772354	3.4977	1.38735	3.06801	2.03872	1.13859	1.97821	3.42048	2.65393	1.81227	1.68764
MIMAT0018074	NA	NA	NA	NA	NA	NA	0.2515	NA	NA	NA	0.4673	NA	NA	NA	NA	0.1981	NA	NA	0.2505	0.2445	NA	0.5429	NA	0.2172	NA	0.3397	NA	NA	0.1823	NA	0.1761	NA	0.4033	0.2141	0.408219	NA	NA	0.1601	NA	NA	NA	NA	NA	0.1808	0.1979	0.253664	NA	NA	NA
MIMAT0018075	NA	NA	NA	NA	NA	NA	NA	1.2445	NA	NA	0.46732	0.4037	0.1628	0.3234	NA	NA	0.3711	NA	NA	0.2445	NA	0.2969	NA	0.2172	NA	0.3397	NA	0.4456	0.489619	NA	NA	NA	0.4033	0.400494	0.4081	NA	NA	0.435195	NA	0.693921	0.131	NA	NA	NA	0.1979	0.253664	NA	0.1988	NA
MIMAT0018076	NA	NA	NA	0.3516	NA	0.2677	NA	NA	NA	NA	NA	NA	NA	NA	NA	NA	NA	NA	NA	NA	NA	NA	NA	NA	NA	NA	NA	NA	NA	NA	NA	NA	NA	NA	NA	NA	NA	NA	NA	NA	NA	NA	NA	NA	NA	NA	NA	NA	NA
MIMAT0018077	NA	NA	NA	NA	NA	NA	NA	NA	NA	NA	NA	NA	NA	NA	NA	NA	NA	NA	NA	NA	NA	NA	NA	NA	NA	NA	NA	NA	0.1823	NA	NA	NA	NA	NA	NA	NA	NA	NA	NA	NA	NA	NA	NA	NA	NA	0.1324	NA	NA	NA
MIMAT0021081	NA	NA	NA	NA	NA	NA	NA	NA	NA	NA	NA	NA	NA	NA	NA	0.1981	0.3711	NA	NA	NA	NA	NA	NA	NA	NA	NA	0.2517	NA	NA	NA	NA	NA	0.4033	0.2141	NA	NA	0.3161	NA	NA	NA	0.131	NA	NA	NA	NA	0.1324	NA	NA	NA
MIMAT0021080	NA	NA	NA	NA	NA	NA	NA	NA	NA	NA	NA	NA	NA	NA	NA	NA	0.3711	NA	NA	NA	NA	NA	NA	NA	0.1814	0.3397	NA	NA	NA	NA	NA	NA	NA	NA	NA	NA	NA	NA	NA	NA	NA	NA	NA	NA	NA	NA	NA	NA	NA
MIMAT0021083	0.3514	0.741666	NA	1.25083	0.903098	0.2677	0.465597	1.90257	0.786192	1.40262	NA	0.977235	0.1628	NA	0.6202	0.1981	0.3711	NA	0.4639	0.63603	0.2972	0.543004	0.2728	NA	0.1814	0.3397	NA	1.82097	0.1823	0.512009	1.2798	0.735394	NA	0.713711	0.4081	0.648122	0.985358	0.4352	0.3057	1.02121	0.131	0.547604	1.39411	0.3415	1.38792	0.365462	0.381281	NA	0.3976
MIMAT0021082	0.3514	0.291682	NA	0.870207	0.659972	NA	1.09941	1.6107	NA	1.40258	0.9681	NA	0.309078	0.810507	NA	0.795813	NA	NA	0.2505	0.453506	0.2972	1.3781	0.2728	NA	0.1814	0.3397	0.2517	NA	0.742887	NA	1.11662	0.2888	NA	NA	NA	0.2498	0.985331	0.865136	NA	0.2701	0.251089	0.2065	0.917003	NA	1.02082	0.656868	1.04178	0.798032	2.26547
MIMAT0021085	NA	NA	NA	NA	NA	NA	NA	NA	NA	NA	NA	NA	NA	NA	NA	NA	NA	NA	NA	NA	NA	NA	NA	NA	NA	NA	NA	NA	NA	NA	NA	NA	NA	NA	NA	NA	NA	NA	NA	NA	NA	NA	NA	NA	NA	NA	NA	NA	NA
MIMAT0021084	NA	NA	NA	NA	NA	NA	NA	NA	NA	NA	NA	NA	NA	NA	NA	NA	NA	NA	NA	NA	NA	NA	NA	NA	NA	NA	NA	NA	NA	NA	NA	NA	NA	NA	NA	NA	NA	NA	NA	NA	NA	NA	NA	0.1808	NA	NA	NA	NA	NA
MIMAT0021086	0.3514	NA	0.4622	0.3516	NA	NA	NA	NA	NA	0.2696	0.2525	NA	NA	NA	NA	NA	NA	NA	NA	NA	NA	NA	0.2728	NA	NA	NA	NA	NA	0.489619	NA	0.1761	NA	NA	NA	NA	NA	0.3161	0.1601	0.3057	NA	0.251089	0.2065	NA	NA	0.1979	NA	NA	0.1988	NA
MIMAT0002172	2.10756	0.835171	0.4622	1.07301	0.903037	0.2677	0.817041	NA	NA	NA	0.2525	NA	0.675744	1.46418	NA	NA	1.30268	0.925496	1.94274	1.50923	0.937435	NA	1.0292	0.2172	1.71267	0.614462	NA	1.06052	0.958315	0.146	0.1761	0.5293	0.718139	0.400494	0.408219	1.0937	0.575236	0.865132	1.27255	1.87848	0.131	1.05455	0.374203	0.848896	NA	1.10656	NA	0.529306	NA
MIMAT0002173	1.40861	3.03002	NA	0.870137	0.659972	0.6886	0.465597	3.30754	NA	2.23221	0.4673	3.12905	1.21057	0.3234	0.6202	NA	NA	0.925496	0.2505	0.453506	0.54351	1.90368	2.42537	0.405938	2.16463	0.614462	0.4659	1.82096	4.0555	0.146	1.0275	NA	NA	NA	0.575758	0.462664	1.15365	1.04004	2.45511	3.73929	0.891841	0.2065	0.530163	2.86301	0.527064	1.547	0.2032	0.1988	2.16695
MIMAT0002170	NA	NA	NA	NA	NA	NA	NA	NA	NA	NA	NA	NA	NA	NA	NA	NA	NA	NA	NA	NA	NA	NA	NA	NA	NA	NA	NA	NA	NA	NA	NA	NA	NA	NA	NA	NA	NA	NA	NA	NA	NA	NA	NA	NA	NA	0.1324	NA	NA	NA
MIMAT0002171	3.4132	4.3248	2.36559	7.40362	3.44095	2.5085	2.74702	4.96	1.4913	1.7931	1.5422	2.37774	2.6456	2.3984	2.7884	0.3723	3.20388	3.18494	4.20519	4.28286	2.22045	0.9365	2.4802	2.5137	3.0418	2.5308	1.0999	3.42908	2.84743	2.80005	4.78718	2.31874	2.83341	3.06361	3.17164	3.21997	4.5417	2.94283	2.73632	4.69578	1.9455	3.95083	3.4289	2.9897	4.19727	4.13968	2.0622	4.26114	2.74679
MIMAT0002176	2.92964	3.66085	1.3279	4.24304	1.59935	0.8605	1.62987	5.05223	NA	0.6928	1.10268	2.46473	0.967761	1.1741	2.2509	NA	2.89804	1.69967	2.31675	3.27485	1.99068	1.09916	1.52283	1.392	2.81339	1.76098	0.965661	2.31638	2.17077	0.4	1.99479	0.2888	1.38549	NA	1.78758	1.53119	1.78641	1.40213	2.02423	3.41659	0.963913	2.08116	1.3105	2.66466	1.54151	3.35418	0.5398	3.25855	1.18225
MIMAT0002177	4.65936	4.11698	7.14431	8.03359	3.23418	8.63676	5.33026	10.9008	5.2735	5.60493	8.94959	9.71002	7.62962	7.07897	8.52933	6.68268	5.20128	7.35756	6.85687	7.4293	10.1404	5.77317	5.32684	9.79385	6.32763	6.41661	6.39389	7.1474	8.49143	8.79028	6.02229	9.86649	7.58921	6.31699	7.2266	7.11102	7.06088	7.23591	5.03813	5.25818	5.81571	6.74588	5.63513	7.50183	7.82514	6.78245	7.06876	5.43991	5.36817
MIMAT0002174	6.02813	5.01611	5.9669	5.83325	6.06241	5.97239	6.97866	7.83916	5.35234	4.88563	6.63371	6.34103	5.53619	5.90228	5.68619	4.67721	5.62665	5.35036	6.38344	6.85618	6.5387	6.89065	5.80081	5.58825	6.07007	6.81045	5.37829	6.81322	6.23841	3.66866	5.24286	5.16157	6.47646	4.69831	6.16898	5.98594	5.0904	5.94921	5.21357	5.04978	4.96038	5.85249	4.9146	5.70426	4.40177	6.21402	5.16745	5.61978	6.19052
MIMAT0002175	1.0726	0.1532	NA	0.3516	NA	NA	NA	4.42891	NA	0.2696	NA	NA	0.1628	NA	0.6202	NA	0.3711	NA	0.649739	0.2445	NA	NA	NA	0.2172	0.1814	0.3397	NA	NA	0.1823	0.4	0.1761	NA	NA	0.2141	0.86192	0.4626	0.3161	NA	0.3057	0.4976	NA	NA	0.374203	0.3415	0.371899	NA	NA	0.669999	NA
MIMAT0002178	0.8698	0.1532	NA	1.6814	0.3674	NA	0.652	NA	NA	NA	0.8196	NA	0.1628	0.8106	NA	NA	NA	0.5357	1.0961	0.9436	0.5436	NA	NA	0.2172	0.7398	NA	0.4659	1.2913	0.4897	0.146	0.1761	NA	NA	0.4006	0.5757	0.8124	NA	0.769	1.12432	1.4045	NA	0.3871	NA	1.1386	0.3718	1.22987	0.381281	0.3735	NA
MIMAT0018104	NA	NA	0.811703	NA	0.659972	NA	0.2515	0.7525	NA	0.4967	NA	NA	NA	0.3234	NA	0.1981	NA	0.2926	0.2505	NA	NA	NA	NA	NA	0.1814	NA	NA	0.4456	NA	NA	NA	NA	0.4033	0.2141	0.408219	NA	0.3161	0.1601	0.772256	0.866825	NA	NA	NA	0.341444	0.1979	0.1324	0.5398	NA	0.3976
MIMAT0019982	NA	NA	0.4622	NA	0.6599	NA	0.2515	NA	NA	NA	0.6542	NA	NA	NA	NA	0.1981	NA	NA	0.2505	0.4534	0.2972	NA	NA	0.2172	0.1814	0.6145	0.817539	NA	0.344127	NA	0.1761	0.529319	0.4033	0.4006	0.4081	0.2498	0.575236	0.555289	0.3057	NA	0.131	0.2065	0.374203	NA	NA	0.2536	0.2032	0.1988	NA
MIMAT0019981	NA	0.1532	0.4622	NA	0.6599	NA	0.465597	NA	NA	0.496664	0.46732	NA	NA	NA	NA	0.667952	0.3711	NA	0.2505	0.797949	NA	NA	NA	NA	0.1814	0.845173	NA	NA	NA	NA	0.333024	NA	0.4033	NA	NA	NA	0.3161	0.1601	NA	NA	0.251089	0.38711	NA	0.48603	NA	0.1324	0.812522	0.1988	0.3976
MIMAT0018107	NA	0.1532	NA	NA	NA	0.493416	0.2515	1.2445	1.06127	0.2696	2.38062	0.977235	NA	NA	NA	0.372254	0.3711	0.2926	0.463872	0.2445	0.54351	0.543004	0.502128	0.2172	0.619103	0.614462	NA	1.66511	0.1823	0.146	0.47452	NA	NA	NA	0.408219	0.2498	NA	0.66606	0.3057	1.51262	0.361945	NA	0.530163	0.1808	0.1979	NA	0.381281	0.373494	1.53801
MIMAT0018101	1.0726	2.36293	1.86517	2.87708	4.13179	1.01404	1.87431	0.7525	1.06136	1.40262	2.79252	1.96555	3.00895	0.587415	1.88193	1.12282	0.666009	1.36391	1.43648	4.28287	1.71707	2.35398	2.1146	1.09566	1.3828	3.471	0.4659	3.27576	3.60661	0.4	2.17153	2.18451	2.37648	1.37861	5.04625	2.19901	1.68012	2.17646	1.40698	2.62012	3.28475	1.58514	2.48255	0.848943	1.46666	2.51326	1.95376	3.21335	3.05294
MIMAT0018102	NA	0.922966	1.09283	0.3516	0.6599	0.2677	0.651989	0.7525	NA	NA	1.10271	0.7187	0.309078	1.00368	NA	0.3723	NA	NA	0.463872	0.798006	0.54351	0.753091	NA	0.2172	0.1814	0.614462	0.465942	NA	0.3442	0.146	0.333	0.7354	0.7181	0.400494	0.575758	0.959836	0.7948	0.304195	0.557813	0.693993	1.7956	0.2065	0.374203	0.341444	0.3718	0.566057	0.381281	0.1988	NA
MIMAT0018103	NA	0.1532	NA	0.3516	0.3674	NA	0.2515	NA	NA	NA	0.2525	NA	NA	NA	NA	0.1981	NA	0.2926	NA	NA	NA	NA	NA	0.2172	NA	NA	NA	NA	NA	NA	0.333024	NA	NA	0.4006	0.2185	0.2498	0.3161	NA	NA	NA	0.464897	NA	0.3741	0.48603	0.371899	NA	0.2032	NA	NA
MIMAT0018108	NA	0.1532	NA	0.634082	NA	NA	0.2515	NA	NA	NA	NA	NA	NA	NA	NA	NA	NA	NA	NA	0.797949	0.2972	0.2969	NA	NA	0.1814	NA	NA	0.7856	0.854627	NA	NA	NA	NA	0.2141	NA	NA	NA	NA	0.772256	NA	NA	NA	NA	0.3415	NA	0.2536	0.2032	0.1988	NA
MIMAT0018109	NA	NA	NA	NA	NA	NA	NA	NA	NA	NA	NA	NA	NA	NA	NA	NA	NA	NA	NA	NA	NA	NA	NA	NA	NA	NA	NA	NA	NA	NA	NA	NA	NA	NA	NA	NA	NA	NA	NA	NA	NA	NA	NA	NA	NA	NA	NA	NA	NA
MIMAT0005876	0.3514	NA	NA	NA	NA	NA	NA	NA	NA	NA	0.46732	NA	NA	NA	NA	NA	NA	NA	NA	NA	NA	NA	0.5022	NA	NA	NA	0.2517	NA	NA	NA	NA	NA	NA	NA	NA	NA	NA	NA	NA	NA	NA	NA	NA	NA	NA	NA	NA	NA	NA
MIMAT0005877	NA	NA	NA	NA	NA	NA	NA	NA	NA	NA	NA	NA	NA	NA	NA	NA	NA	NA	0.2505	NA	NA	NA	NA	NA	NA	NA	NA	NA	0.344127	NA	NA	NA	0.4033	0.2141	0.408219	NA	NA	0.1601	NA	NA	NA	NA	NA	NA	NA	NA	NA	NA	NA
MIMAT0005874	0.3514	NA	NA	0.870137	0.3674	0.2677	0.4656	NA	0.446	0.692834	0.968134	0.4037	0.309078	0.587415	NA	0.1981	0.666009	0.925476	NA	NA	0.54351	NA	1.02915	0.4059	NA	0.3397	0.6524	NA	0.958226	0.146	0.1761	0.2888	0.4033	0.7137	1.39771	0.2498	0.794806	0.435195	0.959	0.4976	0.251089	0.692	0.916952	NA	0.1979	0.1324	NA	0.373494	0.708964
MIMAT0005875	0.8698	0.534194	0.4622	0.8701	1.73115	0.86047	0.651989	NA	0.446	0.2696	1.63398	0.4037	0.563481	0.3234	NA	0.79578	NA	NA	0.814349	0.635936	NA	0.2969	0.502128	0.2172	0.619088	0.3397	0.652407	0.7856	0.4897	0.146	0.1761	0.529319	0.718139	0.713711	1.10049	0.648122	0.985331	0.865176	0.3057	NA	0.464888	0.38711	0.1992	0.61739	0.66723	0.469306	0.539793	0.1988	1.18225
MIMAT0005878	4.42013	6.92493	5.96692	4.76627	5.83947	5.27524	5.39042	3.49437	6.63199	5.19172	3.1127	5.77069	5.22204	3.59189	6.36883	3.36098	4.89483	5.53657	5.01289	6.19012	4.04938	6.92905	6.69233	4.31067	4.86475	5.92444	4.2702	5.1884	6.64218	4.22353	6.68698	4.35761	5.47696	5.97555	4.22159	5.58703	6.22836	6.40973	5.90108	6.47121	5.83741	4.6705	6.14097	4.15575	5.58164	4.62866	5.22693	6.82403	7.81607
MIMAT0005879	NA	0.1532	NA	NA	NA	NA	NA	NA	NA	NA	NA	NA	NA	NA	NA	NA	NA	NA	NA	NA	NA	NA	NA	NA	NA	NA	NA	NA	NA	NA	NA	NA	NA	NA	NA	NA	NA	NA	NA	NA	NA	NA	NA	0.1808	NA	NA	NA	NA	NA
MIMAT0019851	NA	NA	NA	NA	NA	NA	NA	NA	NA	NA	NA	NA	NA	NA	NA	NA	NA	NA	NA	NA	NA	NA	NA	NA	NA	NA	NA	NA	NA	NA	NA	NA	NA	NA	NA	NA	NA	NA	NA	NA	NA	NA	NA	0.1808	NA	NA	NA	NA	NA
MIMAT0019850	1.90997	2.12435	2.13699	0.3516	0.903037	1.69731	1.79732	2.14519	2.83975	2.75561	1.10263	2.37772	1.59989	1.46423	1.05254	1.5428	1.11997	0.2926	2.37064	2.6253	1.24649	3.63499	1.52284	2.19343	2.28847	0.845206	1.10001	NA	2.12694	NA	1.94711	0.2888	0.4033	NA	NA	1.78966	1.15365	2.38538	1.64337	1.28776	0.361945	0.3871	2.52026	0.848912	0.667311	1.4489	2.1631	2.40193	3.05293
MIMAT0019853	NA	NA	NA	NA	NA	NA	NA	NA	NA	NA	NA	NA	NA	NA	NA	NA	NA	NA	NA	NA	NA	NA	NA	NA	NA	NA	NA	NA	NA	NA	NA	NA	NA	NA	NA	NA	NA	NA	NA	NA	NA	NA	NA	0.1808	NA	NA	NA	NA	NA
MIMAT0019852	NA	NA	NA	NA	NA	NA	NA	NA	NA	NA	NA	NA	NA	NA	NA	NA	0.3711	NA	NA	NA	0.2972	NA	NA	NA	NA	NA	NA	NA	0.344127	NA	0.1761	0.2888	NA	NA	NA	NA	NA	NA	NA	NA	0.131	NA	NA	NA	0.1979	NA	NA	NA	NA
MIMAT0019855	NA	NA	NA	0.3516	NA	0.2677	NA	NA	NA	NA	NA	0.4037	NA	NA	NA	NA	NA	NA	NA	0.2445	0.753915	NA	NA	0.722349	NA	NA	NA	NA	NA	0.146	0.1761	0.2888	NA	NA	NA	0.2498	NA	NA	0.3057	NA	NA	NA	NA	NA	0.1979	0.469306	NA	NA	NA
MIMAT0019854	NA	NA	NA	NA	NA	NA	NA	NA	NA	NA	NA	NA	0.1628	NA	NA	NA	NA	NA	NA	0.2445	NA	NA	NA	NA	NA	NA	NA	NA	0.1823	NA	NA	NA	NA	NA	NA	NA	NA	NA	0.3057	NA	NA	NA	NA	NA	NA	NA	NA	NA	NA
MIMAT0019857	NA	0.1532	NA	0.634	NA	NA	0.4656	0.7525	NA	NA	NA	0.4037	NA	NA	NA	0.1981	NA	NA	NA	0.2445	NA	0.2969	0.2728	NA	NA	NA	NA	NA	0.1823	NA	0.1761	0.2888	NA	NA	NA	0.2498	0.3161	NA	NA	NA	0.131	NA	NA	NA	NA	NA	0.381281	0.1988	NA
MIMAT0019856	NA	NA	NA	1.55173	NA	0.4935	NA	2.9721	NA	NA	2.08786	0.977166	0.77984	NA	1.65464	0.3723	NA	0.5357	0.2505	0.453506	1.24652	0.2969	NA	1.78109	0.1814	0.3397	NA	NA	0.742955	0.803674	0.1761	1.4714	0.9764	NA	0.2185	0.462664	0.5752	0.3042	NA	0.2701	NA	0.2065	0.1992	0.1808	1.12163	0.365462	0.812528	0.1988	NA
MIMAT0019859	NA	NA	NA	NA	NA	NA	NA	NA	NA	NA	NA	NA	NA	0.3234	NA	NA	NA	NA	NA	NA	NA	NA	NA	NA	NA	NA	NA	NA	0.1823	NA	NA	NA	0.4033	NA	NA	NA	NA	0.1601	NA	NA	0.131	NA	0.1992	NA	NA	NA	NA	NA	NA
MIMAT0019858	NA	NA	NA	NA	NA	NA	NA	NA	NA	0.496664	NA	NA	0.1628	0.3234	NA	NA	0.3711	NA	NA	0.453506	NA	0.2969	NA	NA	NA	NA	NA	NA	NA	NA	0.4745	NA	0.4033	0.2141	0.2185	0.2498	NA	NA	NA	NA	NA	NA	NA	NA	NA	NA	0.2032	NA	NA
MIMAT0022833	NA	NA	0.4622	NA	0.3674	0.493416	0.651991	1.24453	NA	NA	1.54226	1.19623	0.1628	NA	NA	0.527631	0.666009	NA	0.2505	1.41244	0.753837	0.5429	NA	0.2172	0.1814	0.3397	0.817533	0.78556	0.489685	NA	0.1761	NA	0.976396	0.2141	0.2185	0.2498	0.985358	0.955187	1.12431	0.866832	0.464888	0.2065	0.374203	0.61739	0.527064	0.566057	0.2032	0.529306	NA
MIMAT0015036	NA	NA	NA	NA	NA	NA	NA	1.6107	NA	NA	0.2525	NA	NA	NA	NA	NA	NA	NA	NA	NA	NA	NA	NA	NA	NA	NA	NA	NA	NA	NA	NA	NA	NA	NA	NA	NA	NA	NA	NA	NA	NA	NA	NA	NA	NA	NA	NA	NA	NA
MIMAT0000736	6.24822	6.6806	3.38404	5.36757	5.46629	3.58637	5.55137	4.06584	3.69552	3.57171	2.90736	3.95685	4.43769	4.19696	4.00356	1.30573	4.76075	5.04118	5.56858	5.72993	4.53552	3.4958	4.73359	3.91961	5.06856	5.54421	3.28785	5.06905	4.35996	4.15621	5.13506	3.74522	4.69113	4.0602	4.3075	5.60956	6.17065	4.34788	4.56402	4.96669	4.05218	5.1168	3.81003	5.39657	5.43739	5.03612	4.07734	5.20003	4.10302
MIMAT0000737	4.73602	4.39559	2.96291	4.01584	3.72029	2.15918	3.86012	3.09273	2.5134	1.40264	2.08783	3.07483	1.99533	2.7613	3.09082	0.795769	3.9698	3.1488	4.09746	4.41358	3.55496	2.14629	2.97622	2.24379	3.67701	4.14775	2.14744	3.73377	3.02507	2.06884	3.69402	2.1845	2.76664	3.0636	3.32074	3.48641	3.78003	3.293	3.01423	4.19356	2.78526	3.73444	2.32096	4.7061	2.75121	4.31009	1.49316	3.59484	2.74678
MIMAT0000734	0.3514	0.923018	NA	3.07902	NA	0.2677	0.651991	NA	0.446	NA	NA	NA	0.1628	NA	NA	NA	0.6661	0.743723	0.649739	0.943643	0.5436	0.2969	0.5022	0.2172	NA	0.614462	0.2517	0.78556	0.1823	0.146	1.02755	0.9156	NA	0.565539	0.725893	NA	0.794806	0.3042	0.5577	0.2701	0.251089	0.38711	0.1992	0.617363	0.3718	0.253664	NA	0.67	0.3976
MIMAT0000735	NA	NA	0.4622	1.68148	0.3674	NA	0.2515	NA	NA	NA	NA	NA	NA	NA	NA	NA	NA	NA	0.4639	0.2445	NA	NA	NA	0.2172	0.1814	NA	NA	0.4456	NA	NA	0.333	0.2888	0.4033	NA	0.2185	0.2498	NA	NA	0.5577	0.2701	NA	0.3871	NA	0.6174	NA	0.2536	NA	0.1988	NA
MIMAT0000732	6.9119	6.19015	7.82765	8.01531	9.23055	7.71583	6.92765	13.3241	7.91846	7.50798	8.56424	9.39208	7.55268	8.32041	9.05444	9.69533	6.50412	5.71392	7.16969	8.15292	7.77794	8.39004	6.45961	6.97452	7.88589	7.58606	6.73582	8.73419	7.68112	8.73	7.0583	9.43868	6.95277	7.20531	7.99833	6.42734	8.28017	6.3632	7.16526	6.11184	7.2035	8.07504	7.3137	6.94297	8.56911	6.79749	7.60884	7.34435	6.5098
MIMAT0000733	9.66802	9.81331	7.00706	10.5777	8.81074	6.70862	9.49322	6.77954	6.81024	6.67086	7.0465	7.70682	7.6512	7.4772	7.94844	4.07886	8.65955	8.32919	9.02394	9.47593	8.23216	7.18827	8.19297	6.97078	8.82137	9.17001	6.66171	9.35673	7.78351	7.61025	9.88971	7.94827	8.5032	8.52263	9.09247	8.84482	9.44632	8.56513	7.80585	9.42619	7.55153	8.80834	7.9716	9.22582	8.71652	9.10748	7.91403	8.7949	8.18512
MIMAT0000730	1.68095	1.15832	0.4622	NA	0.3674	0.688622	1.71608	NA	NA	0.2696	NA	0.718783	0.4419	1.00376	NA	NA	0.3711	1.3639	1.43646	1.07589	1.24648	NA	NA	NA	1.14131	1.21879	0.652443	1.06049	0.1823	NA	0.474542	NA	0.718139	NA	0.4081	1.53124	0.794806	0.66606	1.12432	1.70713	0.464888	1.25393	NA	1.76695	0.371899	0.899173	NA	0.798032	NA
MIMAT0000731	5.4143	5.09391	6.06784	5.88132	7.12537	5.59424	5.78361	10.6552	5.20423	4.90556	7.56802	7.75287	6.40122	5.90223	6.65685	6.49525	4.28409	4.00572	5.247	7.0435	5.68177	7.13063	5.01942	4.9491	6.0263	6.90293	4.84923	6.03151	6.23837	4.45839	5.03011	5.90028	6.08239	4.19232	5.15617	5.18385	5.38914	5.69848	5.10895	4.93789	5.42045	6.19312	4.40131	5.19575	6.29124	5.44863	5.36572	5.77964	4.49691
MIMAT0000738	NA	NA	0.4622	NA	NA	0.493416	NA	NA	NA	NA	NA	NA	NA	NA	NA	NA	NA	NA	NA	NA	NA	NA	NA	NA	NA	NA	NA	NA	0.3442	NA	NA	NA	NA	NA	2.71338	0.2498	NA	NA	NA	NA	2.04857	NA	NA	NA	NA	NA	NA	NA	NA
MIMAT0010251	NA	0.417953	0.4622	NA	NA	NA	NA	NA	NA	NA	0.4673	0.4037	0.675727	NA	NA	NA	NA	NA	NA	1.98344	1.50092	0.2969	NA	0.572783	NA	NA	NA	NA	NA	NA	NA	0.2888	NA	NA	0.575758	1.09369	0.3161	NA	1.40712	NA	NA	1.05463	0.670923	0.3415	NA	NA	0.2032	0.529301	0.3976
MIMAT0000280	8.70925	6.87076	8.02462	8.94625	7.58581	9.73534	10.4237	4.99139	5.68254	5.89129	8.56275	8.75922	8.36661	8.72349	8.15281	7.32054	7.76103	8.06181	9.45931	7.6133	8.57104	7.45005	7.57472	8.98545	8.20108	9.69485	7.11873	8.45057	7.64467	6.70046	7.13356	7.58014	9.85428	6.70112	5.97636	7.50552	7.62358	10.3089	7.69517	8.25237	6.08176	8.39817	6.14101	9.66417	8.62168	9.06775	6.96255	7.40603	8.56586
MIMAT0000281	5.48707	6.45064	2.36559	1.68146	6.70379	6.34237	5.03581	3.40394	3.33015	5.07339	2.7106	3.72994	5.91893	3.5615	3.95444	5.189	2.43308	4.06504	6.28862	7.68106	6.16836	6.18917	4.89373	5.93708	7.03444	5.43337	7.48227	6.04739	6.32335	3.06165	5.63456	2.11235	6.05463	2.17642	5.22087	4.89398	3.75408	6.22297	4.50524	3.00022	2.14475	6.3374	3.86967	5.51503	4.64153	2.91371	5.47273	8.2405	1.37111
MIMAT0002828	NA	NA	NA	NA	NA	NA	NA	NA	NA	NA	NA	NA	NA	NA	NA	NA	NA	NA	NA	NA	NA	NA	NA	NA	0.1814	NA	NA	NA	NA	NA	NA	NA	NA	NA	NA	NA	NA	NA	NA	NA	NA	0.3871	NA	NA	NA	NA	NA	NA	NA
MIMAT0002829	NA	NA	NA	NA	NA	NA	NA	NA	NA	NA	0.2525	NA	NA	NA	NA	NA	NA	NA	NA	NA	NA	NA	NA	NA	NA	NA	NA	NA	NA	NA	NA	NA	NA	NA	NA	NA	NA	NA	NA	NA	NA	NA	NA	NA	NA	NA	NA	NA	NA
MIMAT0022939	NA	NA	NA	NA	NA	NA	NA	0.7525	NA	NA	NA	NA	NA	NA	NA	NA	NA	NA	NA	NA	NA	NA	NA	NA	NA	NA	0.2517	NA	NA	NA	NA	NA	NA	NA	NA	NA	NA	NA	NA	NA	0.131	0.2065	NA	NA	NA	NA	0.2032	NA	NA
MIMAT0002824	NA	NA	NA	NA	NA	NA	NA	0.7525	NA	NA	0.2525	NA	NA	NA	NA	NA	NA	NA	NA	NA	NA	NA	NA	NA	NA	NA	NA	NA	0.1823	NA	NA	NA	NA	NA	NA	NA	NA	NA	NA	NA	0.131	0.69201	NA	NA	NA	NA	NA	NA	NA
MIMAT0002825	NA	NA	NA	NA	NA	NA	NA	0.7525	NA	NA	0.2525	NA	NA	NA	NA	NA	NA	NA	NA	NA	NA	NA	NA	NA	NA	NA	NA	NA	NA	NA	NA	NA	NA	NA	NA	NA	NA	NA	NA	NA	NA	0.823266	NA	NA	NA	NA	NA	NA	NA
MIMAT0002826	NA	NA	NA	NA	NA	NA	NA	NA	NA	NA	1.54231	0.4037	NA	NA	NA	NA	NA	NA	NA	NA	NA	NA	NA	NA	NA	NA	NA	NA	0.1823	NA	NA	NA	NA	NA	NA	NA	NA	NA	NA	NA	0.131	0.547604	NA	0.1808	NA	NA	NA	NA	NA
MIMAT0002827	NA	NA	NA	NA	NA	NA	0.2515	1.2445	NA	NA	0.968149	NA	NA	NA	NA	NA	NA	NA	NA	NA	NA	NA	0.2728	NA	NA	NA	NA	NA	0.1823	NA	NA	NA	NA	NA	NA	NA	NA	NA	NA	NA	0.131	0.692014	NA	NA	NA	NA	NA	NA	NA
MIMAT0002820	4.36326	3.75959	4.07546	3.21384	4.47056	5.92479	5.20178	4.47408	4.38724	4.42947	1.87865	4.84626	5.39998	4.56183	4.85455	3.27583	4.71311	4.79469	4.6486	6.25433	4.52123	3.01475	3.18877	4.03849	4.98559	4.9787	3.89843	2.76339	4.36939	3.89211	4.32788	4.0647	4.39202	2.91847	4.3997	4.97426	3.75408	4.00183	4.31308	3.44417	2.59412	5.09099	4.4013	4.77804	3.76988	4.76749	3.41681	3.5038	3.15922
MIMAT0002821	3.21312	5.80428	3.70967	4.6757	3.36175	5.2676	5.20177	2.14514	5.32653	5.26292	2.66789	4.54086	5.85192	4.43348	4.26771	2.78421	5.93405	5.27694	3.41561	4.95016	3.61	3.68707	3.75377	4.28684	4.68854	3.66465	5.18018	2.20753	5.97042	3.55558	4.01684	4.3885	3.79704	3.58991	4.59782	4.69778	5.24746	4.49022	4.39631	6.11185	5.01233	4.53345	5.29241	4.36652	4.59842	6.45274	2.9364	2.84926	4.88561
MIMAT0002822	NA	NA	NA	NA	NA	NA	NA	NA	NA	NA	1.63401	NA	NA	NA	NA	NA	NA	NA	NA	0.2445	NA	NA	0.2728	NA	NA	NA	NA	NA	0.1823	NA	NA	NA	NA	NA	NA	NA	NA	NA	NA	NA	NA	0.823279	NA	NA	NA	NA	NA	NA	NA
MIMAT0002823	0.633753	NA	0.4622	0.870207	NA	NA	0.2515	2.53424	NA	NA	2.62378	0.4037	0.1628	0.3234	NA	NA	NA	NA	NA	0.4534	NA	NA	0.699952	NA	0.1814	0.3397	0.2517	1.06052	0.621894	NA	NA	0.2888	NA	0.400494	0.725893	NA	0.3161	NA	NA	0.4976	0.361945	2.60357	NA	NA	NA	0.1324	NA	NA	NA
MIMAT0027690	NA	NA	NA	NA	NA	NA	NA	NA	NA	NA	NA	NA	NA	NA	NA	NA	NA	NA	NA	NA	NA	NA	NA	NA	0.1814	NA	NA	NA	NA	NA	NA	NA	NA	NA	NA	NA	NA	NA	NA	NA	NA	NA	NA	NA	0.1979	NA	NA	NA	NA
MIMAT0027691	NA	NA	NA	NA	NA	NA	NA	NA	NA	NA	0.2525	NA	NA	0.3234	NA	0.1981	NA	0.2926	0.2505	0.4534	0.2972	0.936525	0.502128	NA	NA	NA	0.2517	NA	0.854577	NA	NA	NA	0.4033	0.4006	NA	NA	NA	0.4352	NA	0.497518	0.2511	NA	0.1992	0.1808	NA	0.1324	NA	0.1988	NA
MIMAT0013802	NA	NA	NA	NA	NA	NA	NA	NA	NA	NA	NA	NA	NA	NA	NA	NA	NA	NA	NA	NA	NA	NA	NA	NA	NA	NA	NA	NA	NA	NA	NA	NA	NA	NA	NA	NA	NA	NA	NA	NA	NA	NA	NA	NA	NA	NA	NA	NA	NA
MIMAT0027454	NA	0.534076	NA	0.634	1.29281	0.4935	NA	NA	0.786192	1.15893	0.46732	NA	NA	0.3234	NA	NA	NA	0.2926	1.09611	0.4534	NA	0.753181	0.502128	NA	0.487436	0.845206	NA	0.4456	0.95831	NA	0.603409	0.5293	NA	0.2141	0.2185	0.2498	0.3161	NA	0.772354	NA	0.131	0.2065	0.799214	NA	NA	NA	0.682585	0.1988	1.53805
MIMAT0027455	NA	0.1532	NA	NA	NA	NA	NA	NA	NA	NA	0.4673	NA	NA	NA	NA	NA	NA	NA	NA	NA	NA	0.2969	NA	NA	NA	NA	NA	NA	0.1823	NA	NA	NA	NA	NA	NA	NA	NA	NA	NA	NA	NA	0.2065	NA	NA	NA	NA	NA	NA	NA
MIMAT0027456	NA	NA	NA	NA	NA	NA	NA	NA	NA	NA	NA	NA	NA	NA	NA	NA	NA	NA	NA	NA	NA	NA	NA	NA	NA	NA	NA	NA	NA	NA	NA	NA	NA	NA	NA	NA	NA	NA	NA	NA	NA	NA	NA	NA	NA	NA	NA	NA	NA
MIMAT0027457	NA	NA	NA	NA	NA	NA	0.2515	NA	NA	NA	NA	NA	NA	NA	NA	NA	NA	NA	NA	NA	NA	NA	NA	NA	NA	NA	NA	NA	0.1823	NA	NA	NA	NA	NA	NA	NA	NA	NA	NA	NA	NA	NA	NA	NA	NA	0.1324	NA	NA	NA
MIMAT0027450	NA	NA	NA	NA	NA	NA	NA	NA	NA	NA	NA	NA	NA	NA	NA	NA	NA	NA	NA	NA	NA	NA	NA	NA	NA	NA	NA	NA	NA	NA	NA	NA	NA	NA	NA	NA	NA	NA	NA	NA	NA	NA	NA	NA	NA	NA	NA	NA	NA
MIMAT0027103	0.3514	0.291682	1.0927	0.634	0.3674	0.2677	0.2515	NA	NA	0.692803	0.46732	0.4037	NA	0.587415	NA	0.527672	1.30265	0.2926	0.4639	0.2445	NA	0.543004	0.873949	0.2172	0.619103	NA	NA	NA	0.621894	0.61589	0.47452	0.2888	0.4033	0.847985	1.30531	NA	NA	0.666145	0.772256	0.2701	1.16078	NA	1.02586	0.1808	NA	0.1324	NA	0.373494	0.708964
MIMAT0027452	NA	NA	NA	NA	NA	NA	NA	NA	NA	NA	0.4673	NA	NA	NA	NA	NA	NA	NA	NA	NA	NA	NA	NA	NA	NA	NA	NA	NA	NA	NA	NA	NA	0.4033	NA	NA	NA	NA	NA	0.557813	NA	NA	NA	NA	NA	NA	NA	NA	NA	NA
MIMAT0027453	NA	NA	NA	NA	NA	NA	NA	NA	NA	NA	NA	NA	NA	0.3234	NA	NA	NA	NA	NA	NA	NA	NA	NA	NA	0.1814	NA	NA	NA	NA	NA	NA	NA	NA	NA	NA	NA	NA	NA	NA	NA	NA	NA	NA	NA	NA	NA	NA	NA	NA
MIMAT0027458	NA	0.1532	NA	NA	0.659972	NA	0.465597	0.7525	NA	NA	0.65426	NA	0.1628	NA	NA	NA	NA	NA	NA	NA	NA	0.543004	NA	NA	0.1814	NA	NA	NA	NA	NA	0.1761	NA	0.4033	NA	NA	NA	NA	NA	0.3057	0.497518	0.251089	0.2065	NA	0.1808	NA	NA	NA	NA	NA
MIMAT0027459	NA	NA	NA	0.3516	NA	NA	NA	NA	NA	NA	NA	0.4037	NA	0.3234	NA	NA	NA	NA	NA	NA	NA	NA	NA	0.2172	NA	NA	NA	NA	0.1823	NA	NA	NA	NA	NA	NA	NA	NA	NA	NA	NA	NA	NA	NA	NA	NA	NA	NA	NA	NA
MIMAT0027678	NA	NA	NA	NA	NA	NA	NA	NA	NA	NA	NA	NA	NA	NA	NA	NA	NA	NA	NA	NA	NA	NA	NA	NA	NA	NA	NA	NA	NA	NA	NA	NA	NA	NA	NA	NA	NA	NA	NA	NA	NA	NA	NA	0.1808	NA	NA	NA	NA	NA
MIMAT0004702	2.7637	2.92752	3.4353	4.61205	4.76021	3.89399	3.9158	3.94279	3.47822	4.6697	2.97909	3.69439	3.73409	3.29222	4.34601	2.81469	2.89806	3.28814	3.38975	4.19829	3.94609	4.28581	2.24701	3.46885	4.01258	4.52579	4.00503	3.73378	4.10148	3.31433	4.91063	3.76886	3.1277	4.08758	4.23419	3.58063	3.14379	3.40908	4.9528	4.14398	2.42566	3.51898	4.12354	3.62635	3.93148	3.50837	5.02058	2.2756	5.19148
MIMAT0004701	5.13743	1.92596	3.94005	4.57911	1.73118	4.34853	5.68023	3.80825	5.08617	1.61104	3.78798	4.69262	3.11222	1.91242	4.8811	0.795769	1.8641	3.25456	3.19433	2.58152	2.74832	4.0071	3.63794	3.33588	1.981	3.32575	2.7479	2.41749	3.57436	4.19027	4.82071	4.76286	4.09811	4.33641	2.03783	2.00882	3.46505	4.36441	0.959	1.02121	1.71435	1.97215	5.20829	2.0719	2.87198	4.18612	2.61882	1.47159	3.80846
MIMAT0004700	1.4086	1.83832	2.96286	1.80061	1.85204	1.94661	2.74705	3.40399	1.82209	2.294	2.43259	3.0748	1.70935	2.52976	1.88191	1.54275	2.58191	2.3983	2.4226	3.79968	2.0713	2.88697	2.0435	2.03087	2.75723	3.07621	1.6307	2.97741	2.64472	0.712802	1.89768	1.78149	2.54542	1.46472	2.94541	2.60972	1.56544	2.35257	2.97151	2.66764	2.17542	2.3659	2.79097	2.3615	1.54148	2.33236	1.83645	1.68542	3.3509
MIMAT0000462	NA	0.534076	NA	0.3516	NA	0.2677	NA	NA	0.786192	NA	0.2525	NA	NA	0.5875	NA	0.1981	NA	0.5357	NA	NA	0.7539	NA	NA	1.5604	1.3828	NA	NA	1.4903	NA	0.146	0.1761	0.735394	NA	NA	NA	NA	0.3161	0.4351	NA	NA	NA	NA	NA	0.3415	0.1979	0.3655	NA	NA	NA
MIMAT0027675	0.3514	0.1532	NA	NA	NA	NA	NA	1.2445	NA	0.2696	NA	NA	NA	NA	NA	NA	NA	NA	NA	NA	NA	0.2969	NA	NA	NA	NA	NA	NA	NA	NA	NA	NA	NA	NA	NA	NA	NA	0.1601	NA	NA	NA	NA	NA	NA	NA	0.1324	NA	NA	NA
MIMAT0000460	10.9812	8.20781	11.6367	7.13286	6.58241	8.73395	5.86126	11.4451	7.60605	7.81094	13.0468	12.2921	7.52679	7.84989	6.34996	7.66727	6.38265	6.99274	7.57742	7.08923	7.81217	7.20625	12.6236	7.58161	6.54191	6.60148	6.96871	5.94096	8.64544	6.45631	6.07883	6.95409	10.8675	5.6883	7.29731	6.58054	6.00995	13.4311	7.64164	6.50103	9.32572	6.36725	6.56529	6.54322	7.01318	7.11507	6.69833	7.13436	7.83425
MIMAT0000461	4.86447	4.07927	5.14412	5.73952	5.04003	6.8222	5.46696	1.90257	5.13157	5.77162	3.20526	4.56072	6.12566	5.25533	5.7452	3.42169	5.38469	5.34236	5.60271	5.58203	5.16091	3.55306	2.93757	5.00123	5.45533	4.74158	4.58853	4.85123	4.38807	6.71665	5.9605	6.81906	4.20287	5.09944	5.3935	5.77804	4.84199	4.54205	4.89671	4.47311	2.989	5.40046	5.37709	4.91204	5.89489	5.34326	5.31725	3.16663	4.97562
MIMAT0027670	NA	NA	NA	NA	NA	NA	NA	0.7525	NA	NA	NA	NA	NA	NA	NA	0.1981	NA	NA	NA	NA	NA	NA	NA	NA	NA	NA	NA	NA	NA	NA	NA	NA	NA	NA	NA	NA	NA	NA	NA	NA	NA	NA	NA	NA	NA	NA	NA	NA	NA
MIMAT0027671	0.6337	0.291682	NA	NA	0.3674	0.2677	NA	NA	0.446	NA	NA	NA	NA	0.3234	0.6202	NA	NA	0.2926	NA	0.7979	NA	0.5429	0.5022	NA	0.1814	0.3397	NA	NA	0.3442	NA	NA	0.2888	NA	NA	0.2185	0.2498	0.3161	0.4352	NA	NA	0.131	NA	NA	0.1808	NA	0.1324	NA	NA	0.3976
MIMAT0027672	NA	NA	NA	NA	NA	NA	NA	NA	NA	NA	NA	NA	NA	NA	NA	NA	NA	NA	NA	0.4534	NA	NA	NA	NA	NA	NA	NA	NA	NA	NA	NA	NA	NA	NA	NA	NA	NA	NA	NA	NA	NA	NA	NA	NA	NA	NA	NA	NA	NA
MIMAT0027673	NA	NA	NA	NA	NA	NA	0.2515	NA	NA	NA	NA	0.4037	NA	NA	NA	NA	NA	NA	NA	NA	NA	NA	NA	NA	0.342518	NA	NA	NA	NA	NA	NA	NA	NA	NA	NA	NA	NA	NA	NA	NA	NA	NA	NA	NA	NA	NA	NA	NA	NA
MIMAT0025473	NA	NA	NA	NA	NA	0.2677	NA	NA	NA	NA	NA	NA	NA	NA	NA	NA	NA	NA	NA	NA	NA	NA	NA	NA	NA	NA	NA	NA	NA	NA	NA	NA	NA	NA	0.2185	NA	NA	NA	NA	0.2701	NA	NA	NA	NA	0.1979	NA	NA	NA	NA
MIMAT0000510	8.52929	7.6039	8.63198	9.0217	8.89137	8.79418	7.66034	10.2724	7.74167	8.1722	7.04441	9.79685	9.26006	9.39608	9.2731	7.57896	8.73501	8.69667	8.52692	8.70337	8.78445	8.7514	7.75374	8.81069	8.73468	7.7534	7.51268	9.28573	7.94361	7.76233	8.98844	9.20135	8.58669	6.86456	8.51914	8.61093	8.22335	9.13155	8.94412	7.75615	7.21834	7.74741	9.28583	8.81089	7.76694	8.3721	8.37277	6.79361	9.16681
MIMAT0019226	NA	NA	NA	NA	0.3674	NA	NA	NA	NA	NA	NA	NA	NA	NA	NA	NA	NA	NA	NA	NA	NA	NA	NA	NA	NA	NA	NA	NA	NA	NA	NA	NA	NA	NA	NA	NA	NA	NA	NA	NA	NA	0.2065	NA	0.1808	NA	NA	NA	NA	NA
MIMAT0019227	NA	NA	NA	NA	NA	NA	NA	NA	NA	NA	NA	NA	NA	NA	NA	NA	NA	NA	NA	NA	NA	NA	NA	NA	NA	NA	NA	NA	NA	NA	0.1761	NA	NA	NA	NA	NA	NA	NA	NA	NA	NA	NA	NA	NA	NA	0.3655	NA	NA	NA
MIMAT0019224	NA	NA	NA	NA	NA	NA	NA	NA	NA	NA	NA	NA	NA	NA	NA	NA	NA	NA	NA	NA	NA	NA	NA	NA	NA	NA	NA	NA	NA	NA	NA	NA	NA	NA	NA	NA	NA	NA	NA	0.2701	NA	NA	NA	NA	NA	NA	NA	NA	NA
MIMAT0019225	0.3514	0.534125	NA	0.3516	NA	NA	0.465597	NA	NA	3.06987	NA	NA	0.1628	0.3234	NA	NA	NA	0.2926	NA	0.453506	NA	0.753091	NA	0.2172	0.851121	1.04403	0.2517	NA	0.489685	NA	0.474542	0.529319	0.718139	0.2141	0.575758	NA	NA	0.555293	NA	NA	0.131	NA	0.1992	0.1808	NA	0.469271	0.2032	NA	NA
MIMAT0019222	NA	NA	NA	NA	NA	NA	NA	NA	NA	NA	0.2525	NA	NA	NA	NA	NA	NA	NA	NA	NA	NA	NA	NA	NA	NA	NA	NA	NA	NA	NA	NA	NA	NA	NA	NA	NA	NA	NA	NA	NA	NA	NA	NA	NA	NA	NA	0.2032	NA	NA
MIMAT0019223	NA	NA	NA	NA	NA	NA	NA	NA	NA	NA	0.4673	NA	NA	NA	NA	NA	NA	NA	NA	NA	NA	NA	NA	NA	NA	NA	NA	NA	NA	NA	NA	NA	NA	NA	0.2185	NA	NA	NA	NA	NA	NA	NA	NA	NA	NA	NA	NA	NA	NA
MIMAT0019220	NA	NA	NA	NA	NA	NA	NA	NA	NA	NA	0.46732	NA	0.1628	NA	NA	NA	NA	NA	NA	NA	NA	0.5429	0.2728	NA	NA	NA	NA	NA	0.1823	0.146	0.1761	NA	0.4033	0.2141	NA	NA	NA	0.1601	0.3057	NA	NA	NA	0.1992	0.341444	0.1979	0.2536	NA	0.1988	0.964942
MIMAT0019221	0.869743	1.64528	0.4622	1.073	2.63687	1.01404	0.817041	NA	NA	0.6928	0.9681	0.7187	1.65571	NA	NA	0.5277	NA	0.535746	0.9621	2.48964	0.2972	0.9365	0.5022	0.722273	0.3425	1.21874	0.9656	2.2075	2.21331	0.803735	1.79347	0.2888	1.1954	0.8481	2.20058	0.6481	1.4408	0.955187	0.772256	1.1606	1.90949	0.5476	1.47321	0.6174	1.30444	1.34351	1.2395	2.40199	1.8232
MIMAT0019228	NA	NA	NA	NA	0.3674	NA	NA	NA	NA	NA	NA	NA	NA	NA	NA	NA	NA	NA	NA	NA	0.2972	NA	NA	NA	NA	NA	NA	NA	NA	NA	NA	NA	NA	NA	NA	NA	NA	NA	NA	NA	NA	0.2065	NA	NA	NA	NA	NA	NA	NA
MIMAT0019229	0.633753	0.534076	0.4622	NA	1.73119	NA	0.817036	3.65986	0.7863	0.2696	1.3391	0.7187	NA	NA	0.6202	0.1981	NA	1.79621	1.21865	NA	NA	1.09917	0.502128	0.2172	0.342518	1.21874	0.6524	0.7856	0.489685	0.146	0.47452	0.2888	0.9764	0.847967	NA	0.2498	0.3161	1.03995	0.3057	1.1606	1.09811	0.2065	1.22169	0.1808	NA	0.566136	0.682591	1.12574	0.708964
MIMAT0003948	NA	NA	NA	NA	NA	0.2677	0.2515	NA	NA	NA	NA	NA	NA	NA	NA	NA	0.3711	NA	0.2505	NA	NA	NA	NA	NA	NA	0.3397	0.2517	NA	0.3442	NA	NA	NA	NA	NA	0.2185	NA	NA	0.3042	NA	0.2701	0.131	0.2065	0.1992	NA	NA	0.1324	NA	0.1988	NA
MIMAT0003945	NA	NA	0.8116	0.3516	NA	NA	NA	1.24453	NA	0.2696	NA	0.4037	NA	1.00374	NA	0.795711	0.3711	NA	0.2505	NA	0.54351	0.543004	NA	0.722349	0.342518	0.3397	0.2517	1.06052	0.1823	NA	0.47452	NA	NA	NA	NA	NA	0.794806	0.4352	0.3057	0.2701	0.651107	NA	0.530163	0.1808	NA	0.253664	0.3813	0.373494	0.708964
MIMAT0031181	NA	NA	NA	NA	0.3674	NA	NA	NA	NA	NA	NA	NA	NA	NA	NA	NA	NA	NA	NA	NA	NA	NA	NA	NA	NA	NA	NA	NA	NA	NA	NA	NA	NA	NA	NA	NA	NA	NA	NA	NA	0.362	NA	NA	0.1808	NA	NA	NA	NA	NA
MIMAT0031180	NA	NA	NA	NA	NA	NA	NA	NA	NA	NA	NA	NA	NA	NA	NA	NA	NA	NA	NA	NA	NA	0.2969	NA	NA	NA	NA	NA	NA	NA	NA	NA	NA	NA	NA	0.2185	NA	NA	NA	NA	NA	NA	0.2065	NA	NA	NA	NA	0.2032	NA	NA
MIMAT0015378	6.08783	9.24295	6.28597	7.03308	4.03302	8.67111	5.1716	1.9025	5.55494	7.4883	5.04165	8.86193	7.99318	5.00736	7.09691	4.48193	4.23997	5.82103	7.37311	5.58757	5.78717	6.44127	5.46922	8.43141	5.3737	4.82501	7.60317	3.84698	6.43765	6.39556	7.70888	7.11029	7.06469	5.71489	4.71023	4.54262	5.87195	6.83741	6.57933	4.74092	6.54089	5.50197	7.97498	4.06656	5.07176	8.61497	6.81344	4.38879	5.52552
MIMAT0015377	0.6337	0.291682	NA	NA	NA	NA	0.2515	NA	NA	NA	NA	NA	NA	NA	NA	NA	NA	NA	NA	NA	NA	NA	NA	NA	NA	NA	0.2517	0.4456	NA	NA	0.1761	NA	NA	0.4006	NA	0.648065	0.794806	NA	NA	NA	NA	0.2065	NA	0.3415	NA	NA	0.2032	NA	NA
MIMAT0003386	1.25031	0.741585	NA	0.634082	0.3674	0.2677	0.652	NA	NA	NA	NA	NA	0.67566	1.0038	NA	0.1981	0.910745	0.743723	0.4639	0.63603	0.7539	NA	0.700015	0.572783	1.14128	NA	0.4659	0.78556	0.1823	NA	0.721666	0.2888	NA	0.400494	0.575758	0.812331	0.794837	0.86509	0.772256	1.79531	NA	1.15773	0.530255	1.13864	0.3718	0.469326	0.2032	1.02454	NA
MIMAT0003385	NA	NA	NA	NA	1.59935	NA	NA	NA	NA	0.692834	NA	NA	0.1628	NA	NA	NA	NA	NA	NA	NA	0.2972	0.2969	0.2728	0.2172	NA	0.3397	NA	NA	NA	NA	NA	NA	NA	NA	NA	NA	NA	NA	NA	0.2701	NA	NA	NA	NA	NA	NA	NA	0.1988	NA
MIMAT0022978	NA	NA	NA	NA	NA	NA	NA	NA	NA	NA	NA	NA	NA	NA	NA	0.372254	0.3711	0.2926	0.2505	NA	NA	NA	0.2728	NA	NA	NA	NA	NA	NA	NA	NA	NA	NA	NA	NA	NA	NA	NA	NA	NA	NA	NA	NA	NA	NA	NA	NA	NA	NA
MIMAT0022979	NA	NA	NA	NA	NA	NA	NA	NA	NA	NA	NA	NA	0.3091	NA	NA	0.1981	NA	NA	NA	NA	NA	NA	NA	NA	NA	NA	NA	NA	NA	NA	NA	NA	NA	NA	NA	NA	NA	NA	NA	NA	0.131	NA	NA	NA	NA	NA	NA	NA	NA
MIMAT0022975	1.40861	2.54004	2.00743	1.55171	4.10774	3.34715	1.33545	NA	1.2923	3.03413	0.968115	3.50222	3.31633	1.91246	1.8819	2.72117	1.46479	2.45854	1.71173	1.76576	0.7539	2.74668	2.48016	2.1413	0.342518	2.4629	1.875	0.78556	3.69929	0.712841	1.84653	0.7354	2.37649	1.54603	4.06131	1.4336	1.68009	2.01832	2.57424	2.03164	3.08909	1.97217	1.75207	1.1386	2.03097	1.9925	2.16305	2.44177	1.68769
MIMAT0022977	NA	NA	NA	NA	NA	NA	NA	NA	NA	NA	NA	NA	NA	NA	NA	NA	NA	NA	NA	NA	NA	0.2969	NA	NA	NA	NA	NA	NA	NA	NA	NA	NA	NA	NA	NA	NA	NA	NA	NA	NA	NA	NA	NA	NA	NA	NA	NA	NA	NA
MIMAT0003389	6.55794	8.24504	7.68937	6.10023	8.21335	9.11278	7.26072	3.30749	8.47003	8.70988	6.09418	6.1111	8.42596	7.84991	7.36009	5.96323	7.11162	7.62902	7.58883	8.12843	7.66867	7.34449	6.56176	7.63799	8.64865	8.52734	9.12132	10.1782	9.98328	6.6676	9.54903	6.57598	7.78549	9.35845	7.26545	8.45338	8.17033	6.23652	8.71376	8.41436	7.86147	8.02817	8.32856	8.40717	8.12618	7.96367	8.11781	9.20062	7.62754
MIMAT0018979	NA	0.1532	NA	NA	NA	NA	NA	NA	NA	0.865437	0.2525	NA	NA	NA	NA	NA	NA	NA	NA	NA	NA	NA	NA	NA	NA	NA	NA	NA	0.1823	NA	NA	NA	NA	NA	0.4081	NA	NA	NA	NA	NA	NA	NA	NA	NA	NA	0.1324	0.2032	NA	0.709
MIMAT0003164	NA	NA	NA	NA	NA	NA	NA	NA	NA	NA	NA	NA	NA	NA	NA	NA	NA	NA	NA	0.2445	NA	NA	NA	NA	NA	NA	NA	NA	NA	NA	NA	NA	NA	NA	NA	NA	NA	NA	NA	NA	NA	NA	NA	NA	NA	NA	NA	NA	NA
MIMAT0003165	NA	NA	NA	NA	NA	NA	0.2515	NA	NA	NA	NA	NA	NA	0.587415	NA	NA	0.3711	NA	NA	NA	0.5436	NA	NA	0.2172	0.1814	0.614462	0.465942	NA	NA	NA	NA	NA	0.976396	NA	NA	NA	NA	0.304195	0.3057	NA	0.131	0.547595	0.1992	0.3415	NA	NA	NA	NA	NA
MIMAT0003163	3.16959	2.81721	1.0927	1.80052	1.852	0.6886	1.79732	3.2041	1.2923	0.2696	1.63393	0.977166	0.876894	1.46425	NA	NA	2.07964	1.88673	2.4226	2.62534	0.9374	1.61177	2.42531	1.39207	1.77047	1.97104	1.22289	3.32866	1.77605	0.146	1.35492	0.2888	1.19539	1.69609	1.56648	1.8665	1.30439	2.13855	2.18262	3.17482	1.48857	1.50921	1.47321	2.46981	0.66723	3.54448	0.539793	3.09361	0.964942
MIMAT0003161	3.03042	3.37956	0.811703	2.9816	2.25405	1.69737	2.5263	2.35277	0.786192	1.1589	0.654242	1.55442	1.21054	2.32802	1.3848	NA	3.05905	2.39832	3.77658	3.00303	2.35559	1.09922	1.80656	1.84763	2.60672	2.23782	1.33604	1.96167	2.21327	0.889189	2.36571	0.735411	2.18512	1.83198	1.85433	2.19901	2.56049	1.97591	2.18264	2.17009	1.75551	2.32212	0.799193	3.29456	1.46672	2.6521	1.23957	2.96298	2.26547
MIMAT0031074	NA	NA	NA	NA	0.3674	NA	NA	NA	NA	0.2696	NA	NA	NA	NA	NA	NA	NA	NA	NA	0.453506	NA	NA	NA	NA	NA	NA	0.2517	0.4456	NA	0.146	0.1761	NA	NA	0.2141	0.2185	0.2498	NA	NA	NA	NA	0.131	NA	NA	NA	NA	NA	NA	NA	NA
MIMAT0018935	NA	NA	NA	NA	NA	NA	NA	NA	NA	NA	NA	NA	NA	NA	NA	NA	NA	NA	NA	NA	NA	NA	NA	NA	NA	0.3397	0.2517	NA	NA	NA	NA	NA	NA	NA	NA	NA	NA	NA	NA	NA	NA	NA	NA	NA	NA	NA	NA	NA	NA
MIMAT0018934	NA	NA	NA	NA	0.3674	NA	NA	NA	NA	NA	NA	NA	NA	NA	NA	NA	NA	NA	NA	NA	NA	NA	NA	NA	NA	NA	NA	NA	NA	0.146	NA	NA	NA	NA	NA	NA	NA	NA	NA	NA	0.131	0.2065	NA	NA	NA	NA	NA	NA	NA
MIMAT0018937	NA	NA	NA	NA	NA	NA	NA	NA	NA	NA	NA	NA	NA	NA	NA	NA	NA	NA	NA	NA	NA	NA	NA	NA	NA	NA	NA	NA	NA	NA	NA	NA	NA	NA	NA	NA	NA	NA	NA	NA	0.131	NA	NA	NA	NA	NA	NA	NA	NA
MIMAT0018936	NA	NA	NA	NA	1.7312	NA	NA	NA	NA	NA	NA	NA	1.05329	NA	NA	NA	NA	0.2926	NA	0.453506	0.2972	NA	NA	NA	NA	0.614462	0.2517	NA	NA	NA	NA	0.2888	NA	NA	0.2185	1.70853	NA	NA	NA	NA	NA	1.05463	NA	NA	NA	NA	0.2032	NA	NA
MIMAT0018933	NA	NA	NA	NA	NA	NA	NA	NA	NA	NA	NA	NA	NA	NA	NA	NA	NA	NA	NA	NA	NA	NA	NA	NA	NA	NA	0.2517	NA	NA	NA	NA	NA	NA	NA	NA	NA	NA	NA	NA	NA	NA	NA	NA	NA	NA	NA	NA	NA	NA
MIMAT0016884	NA	NA	NA	NA	NA	NA	NA	NA	NA	NA	NA	NA	0.1628	NA	NA	NA	NA	NA	0.2505	NA	NA	NA	NA	NA	NA	NA	NA	NA	0.1823	NA	NA	NA	NA	NA	0.2185	NA	0.3161	NA	NA	NA	NA	NA	NA	NA	NA	0.1324	NA	NA	NA
MIMAT0016889	NA	NA	NA	NA	NA	NA	NA	NA	NA	NA	NA	NA	NA	NA	NA	NA	NA	NA	NA	NA	NA	NA	NA	NA	NA	NA	NA	NA	NA	NA	NA	NA	NA	NA	NA	NA	NA	NA	NA	NA	NA	NA	NA	NA	NA	NA	NA	NA	NA
MIMAT0016888	3.33646	1.64526	3.82948	NA	4.31108	2.28526	2.20742	3.49439	NA	1.15893	4.10901	3.01846	2.19675	0.3234	2.40522	2.51371	3.76716	3.71602	3.94593	4.32331	2.88868	NA	3.48547	2.14123	3.13271	0.614462	2.57413	3.16371	4.66583	0.2786	1.84646	0.7354	3.0171	2.01439	3.98887	1.32897	1.97799	2.13849	3.62373	3.10752	1.67188	0.2065	NA	3.85656	1.21599	3.11915	1.32914	NA	2.44437
MIMAT0018939	NA	NA	NA	NA	NA	NA	NA	NA	NA	NA	NA	NA	NA	NA	NA	NA	NA	NA	NA	NA	NA	NA	NA	NA	NA	NA	NA	NA	NA	NA	NA	NA	NA	NA	NA	NA	NA	NA	NA	NA	NA	NA	NA	NA	NA	NA	NA	NA	NA
MIMAT0018938	NA	NA	NA	NA	NA	NA	NA	NA	NA	NA	NA	NA	NA	NA	NA	NA	NA	NA	NA	NA	NA	NA	NA	NA	NA	NA	NA	NA	NA	NA	NA	NA	NA	NA	NA	NA	NA	NA	NA	NA	NA	NA	NA	NA	NA	NA	NA	NA	NA
MIMAT0028125	NA	NA	NA	NA	NA	NA	NA	NA	NA	NA	NA	NA	NA	NA	NA	NA	NA	NA	NA	0.2445	0.2972	NA	NA	NA	0.1814	NA	0.2517	NA	0.1823	NA	NA	NA	NA	0.2141	NA	NA	NA	NA	NA	NA	0.131	0.2065	NA	0.1808	NA	NA	NA	NA	NA
MIMAT0028124	NA	NA	NA	NA	NA	NA	NA	NA	NA	NA	NA	NA	NA	NA	NA	NA	NA	NA	NA	NA	NA	NA	NA	NA	NA	NA	NA	NA	NA	NA	NA	NA	NA	NA	NA	NA	NA	NA	0.3057	NA	NA	NA	NA	NA	NA	NA	NA	0.1988	NA
MIMAT0028126	NA	NA	NA	NA	NA	NA	NA	1.61073	NA	NA	NA	NA	NA	NA	NA	NA	NA	NA	NA	NA	NA	NA	NA	NA	NA	NA	NA	NA	NA	NA	NA	NA	NA	NA	NA	NA	NA	NA	NA	NA	0.131	NA	NA	NA	NA	NA	NA	NA	NA
MIMAT0028121	NA	NA	NA	NA	NA	NA	0.2515	NA	NA	NA	NA	NA	NA	NA	NA	NA	NA	NA	NA	NA	NA	NA	NA	NA	NA	NA	NA	NA	NA	NA	NA	NA	NA	NA	NA	NA	NA	NA	NA	NA	NA	NA	NA	NA	NA	NA	NA	NA	NA
MIMAT0028120	NA	NA	NA	0.3516	NA	NA	NA	NA	NA	0.2696	0.2525	NA	0.1628	NA	NA	NA	NA	NA	NA	NA	NA	NA	0.2728	NA	NA	NA	0.465942	NA	NA	NA	NA	NA	NA	NA	NA	NA	NA	NA	NA	NA	0.131	NA	NA	NA	NA	NA	NA	0.1988	NA
MIMAT0028123	NA	0.1532	NA	NA	NA	0.493416	NA	NA	NA	NA	NA	NA	0.3091	NA	NA	NA	0.3711	NA	NA	0.2445	NA	0.543004	NA	NA	0.1814	NA	NA	NA	NA	NA	NA	NA	NA	0.400494	0.2185	0.2498	NA	0.3042	0.5577	NA	NA	NA	NA	NA	NA	NA	NA	0.1988	NA
MIMAT0028122	NA	0.1532	NA	0.3516	NA	0.2677	0.4656	NA	NA	NA	1.54223	NA	0.1628	0.3234	0.6202	0.1981	NA	NA	NA	0.2445	0.5436	0.543004	NA	0.2172	0.1814	NA	NA	0.4456	1.05501	NA	0.1761	NA	NA	0.5656	NA	NA	NA	NA	0.3057	1.61311	2.17546	NA	NA	NA	NA	0.2536	NA	0.669914	NA
MIMAT0019718	NA	NA	NA	NA	NA	NA	NA	NA	NA	NA	NA	NA	0.1628	NA	NA	NA	NA	NA	NA	NA	NA	NA	NA	NA	NA	NA	0.2517	NA	NA	NA	NA	NA	NA	NA	NA	NA	NA	NA	NA	NA	NA	NA	NA	NA	NA	NA	NA	NA	NA
MIMAT0019719	NA	NA	NA	NA	NA	NA	NA	NA	NA	NA	0.46732	NA	NA	NA	NA	NA	NA	0.2926	NA	NA	NA	NA	NA	NA	NA	NA	NA	NA	NA	NA	NA	NA	NA	NA	0.2185	NA	NA	0.1601	0.3057	NA	NA	NA	NA	NA	NA	NA	NA	NA	NA
MIMAT0019712	1.25037	NA	NA	NA	NA	NA	0.817	NA	NA	NA	NA	0.4037	0.1628	NA	0.6202	NA	NA	NA	NA	0.453506	NA	NA	NA	0.4059	0.739751	0.6145	NA	NA	0.489685	NA	0.333024	0.2888	0.7181	0.2141	NA	0.4626	0.985353	0.4351	0.3057	0.694	NA	0.2065	NA	0.341444	NA	0.365462	0.381281	NA	NA
MIMAT0019713	NA	NA	NA	NA	NA	NA	NA	NA	NA	NA	NA	NA	NA	NA	NA	NA	NA	NA	NA	NA	NA	NA	NA	NA	NA	NA	NA	NA	NA	NA	NA	NA	NA	NA	NA	NA	NA	NA	NA	NA	NA	NA	NA	NA	NA	NA	NA	NA	NA
MIMAT0019710	NA	NA	NA	0.634	NA	NA	NA	NA	NA	NA	0.2525	NA	0.309078	NA	NA	NA	NA	0.2926	NA	0.453506	NA	0.5429	NA	0.2172	NA	NA	NA	NA	NA	NA	0.603409	NA	NA	NA	0.2185	NA	NA	NA	NA	NA	1.6719	NA	NA	0.1808	0.3718	NA	NA	0.669919	NA
MIMAT0019711	NA	NA	NA	NA	NA	NA	0.2515	NA	NA	NA	NA	NA	NA	NA	NA	NA	NA	0.2926	NA	NA	NA	NA	0.2728	NA	NA	NA	NA	NA	NA	NA	NA	NA	NA	NA	NA	NA	0.3161	NA	NA	NA	NA	NA	0.1992	NA	NA	NA	NA	NA	NA
MIMAT0019716	NA	NA	2.36555	4.36397	NA	NA	NA	NA	NA	2.95993	4.33088	NA	0.1628	NA	1.88187	NA	2.65095	NA	NA	1.41243	0.753915	2.14632	0.2728	NA	0.739734	NA	0.6524	1.82095	2.84742	NA	0.47452	NA	2.07901	0.2141	4.6829	1.53124	0.794837	NA	NA	0.2701	1.7956	1.05456	NA	0.737799	0.1979	0.365462	2.11351	2.18475	3.90328
MIMAT0019717	NA	NA	NA	NA	NA	NA	NA	NA	NA	NA	0.46732	NA	NA	NA	NA	NA	0.3711	NA	NA	0.2445	NA	NA	NA	NA	NA	NA	NA	NA	0.344127	NA	NA	NA	NA	NA	0.2185	NA	NA	NA	NA	NA	0.361955	NA	NA	NA	NA	NA	NA	NA	NA
MIMAT0001630	NA	NA	NA	NA	NA	NA	NA	NA	NA	NA	NA	NA	NA	NA	NA	NA	NA	0.2926	NA	NA	NA	NA	NA	NA	NA	NA	NA	NA	NA	NA	NA	NA	NA	NA	NA	NA	NA	NA	NA	NA	NA	NA	NA	0.1808	NA	NA	NA	NA	NA
MIMAT0019715	0.3514	0.1532	NA	0.3516	NA	NA	NA	NA	NA	NA	NA	NA	NA	NA	NA	NA	NA	NA	NA	NA	0.2972	NA	NA	NA	NA	NA	NA	NA	NA	NA	NA	NA	NA	NA	NA	0.2498	NA	0.1601	NA	NA	NA	NA	NA	NA	0.527064	NA	0.381281	0.373494	0.3976
MIMAT0026718	1.0725	0.835171	1.09275	NA	1.45418	0.493416	1.09942	1.2445	0.786192	0.2696	1.10262	1.19623	0.675744	1.17408	NA	0.527672	0.666009	0.743723	0.2505	2.28625	0.753915	1.09923	1.71794	0.981567	1.22644	1.37464	1.33606	0.4456	0.958284	NA	NA	0.529319	0.976396	0.2141	1.30534	0.959864	0.794837	1.46484	1.53004	0.2701	0.464907	0.547595	0.670923	1.52066	NA	0.742211	0.381281	0.529306	NA
MIMAT0018069	NA	NA	NA	NA	NA	NA	NA	NA	NA	NA	NA	NA	NA	NA	NA	NA	NA	NA	NA	NA	NA	NA	NA	NA	NA	NA	NA	NA	NA	NA	NA	NA	NA	NA	NA	NA	NA	NA	NA	NA	NA	NA	NA	NA	NA	NA	NA	NA	NA
MIMAT0018068	NA	0.1532	NA	1.25089	1.59937	NA	0.465597	0.7525	0.786192	0.692803	0.968134	1.38647	0.44188	NA	1.05254	0.527631	0.666009	NA	0.649715	0.2445	1.37923	0.936517	0.502128	NA	0.739778	0.614462	0.2517	0.4456	0.344127	NA	0.333024	0.529319	0.4033	0.565539	0.98633	0.2498	NA	0.1601	0.557813	1.51253	1.03253	0.547595	NA	0.48598	0.1979	0.469271	NA	0.373494	0.964912
MIMAT0026719	NA	0.1532	NA	NA	NA	NA	NA	NA	NA	NA	NA	NA	NA	NA	NA	NA	NA	NA	NA	NA	NA	NA	NA	NA	0.1814	NA	0.2517	NA	NA	NA	NA	NA	NA	NA	NA	0.2498	NA	NA	NA	NA	NA	NA	NA	NA	NA	NA	NA	NA	NA
MIMAT0018065	0.633753	NA	NA	NA	NA	NA	NA	NA	NA	NA	NA	NA	NA	NA	NA	NA	NA	NA	NA	0.636	NA	NA	NA	NA	NA	NA	NA	NA	NA	NA	NA	NA	NA	NA	NA	NA	NA	0.1601	NA	NA	NA	NA	NA	NA	0.1979	NA	NA	NA	NA
MIMAT0019065	NA	NA	NA	NA	NA	NA	NA	NA	NA	NA	NA	NA	NA	NA	NA	NA	NA	NA	NA	NA	NA	NA	NA	NA	NA	NA	NA	NA	NA	NA	NA	NA	NA	NA	0.408219	NA	NA	NA	0.557813	NA	0.251089	NA	NA	NA	NA	NA	0.2032	NA	NA
MIMAT0019983	NA	NA	NA	NA	NA	NA	NA	NA	NA	NA	NA	NA	NA	NA	NA	NA	NA	NA	NA	NA	NA	NA	NA	NA	NA	NA	NA	NA	NA	NA	NA	NA	NA	NA	NA	NA	NA	NA	NA	NA	NA	NA	NA	NA	NA	NA	NA	NA	NA
MIMAT0004918	NA	NA	NA	NA	NA	NA	NA	NA	NA	NA	NA	NA	NA	NA	NA	NA	NA	NA	NA	NA	NA	NA	NA	NA	NA	NA	NA	NA	NA	NA	NA	NA	NA	NA	NA	NA	NA	NA	NA	NA	NA	NA	NA	NA	NA	NA	NA	NA	NA
MIMAT0018105	NA	NA	NA	NA	0.6599	NA	NA	NA	0.446	0.2696	0.2525	NA	0.3091	0.3234	NA	NA	0.3711	0.2926	NA	0.453506	NA	NA	0.502128	0.2172	NA	NA	NA	NA	NA	NA	NA	NA	NA	0.2141	0.4081	NA	0.3161	0.1601	0.557813	0.497518	NA	NA	NA	NA	0.1979	NA	NA	0.1988	NA
MIMAT0019067	NA	NA	NA	NA	NA	NA	NA	NA	NA	NA	NA	NA	NA	NA	NA	NA	NA	NA	NA	NA	NA	NA	NA	0.2172	0.1814	NA	NA	NA	NA	0.400007	NA	0.2888	0.4033	NA	NA	NA	NA	NA	NA	NA	NA	NA	NA	NA	NA	NA	NA	NA	NA
MIMAT0009451	2.76374	4.21595	4.367	4.49334	4.86445	4.62383	4.35227	6.83249	3.88436	5.20781	4.55866	5.90111	4.57424	4.27395	4.26772	3.9474	3.10894	3.0347	3.67318	4.74694	3.68888	4.80522	3.84023	4.3685	3.5341	4.79777	3.49714	3.42908	4.43377	2.48033	3.98169	4.21001	3.98512	2.7226	2.56182	3.95932	3.67335	4.66056	3.82935	4.60102	3.72929	3.73441	4.59928	3.25476	4.41177	3.87257	3.92766	4.50603	3.7416
MIMAT0019068	NA	0.2916	NA	NA	NA	0.4935	NA	NA	NA	0.2696	NA	NA	NA	NA	NA	0.1981	NA	0.2926	NA	NA	NA	NA	NA	NA	NA	NA	NA	NA	NA	0.712822	0.1761	0.2888	NA	0.2141	0.2185	NA	NA	NA	NA	NA	NA	NA	0.1992	NA	NA	0.1324	NA	NA	NA
MIMAT0015080	NA	NA	NA	NA	0.3674	NA	0.2515	NA	NA	NA	NA	NA	NA	NA	NA	NA	NA	NA	NA	0.2445	NA	NA	NA	NA	NA	NA	NA	NA	NA	NA	NA	NA	NA	NA	NA	NA	NA	0.304195	0.3057	NA	0.2511	NA	NA	NA	NA	NA	NA	NA	0.709
MIMAT0004917	NA	NA	NA	NA	NA	NA	NA	NA	NA	NA	NA	NA	NA	NA	NA	NA	NA	NA	NA	NA	NA	NA	NA	NA	NA	NA	NA	NA	NA	NA	NA	NA	NA	NA	NA	NA	NA	NA	NA	NA	NA	NA	NA	NA	NA	NA	NA	NA	NA
MIMAT0007399	NA	NA	NA	NA	NA	0.2677	0.465597	NA	NA	NA	NA	NA	0.1628	0.3234	NA	NA	NA	0.2926	0.2505	0.453506	0.2972	NA	NA	NA	0.342518	NA	0.2517	NA	NA	0.146	NA	NA	NA	NA	0.408219	0.2498	NA	NA	NA	0.2701	0.131	0.2065	NA	NA	0.1979	NA	NA	0.1988	NA
MIMAT0019985	NA	NA	NA	NA	NA	NA	NA	NA	NA	NA	0.819716	NA	NA	NA	0.6202	NA	NA	NA	NA	NA	NA	0.2969	NA	0.2172	0.1814	NA	NA	NA	NA	NA	NA	NA	NA	NA	0.725945	0.2498	NA	NA	NA	NA	0.131	NA	NA	NA	NA	NA	NA	NA	0.3976
MIMAT0019984	NA	NA	NA	NA	NA	NA	NA	NA	NA	NA	NA	NA	NA	NA	NA	NA	NA	NA	NA	NA	NA	NA	NA	NA	NA	NA	NA	NA	NA	NA	NA	NA	NA	NA	NA	NA	NA	NA	NA	NA	NA	NA	NA	NA	NA	NA	NA	NA	NA
MIMAT0018117	NA	NA	2.13694	NA	NA	NA	NA	NA	NA	NA	0.4673	NA	NA	NA	NA	NA	NA	NA	NA	NA	1.10027	NA	NA	NA	NA	NA	NA	0.4456	NA	NA	0.1761	NA	NA	NA	NA	NA	NA	NA	NA	NA	NA	NA	NA	NA	NA	NA	NA	NA	NA
MIMAT0018444	NA	NA	NA	NA	NA	NA	NA	NA	NA	NA	NA	NA	NA	NA	NA	NA	NA	NA	NA	NA	NA	NA	NA	NA	NA	NA	NA	NA	NA	NA	NA	NA	NA	NA	NA	0.2498	NA	NA	NA	NA	NA	NA	NA	NA	NA	NA	0.3813	NA	NA
MIMAT0018115	NA	0.534194	NA	2.10809	1.1111	0.2677	1.09941	1.24453	0.786192	0.865467	3.14425	0.977235	NA	0.3234	1.05254	0.372254	0.3711	0.2926	0.649715	0.453506	0.937435	0.753181	0.502128	0.405938	0.1814	1.21876	0.465942	1.49026	1.05491	NA	0.474542	NA	0.976429	0.970837	0.862048	0.2498	0.3161	0.865098	NA	1.87846	0.73584	0.3871	NA	0.73774	0.371899	0.82283	0.539776	0.669914	0.964912
MIMAT0018114	NA	NA	NA	NA	NA	NA	NA	NA	NA	NA	NA	NA	NA	NA	NA	NA	NA	NA	NA	NA	NA	NA	NA	NA	NA	NA	NA	NA	NA	NA	NA	NA	NA	NA	NA	NA	NA	NA	NA	NA	NA	NA	NA	NA	NA	NA	NA	NA	NA
MIMAT0018113	NA	NA	NA	0.3516	NA	NA	NA	NA	NA	NA	NA	NA	NA	NA	NA	NA	NA	NA	NA	NA	0.2972	NA	NA	NA	NA	NA	NA	NA	NA	NA	NA	NA	NA	NA	0.2185	NA	NA	NA	NA	NA	NA	NA	NA	0.1808	NA	NA	NA	NA	NA
MIMAT0018112	NA	0.4179	0.4622	NA	0.3674	NA	0.4656	NA	NA	0.2696	0.2525	NA	0.4419	NA	NA	0.1981	0.6661	NA	NA	0.453506	NA	0.7531	0.700015	NA	0.48742	0.614462	0.965691	0.4456	0.344127	NA	0.1761	NA	0.4033	0.5656	0.408219	0.2498	NA	0.4352	NA	0.2701	0.251089	NA	0.5301	0.48603	NA	0.365462	0.539793	0.529306	0.3976
MIMAT0018443	NA	0.1532	NA	NA	NA	NA	NA	NA	NA	0.496664	NA	NA	NA	NA	NA	NA	NA	NA	NA	NA	NA	NA	NA	0.2172	NA	NA	NA	NA	NA	NA	NA	NA	NA	NA	0.575864	NA	NA	NA	NA	NA	NA	0.3871	NA	NA	NA	0.1324	NA	0.1988	NA
MIMAT0018110	0.6337	0.417953	0.4622	0.3516	0.903098	0.688622	0.465597	0.7525	0.7863	1.01957	2.21216	1.70485	NA	1.58999	1.0526	0.527631	1.46472	0.925476	0.814314	0.798006	0.5436	1.71575	0.7	0.405938	0.1814	0.845206	NA	1.0605	0.742887	0.615917	1.27975	0.529319	1.38549	0.565539	2.6396	1.6226	0.3161	0.955191	0.5577	0.8668	0.560981	0.2065	0.917003	0.737799	0.667172	0.5661	0.931717	1.12574	1.5381
MIMAT0026717	NA	NA	NA	NA	NA	NA	NA	NA	NA	NA	NA	NA	NA	NA	NA	NA	NA	NA	NA	NA	NA	NA	NA	NA	NA	NA	NA	NA	NA	NA	NA	NA	NA	NA	NA	NA	NA	NA	NA	NA	NA	NA	NA	NA	NA	NA	NA	NA	NA
MIMAT0018119	0.633753	NA	NA	0.3516	0.3674	0.493416	1.5383	1.24453	0.446	1.01963	NA	1.55444	2.47003	1.17412	0.6202	2.43736	NA	1.9719	0.814349	1.4125	1.90508	3.24083	1.62373	0.572818	0.954449	0.614462	0.965667	0.78556	3.30618	0.511986	1.55938	0.735394	0.4033	2.01446	0.408219	0.2498	1.78638	0.865027	0.958996	NA	0.56099	1.05462	NA	0.61739	1.0208	0.365462	2.11356	0.669914	0.3976
MIMAT0019888	NA	NA	NA	0.3516	NA	NA	NA	NA	NA	NA	NA	NA	NA	NA	NA	0.1981	NA	NA	0.2505	NA	0.2972	NA	NA	NA	NA	NA	NA	NA	NA	NA	0.1761	NA	NA	NA	0.2185	NA	NA	NA	NA	NA	NA	NA	NA	NA	NA	NA	NA	NA	NA
MIMAT0019889	NA	0.1532	0.4622	NA	NA	NA	0.817041	NA	NA	NA	0.2525	NA	NA	NA	NA	NA	NA	NA	0.2505	NA	NA	NA	NA	0.4059	0.1814	0.6145	0.4659	0.4456	NA	NA	NA	0.2888	NA	NA	NA	NA	NA	0.1601	NA	NA	NA	NA	NA	NA	NA	NA	NA	0.1988	NA
MIMAT0000104	6.7878	6.26139	7.13272	7.07793	6.32501	6.51637	6.36651	4.92792	6.95206	7.36063	6.09421	6.90464	6.76203	7.04371	7.09691	6.78442	5.59192	6.90885	6.51787	6.35216	6.75884	6.34326	6.23485	6.8802	5.8565	6.17827	5.73386	6.47469	6.48397	5.7981	6.38477	6.75237	6.66708	6.23661	6.59205	6.48631	7.24454	6.18391	6.29715	6.8125	6.15284	5.75723	6.62276	5.41928	6.8203	6.27618	6.89814	6.37778	7.74314
MIMAT0019882	NA	NA	NA	NA	NA	NA	NA	NA	NA	NA	NA	NA	NA	NA	NA	NA	NA	NA	NA	NA	NA	NA	NA	NA	NA	NA	NA	0.4456	NA	NA	NA	NA	NA	NA	NA	NA	NA	NA	NA	NA	NA	NA	NA	NA	NA	0.1324	NA	NA	NA
MIMAT0019883	NA	NA	NA	NA	NA	NA	NA	NA	NA	NA	NA	NA	NA	0.3234	NA	NA	NA	NA	NA	NA	NA	NA	0.2728	NA	NA	NA	NA	NA	NA	NA	NA	NA	NA	NA	0.2185	NA	NA	NA	NA	NA	0.131	0.2065	NA	NA	NA	NA	NA	NA	NA
MIMAT0019880	1.55119	1.15834	1.70737	1.80054	2.76553	1.01399	1.33544	3.8771	0.786192	0.692834	3.57301	3.12906	1.05333	2.76131	1.05254	2.31461	1.46477	1.48469	2.31678	0.943547	1.37929	1.37815	1.62372	0.572783	1.45508	2.06552	1.33606	2.08982	2.79232	0.803674	1.55935	1.47135	2.4634	1.18903	2.39251	1.43364	2.36855	1.03994	2.51593	1.95708	2.76522	0.5476	0.3741	1.82252	0.794949	1.72534	0.68257	1.30892	1.82324
MIMAT0019881	NA	NA	NA	NA	0.3674	NA	NA	NA	NA	NA	NA	NA	NA	NA	NA	NA	NA	NA	NA	NA	NA	NA	NA	NA	NA	NA	NA	NA	NA	NA	NA	NA	NA	NA	NA	NA	NA	NA	NA	NA	NA	0.2065	NA	NA	NA	NA	NA	NA	NA
MIMAT0019886	NA	0.1532	NA	NA	NA	NA	NA	NA	NA	NA	0.2525	NA	NA	NA	NA	NA	NA	NA	NA	0.2445	NA	0.2969	NA	NA	NA	0.3397	NA	NA	NA	NA	NA	0.2888	NA	NA	NA	NA	NA	NA	NA	0.693993	NA	NA	NA	NA	NA	NA	NA	NA	NA
MIMAT0019887	NA	0.1532	NA	NA	NA	NA	NA	NA	NA	NA	NA	NA	NA	NA	NA	NA	NA	NA	NA	NA	NA	NA	NA	NA	NA	NA	NA	NA	NA	NA	NA	NA	NA	NA	NA	NA	NA	NA	NA	NA	NA	NA	NA	NA	NA	NA	NA	NA	NA
MIMAT0019884	NA	NA	NA	NA	NA	NA	NA	NA	NA	NA	NA	NA	NA	NA	NA	0.1981	NA	NA	NA	NA	NA	NA	NA	NA	NA	NA	0.2517	0.4456	0.344127	NA	NA	NA	NA	NA	NA	NA	0.3161	NA	NA	NA	0.131	NA	NA	0.1808	NA	NA	NA	NA	NA
MIMAT0019885	NA	0.1532	NA	NA	0.3674	NA	NA	NA	NA	NA	0.2525	NA	NA	NA	NA	NA	NA	NA	NA	0.453506	0.54351	0.5429	NA	NA	0.1814	0.3397	NA	0.78556	NA	NA	0.1761	NA	NA	NA	0.408219	0.462664	NA	0.1601	NA	0.2701	0.131	NA	NA	NA	NA	NA	NA	0.1988	NA
MIMAT0000721	3.7747	3.21533	1.86517	3.45073	3.27798	1.78536	2.70548	1.2445	1.06136	1.01957	0.819679	0.7187	1.41836	2.09327	2.25089	0.9133	3.45609	3.2545	3.96353	2.62536	2.88866	0.7531	2.48017	2.29246	3.23887	2.39174	1.71675	2.68441	2.2948	1.18792	2.36573	2.11236	2.623	1.08409	2.29969	3.21992	1.78635	1.63806	3.35093	3.00021	1.71428	3.11998	1.54811	3.76035	2.031	2.9137	1.14407	3.30245	1.94714
MIMAT0000720	3.37531	2.12437	1.0927	2.9816	3.04441	1.39576	3.07511	0.7525	NA	1.1589	0.968044	1.1962	1.48144	2.39843	1.3848	NA	2.35254	2.45854	2.74169	3.09943	2.47912	0.753091	0.873949	1.47874	2.66889	2.71705	1.3361	2.08985	1.65787	1.31685	2.08592	1.5823	1.1954	1.08403	2.47963	2.8556	1.88538	2.21347	2.39169	3.44416	1.09807	3.26562	0.799214	3.27487	1.80694	2.12562	0.3813	1.75025	0.3976
MIMAT0000723	NA	0.1532	NA	NA	NA	NA	NA	NA	NA	NA	NA	NA	NA	NA	NA	NA	NA	NA	NA	NA	0.2972	2.41708	NA	NA	0.342518	NA	NA	NA	NA	NA	NA	NA	0.4033	NA	NA	NA	NA	NA	NA	NA	NA	0.2065	NA	0.952105	NA	NA	NA	NA	NA
MIMAT0000722	2.57636	3.92825	0.4622	3.99099	2.49572	1.01401	2.78741	4.71879	0.446	0.6928	2.66784	1.38637	0.4419	0.587415	1.0526	0.5277	2.17645	2.0523	2.5212	3.06801	1.71711	1.24538	1.71801	1.2014	1.87953	1.76106	1.44105	1.82096	2.58123	0.511979	2.59999	1.35124	2.07903	0.848045	1.64407	1.93937	2.83263	1.5249	1.84638	3.92677	1.87245	1.34416	1.61931	2.80903	1.86624	3.1816	1.23957	2.90727	1.5381
MIMAT0000725	NA	NA	NA	NA	NA	NA	NA	NA	NA	NA	NA	NA	NA	NA	NA	NA	NA	NA	NA	NA	NA	0.543004	NA	NA	NA	NA	NA	NA	NA	NA	NA	NA	NA	NA	NA	NA	NA	NA	NA	NA	NA	NA	NA	NA	NA	NA	NA	NA	NA
MIMAT0000724	NA	NA	NA	0.3516	NA	0.2677	NA	1.90257	NA	NA	0.968115	NA	0.3091	NA	NA	0.3723	NA	1.36394	0.2505	0.2445	1.37931	5.80888	NA	NA	1.71264	1.76106	0.965661	NA	0.4897	NA	1.20051	NA	0.7181	0.970828	NA	1.62265	3.75409	NA	0.557813	NA	0.131	0.823268	0.670923	2.24449	1.1216	0.1324	0.2032	0.529306	0.3976
MIMAT0000727	4.01515	4.01076	6.01823	4.83765	5.63575	6.22931	4.44347	NA	5.19002	4.08978	4.61604	4.34843	4.79518	5.3383	5.56053	4.89987	5.1184	5.50833	4.97864	4.75683	4.99481	4.9294	5.32681	5.29789	5.19004	4.62221	4.45708	5.03759	5.6983	5.75889	4.50326	7.07758	4.43563	4.48811	5.87553	5.54678	3.99476	4.75766	5.24976	5.14521	4.3228	5.20373	4.77338	4.85993	5.02695	5.14201	4.46097	4.35789	5.101
MIMAT0000726	0.3514	NA	NA	NA	NA	NA	NA	NA	NA	NA	NA	NA	NA	NA	NA	NA	NA	NA	NA	0.2445	NA	1.81273	NA	0.2172	0.7398	NA	NA	NA	NA	NA	NA	NA	NA	0.2141	NA	NA	0.3161	NA	NA	NA	NA	NA	NA	0.3415	0.1979	NA	NA	NA	NA
MIMAT0000729	1.40857	1.00584	NA	2.19765	0.903037	0.2677	1.09942	0.7525	NA	0.2696	1.22576	0.4037	0.675642	0.3234	NA	0.1981	0.910822	0.5357	0.2505	1.07589	0.2972	NA	NA	0.572818	0.487436	0.3397	NA	1.06049	0.742955	0.146	0.603389	NA	0.718139	0.2141	0.575758	0.2498	0.794806	0.304195	NA	1.79535	NA	0.823279	NA	0.737782	0.66723	0.97164	0.2032	0.669914	NA
MIMAT0000728	13.4887	14.1472	15.473	18.2227	11.5737	14.694	12.8086	18.2901	15.2523	14.4033	17.5503	15.0256	15.2056	16.203	14.9247	12.0435	15.157	11.9592	14.9985	14.599	12.7395	14.3028	14.1106	13.7511	13.4884	11.9062	13.8605	8.75611	13.8136	11.2156	14.4653	12.9617	13.8793	14.0779	10.9499	13.0657	13.0524	13.6849	15.0769	8.24451	18.5528	11.6331	15.4695	13.3753	12.4745	15.1429	13.3857	13.4504	16.0265
MIMAT0019082	NA	NA	NA	NA	NA	NA	NA	NA	NA	NA	NA	NA	NA	NA	NA	NA	NA	NA	NA	NA	NA	NA	NA	NA	NA	NA	NA	NA	NA	NA	NA	NA	NA	NA	NA	NA	NA	NA	NA	NA	NA	NA	NA	NA	NA	0.1324	NA	NA	0.3976
MIMAT0019080	NA	NA	NA	NA	NA	NA	NA	NA	NA	NA	NA	NA	NA	NA	NA	NA	NA	NA	NA	NA	NA	NA	NA	NA	NA	NA	NA	NA	NA	NA	NA	NA	NA	NA	NA	NA	NA	NA	NA	NA	NA	NA	NA	NA	NA	NA	NA	NA	NA
MIMAT0019081	NA	NA	NA	NA	NA	NA	NA	NA	NA	NA	NA	NA	NA	NA	NA	NA	NA	NA	NA	NA	NA	NA	NA	NA	NA	NA	NA	NA	NA	NA	NA	NA	NA	NA	NA	NA	NA	NA	NA	NA	NA	NA	NA	NA	NA	NA	NA	NA	NA
MIMAT0002839	NA	NA	NA	NA	NA	NA	NA	1.90257	NA	NA	1.2257	0.4037	NA	NA	NA	NA	NA	NA	NA	NA	NA	NA	0.2728	NA	NA	NA	NA	NA	0.489685	NA	NA	NA	NA	NA	0.2185	NA	NA	NA	NA	NA	NA	0.547595	NA	NA	NA	NA	NA	NA	NA
MIMAT0002838	NA	NA	NA	0.634	NA	NA	0.4656	2.35278	NA	NA	1.54222	0.4037	NA	NA	0.6202	NA	NA	NA	NA	NA	NA	NA	0.2728	NA	NA	0.3397	NA	NA	0.621894	NA	NA	NA	NA	NA	NA	NA	NA	NA	NA	NA	0.2511	1.50922	NA	NA	NA	NA	NA	NA	NA
MIMAT0002837	NA	NA	NA	NA	NA	NA	NA	0.7525	NA	NA	0.46732	NA	NA	NA	NA	NA	NA	NA	NA	NA	NA	NA	NA	NA	NA	NA	NA	NA	NA	NA	NA	NA	NA	NA	NA	NA	NA	NA	NA	NA	NA	0.5476	NA	NA	NA	NA	NA	NA	NA
MIMAT0002836	NA	NA	NA	NA	NA	NA	NA	NA	NA	NA	NA	NA	NA	NA	NA	NA	NA	NA	NA	NA	NA	NA	NA	NA	NA	NA	NA	NA	NA	NA	NA	NA	NA	NA	NA	NA	NA	NA	NA	NA	NA	NA	NA	NA	NA	NA	NA	NA	NA
MIMAT0002835	NA	NA	NA	NA	NA	0.2677	NA	3.30755	NA	NA	3.01367	2.54667	NA	NA	NA	NA	0.3711	NA	NA	0.2445	0.2972	NA	2.63326	NA	0.3425	NA	NA	1.06052	2.37188	NA	NA	NA	NA	NA	NA	NA	NA	NA	0.3057	NA	2.01502	2.2305	NA	NA	NA	0.2536	NA	NA	NA
MIMAT0002834	NA	NA	NA	NA	NA	NA	NA	2.97203	NA	NA	2.48287	0.4037	NA	NA	NA	0.1981	NA	NA	NA	NA	NA	NA	0.8739	NA	NA	NA	NA	0.4456	0.3442	0.616	NA	NA	NA	NA	0.2185	NA	NA	NA	NA	NA	0.561	3.01409	NA	NA	NA	NA	NA	NA	NA
MIMAT0002833	NA	NA	0.4622	0.3516	NA	NA	NA	2.35276	NA	NA	1.44422	0.718783	NA	NA	NA	NA	NA	NA	NA	NA	NA	NA	0.502128	NA	0.1814	NA	NA	NA	0.621847	NA	NA	NA	NA	NA	NA	NA	NA	NA	NA	NA	0.251089	2.23052	NA	NA	NA	NA	NA	NA	NA
MIMAT0002832	NA	NA	NA	NA	NA	NA	0.4656	NA	NA	NA	0.46732	NA	0.1628	NA	NA	NA	NA	NA	NA	NA	NA	NA	0.502128	NA	NA	NA	NA	NA	0.1823	NA	NA	NA	NA	NA	0.2185	NA	NA	NA	NA	NA	NA	0.547595	NA	0.1808	NA	NA	NA	NA	NA
MIMAT0002830	NA	NA	0.4622	NA	NA	NA	0.2515	NA	NA	NA	NA	NA	NA	NA	NA	NA	NA	NA	NA	NA	NA	NA	NA	NA	NA	NA	NA	NA	NA	NA	NA	NA	NA	NA	0.2185	NA	NA	NA	NA	NA	NA	0.692002	NA	NA	NA	NA	NA	NA	NA
MIMAT0027681	NA	NA	NA	NA	NA	NA	NA	NA	NA	NA	NA	NA	NA	NA	NA	NA	NA	NA	NA	NA	NA	NA	NA	NA	NA	NA	NA	NA	NA	NA	NA	NA	NA	NA	NA	NA	NA	NA	NA	NA	NA	NA	NA	NA	NA	NA	NA	NA	NA
MIMAT0027680	NA	NA	NA	NA	NA	NA	NA	NA	NA	NA	NA	0.4037	NA	NA	NA	NA	NA	NA	NA	NA	NA	NA	NA	NA	NA	NA	NA	NA	NA	NA	NA	NA	NA	NA	NA	NA	NA	0.1601	NA	NA	NA	NA	NA	NA	NA	NA	NA	NA	NA
MIMAT0027683	NA	NA	NA	NA	0.3674	NA	0.465597	NA	NA	NA	NA	NA	NA	NA	NA	NA	NA	NA	NA	NA	NA	NA	NA	NA	NA	NA	NA	NA	NA	NA	NA	NA	NA	NA	NA	NA	NA	NA	NA	NA	0.131	NA	NA	NA	NA	NA	NA	NA	NA
MIMAT0027682	NA	0.1532	NA	NA	0.6599	NA	0.965088	NA	NA	0.4967	0.2525	0.4037	0.1628	NA	NA	0.3723	NA	0.2926	NA	0.453506	NA	0.936517	NA	NA	NA	NA	0.2517	NA	NA	NA	NA	0.2888	NA	NA	0.4081	0.4626	NA	NA	NA	NA	0.561019	NA	0.3741	NA	NA	0.469216	0.3813	0.1988	NA
MIMAT0027685	NA	NA	NA	NA	NA	NA	NA	NA	NA	NA	NA	NA	NA	NA	NA	NA	NA	NA	NA	NA	NA	NA	NA	NA	NA	NA	NA	NA	NA	NA	NA	NA	NA	NA	NA	NA	NA	NA	NA	NA	NA	NA	NA	NA	NA	NA	NA	NA	NA
MIMAT0027684	0.3514	1.29641	0.4622	2.01271	0.6599	1.86824	1.22223	3.49441	0.446	1.70496	1.22576	2.28518	2.15864	NA	3.17904	0.527672	1.86408	0.535746	0.2505	1.84208	1.24646	1.37812	0.873893	1.29985	1.52394	0.3397	0.465942	2.08985	1.46008	1.64621	2.40159	1.95641	1.55341	2.32194	1.56653	1.86643	0.985331	1.26798	1.64339	2.75823	0.464888	0.943583	1.98573	0.48598	0.794949	0.742252	1.56866	1.92886	2.16694
MIMAT0027687	NA	NA	NA	NA	NA	NA	NA	NA	NA	NA	0.4673	NA	NA	NA	NA	NA	NA	NA	NA	NA	NA	NA	NA	NA	NA	NA	NA	NA	NA	NA	NA	NA	NA	NA	NA	NA	NA	NA	NA	NA	NA	NA	NA	NA	NA	NA	NA	NA	NA
MIMAT0027686	NA	NA	NA	NA	NA	NA	NA	NA	NA	NA	NA	NA	NA	NA	NA	NA	NA	NA	NA	NA	NA	NA	NA	NA	NA	NA	NA	NA	NA	NA	NA	NA	NA	NA	NA	NA	NA	NA	NA	NA	NA	NA	NA	NA	NA	NA	NA	NA	NA
MIMAT0027689	NA	NA	NA	NA	NA	NA	NA	1.2445	NA	NA	0.2525	0.4037	NA	0.3234	NA	NA	NA	NA	NA	NA	NA	NA	NA	NA	0.3425	NA	NA	1.49024	0.344127	NA	NA	NA	NA	NA	0.2185	NA	0.3161	NA	NA	NA	NA	NA	NA	NA	NA	0.1324	NA	0.1988	NA
MIMAT0027688	NA	0.1532	NA	NA	NA	NA	NA	NA	NA	NA	0.2525	NA	NA	0.3234	NA	NA	NA	NA	NA	NA	NA	NA	NA	0.2172	NA	0.3397	NA	NA	0.1823	NA	NA	NA	NA	NA	0.2185	NA	NA	NA	NA	NA	NA	NA	NA	NA	NA	NA	NA	NA	0.3976
MIMAT0000617	12.7909	13.5047	14.5744	11.9564	13.5733	13.3592	13.1798	15.7607	14.3106	13.0402	14.11	14.5592	13.5659	13.6771	14.7177	12.9323	13.6569	12.5599	13.3391	12.7077	12.1102	14.9335	14.5242	13.0583	12.3412	12.3453	12.9133	6.21839	13.1813	11.7949	12.5336	12.8477	14.0636	14.1565	13.9649	11.4825	12.2235	14.2548	14.2909	13.4364	12.1139	12.8796	14.605	12.0504	11.9349	13.331	12.4474	13.5925	14.7886
MIMAT0027447	NA	NA	NA	NA	0.3674	NA	NA	NA	NA	NA	NA	NA	NA	NA	NA	0.1981	NA	NA	NA	0.2445	NA	NA	0.2728	NA	NA	0.614462	NA	NA	NA	NA	NA	NA	NA	NA	NA	NA	NA	NA	NA	NA	0.131	NA	NA	NA	NA	NA	NA	NA	NA
MIMAT0027446	NA	NA	NA	0.3516	NA	NA	NA	NA	NA	0.2696	NA	0.4037	NA	0.3234	NA	NA	NA	NA	NA	0.2445	NA	0.5429	NA	NA	NA	0.3397	NA	NA	0.1823	NA	0.1761	NA	NA	NA	NA	NA	NA	NA	0.3057	NA	0.251089	NA	NA	NA	NA	NA	NA	0.373494	NA
MIMAT0027445	NA	0.417953	NA	NA	NA	0.2677	NA	NA	0.446	0.2696	0.46732	0.4037	NA	NA	0.6202	0.1981	NA	0.2926	NA	NA	NA	0.2969	0.502128	NA	0.3425	NA	0.2517	NA	NA	NA	NA	NA	NA	0.2141	NA	NA	0.3161	NA	0.3057	NA	0.131	0.2065	0.1992	0.3415	0.1979	0.253664	0.381281	0.1988	0.3976
MIMAT0027444	NA	NA	NA	NA	NA	NA	NA	NA	NA	NA	NA	NA	NA	NA	NA	NA	NA	NA	NA	NA	NA	NA	NA	NA	NA	NA	NA	NA	NA	NA	NA	NA	NA	NA	NA	NA	NA	NA	NA	NA	NA	NA	NA	NA	NA	NA	NA	NA	NA
MIMAT0027443	NA	NA	NA	0.3516	NA	NA	NA	1.2445	NA	NA	NA	NA	NA	NA	NA	NA	NA	NA	NA	NA	NA	NA	NA	NA	NA	NA	NA	NA	NA	NA	NA	NA	NA	NA	NA	NA	NA	NA	NA	NA	NA	NA	NA	NA	NA	NA	NA	NA	NA
MIMAT0027442	NA	NA	NA	NA	NA	NA	NA	NA	NA	NA	0.2525	NA	NA	NA	NA	0.372254	NA	NA	NA	0.2445	NA	NA	NA	NA	NA	NA	NA	NA	NA	NA	NA	NA	NA	NA	NA	NA	NA	NA	NA	0.2701	NA	NA	NA	NA	NA	NA	NA	NA	NA
MIMAT0027441	NA	NA	NA	NA	NA	NA	NA	NA	NA	NA	NA	NA	NA	NA	NA	NA	NA	NA	NA	NA	NA	NA	0.2728	NA	NA	NA	NA	NA	0.1823	0.146	NA	NA	NA	NA	NA	NA	NA	0.1601	NA	NA	NA	NA	0.1992	NA	NA	0.1324	NA	NA	NA
MIMAT0027440	NA	NA	NA	NA	NA	NA	NA	NA	NA	NA	NA	NA	NA	NA	NA	NA	NA	NA	NA	NA	NA	NA	NA	NA	NA	NA	NA	NA	NA	NA	NA	NA	NA	NA	NA	NA	NA	NA	NA	NA	NA	NA	NA	NA	NA	NA	NA	NA	NA
MIMAT0027449	NA	NA	NA	0.3516	NA	0.2677	NA	NA	NA	NA	NA	NA	NA	NA	NA	0.1981	NA	NA	NA	0.2445	NA	0.2969	NA	NA	NA	0.3397	NA	0.4456	0.3442	NA	NA	NA	NA	NA	NA	0.2498	NA	0.3042	NA	NA	NA	NA	0.1992	NA	0.1979	NA	0.2032	NA	0.3976
MIMAT0027448	NA	NA	NA	NA	NA	NA	NA	NA	NA	NA	NA	NA	NA	NA	NA	NA	NA	0.2926	NA	NA	NA	NA	NA	NA	NA	NA	NA	NA	NA	NA	NA	NA	NA	NA	NA	NA	NA	NA	NA	NA	NA	NA	NA	NA	NA	NA	NA	NA	NA
MIMAT0027669	NA	NA	NA	NA	NA	NA	0.4656	0.7525	NA	0.2696	NA	NA	NA	NA	NA	NA	NA	NA	NA	NA	NA	0.7531	NA	NA	NA	NA	NA	NA	NA	NA	NA	NA	NA	NA	NA	0.2498	NA	0.1601	NA	0.2701	NA	NA	0.3741	NA	NA	0.1324	NA	NA	NA
MIMAT0027668	0.3514	NA	NA	NA	0.3674	NA	NA	NA	NA	NA	NA	NA	NA	0.3234	NA	0.1981	NA	NA	NA	NA	0.2972	0.543004	NA	NA	0.1814	NA	NA	NA	NA	NA	NA	0.2888	0.4033	NA	0.2185	NA	NA	0.1601	NA	NA	0.131	NA	NA	NA	NA	NA	NA	NA	NA
MIMAT0027667	0.3514	NA	NA	NA	0.3674	NA	0.2515	NA	0.446	0.2696	NA	NA	NA	NA	0.6202	NA	NA	NA	NA	NA	NA	0.2969	NA	0.2172	0.1814	NA	NA	NA	NA	NA	NA	0.2888	NA	NA	0.4081	NA	NA	0.1601	0.3057	NA	0.2511	NA	NA	NA	NA	0.1324	NA	NA	NA
MIMAT0027666	NA	NA	NA	NA	NA	NA	NA	NA	NA	NA	NA	NA	NA	NA	NA	NA	NA	NA	NA	NA	NA	NA	NA	NA	NA	NA	NA	NA	NA	NA	NA	NA	NA	NA	NA	NA	NA	NA	NA	NA	NA	NA	NA	NA	NA	NA	NA	NA	NA
MIMAT0027665	0.3514	NA	NA	NA	NA	NA	0.2515	NA	0.786192	NA	NA	0.4037	NA	0.3234	NA	0.372254	NA	NA	0.2505	0.2445	NA	0.543004	0.2728	0.2172	0.1814	0.3397	NA	NA	0.1823	NA	NA	NA	NA	NA	NA	NA	NA	0.1601	0.3057	NA	0.131	NA	0.1992	NA	NA	0.1324	NA	0.1988	NA
MIMAT0027664	0.3514	0.2916	NA	NA	NA	NA	NA	NA	0.446	NA	0.2525	NA	NA	NA	0.6202	NA	NA	0.2926	NA	NA	NA	NA	NA	NA	NA	NA	0.2517	NA	0.1823	0.278573	0.1761	NA	NA	NA	NA	0.2498	NA	0.1601	0.3057	NA	NA	NA	0.1992	NA	NA	NA	NA	NA	NA
MIMAT0030021	0.869788	1.00586	1.5301	1.25089	0.659972	1.39573	0.817	3.30754	1.66617	0.496664	1.10268	2.18627	0.967699	1.46423	1.05254	1.21715	NA	0.743723	0.463872	1.30874	0.753915	1.49968	1.80651	1.09568	0.954444	0.845173	1.10001	1.06049	1.52906	0.278573	0.333024	0.735394	1.19537	1.28686	1.64405	0.648065	0.794806	0.769012	0.958996	1.61314	2.78527	0.692018	0.799266	1.13866	0.66723	1.10649	0.812508	1.12572	1.53801
MIMAT0030020	1.40861	1.08415	1.86522	1.07301	1.85203	0.86047	1.5383	NA	0.446	1.40265	0.65426	1.55448	NA	2.00563	0.6202	1.74647	2.58187	0.535746	0.962065	0.797949	1.24648	1.24537	2.4802	1.71122	0.739764	1.04405	1.79816	0.4456	1.83169	0.400007	1.89768	0.915694	0.718139	1.46472	0.72604	1.53123	0.985358	0.865176	1.53003	1.61306	0.464888	1.15774	0.917	1.76696	0.371899	0.971613	0.812494	2.5549	1.18227
MIMAT0027661	NA	0.1532	NA	NA	NA	NA	NA	NA	NA	NA	0.2525	NA	NA	NA	NA	NA	NA	NA	NA	0.4534	0.2972	0.2969	NA	NA	NA	NA	0.2517	NA	NA	NA	NA	NA	NA	NA	NA	NA	NA	0.1601	NA	NA	0.131	NA	NA	0.1808	NA	0.253664	0.2032	NA	0.964942
MIMAT0027660	NA	NA	NA	NA	NA	NA	NA	NA	NA	NA	NA	NA	NA	NA	NA	NA	NA	NA	NA	NA	0.2972	NA	NA	0.2172	NA	NA	NA	NA	NA	NA	NA	NA	NA	NA	NA	NA	NA	NA	NA	NA	NA	NA	NA	NA	NA	NA	NA	NA	NA
MIMAT0022984	NA	NA	NA	NA	NA	NA	NA	NA	NA	NA	NA	NA	NA	NA	NA	NA	NA	NA	NA	NA	NA	NA	NA	NA	NA	NA	NA	NA	NA	NA	NA	NA	NA	NA	NA	NA	NA	NA	NA	NA	NA	NA	NA	NA	0.1979	NA	NA	NA	NA
MIMAT0026640	1.68096	NA	NA	NA	NA	NA	NA	NA	0.446	NA	NA	NA	NA	NA	NA	NA	NA	NA	NA	NA	NA	NA	NA	NA	NA	NA	NA	NA	NA	NA	NA	NA	0.4033	NA	NA	NA	NA	NA	NA	NA	NA	NA	0.530163	NA	NA	0.1324	NA	NA	NA
MIMAT0026641	0.8698	0.1532	NA	NA	NA	0.2677	0.2515	NA	0.446	NA	NA	NA	NA	NA	NA	NA	NA	NA	NA	NA	0.2972	NA	NA	NA	NA	NA	NA	NA	NA	NA	NA	NA	1.1954	NA	9.36809	NA	NA	NA	NA	NA	NA	NA	0.670896	NA	NA	NA	NA	NA	NA
MIMAT0009206	NA	NA	NA	0.8701	NA	0.2677	NA	NA	NA	NA	NA	NA	NA	NA	NA	NA	NA	NA	NA	0.2445	NA	NA	NA	NA	NA	NA	NA	NA	NA	NA	NA	NA	NA	NA	0.2185	NA	NA	NA	NA	NA	0.131	0.547595	NA	NA	NA	NA	NA	NA	NA
MIMAT0009201	NA	NA	NA	NA	0.3674	NA	NA	NA	NA	NA	NA	NA	NA	NA	NA	NA	NA	NA	NA	NA	NA	0.2969	NA	NA	NA	NA	NA	NA	0.489685	NA	0.1761	NA	NA	NA	0.725945	NA	NA	NA	NA	0.693993	NA	NA	NA	NA	NA	NA	NA	NA	NA
MIMAT0009203	0.6337	1.42219	NA	NA	0.3674	NA	NA	NA	NA	0.2696	0.6542	0.4037	0.5636	NA	NA	NA	NA	NA	NA	3.2187	1.81415	NA	NA	0.722349	0.1814	NA	NA	NA	NA	NA	NA	0.2888	NA	NA	0.725893	0.959898	0.3161	0.1601	1.1243	NA	NA	0.943587	NA	0.737799	NA	0.2536	0.381281	0.529301	NA
MIMAT0003885	3.29652	1.53803	3.86729	1.40912	3.75168	3.61063	3.04207	NA	3.04368	3.29797	3.17509	2.95979	2.85063	3.39916	1.65464	4.24487	3.00738	4.17691	3.9459	2.33986	3.85778	3.16929	2.53301	3.66635	3.93888	3.16423	4.02205	2.76347	4.14608	1.43519	2.25237	2.6081	2.83347	2.12439	3.55953	3.38563	1.44077	2.8981	4.33015	4.45968	3.85781	2.32217	3.16885	3.12831	1.68032	3.35419	1.70873	2.75766	3.15922
MIMAT0003884	NA	0.1532	1.70737	NA	1.29277	0.493416	0.651991	NA	NA	0.6928	1.22576	NA	0.3091	0.3234	0.6202	1.30572	NA	1.23202	0.814314	0.635936	1.37926	0.543004	NA	0.857826	1.38282	0.3397	0.965662	1.6651	0.958248	0.2786	0.4745	0.2888	0.4033	0.400494	0.725945	0.812412	0.3161	0.769009	0.959035	1.79535	1.87253	0.547595	0.3741	1.13864	0.66715	0.253664	0.2032	0.373494	0.3976
MIMAT0003887	0.633753	0.835208	1.86519	1.80052	1.59937	0.688548	0.817034	1.2445	1.66621	1.01966	1.33918	1.38647	1.28314	2.65024	1.88187	1.21713	1.61055	0.925531	0.649715	1.41241	1.99068	2.21893	1.41432	1.29983	1.87956	0.6145	1.539	2.20752	1.52914	0.400007	1.79351	0.529319	0.718139	0.7137	1.8543	1.32898	0.794837	1.26801	2.45516	2.10254	2.45099	0.823268	1.12712	1.58632	0.667172	2.12556	1.14407	1.5464	0.964912
MIMAT0003886	3.48598	3.66081	4.07549	4.99568	4.28984	3.58639	3.5441	3.80825	3.84846	3.54652	2.21218	4.72824	3.95028	4.45015	4.9071	3.48	2.95372	4.19473	3.7766	4.38836	4.21849	4.10608	3.25318	3.40389	4.35245	4.34914	3.42217	5.2853	3.88181	4.02077	4.44423	4.15723	3.58082	4.28994	5.16935	4.15574	4.51104	3.58869	3.94436	4.33273	4.8695	3.86207	3.76363	3.77444	3.35906	4.7726	3.31088	3.5225	3.80844
MIMAT0003881	0.3514	0.417953	NA	NA	NA	NA	NA	NA	NA	NA	NA	NA	NA	NA	NA	NA	NA	NA	NA	0.2445	NA	NA	NA	NA	NA	NA	0.2517	NA	NA	NA	0.1761	NA	NA	NA	NA	NA	NA	0.1601	NA	NA	0.2511	NA	NA	0.1808	NA	NA	NA	0.1988	NA
MIMAT0003880	2.87638	1.00577	3.53266	0.870207	3.47893	2.50847	2.61868	0.7525	2.0911	1.70499	2.79258	2.62426	2.47005	3.00662	1.3848	2.6886	2.95375	2.6772	3.10176	2.44147	2.84337	2.69667	3.28433	1.97234	3.06504	2.15424	2.903	2.51207	3.59061	0.712836	0.603389	1.22007	3.17996	2.41147	2.9757	2.51749	1.68015	2.92059	3.75563	2.35566	2.59407	2.2305	1.31045	2.66467	0.9123	2.35971	1.32909	3.62971	2.06121
MIMAT0003883	NA	NA	4.07546	3.58947	NA	NA	NA	NA	NA	NA	NA	NA	NA	NA	NA	NA	NA	NA	NA	0.798033	1.81416	3.20549	NA	NA	NA	1.37462	NA	3.37976	NA	NA	NA	NA	1.1954	NA	NA	1.93933	2.36854	NA	NA	NA	2.08132	2.52858	NA	NA	NA	NA	NA	NA	NA
MIMAT0003882	NA	1.00579	7.24112	7.27841	NA	0.2677	NA	3.09278	0.446	NA	2.2122	NA	NA	NA	NA	NA	0.666009	NA	0.2505	4.01272	7.33021	6.52603	NA	0.572818	1.71267	5.36992	NA	7.17654	0.1823	0.146	NA	NA	5.0127	2.36748	2.09412	4.99152	6.91041	NA	NA	0.497518	7.88955	5.7613	NA	NA	0.1979	0.1324	NA	NA	NA
MIMAT0004606	4.51018	4.55529	3.38406	3.079	3.89919	2.78945	4.11918	0.7525	2.09102	1.61108	1.2257	2.46466	2.37346	2.52982	2.0782	0.372254	3.85748	3.83443	4.41205	4.07729	3.27706	0.753091	3.05064	2.8749	4.31409	3.12088	2.52714	1.06052	3.00095	2.48031	2.82812	2.44152	2.28394	1.89532	2.56186	3.92385	3.90329	1.88718	3.47862	2.88431	2.59413	3.76746	2.18667	4.48303	2.54859	3.03704	1.89631	3.54087	1.53807
MIMAT0004607	NA	0.2916	NA	1.4091	0.3674	1.15275	0.2515	0.7525	NA	0.496664	0.2525	0.977166	0.309078	NA	NA	0.91321	NA	1.08691	NA	0.943643	0.5436	1.7158	NA	NA	0.1814	2.06553	1.22281	4.73843	0.621847	0.146	NA	NA	0.4033	0.970979	0.575758	0.2498	0.3161	0.4351	NA	0.2701	0.735859	1.42901	NA	1.452	NA	NA	0.2032	NA	NA
MIMAT0004604	7.93383	8.78841	5.6572	6.91925	7.84977	4.40516	8.33556	4.75584	4.81622	4.69278	4.69275	5.40344	5.74021	5.35613	4.68417	2.03267	7.55588	6.52795	7.62672	8.74367	6.41264	6.45264	6.50995	5.75813	7.6532	8.48304	5.35159	7.00832	6.48613	4.04885	6.98924	4.19259	7.35071	6.27881	7.10682	6.98751	6.68169	7.05927	6.80011	8.141	5.94373	7.31174	6.71103	7.38455	5.68834	7.66754	5.2443	8.06376	5.17892
MIMAT0004605	3.74529	NA	1.09283	1.25078	NA	0.2677	0.465597	0.7525	2.09104	NA	0.4673	NA	0.1628	0.3234	1.88191	0.372254	NA	0.2926	NA	0.2445	NA	NA	NA	0.2172	0.342518	0.3397	0.2517	1.06049	0.344127	NA	0.1761	NA	1.70382	NA	NA	0.2498	NA	NA	0.3057	NA	0.651065	0.2065	0.916952	0.1808	NA	NA	NA	NA	NA
MIMAT0004602	1.07254	1.59259	2.46757	2.7644	3.68817	3.06026	2.9384	4.00559	1.49137	3.57171	0.968134	3.23177	2.50075	2.09326	3.09081	0.795769	1.6105	2.45859	1.43644	3.57222	2.59291	2.88694	1.96875	1.47872	2.36553	2.53076	1.94807	3.47671	2.84741	1.83041	2.7185	2.38142	2.07903	2.17644	3.7815	3.09784	2.49928	2.82827	2.39169	3.64746	1.62819	2.67482	3.14489	3.15019	2.17878	2.09342	2.50813	2.36104	3.35091
MIMAT0004603	3.21315	3.51296	2.81593	3.21385	4.63111	4.33406	3.6789	4.56035	4.55223	3.3857	5.28751	4.99971	4.00497	1.9124	4.5582	1.12275	2.07968	3.50366	3.73612	3.38095	2.74831	4.08685	2.30894	3.11025	2.94466	2.71709	2.32261	2.60084	4.5125	3.85011	4.57573	3.56785	3.69298	1.89541	6.20776	3.73197	3.78008	1.7926	2.51589	4.601	3.51812	2.67484	3.82516	2.63396	4.07681	4.46257	3.72805	6.16552	0.964912
MIMAT0004600	3.93938	3.81799	7.27667	7.82474	3.81253	8.17054	4.4561	3.73591	4.95744	4.56087	7.69462	6.40297	7.23566	5.7623	6.76772	6.69909	4.66388	6.32853	6.79417	5.15845	9.83685	5.65387	5.38542	9.77819	5.52828	5.76459	6.30277	6.20436	7.48132	8.88951	6.14121	10.321	7.18151	6.73187	4.84765	7.36207	6.42621	6.81206	4.45957	3.69414	4.28107	6.22317	6.00794	5.76224	7.81195	6.45587	7.48272	5.43004	4.07611
MIMAT0004601	4.94421	3.58206	5.82996	4.99568	4.79078	6.45058	5.28162	4.56032	5.56601	4.93491	3.70582	5.62727	5.94719	4.65112	5.51039	1.9797	5.05618	6.79074	4.87986	6.26825	4.72218	3.76186	3.63798	4.78879	5.56146	5.21361	4.39308	4.28212	5.03533	5.87867	4.75291	5.45916	4.57884	4.08757	5.6214	6.0937	4.85425	5.28621	5.40246	4.57632	4.16355	5.91639	5.61787	5.45924	5.02045	4.83708	5.2728	3.50383	3.77543
MIMAT0019231	NA	NA	NA	NA	NA	NA	NA	NA	NA	NA	NA	NA	NA	NA	NA	NA	NA	NA	NA	NA	NA	NA	NA	NA	NA	NA	NA	NA	NA	NA	NA	NA	NA	NA	NA	NA	NA	NA	NA	0.866825	NA	NA	NA	0.1808	0.1979	NA	NA	NA	NA
MIMAT0019230	NA	NA	NA	NA	NA	NA	NA	NA	0.446	NA	NA	NA	0.1628	NA	NA	NA	NA	NA	NA	NA	NA	NA	NA	NA	NA	NA	NA	NA	NA	NA	NA	0.2888	NA	0.2141	0.5757	NA	NA	NA	NA	NA	NA	NA	NA	NA	NA	NA	NA	NA	NA
MIMAT0019233	0.3514	0.1532	NA	NA	NA	NA	0.2515	NA	NA	NA	NA	NA	NA	0.3234	NA	NA	NA	NA	NA	NA	0.2972	NA	NA	NA	NA	NA	NA	NA	NA	NA	NA	NA	NA	NA	NA	NA	NA	NA	NA	0.4976	0.131	NA	NA	NA	NA	0.2536	NA	NA	NA
MIMAT0019232	0.3514	0.1532	0.4622	0.870137	2.25397	0.2677	NA	NA	0.446	1.01961	0.4673	1.84111	2.56047	NA	NA	NA	0.3711	0.2926	NA	0.797949	0.2972	NA	NA	0.2172	NA	0.845206	0.817533	NA	0.1823	0.615917	0.47452	0.2888	0.718139	0.2141	0.2185	2.60974	NA	0.3042	0.959035	1.16058	NA	1.34411	NA	0.737782	NA	0.1324	0.539793	0.373494	NA
MIMAT0019235	NA	NA	NA	0.3516	NA	NA	NA	NA	NA	NA	NA	NA	NA	NA	NA	NA	NA	NA	NA	NA	NA	NA	NA	NA	NA	NA	NA	NA	NA	NA	NA	NA	NA	NA	NA	NA	NA	NA	NA	NA	NA	NA	NA	NA	NA	NA	NA	NA	NA
MIMAT0019234	NA	NA	NA	NA	NA	NA	NA	NA	NA	NA	NA	NA	NA	NA	NA	NA	NA	NA	NA	NA	NA	NA	NA	NA	NA	NA	NA	NA	NA	NA	NA	NA	NA	NA	NA	NA	NA	NA	NA	NA	NA	NA	NA	NA	NA	NA	NA	NA	NA
MIMAT0019236	NA	NA	NA	NA	NA	NA	NA	NA	NA	NA	NA	NA	NA	NA	NA	NA	NA	NA	NA	NA	NA	NA	NA	NA	NA	NA	NA	NA	NA	NA	NA	NA	NA	NA	NA	NA	NA	NA	NA	NA	NA	NA	NA	NA	NA	0.1324	NA	NA	NA
MIMAT0002851	NA	NA	NA	NA	NA	NA	NA	1.61076	NA	NA	1.10274	NA	NA	NA	NA	NA	NA	NA	NA	NA	NA	NA	NA	NA	NA	NA	NA	NA	NA	0.399983	NA	NA	NA	NA	NA	NA	NA	NA	NA	NA	NA	0.943593	NA	NA	NA	NA	NA	NA	NA
MIMAT0004284	0.3514	0.1532	NA	NA	NA	NA	NA	NA	NA	NA	NA	NA	NA	0.3234	NA	NA	0.666009	NA	NA	NA	NA	NA	NA	NA	NA	NA	NA	NA	NA	NA	NA	NA	NA	NA	0.2185	NA	NA	NA	NA	3.54937	0.131	0.2065	NA	NA	NA	0.1324	NA	NA	0.3976
MIMAT0002850	NA	NA	NA	NA	NA	NA	NA	NA	NA	NA	NA	NA	NA	NA	NA	NA	NA	NA	NA	NA	NA	NA	0.2728	NA	NA	NA	NA	NA	NA	NA	NA	NA	NA	NA	NA	NA	NA	NA	NA	NA	NA	0.2065	NA	NA	NA	NA	NA	NA	NA
MIMAT0004518	3.48598	2.12433	3.66739	2.57694	4.54413	3.02454	3.96939	1.9025	2.20879	2.84079	3.92145	2.18635	2.9874	3.49876	1.38475	3.31903	2.35253	3.90105	3.36338	2.7885	4.02932	4.35186	2.24703	4.17449	3.692	3.63412	2.61959	3.52287	3.77222	1.18779	3.00178	3.09333	4.0142	1.95606	4.06129	4.28723	1.44076	3.99125	3.35094	3.64744	2.57122	3.49947	3.30472	3.06069	2.54863	3.70191	3.64328	2.137	4.66876
MIMAT0004512	0.3514	1.36071	NA	0.634	0.6599	0.2677	0.651991	NA	0.786192	0.4967	NA	NA	0.675735	NA	0.6202	NA	NA	NA	0.4639	NA	NA	0.7531	NA	0.2172	1.22641	0.614462	0.2517	3.98525	0.1823	0.2786	0.47452	0.9156	0.7181	NA	0.4081	NA	0.3161	0.4351	NA	NA	0.131	2.70916	1.47313	0.952077	NA	0.5661	0.2032	0.1988	0.3976
MIMAT0004513	2.64158	2.79413	3.43533	2.64221	3.09422	4.40519	3.19992	NA	1.82215	4.14105	2.15135	3.18133	3.72112	3.29218	2.4052	2.31461	2.26717	2.86699	3.30921	3.65915	3.34354	3.09412	1.71803	3.21488	3.51736	3.43601	2.08403	3.32868	2.87417	2.30484	0.932589	3.39632	2.3765	2.32196	3.47718	3.21988	1.68019	3.31012	2.6303	3.17487	1.94554	3.09423	1.6872	2.57056	2.54862	2.89511	2.84824	1.75029	0.708964
MIMAT0004510	NA	0.1532	0.4622	NA	NA	NA	NA	NA	NA	NA	NA	NA	NA	NA	NA	NA	0.3711	0.2926	NA	0.2445	0.2972	0.2969	NA	NA	NA	0.6145	NA	0.4456	NA	NA	NA	NA	0.4033	0.400494	0.575758	0.4626	NA	0.1601	0.3057	1.40451	0.464888	NA	0.6709	0.341444	NA	0.253664	0.381281	0.669919	0.3976
MIMAT0004511	0.3514	1.29635	2.0075	1.07297	2.25398	1.94665	1.71603	NA	1.96283	0.692834	0.9681	1.70489	2.11953	1.0038	1.6546	NA	1.46484	NA	1.43651	2.11234	1.50086	1.9892	0.2728	1.63773	1.71268	0.8452	0.817539	0.4456	2.37191	1.11878	1.79347	1.07595	1.70384	NA	2.74888	2.13835	0.575236	0.769088	0.3057	2.29646	0.815975	1.05464	1.12706	1.30376	1.12165	2.41274	1.32916	3.30243	NA
MIMAT0004516	NA	NA	1.09283	1.40908	NA	NA	NA	NA	NA	NA	NA	NA	NA	NA	NA	NA	NA	NA	NA	NA	1.24653	NA	NA	NA	NA	NA	NA	NA	NA	NA	NA	NA	NA	NA	NA	0.462664	1.15365	NA	NA	NA	0.651062	0.2065	NA	NA	NA	NA	NA	NA	NA
MIMAT0004517	NA	NA	NA	NA	0.659972	NA	0.465597	NA	NA	0.496664	NA	0.4037	0.1628	NA	NA	NA	NA	NA	NA	NA	0.2972	NA	0.2728	0.2172	NA	0.3397	NA	NA	0.1823	NA	NA	0.2888	0.7181	NA	NA	NA	NA	NA	0.3057	1.28767	0.251089	0.2065	NA	NA	0.1979	0.365521	NA	0.1988	NA
MIMAT0004514	2.2813	1.15831	3.57899	0.3516	3.36176	1.69735	3.80223	2.84036	2.60222	2.29397	4.52309	3.5428	2.3735	3.91392	0.6202	3.08877	3.56737	2.39828	3.13333	2.23048	2.69842	4.19871	2.04349	3.26454	2.7284	3.07615	4.03883	4.1114	2.03502	0.146	1.11656	0.915694	3.45916	3.24499	1.30528	2.96444	0.985358	3.79788	2.83504	3.82568	1.62823	2.52856	3.04494	3.61066	0.371899	3.68046	2.46924	2.72576	1.53807
MIMAT0004515	3.41316	5.69306	5.81068	3.94005	4.59696	6.64828	5.3506	4.82712	5.47493	4.17429	5.03329	6.56421	6.38686	5.10538	5.68622	5.28469	5.21275	4.37748	4.62659	6.13434	5.00515	5.89449	5.07391	5.17352	4.87134	5.19278	5.28969	3.10427	5.20828	3.68067	3.8054	4.10246	5.64446	4.04623	4.6551	4.70826	2.67558	6.15329	4.13083	3.69413	3.91347	4.10075	6.64212	4.31904	3.72248	5.37704	4.20114	5.06646	3.63508
MIMAT0003393	7.68398	5.13126	8.38061	7.2988	8.19778	7.90684	6.87249	7.98277	6.56179	6.55583	8.6804	8.20674	8.15065	8.58687	7.03327	7.30853	7.52864	6.90884	7.74619	8.43047	8.9071	7.24151	7.42021	7.46174	8.42958	7.59997	7.45278	7.64146	7.59529	4.92085	6.91978	6.52481	7.84539	7.40236	8.52236	7.53229	6.49055	7.76962	8.53351	7.97853	7.13101	7.73291	6.07284	7.10844	6.70912	7.49068	6.78993	6.71465	6.36731
MIMAT0005908	NA	NA	NA	NA	NA	NA	NA	NA	NA	NA	NA	NA	NA	NA	NA	NA	NA	NA	NA	NA	NA	NA	NA	NA	NA	NA	NA	NA	NA	NA	NA	NA	NA	NA	0.2185	NA	0.3161	NA	NA	NA	NA	NA	NA	NA	NA	NA	NA	NA	NA
MIMAT0022967	NA	0.1532	NA	NA	0.3674	NA	0.4656	NA	NA	NA	0.2525	NA	NA	NA	NA	NA	0.3711	0.2926	0.2505	NA	0.2972	NA	NA	NA	NA	NA	NA	NA	0.1823	NA	NA	NA	NA	0.2141	NA	0.4626	NA	0.555289	NA	0.2701	0.131	NA	0.1992	NA	NA	0.365462	NA	NA	NA
MIMAT0022966	NA	1.15837	NA	NA	1.45415	0.688622	0.651989	NA	0.446	0.2696	0.2525	NA	0.4419	2.25393	1.38475	1.12277	1.3027	NA	0.2505	1.30878	0.2972	0.753091	NA	NA	1.65244	1.76105	1.53899	0.78556	1.38772	NA	NA	NA	NA	0.970908	NA	1.78966	NA	0.555289	0.958911	0.2701	NA	1.79157	NA	0.61739	0.1979	0.742182	0.2032	0.373494	NA
MIMAT0022741	NA	NA	NA	NA	NA	NA	NA	NA	NA	NA	NA	NA	NA	NA	NA	NA	NA	NA	NA	NA	NA	NA	NA	NA	NA	NA	NA	NA	NA	NA	NA	NA	NA	NA	NA	NA	NA	NA	NA	NA	NA	NA	NA	NA	NA	NA	NA	NA	NA
MIMAT0026625	0.3514	0.1532	NA	0.634	0.3674	0.2677	NA	NA	NA	0.692834	3.23492	NA	0.5635	1.0038	NA	0.5277	1.74282	0.743723	0.2505	1.41239	0.5436	1.09923	0.873949	0.2172	2.72842	1.37464	1.22291	0.4456	1.88536	0.146	0.1761	0.2888	0.7181	0.2141	NA	1.329	NA	0.1601	1.12435	0.2701	0.361955	1.34412	0.1992	1.37978	0.371899	NA	0.682585	0.3735	NA
MIMAT0018940	NA	NA	NA	NA	NA	NA	0.2515	NA	NA	NA	0.2525	NA	NA	NA	NA	NA	NA	NA	NA	NA	0.2972	NA	NA	NA	0.1814	NA	NA	0.4456	NA	NA	NA	NA	NA	NA	NA	NA	NA	NA	NA	NA	NA	NA	NA	0.1808	NA	NA	NA	NA	NA
MIMAT0018941	NA	NA	NA	NA	NA	NA	NA	NA	0.446	0.2696	0.2525	NA	NA	NA	NA	NA	NA	NA	NA	NA	NA	NA	NA	NA	NA	NA	0.2517	NA	NA	NA	NA	NA	NA	NA	NA	NA	NA	NA	NA	NA	NA	NA	NA	NA	NA	NA	NA	NA	NA
MIMAT0018942	NA	NA	NA	NA	NA	NA	NA	NA	NA	NA	NA	NA	NA	0.3234	NA	NA	NA	NA	NA	NA	NA	NA	NA	NA	NA	NA	NA	NA	0.1823	NA	NA	NA	NA	NA	NA	NA	NA	NA	NA	NA	NA	NA	NA	NA	NA	NA	NA	NA	NA
MIMAT0018943	NA	NA	NA	NA	NA	NA	NA	NA	NA	NA	NA	NA	NA	NA	NA	NA	NA	NA	NA	NA	NA	NA	NA	NA	NA	NA	NA	NA	NA	0.146	NA	NA	NA	NA	NA	NA	NA	NA	NA	NA	NA	NA	NA	NA	NA	NA	NA	NA	NA
MIMAT0018944	NA	0.1532	NA	1.073	NA	NA	NA	NA	NA	NA	NA	NA	NA	NA	NA	NA	NA	NA	NA	NA	NA	NA	NA	NA	NA	NA	NA	NA	NA	0.146	NA	NA	NA	NA	NA	0.2498	0.3161	NA	NA	NA	0.131	NA	NA	NA	0.1979	NA	NA	NA	NA
MIMAT0018947	NA	NA	NA	NA	NA	NA	NA	NA	NA	NA	NA	NA	NA	NA	NA	NA	NA	NA	NA	NA	NA	NA	0.2728	NA	0.1814	NA	NA	NA	NA	NA	NA	NA	NA	NA	NA	NA	NA	0.1601	NA	NA	0.815983	0.3871	NA	NA	NA	NA	NA	NA	NA
MIMAT0018948	NA	NA	NA	NA	NA	NA	NA	NA	NA	NA	NA	NA	NA	NA	NA	NA	NA	NA	NA	NA	NA	NA	NA	NA	NA	NA	NA	NA	NA	NA	NA	NA	NA	NA	NA	NA	NA	NA	NA	NA	NA	NA	NA	NA	NA	NA	NA	NA	NA
MIMAT0018949	NA	0.1532	NA	NA	NA	NA	NA	NA	NA	NA	NA	NA	NA	NA	NA	NA	NA	NA	NA	NA	NA	NA	NA	NA	NA	NA	NA	NA	NA	NA	NA	NA	NA	NA	NA	NA	NA	0.1601	NA	NA	NA	NA	NA	NA	NA	NA	NA	NA	NA
MIMAT0004683	1.55118	1.59257	3.15859	1.55171	2.70268	3.91367	2.08328	NA	0.7863	2.9975	1.33913	2.08017	1.99535	2.6502	0.6202	2.27132	1.61049	1.88673	2.74172	2.04934	1.99066	0.543004	1.41434	1.91132	1.65246	2.15429	1.87504	0.78556	2.44509	0.616	1.3549	2.75739	1.96447	0.5656	1.64403	2.60974	1.30433	1.12006	2.18262	1.79538	0.735891	2.36584	0.530163	1.8225	1.92323	1.2299	1.41347	1.75025	1.68765
MIMAT0004681	1.90994	1.36067	2.46759	2.10807	2.25398	2.91178	2.57327	NA	1.8222	2.75559	1.80165	1.1962	2.15863	2.00566	1.3848	1.86783	2.35256	2.86699	2.07847	3.40627	2.3556	1.71581	1.1693	2.66919	3.27932	2.65761	5.48038	1.96167	2.0351	0.61589	1.73842	2.75736	2.07896	1.83193	2.60123	2.07501	2.06504	1.69138	2.835	2.10253	1.22082	4.67052	1.81413	2.4698	1.92325	4.23114	2.11357	2.48047	1.6877
MIMAT0018199	NA	NA	NA	NA	NA	NA	NA	NA	NA	NA	NA	NA	NA	NA	NA	NA	NA	NA	NA	NA	NA	NA	NA	NA	NA	NA	NA	NA	NA	NA	NA	NA	NA	NA	NA	NA	NA	NA	NA	NA	NA	NA	NA	NA	NA	NA	NA	NA	NA
MIMAT0027426	NA	NA	0.4622	NA	0.3674	NA	NA	1.61073	0.446	NA	0.46732	NA	NA	NA	NA	NA	0.666009	NA	0.2505	NA	NA	0.2969	NA	NA	0.342518	NA	0.2517	0.4456	NA	NA	NA	NA	NA	NA	0.408219	NA	NA	0.1601	NA	0.2701	0.131	NA	0.374203	0.1808	NA	NA	NA	NA	0.964912
MIMAT0019705	NA	NA	NA	NA	NA	NA	NA	NA	NA	NA	NA	NA	NA	NA	NA	NA	NA	NA	NA	0.2445	NA	0.2969	NA	NA	NA	NA	NA	NA	NA	NA	NA	NA	0.4033	NA	NA	NA	NA	NA	NA	NA	NA	NA	NA	NA	NA	NA	NA	NA	NA
MIMAT0018197	0.8698	0.835132	NA	1.4091	1.29274	0.860536	1.71599	NA	0.446	NA	0.819679	0.718783	0.675727	0.587415	0.6202	1.30571	1.11997	NA	0.6497	1.07585	1.10019	1.09924	1.02919	1.20144	0.1814	1.37465	NA	1.0605	0.958315	0.146	0.333	1.68531	1.38549	0.2141	0.575864	1.43361	0.794837	0.666063	NA	0.2701	0.651062	0.823266	0.670923	0.7378	0.794902	1.28779	1.0418	0.915762	0.708964
MIMAT0019707	NA	NA	NA	NA	NA	NA	0.2515	0.7525	0.446	NA	0.65426	NA	NA	NA	NA	NA	NA	NA	NA	NA	0.2972	NA	NA	NA	NA	NA	NA	NA	NA	NA	0.333	NA	NA	NA	NA	NA	NA	NA	NA	NA	NA	NA	NA	NA	0.1979	NA	NA	0.1988	NA
MIMAT0019706	NA	0.922997	NA	0.634082	NA	0.2677	1.09941	NA	0.446	0.692803	1.33913	0.4037	NA	NA	0.6202	NA	0.3711	0.535746	0.2505	0.63603	0.2972	0.543004	1.02915	NA	NA	0.614462	0.652443	0.78556	0.489685	NA	NA	NA	0.976429	NA	0.725893	NA	NA	0.769009	0.3057	0.693993	0.651062	0.2065	0.1992	0.48598	0.371899	0.469271	0.381281	0.798032	NA
MIMAT0019701	NA	NA	NA	NA	NA	0.2677	NA	NA	NA	NA	NA	NA	0.1628	0.3234	NA	NA	NA	NA	0.2505	NA	NA	NA	NA	NA	NA	NA	NA	NA	0.1823	NA	NA	NA	NA	NA	NA	NA	NA	NA	NA	NA	NA	NA	NA	NA	NA	NA	NA	NA	NA
MIMAT0019700	NA	0.1532	NA	NA	NA	NA	0.2515	0.7525	NA	0.2696	0.2525	0.4037	0.1628	0.587415	NA	0.1981	0.666009	NA	0.2505	0.635936	NA	1.09923	0.2728	0.722349	0.1814	0.614462	NA	NA	0.621894	NA	NA	NA	NA	NA	0.408219	NA	NA	0.435195	NA	NA	0.131	NA	NA	NA	NA	0.1324	0.381281	0.529301	NA
MIMAT0019703	NA	NA	NA	0.3516	NA	NA	NA	NA	NA	NA	NA	NA	NA	NA	NA	NA	NA	NA	NA	NA	NA	NA	NA	NA	NA	NA	NA	NA	NA	NA	NA	NA	NA	NA	NA	0.2498	NA	NA	NA	NA	NA	NA	NA	NA	NA	NA	NA	0.1988	NA
MIMAT0019702	NA	NA	NA	NA	NA	NA	NA	NA	NA	NA	NA	NA	0.1628	NA	NA	NA	NA	NA	NA	NA	NA	NA	NA	NA	NA	NA	NA	NA	NA	NA	NA	NA	NA	NA	NA	NA	NA	NA	NA	NA	NA	NA	NA	NA	NA	NA	NA	NA	0.3976
MIMAT0019709	NA	NA	NA	0.3516	NA	0.493416	NA	NA	0.786192	0.2696	NA	NA	0.1628	NA	NA	NA	NA	0.2926	NA	NA	NA	NA	NA	0.2172	NA	0.3397	NA	NA	0.344127	0.146	0.333024	0.2888	NA	NA	NA	NA	0.3161	0.1601	0.3057	NA	NA	0.2065	0.1992	0.1808	NA	0.2536	0.2032	0.669999	0.708964
MIMAT0019708	NA	NA	NA	NA	NA	NA	NA	NA	NA	NA	NA	NA	0.1628	0.3234	NA	0.3723	NA	NA	NA	NA	0.2972	0.2969	NA	NA	NA	NA	NA	NA	0.344127	NA	NA	NA	NA	NA	NA	0.2498	NA	0.1601	NA	NA	NA	NA	0.5301	NA	NA	NA	NA	NA	NA
MIMAT0007892	NA	NA	NA	NA	NA	NA	NA	NA	NA	NA	0.2525	NA	NA	NA	NA	NA	NA	NA	NA	NA	NA	NA	NA	NA	NA	NA	NA	NA	NA	NA	NA	NA	NA	NA	NA	NA	NA	NA	0.3057	NA	NA	NA	NA	NA	NA	NA	NA	NA	NA
MIMAT0007890	NA	NA	NA	NA	NA	NA	NA	NA	NA	NA	NA	NA	NA	NA	NA	NA	NA	NA	0.2505	NA	NA	NA	NA	NA	NA	NA	NA	NA	NA	NA	NA	NA	NA	NA	NA	NA	NA	NA	NA	NA	NA	NA	NA	NA	NA	NA	0.2032	NA	NA
MIMAT0007891	NA	NA	NA	NA	NA	NA	NA	NA	NA	NA	0.2525	NA	NA	NA	NA	NA	NA	NA	NA	NA	NA	NA	NA	NA	NA	NA	NA	NA	0.1823	NA	NA	NA	NA	NA	NA	0.2498	NA	NA	NA	NA	0.251089	NA	NA	NA	NA	NA	NA	NA	0.3976
MIMAT0018122	NA	NA	NA	NA	NA	NA	NA	NA	NA	NA	NA	NA	NA	NA	NA	0.1981	NA	NA	NA	NA	0.5436	NA	NA	NA	NA	NA	NA	NA	0.3442	NA	NA	NA	NA	NA	NA	NA	NA	NA	NA	NA	NA	NA	NA	NA	NA	NA	NA	NA	NA
MIMAT0018120	NA	NA	0.4622	1.073	0.3674	NA	0.817031	0.7525	1.29236	0.865437	1.44427	0.4037	0.1628	1.00368	0.6202	0.527631	0.666009	NA	0.463872	0.798006	0.2972	0.2969	0.700015	0.572818	NA	NA	NA	0.4456	0.958225	0.278573	0.830996	NA	NA	0.565539	1.39772	NA	0.3161	0.3042	0.772354	0.2701	0.464939	NA	0.916952	0.1808	0.527064	0.1324	0.812514	0.373494	0.3976
MIMAT0018121	NA	NA	NA	NA	NA	NA	NA	NA	NA	NA	NA	NA	NA	NA	NA	NA	NA	NA	NA	NA	NA	NA	NA	NA	NA	NA	NA	NA	NA	NA	NA	NA	NA	NA	NA	NA	NA	NA	NA	NA	NA	NA	NA	NA	NA	NA	NA	NA	NA
MIMAT0019895	NA	NA	NA	NA	NA	NA	NA	NA	NA	NA	NA	NA	NA	0.3234	NA	NA	NA	NA	NA	NA	NA	0.2969	NA	NA	NA	NA	NA	NA	NA	NA	NA	0.2888	NA	0.2141	NA	0.4626	NA	0.3042	0.3057	NA	NA	NA	NA	NA	0.1979	NA	0.2032	NA	NA
MIMAT0019894	NA	0.417953	NA	NA	NA	NA	NA	NA	0.7863	0.692834	NA	1.38637	0.563519	0.81058	NA	NA	NA	0.2926	0.2505	0.453506	0.54351	0.2969	0.2728	0.2172	0.1814	0.3397	NA	NA	0.344127	0.146	0.603369	NA	NA	NA	NA	NA	0.3161	NA	NA	0.694	0.251089	NA	NA	NA	0.1979	NA	NA	NA	NA
MIMAT0019897	NA	NA	NA	NA	NA	NA	NA	NA	NA	NA	NA	NA	NA	NA	NA	NA	NA	NA	NA	NA	NA	NA	NA	NA	NA	NA	NA	NA	NA	NA	NA	NA	NA	NA	0.2185	NA	NA	NA	NA	NA	NA	NA	NA	0.1808	NA	NA	NA	NA	NA
MIMAT0019896	NA	0.1532	NA	0.3516	0.3674	NA	0.465597	1.24453	NA	NA	NA	NA	0.1628	NA	NA	NA	NA	0.2926	0.2505	0.2445	NA	NA	NA	NA	NA	NA	NA	0.4456	NA	0.146	0.1761	0.2888	NA	0.2141	0.725893	NA	0.3161	NA	NA	NA	NA	0.2065	0.374203	NA	NA	0.1324	0.2032	NA	0.3976
MIMAT0019891	NA	NA	NA	NA	NA	NA	NA	NA	NA	NA	0.6542	NA	NA	NA	NA	NA	NA	NA	NA	NA	NA	NA	NA	NA	NA	NA	NA	0.7856	0.1823	NA	0.1761	NA	NA	0.2141	NA	NA	NA	NA	0.3057	NA	NA	NA	NA	NA	NA	0.1324	NA	NA	NA
MIMAT0019890	0.3514	NA	NA	NA	NA	NA	NA	NA	NA	0.4967	0.2525	0.4037	NA	NA	NA	NA	NA	NA	NA	NA	NA	NA	NA	0.2172	NA	NA	0.2517	0.78556	0.344127	NA	0.1761	NA	0.4033	0.565633	0.575758	0.2498	0.3161	0.1601	NA	NA	NA	NA	NA	NA	0.527064	0.1324	0.2032	NA	NA
MIMAT0019893	0.3514	NA	NA	NA	NA	NA	0.465597	NA	NA	NA	NA	NA	NA	NA	NA	NA	NA	NA	0.2505	NA	NA	NA	NA	NA	NA	0.3397	0.2517	NA	0.1823	NA	NA	NA	0.4033	NA	NA	NA	NA	0.1601	NA	NA	NA	NA	NA	0.1808	NA	NA	NA	NA	NA
MIMAT0019892	NA	NA	NA	0.3516	NA	NA	0.2515	NA	NA	NA	NA	NA	NA	NA	NA	NA	NA	NA	0.2505	0.2445	NA	NA	NA	NA	NA	0.3397	NA	NA	NA	0.146	NA	NA	NA	NA	NA	NA	NA	0.1601	NA	NA	NA	NA	NA	NA	0.371899	NA	NA	0.1988	NA
MIMAT0019899	NA	NA	NA	NA	NA	NA	NA	NA	NA	NA	NA	NA	NA	NA	NA	NA	NA	NA	NA	NA	NA	NA	NA	NA	NA	0.3397	NA	NA	NA	NA	NA	NA	NA	NA	NA	NA	NA	NA	NA	NA	NA	NA	NA	NA	NA	NA	NA	NA	NA
MIMAT0019898	NA	NA	NA	NA	NA	NA	NA	NA	NA	NA	NA	NA	NA	NA	NA	NA	NA	NA	NA	NA	NA	NA	NA	NA	NA	0.3397	NA	NA	NA	NA	0.1761	NA	NA	NA	NA	NA	NA	NA	NA	NA	NA	NA	NA	0.1808	NA	NA	NA	NA	NA
MIMAT0005924	0.869743	1.08418	1.53011	NA	1.45419	1.60362	0.4656	2.35278	1.29221	2.8408	2.71068	1.84112	1.35236	1.00374	2.07817	1.614	NA	0.535746	1.33167	2.82654	0.937435	1.24544	0.502128	0.2172	1.98096	1.04408	2.52723	1.49024	3.49037	0.712816	0.1761	1.07586	0.4033	NA	0.575758	1.09365	0.3161	0.3042	3.73018	2.46729	NA	0.69201	1.31054	1.76692	0.527064	0.469306	1.32915	3.11835	0.3976
MIMAT0005925	NA	NA	NA	NA	NA	NA	NA	NA	NA	NA	NA	NA	NA	NA	NA	NA	NA	NA	NA	NA	NA	NA	NA	NA	NA	NA	NA	NA	NA	NA	NA	NA	NA	NA	NA	NA	NA	NA	NA	NA	NA	NA	NA	NA	NA	NA	NA	NA	NA
MIMAT0005920	3.65346	4.67399	4.79748	3.68542	3.58736	3.37579	4.75974	6.5668	4.63874	4.30002	5.76947	5.8455	3.96135	3.32874	4.85453	3.84764	4.12341	2.45856	3.71544	5.5931	2.69839	4.96149	5.67132	2.90648	2.99403	4.65304	3.7632	3.16369	5.12717	1.87304	4.30909	2.60808	3.92506	3.53117	5.53245	4.12484	3.46507	4.23552	4.44402	3.38851	2.95401	2.60355	5.34066	3.12835	3.06171	3.98192	4.1772	3.38641	4.8856
MIMAT0005921	NA	NA	NA	NA	NA	NA	NA	NA	NA	NA	NA	NA	NA	NA	NA	NA	NA	NA	NA	NA	NA	NA	NA	NA	NA	NA	NA	NA	NA	NA	NA	NA	NA	NA	NA	0.462664	NA	NA	NA	NA	NA	0.2065	NA	NA	NA	NA	NA	NA	NA
MIMAT0005923	0.633753	3.10699	0.811703	9.03087	0.3674	0.688622	3.13881	7.51661	1.66622	0.692834	7.88056	0.4037	0.309078	0.3234	3.09081	3.23131	NA	0.5357	4.26327	0.797865	7.69917	8.19689	2.93758	5.29783	8.05465	5.51099	0.652407	6.11675	7.61921	NA	0.333024	0.2888	9.75548	1.7657	10.3848	10.1213	6.71907	0.865104	0.557813	2.29642	9.75418	0.3871	1.22162	5.79728	2.95638	1.6828	1.41349	0.1988	0.965
MIMAT0005929	NA	NA	NA	0.634	NA	0.493416	1.33547	NA	1.82215	1.61104	1.54225	NA	0.675735	NA	0.6202	NA	0.666009	0.743723	NA	2.04933	0.937503	0.2969	0.700015	0.2172	0.342518	NA	0.2517	0.78556	NA	NA	0.47452	0.529319	0.4033	0.2141	1.20659	NA	0.3161	0.555293	0.3057	0.2701	NA	0.38711	2.23283	0.1808	0.1979	0.742219	0.539793	0.669999	1.18225
MIMAT0021045	NA	NA	NA	NA	NA	NA	NA	NA	NA	NA	NA	NA	NA	NA	NA	NA	NA	NA	NA	NA	NA	NA	NA	NA	NA	NA	NA	NA	NA	NA	NA	NA	NA	NA	NA	NA	NA	NA	NA	NA	NA	NA	NA	NA	NA	NA	NA	NA	NA
MIMAT0021044	1.07259	0.291682	0.8116	NA	0.903037	1.01405	1.22226	2.14516	NA	1.01961	2.32657	1.84111	0.77984	1.58997	NA	2.27128	1.11997	1.48474	1.21871	1.07583	0.2972	2.35399	0.2728	1.20138	1.71265	1.21879	1.10001	1.06052	1.88534	NA	0.6034	0.2888	0.4033	0.4006	0.861826	0.6481	0.985353	1.12006	1.27262	1.02121	1.6719	0.547595	0.67098	0.952083	0.527	0.822779	1.0418	0.5294	0.965
MIMAT0021046	NA	NA	NA	NA	NA	NA	NA	NA	NA	NA	NA	NA	NA	NA	NA	NA	NA	NA	NA	NA	NA	NA	NA	NA	NA	NA	NA	NA	NA	NA	NA	NA	NA	NA	NA	NA	NA	NA	NA	NA	NA	NA	NA	NA	NA	NA	NA	NA	NA
MIMAT0021041	NA	0.417953	NA	0.3516	NA	NA	0.2515	NA	NA	NA	NA	NA	NA	NA	NA	NA	NA	NA	NA	NA	NA	NA	NA	NA	NA	0.3397	0.4659	NA	0.1823	NA	NA	0.2888	NA	0.4006	0.2185	NA	NA	NA	NA	NA	NA	NA	NA	NA	NA	NA	NA	0.1988	NA
MIMAT0021040	NA	0.417953	NA	0.3516	NA	NA	NA	0.7525	NA	0.2696	0.2525	NA	NA	NA	NA	NA	NA	NA	NA	NA	NA	NA	NA	NA	0.1814	0.614462	NA	NA	0.3442	NA	NA	NA	NA	NA	NA	0.2498	NA	NA	NA	NA	NA	0.2065	NA	0.1808	NA	0.1324	NA	NA	NA
MIMAT0021043	NA	NA	NA	NA	0.659972	NA	0.2515	NA	0.446	0.2696	0.2525	NA	NA	0.3234	NA	0.1981	NA	NA	NA	NA	NA	0.2969	NA	NA	0.1814	0.3397	NA	0.4456	0.1823	NA	NA	0.5293	NA	NA	NA	0.2498	0.794806	NA	NA	NA	NA	NA	0.1992	NA	0.1979	NA	0.2032	NA	0.3976
MIMAT0021042	NA	NA	NA	NA	NA	NA	NA	NA	0.446	NA	0.2525	NA	NA	NA	NA	NA	NA	NA	NA	NA	NA	NA	NA	NA	NA	NA	NA	NA	NA	NA	NA	NA	NA	NA	NA	NA	NA	NA	NA	NA	NA	NA	NA	NA	NA	NA	NA	NA	NA
MIMAT0000264	14.0126	12.5501	12.9904	10.77	8.51613	12.8916	12.2419	10.8239	13.699	10.5408	10.0021	13.3893	11.0281	9.70671	13.4846	11.3871	13.6103	10.1373	11.2669	8.02173	10.4305	13.6728	13.8001	10.2397	11.2183	11.0407	14.1528	5.59711	12.7436	10.9093	10.8623	11.6467	13.1582	12.4654	10.4208	12.038	11.5006	13.98	11.8802	7.18744	12.459	10.7377	14.0398	11.9143	9.97144	13.6382	9.59965	10.3551	9.14676
MIMAT0000265	1.07254	0.922944	2.65217	1.25078	4.82066	6.24872	3.56745	2.1451	0.446	1.70495	2.27044	3.41762	2.33986	3.43311	3.26216	0.372254	1.61053	3.28812	2.07845	4.04537	1.10027	1.0992	0.699952	2.38509	2.36554	2.31678	0.465942	1.29138	2.92621	2.14028	1.49435	2.89272	1.7038	0.713681	2.09411	3.21991	1.978	1.58252	NA	0.2701	3.51814	2.48966	1.31047	0.848873	1.86622	4.06708	1.83641	1.98381	1.68764
MIMAT0000266	5.0319	6.09644	7.1861	3.6854	9.63961	4.68226	3.56744	1.90257	3.22231	3.84356	3.04743	7.95782	8.5544	3.39914	5.2298	7.31788	6.62486	4.9285	3.60736	9.59539	11.4206	11.0042	2.93758	3.23989	6.73935	9.79915	4.02205	11.6147	9.83304	3.1159	4.82072	5.55748	6.56758	3.83607	13.0036	9.84857	10.0454	6.84775	2.02426	13.7636	6.3218	10.8415	2.66191	9.13078	2.71936	8.32444	6.79389	10.0329	6.44817
MIMAT0000267	9.6172	10.7406	11.0066	8.25041	12.2285	7.15089	12.1486	9.17702	8.50926	7.37144	10.9204	8.98927	7.62875	9.97114	5.71598	10.6664	10.1269	8.52763	9.68245	12.3016	10.7658	12.5279	11.7964	9.38306	11.2384	11.4547	12.2702	11.2689	11.826	2.66123	5.58085	3.98616	10.1165	9.79433	11.0772	10.6719	8.99232	12.0703	10.3002	12.1209	10.6499	10.9103	8.22884	11.158	5.88774	11.6347	8.09404	8.85	9.56156
MIMAT0000260	0.633753	0.291682	NA	NA	NA	0.2677	0.2515	NA	NA	NA	NA	NA	NA	0.81058	NA	NA	0.3711	NA	0.2505	NA	NA	0.936517	0.2728	NA	0.342518	NA	0.2517	NA	0.621894	NA	NA	NA	NA	0.2141	NA	0.2498	0.3161	0.1601	0.958996	1.1605	1.09807	NA	NA	0.1808	NA	0.822858	0.2032	0.798105	NA
MIMAT0000261	11.2156	12.0406	13.2088	14.4706	13.8404	10.9836	12.2728	10.6723	13.019	13.076	11.3785	12.6177	13.3431	15.0176	12.2505	11.6977	12.4711	12.9459	14.0445	11.7096	12.1499	14.3928	12.2596	12.6795	13.5802	12.1812	12.1338	13.1846	14.1395	9.61158	14.4323	10.962	13.4844	15.3694	13.4262	13.1719	13.2502	12.4829	14.9372	15.9519	15.6362	11.8658	13.624	13.1172	11.6711	13.5385	13.245	14.0511	14.0107
MIMAT0000262	3.48596	5.18108	4.77781	2.50865	1.96348	4.00813	3.7002	NA	0.7863	1.15887	0.9681	3.32771	4.58144	4.29256	1.3848	2.87385	3.10894	2.33542	4.68094	8.44587	2.35554	5.17721	4.69934	1.29989	6.14303	5.86655	8.3306	NA	6.61467	1.74129	2.47081	1.78145	4.51923	1.54604	6.52452	5.01697	4.03842	3.92594	5.23179	6.74489	1.94554	3.87726	2.23286	6.37004	3.1834	7.54593	2.84824	4.97452	5.8531
MIMAT0000263	8.27049	7.98299	7.02386	5.70175	7.58146	7.36768	7.98491	2.35277	6.18453	6.47147	4.67127	7.73546	8.24518	7.3136	6.41499	5.25721	8.07065	7.94815	7.40252	8.903	8.14975	6.78404	6.39336	8.23385	8.94027	8.11568	6.94441	5.42549	7.00348	5.25453	6.4864	6.04288	7.21639	6.47067	6.57982	7.86736	7.00975	7.33045	8.39169	7.10137	5.99628	8.30934	6.50776	8.67609	6.58869	6.97109	6.03526	6.25197	4.18083
MIMAT0000268	0.633753	NA	NA	0.634082	NA	0.688622	NA	NA	1.66613	NA	1.72024	1.5544	0.563592	NA	1.3848	NA	0.3711	0.2926	NA	0.2445	0.7539	NA	NA	0.4059	NA	NA	0.2517	NA	NA	0.400007	0.333024	NA	NA	0.2141	0.7259	NA	NA	NA	NA	NA	0.131	0.38711	0.530163	NA	0.1979	0.253664	0.2032	NA	NA
MIMAT0000269	2.57638	2.36291	1.86514	2.70458	3.09424	1.01405	4.19619	1.61073	2.51346	3.10476	3.88453	2.95977	1.5999	2.39844	2.67158	2.55038	2.71681	2.45853	4.14458	3.87424	1.9051	2.97341	2.30895	2.33947	2.40256	3.83535	2.82748	3.32868	2.82011	0.712834	5.54917	2.31875	3.12767	4.21736	2.71338	3.38563	3.06155	3.45611	3.09617	3.35983	2.82455	2.9863	3.34727	2.39849	3.5879	2.91363	4.22465	2.03676	4.72178
MIMAT0002808	3.83169	3.93885	4.51733	4.99566	3.75168	5.06278	4.65456	4.06585	2.20875	3.29802	4.69274	6.53437	5.9803	4.51502	4.62255	6.32819	3.41703	3.50365	4.03208	6.49189	3.9026	5.18631	2.89784	4.23799	5.79866	5.3419	3.23047	6.25988	3.93359	2.82198	3.88364	4.32612	4.25252	3.40606	3.00537	5.01698	4.01679	3.25797	4.62045	3.10747	2.63885	5.89414	4.89318	4.43931	4.83227	4.63983	4.41056	4.05862	3.3951
MIMAT0002809	9.77314	8.11941	10.7493	9.14496	9.47177	11.3083	9.96285	6.13236	8.84333	9.85429	9.82088	10.6445	9.95941	10.8841	10.3642	11.4985	10.7781	10.5037	11.2195	10.5945	10.8659	9.81925	9.26905	11.3105	10.664	10.0842	11.279	10.5218	9.99224	10.1072	9.28802	10.9968	9.4812	10.1436	9.25571	9.63295	9.45946	8.94936	10.7767	8.61787	8.51547	10.2049	10.5815	10.8421	9.84269	9.8564	10.3145	10.1647	9.09242
MIMAT0002806	NA	0.534076	0.4622	1.8005	0.3674	3.22664	0.2515	3.49439	NA	0.2696	0.654242	0.4037	0.563519	NA	1.3848	0.1981	NA	NA	0.463872	0.4534	0.2972	0.2969	NA	0.2172	0.4874	0.614462	NA	NA	NA	2.50755	NA	0.529319	NA	0.565633	NA	0.4626	0.3161	NA	NA	2.35564	2.54792	NA	NA	NA	0.371899	0.469216	0.2032	NA	NA
MIMAT0002807	1.0726	1.6453	2.13694	1.68148	1.9635	1.78533	1.53826	3.09278	1.66622	0.865437	1.10268	1.70488	1.41831	1.59004	2.99689	1.30577	1.4648	1.36392	2.3167	3.32887	1.61303	3.055	0.7	2.5137	2.07573	2.88196	1.33606	2.41752	2.12697	0.511986	2.17153	0.735394	1.5534	0.8481	1.5665	0.648065	2.36855	2.56772	2.45514	1.1606	0.815961	1.3441	2.32099	2.1608	1.61256	2.60732	2.00902	1.39247	0.964942
MIMAT0002804	NA	NA	NA	2.01268	NA	NA	NA	NA	NA	NA	NA	NA	0.1628	NA	0.6202	NA	NA	NA	NA	NA	0.54351	NA	NA	NA	NA	NA	NA	NA	NA	0.146	NA	NA	NA	NA	NA	1.53123	1.4408	NA	NA	NA	0.735851	NA	NA	NA	NA	NA	NA	NA	NA
MIMAT0002805	NA	0.291682	1.09275	NA	NA	NA	0.2515	NA	NA	0.2696	2.53131	NA	NA	0.8106	NA	NA	0.910745	0.2926	0.2505	2.11231	0.2972	NA	0.2728	0.4059	2.81335	0.845206	1.53898	0.4456	1.3877	NA	0.333024	0.7354	0.4033	NA	0.4081	1.32899	0.3161	0.5552	0.5577	NA	NA	1.85434	0.374203	1.13855	NA	NA	0.381281	0.1988	NA
MIMAT0027472	NA	NA	NA	NA	NA	NA	NA	NA	NA	NA	NA	NA	NA	NA	NA	NA	NA	NA	NA	NA	0.2972	NA	NA	NA	NA	NA	NA	NA	NA	NA	NA	NA	NA	NA	0.2185	NA	NA	NA	NA	NA	NA	NA	NA	NA	NA	NA	NA	NA	NA
MIMAT0027473	NA	NA	0.4622	NA	NA	NA	NA	1.61073	NA	NA	NA	NA	NA	NA	NA	NA	NA	0.2926	NA	0.453506	NA	NA	NA	NA	0.1814	NA	NA	NA	0.1823	NA	NA	NA	0.4033	NA	0.4081	NA	NA	NA	NA	NA	0.251089	NA	NA	NA	NA	NA	NA	NA	NA
MIMAT0027470	NA	NA	NA	NA	0.3674	NA	NA	NA	NA	NA	0.2525	NA	NA	0.587415	NA	NA	NA	NA	NA	NA	NA	NA	NA	NA	NA	0.3397	NA	NA	NA	NA	NA	NA	0.4033	NA	NA	NA	NA	0.1601	NA	NA	0.251089	NA	NA	NA	NA	NA	NA	0.1988	NA
MIMAT0027471	NA	NA	NA	NA	NA	NA	NA	0.7525	NA	0.2696	NA	NA	NA	NA	NA	NA	NA	NA	NA	NA	NA	0.5429	NA	NA	NA	NA	NA	NA	0.1823	NA	NA	NA	NA	NA	NA	NA	NA	NA	NA	NA	0.131	NA	0.1992	NA	NA	NA	NA	NA	NA
MIMAT0027476	NA	NA	NA	NA	NA	NA	NA	0.7525	NA	0.2696	NA	NA	NA	0.3234	NA	NA	0.3711	NA	NA	NA	NA	NA	NA	0.2172	NA	NA	NA	NA	NA	NA	NA	NA	NA	NA	NA	NA	NA	0.1601	NA	0.2701	NA	NA	0.3741	NA	NA	0.365462	NA	NA	NA
MIMAT0027477	NA	NA	NA	NA	NA	0.2677	NA	1.24453	0.446	NA	0.2525	NA	0.309078	0.3234	0.6202	NA	NA	NA	0.4639	0.2445	NA	NA	NA	NA	0.1814	0.3397	0.2517	NA	0.1823	0.146	0.333	0.529319	0.4033	NA	NA	NA	NA	NA	NA	0.4976	NA	0.2065	NA	NA	0.1979	0.1324	0.2032	0.1988	NA
MIMAT0027474	NA	0.1532	NA	NA	0.3674	NA	NA	NA	NA	NA	NA	NA	NA	NA	NA	NA	NA	NA	NA	NA	NA	NA	0.2728	NA	NA	NA	NA	NA	NA	NA	NA	NA	0.4033	NA	NA	NA	NA	NA	0.3057	NA	NA	NA	NA	NA	NA	NA	NA	NA	NA
MIMAT0027475	0.3514	NA	NA	NA	NA	NA	0.651989	NA	NA	NA	NA	NA	NA	NA	NA	0.1981	NA	NA	NA	NA	NA	0.2969	0.2728	NA	NA	NA	0.2517	NA	NA	NA	0.1761	NA	NA	0.2141	NA	NA	0.3161	NA	NA	0.2701	NA	NA	NA	NA	NA	0.1324	0.2032	NA	NA
MIMAT0027478	NA	NA	NA	NA	NA	NA	NA	NA	NA	NA	NA	NA	NA	NA	NA	NA	NA	NA	NA	NA	NA	NA	NA	NA	NA	NA	NA	NA	NA	NA	NA	NA	NA	NA	NA	NA	NA	NA	NA	NA	0.131	NA	NA	NA	NA	NA	NA	NA	0.3976
MIMAT0027479	NA	NA	NA	NA	NA	NA	0.4656	NA	NA	NA	NA	NA	NA	NA	NA	NA	NA	NA	NA	NA	NA	NA	0.2728	NA	NA	NA	NA	NA	0.3442	NA	NA	NA	NA	0.2141	NA	NA	NA	NA	NA	NA	0.131	NA	NA	NA	NA	NA	NA	NA	NA
MIMAT0027659	0.6337	0.2916	NA	0.3516	NA	0.2677	0.2515	NA	NA	0.6928	NA	0.4037	0.3091	NA	NA	0.372254	NA	NA	NA	0.63603	NA	0.2969	NA	0.4059	0.342518	NA	NA	0.4456	NA	NA	NA	NA	NA	NA	0.4081	NA	0.3161	0.1601	NA	0.693993	0.131	0.547595	0.1992	0.48603	0.1979	0.253664	0.2032	NA	0.3976
MIMAT0027652	NA	NA	NA	NA	NA	NA	NA	NA	NA	NA	NA	NA	NA	NA	NA	NA	NA	NA	NA	NA	NA	NA	NA	NA	NA	0.3397	NA	NA	NA	NA	NA	NA	NA	NA	NA	NA	NA	NA	NA	NA	NA	NA	NA	NA	NA	NA	NA	NA	NA
MIMAT0027653	NA	NA	NA	NA	NA	NA	NA	NA	NA	NA	NA	NA	NA	NA	NA	NA	NA	NA	NA	NA	NA	NA	NA	0.2172	NA	NA	NA	NA	NA	NA	NA	NA	NA	NA	NA	NA	NA	NA	NA	NA	NA	NA	0.1992	NA	NA	NA	NA	NA	NA
MIMAT0027650	NA	0.417953	0.4622	NA	0.903098	0.493416	NA	0.7525	NA	0.2696	0.968134	0.4037	NA	NA	NA	0.795769	NA	0.2926	0.463872	0.2445	0.2972	0.2969	0.2728	0.2172	0.342518	0.3397	NA	1.06052	0.344127	0.4	0.603371	NA	NA	0.4006	0.408219	0.2498	0.575236	0.3042	0.3057	0.693921	NA	NA	0.799193	0.3415	0.794849	0.2536	0.381281	0.915689	NA
MIMAT0027651	NA	NA	NA	NA	NA	NA	NA	NA	NA	NA	NA	NA	NA	NA	NA	NA	NA	NA	NA	NA	NA	NA	NA	NA	0.1814	0.3397	NA	NA	0.1823	NA	0.333024	NA	NA	NA	NA	NA	NA	0.4351	NA	NA	NA	NA	NA	NA	NA	NA	NA	NA	0.3976
MIMAT0027656	NA	NA	NA	NA	NA	NA	NA	NA	NA	NA	NA	NA	NA	0.3234	NA	NA	NA	NA	NA	NA	NA	NA	NA	NA	0.1814	NA	NA	NA	NA	NA	NA	NA	NA	NA	NA	NA	NA	NA	NA	0.4976	0.131	NA	0.374203	NA	NA	NA	0.2032	0.1988	NA
MIMAT0027657	NA	0.1532	NA	NA	NA	NA	NA	NA	NA	NA	NA	NA	NA	NA	NA	NA	NA	NA	NA	NA	NA	NA	NA	NA	NA	NA	NA	NA	NA	NA	NA	NA	NA	NA	NA	NA	NA	NA	NA	NA	NA	NA	NA	NA	NA	NA	NA	NA	NA
MIMAT0027654	NA	0.291682	NA	1.68152	0.903037	0.2677	0.2515	NA	1.29229	0.692803	0.2525	NA	NA	0.3234	0.6202	NA	NA	NA	NA	NA	0.2972	NA	NA	0.572818	0.1814	0.3397	0.2517	NA	0.742887	NA	0.1761	0.2888	0.718139	0.565539	1.10068	0.462664	0.3161	0.555289	0.557813	0.2701	0.131	0.2065	NA	0.1808	0.1979	NA	0.539793	0.915761	0.964942
MIMAT0027655	NA	NA	NA	NA	NA	NA	NA	NA	NA	NA	NA	NA	NA	NA	NA	NA	NA	NA	NA	NA	NA	NA	NA	NA	0.1814	0.3397	NA	NA	NA	NA	NA	NA	NA	NA	NA	NA	NA	NA	NA	NA	0.131	NA	NA	NA	NA	NA	NA	NA	NA
MIMAT0025858	NA	NA	NA	NA	NA	0.2677	NA	NA	NA	NA	NA	NA	NA	NA	NA	NA	NA	NA	NA	NA	NA	NA	NA	NA	NA	0.3397	NA	NA	NA	NA	NA	NA	0.7181	NA	NA	NA	NA	NA	NA	NA	0.131	NA	NA	NA	NA	NA	NA	NA	NA
MIMAT0000066	9.04077	9.7238	9.87837	9.52375	10.6773	10.4888	9.41889	10.6909	11.8465	10.5471	7.60391	11.0681	9.56549	10.2638	12.3887	9.23982	9.15965	10.5767	9.38759	10.0445	9.52277	10.2122	10.2183	9.36	9.77148	9.40004	9.02063	11.1121	9.92807	12.0091	10.3738	11.2298	9.7533	10.2634	10.4923	9.52312	11.3587	9.9663	9.89444	10.6485	9.70031	9.89031	10.7641	10.1398	10.6256	9.8787	10.0551	10.7038	11.2193
MIMAT0000067	12.5979	12.5437	12.8808	12.6675	13.0259	13.6587	11.832	10.8883	14.8823	14.0477	11.0684	12.8435	12.7921	12.476	14.8673	12.8873	11.88	12.5884	12.3133	11.5692	12.1247	12.8927	12.1828	12.2033	12.1606	12.1353	12.4925	14.2014	12.7507	15.6396	12.5101	15.2633	12.3977	14.3983	14.1336	12.0605	13.2399	13.0205	11.7893	12.7193	11.5269	12.3069	13.2896	12.2929	13.8477	13.4758	13.0054	12.8237	14.2678
MIMAT0000064	9.59575	9.64586	9.84858	10.3021	10.7508	11.188	9.71766	10.7489	12.1144	10.3883	9.68769	11.2256	10.5953	9.20417	12.0745	6.98549	8.88133	10.188	10.423	9.83737	9.36357	10.5227	8.5211	10.0914	9.92852	9.37139	8.8217	9.55785	11.0639	11.8652	11.1068	11.5008	9.64128	9.38079	11.4571	10.432	10.2377	8.81786	9.54982	11.3663	9.74333	9.37846	10.4354	9.06684	10.5243	10.867	10.3581	12.5547	8.34291
MIMAT0000065	7.40522	6.72866	7.68409	7.62547	9.14743	7.22352	7.6671	8.36174	8.01454	9.05735	6.16513	7.89074	7.22191	8.27315	8.46279	7.18552	7.08378	7.41193	7.50846	7.58027	7.59208	8.64842	6.47663	7.57176	7.86865	7.67499	7.05397	8.24396	7.71759	7.67486	7.16001	8.28501	7.12599	8.52324	8.92154	7.67127	6.84734	8.61775	7.50025	8.74725	6.52309	7.25332	8.3575	7.54274	7.46722	8.36705	7.45814	6.86485	9.0096
MIMAT0000062	14.9397	14.7719	14.333	14.4544	14.931	15.3124	14.1748	16.5211	16.7216	15.4291	13.4595	15.469	14.3872	13.7269	16.6643	14.1173	13.7577	14.4107	13.9432	13.9425	14.0661	14.668	13.736	14.1018	14.0333	13.9846	14.0497	16.1609	14.4075	16.5333	14.9379	16.0757	14.3252	15.6207	15.6084	13.9632	15.1765	15.1016	13.5727	14.4545	13.132	14.455	14.9351	14.2804	15.0632	14.7486	14.7162	14.1327	15.2155
MIMAT0000063	14.3272	14.0107	13.3844	13.8349	14.329	14.2132	14.2356	15.7926	15.2064	13.9258	12.5688	15.2733	12.9158	12.2786	15.1026	12.6457	13.0348	13.783	13.0758	14.1276	13.101	13.5701	12.6119	13.3834	13.1123	13.6134	12.9373	13.322	13.9854	14.1352	14.2143	14.044	12.5303	13.8819	14.7316	13.6461	13.8951	14.577	12.9	13.8408	11.6521	13.3431	14.2257	13.6175	13.4114	13.6401	13.7419	12.9162	14.5836
MIMAT0000068	7.33304	6.82585	8.09801	6.62471	8.72238	7.93477	7.10379	3.4944	6.47633	6.59008	6.94493	7.44067	7.32657	8.12389	6.48583	8.33259	6.65457	7.65822	8.4152	6.5697	7.93864	6.72294	6.58693	7.72255	7.42594	7.18677	8.02866	6.94194	8.55219	6.17298	5.9484	7.61153	7.62974	7.52773	6.65429	7.41736	6.56332	7.10059	8.14222	7.63429	7.32223	7.42716	6.77479	7.45653	6.33394	6.73506	6.30457	7.05159	5.87664
MIMAT0000069	8.43012	8.02264	9.10034	9.04901	10.3758	8.72423	9.0984	5.48604	7.99823	8.80771	8.9082	8.29394	8.86356	9.23036	8.9265	9.04331	7.64314	8.58373	9.5836	8.44206	9.98203	10.2438	7.7579	9.70647	9.02586	9.31903	8.85292	9.81827	9.72784	8.15037	8.68142	9.90205	9.32962	9.60544	9.39569	9.46987	7.86705	9.81002	8.91902	9.78014	8.42296	8.96046	9.18082	8.0649	8.88387	9.26404	8.8091	8.23562	9.9979
MIMAT0000318	9.69798	9.99176	10.9573	9.2008	9.6163	10.6891	8.4695	11.0503	10.2652	8.95357	5.16984	11.155	10.1726	9.48635	9.43074	8.05919	9.68892	10.1724	8.84809	9.32915	7.76285	9.81379	9.56427	9.88464	8.44245	7.9428	9.58618	1.96167	9.72146	7.85621	9.3314	8.44308	8.94302	9.13199	10.5832	8.55623	9.01505	11.886	10.4651	10.6193	9.14282	8.43587	10.9152	8.5982	8.35587	9.06541	8.83182	8.533	10.3211
MIMAT0004611	2.28127	3.45521	2.36552	3.65417	4.92077	2.02104	3.28694	3.57945	3.27725	4.1578	3.14424	2.69792	2.69962	2.76133	2.54453	2.31464	2.4331	2.05229	2.20246	3.78042	2.47914	3.92266	3.22137	1.39209	1.71266	4.08148	2.08406	2.68442	4.35994	1.59632	4.07361	2.44154	2.62296	3.24499	3.63739	3.27729	3.90324	3.06918	2.51594	4.00289	4.14039	2.52862	3.16885	2.11702	3.45883	2.9137	3.95602	3.59488	3.84083
MIMAT0004610	0.869743	1.15841	0.4622	3.2138	1.59929	1.69733	2.42764	5.72885	0.446	3.17208	3.40085	3.46055	1.9515	0.5875	3.67997	1.02176	0.666009	1.08689	0.814349	2.11235	2.14786	4.25161	0.700015	1.781	1.30673	4.08141	1.10002	2.20751	1.46011	1.74132	1.27972	3.36561	0.976429	1.08412	0.986134	2.99893	1.15369	2.72963	0.3057	0.693993	0.361955	2.13265	2.18671	0.48603	2.39581	2.96781	2.87819	2.13706	1.1823
MIMAT0004613	0.8698	1.29634	1.3279	1.25083	2.16349	NA	1.94737	NA	0.786192	1.15887	2.66782	NA	0.675735	1.00376	0.6202	1.21715	0.6661	1.08689	0.814349	2.28624	0.2972	1.24536	0.699952	0.4059	0.954464	2.31677	0.4659	NA	1.77604	NA	0.1761	NA	1.19537	0.713681	0.9862	0.812432	0.3161	1.03998	1.12431	0.497518	1.33402	1.2539	0.799266	0.952113	NA	1.72537	0.381281	1.92882	0.3976
MIMAT0004612	NA	NA	1.53011	0.3516	1.45415	0.688548	0.465597	NA	0.446	NA	0.4673	NA	0.44188	NA	NA	0.1981	NA	NA	0.2505	1.0758	0.54351	NA	NA	0.2172	0.487436	0.845206	0.2517	NA	0.742942	NA	NA	0.2888	1.19539	NA	1.20662	NA	NA	0.1601	0.557813	0.866832	0.251089	0.2065	0.374203	0.48598	NA	0.365462	0.2032	NA	NA
MIMAT0004615	2.01209	2.08676	1.70735	1.55173	2.16348	3.40387	2.32172	4.82712	1.96285	1.79315	1.4443	3.18134	2.61776	2.32796	2.89636	1.3057	2.43312	2.67715	2.14185	3.06801	1.81411	1.81277	1.1693	1.47873	2.24835	1.97104	1.79807	1.29138	1.31143	2.105	2.17155	1.87155	1.55341	1.46476	1.20655	1.86649	2.065	1.88714	1.84634	0.866825	0.89181	2.18242	1.68724	1.58634	1.80686	2.67399	2.21101	1.3925	1.37109
MIMAT0004614	7.21752	7.26353	5.91371	7.1637	8.26733	7.26046	7.77269	9.31373	7.10039	7.55763	9.90704	9.16506	7.38133	8.26727	7.83422	8.02289	7.56711	7.29286	6.67605	8.54619	7.9032	8.58112	7.89415	6.55086	7.68646	8.02885	6.69395	8.50192	8.68662	6.39923	7.63731	7.15811	8.27596	6.96776	7.25777	6.93719	8.56496	8.46514	7.61237	8.01233	7.43354	7.36255	7.39202	7.86782	8.10326	7.02529	7.17526	7.40729	7.11277
MIMAT0000088	8.41386	9.87805	11.3183	13.5346	11.6633	13.3258	11.2575	11.9308	11.3104	13.0787	11.1925	12.8876	12.928	9.69535	13.4029	8.70197	10.1375	11.5618	10.9835	11.147	11.0585	11.9697	9.88361	10.8547	10.7034	11.7013	10.7039	11.4404	12.2694	14.0261	11.5942	13.5272	11.3946	11.3823	12.0238	11.7786	9.77997	12.2761	9.72134	12.7805	9.46168	11.3265	12.5396	10.1085	11.2795	12.0183	11.7314	9.95775	9.75411
MIMAT0000089	3.03043	0.534076	4.19926	0.634082	8.28889	NA	7.19663	NA	1.4913	2.10019	1.95184	4.25402	1.90619	3.86501	0.6202	1.61401	3.45611	1.59621	0.2505	1.76583	1.81415	4.12508	3.34474	0.572783	3.59937	5.43336	0.6524	8.96588	3.32567	0.146	NA	0.2888	5.33437	1.18905	6.11212	1.53125	2.29843	8.38743	0.959035	7.37275	1.43887	3.11999	0.374203	5.52343	1.68027	2.24737	4.50008	2.0878	0.3976
MIMAT0000084	11.2204	10.6025	10.8082	9.79507	10.5043	10.8054	11.7519	8.9138	9.95976	10.6275	9.17636	9.97355	10.9927	10.0686	9.8747	9.7612	11.2679	10.5511	10.2114	11.6464	11.2431	10.1372	9.43918	10.3079	11.9305	11.2845	10.1991	9.97015	10.8689	9.23559	10.6377	10.6931	10.7261	9.54184	10.462	10.9747	10.96	11.6872	11.3426	11.0666	8.50603	11.8106	10.592	11.8908	10.934	10.2866	10.4065	9.50252	10.2295
MIMAT0000085	6.61587	6.64715	6.1697	5.79074	7.47962	6.65711	6.58828	5.5079	6.41031	6.56208	5.9499	6.72695	6.76363	6.89622	5.9843	6.18962	6.21611	6.25821	6.11801	7.37578	6.2312	7.16547	6.6361	6.09628	6.89851	7.31738	5.3516	7.83911	7.29958	5.95992	6.50507	6.38646	6.20725	7.13637	7.66461	7.02147	6.82884	7.24931	6.62492	7.28399	5.2898	7.13508	6.84335	6.57589	6.59092	6.64232	6.90908	6.76646	6.69353
MIMAT0000086	13.2531	12.6172	14.3849	13.9834	12.8607	13.1449	13.6815	12.9219	13.6133	14.1112	12.3008	13.0313	14.772	13.744	14.1372	13.2809	12.9913	13.0594	13.9074	13.2726	13.4713	14.0209	12.1855	13.8673	13.863	13.6765	12.8732	14.1859	12.7345	12.5218	14.1953	14.1814	13.4656	13.8563	11.7096	14.7943	13.4084	14.2608	13.0898	13.1368	10.8207	14.0992	14.4811	13.397	14.083	13.9139	14.3599	11.7403	14.2028
MIMAT0000087	10.8843	11.5182	14.165	14.889	13.2249	16.2514	12.9384	10.6844	13.3531	14.6578	12.4001	15.19	15.0576	12.486	14.9815	11.8873	12.7338	14.3471	14.1673	12.9205	14.0327	13.4798	12.3205	13.9036	13.2754	13.5419	13.5172	12.7148	14.3402	15.4285	12.7598	14.809	13.3641	12.6234	12.7317	13.581	11.5374	14.396	12.3728	13.9711	11.5862	13.3661	13.679	12.658	12.7563	13.7506	12.9586	12.2837	10.8994
MIMAT0000080	10.8682	10.5557	10.9578	10.8777	10.5121	11.0001	11.3233	9.37153	10.9951	10.9916	9.20836	11.0146	11.08	11.5218	11.6054	10.4123	11.0562	10.7401	10.5758	11.4752	11.0473	11.0173	9.34674	11.096	11.9702	10.9714	10.2147	10.7572	10.8042	11.0275	11.259	11.1997	10.6359	10.9132	11.7556	10.7487	11.753	11.7795	11.6328	11.1693	9.26377	10.9015	11.3679	11.435	11.3025	10.3145	10.5547	9.40431	11.1487
MIMAT0000081	12.5473	11.519	12.855	14.5446	13.444	12.5271	12.7391	13.0199	11.9767	11.4399	14.0688	13.3653	13.3103	13.8379	13.3191	12.1413	13.5109	12.9814	12.5138	12.9445	12.7601	12.8643	12.946	12.5974	12.3503	12.922	12.1126	12.301	13.6979	11.6043	13.2681	13.1204	13.1831	12.7271	14.919	12.8123	12.5312	12.5457	12.869	14.3485	12.7799	12.529	12.712	12.7777	12.2688	12.5843	12.5579	12.7167	12.4575
MIMAT0000082	11.0371	10.9418	11.7649	11.7789	10.9563	11.751	11.4678	9.83767	10.9905	12.5847	10.7007	11.1516	11.7379	10.7914	11.7155	10.3723	10.5304	11.035	11.6721	12.6717	11.4936	11.5249	9.87147	11.3524	13.8946	11.5507	13.1135	10.5884	11.0216	11.9522	12.1777	12.3177	10.7492	11.0172	11.5189	12.0582	10.8007	11.558	11.0912	10.7385	9.43818	12.7578	12.155	11.5838	11.9893	13.3022	12.0574	11.6847	12.5695
MIMAT0000083	9.78178	8.27453	10.8269	8.66364	9.66096	9.97836	10.083	6.9248	9.25102	8.29341	8.45678	8.10384	9.65458	9.36455	8.69367	8.51956	9.53769	9.30964	10.0976	9.7795	10.2455	9.49909	8.05525	9.61289	11.1712	9.46056	9.3462	9.63212	9.3608	8.71	8.44073	9.35134	9.4864	9.73214	10.061	9.71542	7.71553	10.3417	10.1946	9.53104	7.23753	9.67689	10.4359	10.4861	8.30846	9.7169	8.6863	7.61401	8.55616
MIMAT0003240	NA	NA	NA	NA	NA	NA	NA	NA	NA	NA	NA	NA	NA	NA	NA	NA	NA	NA	NA	NA	NA	NA	NA	NA	NA	NA	NA	NA	NA	NA	NA	NA	NA	NA	NA	NA	NA	NA	NA	NA	NA	NA	NA	NA	NA	NA	NA	NA	NA
MIMAT0022275	NA	NA	NA	NA	NA	0.2677	NA	NA	NA	NA	NA	NA	NA	NA	NA	NA	NA	NA	NA	NA	NA	NA	NA	NA	NA	NA	NA	NA	NA	NA	NA	NA	NA	NA	0.2185	NA	NA	NA	NA	NA	NA	0.2065	NA	NA	NA	NA	NA	NA	NA
MIMAT0004505	0.633753	0.2916	1.32801	0.634082	1.73118	1.69731	0.4656	NA	1.06136	0.865439	0.654242	0.7187	0.876822	0.8106	NA	0.527672	1.4648	0.925476	0.649715	0.4534	1.24648	0.936517	0.874005	0.405938	0.342518	1.21874	1.22281	0.4456	1.14557	NA	1.02755	1.58231	1.1954	0.7137	1.64401	1.329	0.575236	1.40209	1.53005	1.70713	0.963949	1.15766	1.3105	1.13862	0.66723	0.566136	0.2032	0.669919	0.708964
MIMAT0004504	2.82116	NA	3.27572	0.634082	7.11637	0.2677	6.5389	NA	1.06127	0.865437	1.33919	3.65794	1.1341	3.67939	0.6202	1.02173	1.30268	1.59622	0.463872	1.19693	0.54351	2.28806	3.6619	NA	2.99401	4.91664	1.22286	7.20514	2.9765	0.146	0.333	0.5293	4.92356	NA	4.42197	0.959909	1.78638	7.26813	0.557813	5.8435	1.48854	2.92915	0.799137	5.19048	1.80687	2.09344	3.67782	1.61759	NA
MIMAT0004507	1.25032	0.291682	3.09629	1.2508	1.59935	1.0141	2.08322	4.82712	1.66621	1.51056	4.20189	1.38637	0.77984	2.25392	1.3848	1.21716	2.50946	1.23204	1.71172	0.2445	2.14781	2.35396	1.02915	1.56045	1.14134	1.21874	1.87507	2.51207	1.23088	0.511979	0.830979	0.7354	2.18514	2.01447	2.56181	1.43366	0.3161	2.24956	1.12427	3.86698	1.22083	0.69201	1.47312	1.58626	0.371899	1.16953	1.95375	1.0246	0.3976
MIMAT0004506	1.5512	1.36064	1.53008	1.07301	1.96348	1.9467	2.26574	NA	NA	1.15893	0.9681	NA	1.1341	0.81058	0.6202	1.02177	1.11997	0.7437	0.463872	1.98344	1.24647	1.71577	0.700015	0.405938	2.40255	2.15427	0.817533	NA	1.88526	0.512	1.42633	1.5823	0.4033	0.5656	2.78356	1.86652	0.3161	2.09957	1.84638	2.29643	0.251089	1.15773	1.31049	1.13864	0.667172	1.34357	1.89625	0.529306	0.708964
MIMAT0004501	2.1075	1.92598	3.62386	4.95776	2.6369	2.65581	3.56749	2.3527	1.9629	3.23639	3.04744	5.76215	3.31631	1.70569	4.18493	2.81466	3.29297	3.321	3.44097	2.93501	2.47915	3.30889	2.0435	5.72746	2.20709	3.66469	3.00924	4.77702	4.33127	3.5556	3.33442	4.80922	2.83345	3.6827	4.93504	2.8174	3.87944	5.21506	2.57426	3.78314	2.70337	2.56656	4.89315	3.4787	2.81282	4.13969	3.47684	2.55492	2.3577
MIMAT0004500	4.56166	4.66126	5.35843	4.15641	5.64413	4.39127	6.21202	4.86148	4.36205	4.32977	5.5515	3.92656	4.35589	3.67937	3.48611	3.86234	4.32692	4.22974	4.14457	5.92666	4.4475	6.29366	4.37684	4.48819	4.92325	5.86654	4.37992	4.6785	5.35318	1.49092	3.3157	2.60808	4.70904	4.40339	5.19535	5.1988	3.7007	5.6215	4.80226	5.7417	3.88594	4.55245	5.5782	4.26997	3.0361	5.53194	3.83896	4.19288	4.39179
MIMAT0004503	3.03045	2.54005	3.90413	1.2508	3.98092	2.70176	4.24047	NA	3.38122	2.79884	2.27056	3.01843	3.747	3.8399	1.88187	3.60741	3.99656	3.2881	3.60734	3.57227	3.49759	4.74503	3.40266	4.08067	3.98843	3.66465	4.00502	4.8692	3.92081	1.31683	1.79348	2.84901	3.95539	4.50854	1.4846	3.62546	1.88538	3.76093	3.70433	4.49962	2.45098	3.87722	3.64916	4.6687	1.74495	4.13175	2.75431	3.06838	2.35767
MIMAT0004502	11.8955	12.0112	11.357	11.1673	11.7824	12.0028	11.6983	13.5849	10.8315	11.3066	12.0115	12.7277	12.3374	13.0894	11.6333	10.9598	11.5416	11.724	11.2784	12.5683	11.3513	12.101	12.1585	11.2944	12.0015	12.5066	10.6356	12.8756	12.9465	10.3712	11.6312	11.3084	12.0533	11.7235	13.0691	12.1762	11.327	12.6242	11.8481	12.4247	10.4997	12.0278	12.098	11.6739	11.5234	11.4667	11.5109	12.2021	11.9519
MIMAT0029782	0.633753	NA	0.4622	0.870207	1.45417	0.2677	1.09941	4.0659	0.446	0.2696	1.95191	NA	NA	0.3234	NA	0.795746	NA	0.2926	NA	0.798033	0.54351	0.2969	0.873893	NA	0.342518	0.3397	NA	NA	0.1823	0.146	0.1761	0.2888	NA	0.2141	2.60126	0.462664	0.3161	1.97598	0.3057	0.693921	1.09805	0.38711	0.1992	0.341444	0.1979	0.1324	0.68257	NA	1.37107
MIMAT0004509	2.76376	2.59454	3.62388	4.36399	4.52607	2.45584	4.24042	4.33418	2.3176	1.95481	4.35804	3.86397	3.26345	5.77559	2.99684	2.93068	4.26218	3.55974	3.00289	4.58988	4.04941	4.36793	3.05067	3.2399	4.27467	3.60297	3.3431	3.32868	4.50399	0.712841	2.25236	1.68531	4.20286	3.33923	4.59783	2.96443	2.49932	3.57453	4.31312	5.57721	4.03559	3.71767	2.8215	3.78849	1.80686	3.3943	2.11352	3.80772	1.53807
MIMAT0004508	NA	NA	NA	NA	0.3674	NA	NA	NA	NA	NA	NA	NA	NA	NA	NA	NA	NA	NA	NA	0.2445	NA	0.2969	NA	NA	NA	NA	NA	NA	NA	NA	NA	NA	NA	NA	NA	NA	NA	NA	NA	0.2701	0.131	NA	NA	NA	NA	0.1324	NA	NA	NA
MIMAT0014979	1.40857	0.417953	NA	1.91055	0.3674	1.01399	0.651989	NA	0.786192	0.2696	NA	NA	0.563592	0.587415	NA	0.1981	0.3711	0.5357	0.2505	0.453506	0.937366	NA	0.502128	0.2172	0.619117	NA	0.4659	NA	0.344127	0.400007	0.1761	1.07595	0.7181	0.713796	1.39771	NA	0.575236	0.865101	NA	NA	0.560983	0.38711	0.3741	0.737824	0.667172	0.469271	0.682585	0.1988	0.708964
MIMAT0014978	NA	NA	NA	NA	NA	NA	NA	NA	NA	NA	NA	NA	NA	NA	NA	NA	NA	NA	0.2505	NA	NA	NA	0.5022	NA	NA	NA	0.2517	NA	NA	NA	NA	NA	NA	NA	NA	NA	0.3161	NA	NA	NA	NA	NA	0.1992	NA	NA	0.253664	NA	NA	NA
MIMAT0014977	NA	NA	NA	0.8701	0.3674	NA	NA	NA	NA	NA	NA	NA	NA	NA	NA	NA	NA	NA	NA	NA	NA	NA	NA	NA	NA	0.3397	NA	NA	NA	NA	0.4745	NA	NA	NA	0.2185	NA	0.3161	NA	NA	0.2701	NA	0.2065	NA	NA	NA	NA	NA	0.1988	0.3976
MIMAT0027451	NA	NA	NA	NA	NA	NA	0.2515	NA	0.446	NA	NA	NA	0.1628	NA	NA	NA	NA	NA	NA	NA	NA	0.2969	NA	NA	NA	NA	NA	NA	NA	NA	NA	NA	0.4033	NA	NA	NA	NA	NA	NA	NA	0.2511	NA	NA	NA	NA	NA	NA	NA	NA
MIMAT0003180	3.12468	3.21534	1.86519	3.58947	1.85204	1.86823	2.32175	3.30749	0.446	1.01966	1.22577	1.84113	1.41832	2.00571	NA	NA	2.84011	2.20074	2.96837	3.13019	2.69837	1.09923	1.41435	0.722349	2.60675	2.59556	1.22289	1.66505	1.59485	1.11873	2.63053	1.22016	1.55343	0.5656	2.25104	1.62264	2.06502	2.05954	1.74839	2.92399	1.16077	2.83894	1.12707	3.01374	1.30453	3.03703	0.812528	2.40194	1.53801
MIMAT0031095	NA	NA	NA	NA	NA	NA	NA	NA	NA	NA	NA	NA	NA	NA	NA	NA	NA	NA	NA	NA	NA	NA	NA	NA	NA	NA	NA	NA	NA	NA	NA	NA	NA	NA	NA	NA	NA	NA	NA	NA	NA	NA	NA	NA	NA	NA	NA	NA	NA
MIMAT0003340	0.869788	2.19659	1.32794	1.07301	1.59927	2.65578	1.62987	NA	1.82211	2.56839	0.819716	1.38642	1.9953	2.328	2.99685	0.527672	1.46472	1.79623	0.649715	2.74941	1.37938	1.98921	0.873893	0.981693	2.43862	2.93303	2.26651	2.20753	3.32565	0.889096	2.90512	0.529319	1.96445	1.95611	0.725945	1.86649	1.4408	1.12006	2.45519	2.23465	1.48857	1.50919	1.54812	2.60261	1.46669	1.68279	2.06225	2.65981	0.3976
MIMAT0018953	NA	NA	NA	NA	NA	NA	NA	NA	NA	NA	NA	NA	NA	NA	NA	NA	NA	NA	NA	NA	NA	0.2969	NA	NA	NA	NA	NA	NA	NA	NA	NA	NA	NA	NA	NA	NA	NA	NA	NA	NA	NA	NA	NA	NA	NA	NA	NA	NA	NA
MIMAT0018952	NA	NA	NA	NA	NA	NA	NA	NA	NA	NA	NA	NA	NA	NA	NA	NA	NA	NA	NA	NA	NA	NA	NA	NA	NA	NA	NA	NA	NA	NA	NA	NA	NA	NA	NA	NA	NA	NA	NA	NA	NA	NA	NA	NA	NA	NA	NA	NA	NA
MIMAT0018951	NA	0.1532	NA	NA	NA	NA	NA	NA	NA	NA	NA	NA	NA	NA	0.6202	0.1981	NA	NA	NA	NA	NA	NA	0.700015	0.4059	0.1814	NA	NA	NA	NA	NA	0.603371	NA	0.718139	0.2141	0.575758	NA	0.3161	NA	NA	NA	NA	NA	NA	0.1808	NA	NA	NA	0.1988	0.3976
MIMAT0018950	NA	0.1532	NA	NA	0.3674	NA	NA	NA	0.446	NA	0.2525	NA	NA	NA	NA	NA	NA	NA	NA	0.453506	NA	NA	NA	0.2172	NA	0.3397	NA	NA	NA	0.146	0.333024	0.2888	NA	NA	NA	NA	NA	0.3042	0.3057	NA	NA	0.2065	0.374203	NA	0.1979	0.253664	0.381281	0.1988	NA
MIMAT0018957	NA	NA	NA	NA	NA	NA	NA	NA	NA	NA	NA	NA	NA	NA	NA	NA	NA	NA	NA	NA	NA	NA	NA	NA	NA	NA	NA	NA	NA	NA	NA	NA	NA	NA	NA	NA	NA	NA	NA	NA	NA	NA	NA	NA	NA	NA	NA	NA	NA
MIMAT0018956	NA	NA	NA	NA	NA	NA	NA	NA	NA	NA	NA	NA	NA	NA	NA	NA	NA	NA	NA	NA	NA	NA	NA	NA	NA	NA	NA	NA	NA	NA	NA	NA	NA	NA	NA	NA	NA	NA	NA	NA	NA	NA	NA	NA	NA	NA	NA	NA	NA
MIMAT0019788	NA	NA	NA	NA	NA	NA	NA	NA	NA	NA	NA	NA	NA	NA	NA	0.1981	NA	NA	NA	NA	NA	NA	NA	NA	NA	NA	NA	NA	NA	NA	NA	NA	NA	NA	NA	NA	NA	NA	NA	NA	NA	NA	NA	NA	NA	NA	NA	NA	NA
MIMAT0030429	NA	0.291682	0.4622	0.3516	NA	NA	0.2515	0.7525	0.786192	NA	NA	1.70485	0.442	0.587415	NA	NA	0.910822	0.535746	NA	0.635936	NA	0.2969	0.2728	NA	0.3425	NA	NA	NA	NA	0.2786	NA	NA	0.976429	0.2141	NA	NA	NA	0.666145	NA	0.497518	0.816	NA	NA	0.3415	NA	NA	0.539793	NA	0.964912
MIMAT0030428	NA	NA	NA	NA	NA	NA	NA	NA	NA	NA	NA	NA	NA	NA	NA	NA	NA	NA	NA	NA	NA	NA	NA	NA	NA	NA	NA	NA	NA	NA	NA	NA	NA	NA	NA	NA	NA	NA	NA	NA	NA	NA	NA	NA	0.1979	NA	NA	NA	NA
MIMAT0004703	6.86831	3.72333	6.75806	7.29373	4.86446	6.47394	6.40913	2.97203	6.64248	5.01963	8.82916	6.49876	6.14042	7.1108	6.83716	5.42972	6.73626	6.16188	6.79416	4.76664	6.29142	6.77808	7.07968	6.76859	7.2656	5.96793	7.54987	7.73265	7.44943	6.80449	6.14382	7.12183	7.2195	8.56954	6.13583	5.54676	4.85424	5.50331	6.69883	8.52174	7.60746	6.08285	6.54256	6.48637	5.37232	7.34055	7.04583	6.95009	7.65961
MIMAT0027679	NA	NA	NA	NA	0.3674	NA	NA	NA	NA	NA	NA	NA	NA	NA	NA	NA	NA	0.2926	NA	0.2445	NA	NA	NA	NA	NA	NA	NA	NA	NA	NA	NA	NA	NA	NA	0.4081	NA	NA	NA	NA	NA	NA	NA	NA	NA	NA	NA	NA	NA	NA
MIMAT0026921	NA	0.291682	NA	NA	0.3674	NA	NA	NA	NA	NA	NA	NA	NA	0.81058	NA	0.1981	NA	NA	0.4639	0.4534	NA	NA	0.2728	NA	NA	0.3397	NA	NA	0.1823	NA	NA	NA	0.4033	NA	NA	NA	NA	NA	NA	NA	NA	NA	NA	NA	NA	NA	NA	NA	0.3976
MIMAT0023701	NA	NA	NA	NA	NA	NA	NA	NA	NA	NA	NA	NA	NA	NA	NA	NA	NA	NA	NA	NA	NA	NA	NA	NA	NA	NA	NA	NA	NA	NA	NA	NA	NA	NA	NA	NA	NA	NA	NA	NA	NA	NA	NA	NA	NA	NA	NA	NA	NA
MIMAT0019770	NA	NA	NA	NA	NA	NA	NA	NA	NA	NA	NA	NA	NA	NA	NA	NA	NA	NA	NA	NA	NA	NA	NA	NA	NA	NA	NA	0.4456	0.1823	NA	NA	NA	NA	NA	0.408219	NA	NA	NA	NA	NA	NA	NA	NA	NA	NA	NA	NA	NA	0.3976
MIMAT0019771	NA	NA	NA	NA	NA	NA	NA	NA	NA	NA	NA	NA	NA	NA	NA	NA	NA	NA	NA	NA	NA	NA	NA	NA	NA	NA	NA	NA	NA	NA	NA	NA	NA	NA	NA	NA	NA	NA	NA	NA	NA	NA	NA	NA	NA	NA	NA	NA	0.709
MIMAT0019772	NA	0.2916	0.8116	NA	0.6599	0.688622	0.817041	1.2445	0.446	0.865467	0.2525	0.977166	0.4419	1.17414	0.6202	0.1981	NA	0.2926	0.649739	1.07585	1.10019	0.936525	NA	0.2172	NA	0.8452	0.2517	NA	0.489685	NA	0.1761	0.529319	0.718139	NA	0.2185	NA	0.575236	1.12003	0.557813	0.2701	0.560983	NA	0.1992	0.341444	0.527064	0.469271	0.2032	0.669914	NA
MIMAT0019773	NA	NA	NA	NA	NA	NA	NA	NA	NA	NA	NA	NA	NA	0.3234	NA	NA	NA	NA	NA	NA	NA	NA	NA	NA	NA	NA	NA	NA	NA	NA	NA	NA	NA	NA	NA	NA	NA	NA	NA	NA	NA	NA	NA	NA	0.1979	0.1324	NA	NA	NA
MIMAT0019774	NA	NA	NA	NA	0.903037	NA	NA	1.2445	NA	NA	NA	NA	0.1628	0.3234	NA	0.1981	NA	NA	NA	NA	NA	0.543004	NA	NA	NA	NA	0.2517	NA	NA	NA	0.1761	NA	NA	NA	NA	0.2498	NA	NA	NA	NA	NA	NA	NA	NA	NA	0.1324	NA	NA	NA
MIMAT0019775	NA	0.1532	NA	NA	NA	NA	0.2515	NA	NA	NA	NA	NA	0.1628	NA	NA	NA	0.3711	NA	NA	NA	0.2972	NA	NA	NA	NA	0.3397	NA	NA	0.3442	NA	NA	NA	0.4033	NA	NA	0.2498	0.3161	NA	NA	NA	NA	0.2065	NA	0.1808	0.1979	0.2536	NA	0.1988	NA
MIMAT0019776	0.3514	1.42223	1.09275	1.40903	0.659972	0.688622	1.33544	2.84033	0.446	1.01957	0.4673	1.55439	0.77984	0.81058	1.3848	0.372254	0.6661	NA	0.649715	2.23054	0.753837	1.71578	0.700015	0.2172	0.619088	2.39171	0.4659	NA	1.1456	NA	0.603369	NA	0.4033	0.2141	1.48458	0.4626	0.3161	1.03999	0.3057	1.1606	0.464907	0.547595	1.02592	0.341444	0.794849	1.16951	0.381281	0.915758	NA
MIMAT0019777	NA	NA	NA	NA	0.3674	NA	NA	NA	NA	NA	NA	NA	NA	NA	NA	NA	NA	NA	NA	0.2445	NA	NA	NA	NA	NA	NA	NA	NA	NA	NA	NA	NA	NA	NA	NA	NA	NA	NA	NA	NA	NA	NA	NA	NA	NA	NA	NA	NA	NA
MIMAT0019778	NA	NA	NA	NA	NA	NA	NA	NA	NA	NA	NA	NA	NA	NA	NA	NA	NA	0.2926	NA	NA	NA	NA	NA	NA	NA	NA	NA	NA	NA	NA	NA	NA	NA	NA	NA	NA	NA	NA	NA	NA	NA	NA	NA	NA	NA	NA	NA	NA	NA
MIMAT0019779	NA	NA	NA	0.3516	NA	NA	0.2515	NA	NA	0.2696	0.2525	0.4037	NA	NA	NA	NA	NA	NA	NA	NA	NA	NA	NA	NA	NA	NA	NA	NA	NA	NA	0.1761	NA	NA	0.2141	NA	0.2498	NA	NA	NA	NA	0.131	NA	NA	NA	0.527064	0.253664	NA	0.373494	NA
MIMAT0027676	NA	NA	NA	NA	NA	NA	NA	NA	NA	NA	NA	NA	NA	NA	NA	NA	NA	NA	NA	NA	NA	NA	NA	NA	NA	0.3397	NA	NA	NA	NA	NA	NA	0.4033	NA	NA	NA	NA	NA	NA	NA	NA	NA	NA	NA	NA	NA	NA	NA	NA
MIMAT0007889	NA	0.2916	NA	NA	NA	NA	0.2515	NA	NA	0.2696	0.2525	0.4037	NA	0.587415	NA	0.1981	0.910822	NA	NA	0.943643	NA	NA	NA	NA	0.1814	NA	NA	NA	0.1823	NA	NA	NA	NA	NA	0.2185	NA	NA	NA	0.557813	NA	0.2511	NA	NA	NA	NA	NA	NA	0.373494	NA
MIMAT0007888	NA	NA	NA	NA	NA	NA	0.2515	NA	NA	NA	0.2525	NA	NA	0.3234	NA	0.1981	NA	NA	NA	0.2445	NA	NA	0.2728	NA	NA	NA	NA	NA	0.344127	NA	NA	0.2888	NA	NA	NA	NA	NA	NA	0.3057	NA	NA	NA	0.530255	0.3415	NA	0.1324	0.2032	NA	NA
MIMAT0027677	NA	NA	NA	NA	0.3674	0.2677	0.2515	NA	NA	NA	NA	NA	0.3091	NA	NA	NA	NA	NA	0.2505	0.2445	NA	NA	NA	0.4059	NA	NA	NA	NA	NA	NA	NA	0.2888	NA	0.4006	NA	NA	0.3161	0.5552	NA	0.694	NA	NA	0.5301	NA	NA	0.3655	NA	0.1988	NA
MIMAT0007881	NA	NA	NA	0.634	NA	NA	NA	NA	NA	NA	NA	0.4037	NA	NA	NA	NA	0.3711	0.2926	NA	NA	NA	NA	NA	NA	NA	NA	NA	NA	NA	NA	NA	NA	NA	NA	NA	NA	0.5752	NA	NA	0.4976	NA	NA	NA	NA	NA	NA	NA	0.1988	0.708964
MIMAT0007883	NA	NA	NA	NA	NA	NA	NA	0.7525	NA	NA	NA	NA	NA	NA	NA	NA	NA	NA	NA	NA	NA	NA	NA	NA	NA	NA	NA	NA	NA	NA	NA	NA	NA	NA	NA	NA	NA	NA	NA	NA	NA	NA	NA	NA	NA	0.3655	NA	NA	NA
MIMAT0007882	0.3514	NA	NA	NA	NA	NA	NA	NA	NA	NA	NA	NA	NA	NA	NA	NA	NA	NA	NA	NA	NA	NA	NA	NA	NA	NA	NA	NA	NA	NA	NA	NA	NA	NA	NA	NA	NA	NA	NA	0.2701	NA	0.2065	NA	NA	NA	NA	NA	NA	NA
MIMAT0007885	1.2503	0.291682	NA	0.3516	NA	1.0141	0.4656	NA	1.96289	NA	NA	NA	0.1628	NA	3.09083	NA	0.3711	NA	0.2505	0.2445	0.2972	2.06986	NA	0.2172	NA	NA	NA	NA	0.1823	0.4	0.1761	0.7354	0.7181	NA	12.1273	4.15577	0.3161	NA	NA	NA	0.251089	0.2065	1.6872	NA	0.1979	0.5661	0.2032	2.65985	NA
MIMAT0007884	NA	NA	NA	NA	0.3674	0.2677	1.62992	NA	0.446	NA	NA	NA	NA	NA	NA	NA	NA	0.2926	NA	0.2445	NA	NA	NA	NA	NA	NA	0.2517	NA	0.344127	NA	NA	NA	NA	NA	0.861913	NA	0.3161	NA	NA	NA	NA	NA	0.1992	NA	NA	0.1324	NA	NA	NA
MIMAT0007887	0.869743	NA	NA	NA	NA	NA	NA	NA	1.29223	NA	NA	NA	NA	NA	2.07817	NA	NA	NA	NA	NA	NA	NA	NA	NA	NA	NA	NA	NA	NA	NA	NA	0.2888	NA	NA	9.4027	NA	NA	NA	NA	NA	NA	NA	0.670923	NA	NA	0.1324	NA	NA	NA
MIMAT0007886	NA	NA	NA	NA	NA	NA	NA	NA	NA	NA	NA	NA	NA	NA	NA	NA	NA	NA	NA	NA	NA	NA	NA	NA	NA	NA	NA	NA	NA	NA	NA	NA	NA	NA	4.49698	NA	NA	NA	NA	NA	NA	NA	0.1992	NA	NA	NA	NA	NA	NA
MIMAT0030427	NA	NA	NA	NA	NA	NA	NA	NA	NA	NA	NA	NA	NA	NA	NA	NA	NA	NA	NA	NA	NA	NA	NA	NA	NA	NA	NA	NA	NA	NA	NA	NA	NA	NA	NA	NA	NA	NA	NA	NA	NA	NA	NA	NA	NA	NA	NA	NA	NA
MIMAT0030426	NA	NA	0.4622	NA	NA	NA	NA	NA	NA	NA	0.2525	NA	NA	NA	NA	NA	0.3711	NA	NA	NA	NA	NA	NA	NA	NA	NA	NA	NA	NA	NA	NA	NA	NA	NA	0.5757	NA	NA	NA	NA	NA	NA	NA	NA	NA	NA	NA	NA	NA	NA
MIMAT0007401	NA	NA	NA	NA	NA	NA	NA	NA	NA	NA	NA	NA	NA	NA	NA	NA	NA	NA	NA	NA	NA	NA	NA	NA	NA	NA	NA	NA	NA	NA	NA	NA	NA	NA	NA	NA	NA	NA	NA	NA	NA	NA	NA	NA	NA	NA	NA	NA	NA
MIMAT0007400	NA	0.64159	NA	0.3516	NA	NA	NA	NA	NA	0.2696	0.65426	0.977166	NA	0.3234	NA	0.1981	NA	NA	NA	0.453506	NA	1.37817	NA	NA	0.1814	NA	0.2517	NA	0.1823	NA	0.333024	0.2888	NA	0.2141	0.2185	NA	NA	0.304195	NA	0.2701	0.735851	NA	0.1992	0.1808	NA	NA	0.2032	NA	NA
MIMAT0019954	NA	0.291682	0.4622	1.55173	1.45422	0.493416	0.965116	1.61073	1.06136	1.15888	0.46732	0.4037	0.563592	0.81058	1.0526	0.527672	NA	0.5357	0.463872	0.635936	0.54351	NA	NA	0.572818	NA	0.3397	0.2517	NA	1.14564	0.615896	1.11661	0.915708	0.4033	1.08408	2.63963	0.812412	1.30435	0.4352	1.12435	0.2701	NA	0.547604	0.1992	0.1808	0.527153	0.1324	1.23956	0.529301	0.964942
MIMAT0019955	NA	0.1532	0.4622	0.634082	0.903098	NA	NA	NA	0.446	0.2696	0.2525	NA	0.1628	NA	NA	NA	NA	0.5357	0.2505	NA	NA	NA	0.2728	NA	NA	NA	NA	NA	0.344127	0.146	0.474542	NA	NA	0.2141	0.4081	NA	1.44076	NA	0.557813	NA	0.131	NA	0.3741	0.3415	NA	0.3655	NA	0.1988	NA
MIMAT0019956	NA	NA	NA	NA	NA	NA	NA	0.7525	NA	NA	NA	NA	NA	NA	NA	NA	NA	NA	NA	NA	NA	NA	NA	NA	NA	NA	NA	NA	NA	NA	NA	NA	NA	NA	NA	NA	NA	NA	NA	NA	NA	NA	NA	NA	NA	NA	NA	0.1988	NA
MIMAT0019957	NA	0.2916	NA	1.55171	NA	0.2677	0.2515	1.9025	0.7863	0.865467	0.2525	1.19623	0.1628	0.3234	NA	0.527672	0.3711	0.535746	0.2505	1.68522	1.61302	1.24538	0.2728	0.405938	0.954432	1.86983	0.465942	0.78556	0.854577	NA	0.721695	0.529319	NA	0.848045	1.71758	0.959898	NA	NA	2.02423	0.2701	1.62825	0.69201	NA	1.37975	NA	0.656757	0.2032	NA	NA
MIMAT0019950	NA	NA	NA	0.3516	NA	NA	NA	NA	NA	NA	0.4673	NA	NA	NA	NA	NA	NA	NA	NA	NA	NA	NA	NA	NA	NA	0.3397	NA	NA	NA	NA	NA	NA	NA	NA	NA	NA	NA	NA	NA	NA	NA	NA	NA	NA	NA	NA	0.2032	NA	NA
MIMAT0019951	NA	NA	NA	NA	NA	NA	NA	NA	NA	NA	NA	NA	NA	NA	NA	NA	NA	NA	NA	NA	NA	NA	NA	NA	NA	NA	NA	NA	NA	NA	NA	NA	NA	NA	NA	0.2498	NA	NA	NA	NA	NA	NA	NA	NA	NA	NA	NA	NA	NA
MIMAT0019952	NA	NA	NA	NA	NA	NA	NA	NA	NA	NA	NA	NA	NA	NA	NA	NA	NA	NA	NA	NA	NA	NA	NA	NA	NA	NA	NA	NA	NA	NA	NA	NA	NA	NA	NA	NA	NA	NA	NA	NA	NA	NA	0.1992	NA	NA	NA	NA	NA	NA
MIMAT0019953	NA	NA	NA	NA	NA	NA	NA	NA	NA	NA	NA	NA	NA	NA	NA	NA	NA	NA	NA	NA	NA	NA	NA	NA	NA	NA	NA	NA	NA	NA	NA	NA	NA	NA	NA	NA	NA	NA	NA	NA	NA	NA	NA	NA	NA	NA	NA	NA	NA
MIMAT0019958	NA	0.291682	0.4622	4.28453	NA	NA	NA	NA	NA	0.2696	0.8197	NA	0.1628	0.810507	NA	NA	5.13054	NA	0.2505	1.30868	0.753915	1.37812	0.2728	NA	NA	0.3397	0.4659	1.66507	NA	NA	0.603409	NA	0.4033	1.37856	0.72585	0.648065	1.15365	0.1601	0.3057	NA	1.33398	0.38711	NA	0.3415	0.371899	3.1031	1.32914	0.67	1.1823
MIMAT0019959	NA	NA	NA	NA	NA	NA	NA	NA	NA	NA	NA	NA	NA	NA	NA	NA	NA	NA	NA	NA	NA	NA	NA	NA	NA	NA	NA	NA	NA	NA	NA	NA	NA	NA	NA	NA	NA	NA	NA	NA	NA	NA	NA	NA	NA	NA	NA	NA	NA
MIMAT0000436	1.4085	1.08416	3.62387	4.17858	2.06698	4.16391	3.13888	1.24453	1.49137	1.4026	3.04744	2.28524	4.06797	2.32798	1.05254	3.11352	1.74282	2.77519	3.33656	3.43116	5.99806	2.28803	1.80653	5.66883	2.07568	3.28705	2.52719	3.56759	4.34092	4.03956	2.40161	6.22485	4.45702	3.09097	2.56188	4.73922	2.78216	4.14272	1.27265	1.28771	1.16073	4.20071	2.36306	2.24447	5.18686	4.13179	4.15289	2.5182	0.708964
MIMAT0005800	1.25037	NA	NA	NA	0.3674	0.2677	0.2515	NA	1.49131	NA	NA	NA	NA	NA	1.88187	NA	NA	NA	NA	NA	NA	NA	NA	NA	0.3425	NA	NA	NA	NA	0.146	NA	NA	0.718139	NA	10.5626	NA	NA	NA	NA	NA	NA	NA	0.917003	NA	0.1979	NA	NA	NA	NA
MIMAT0019009	NA	NA	2.46762	NA	NA	NA	NA	NA	NA	NA	NA	NA	NA	NA	NA	NA	NA	NA	NA	NA	1.2465	NA	NA	NA	NA	NA	NA	NA	NA	NA	NA	NA	NA	NA	NA	NA	NA	NA	NA	NA	NA	NA	NA	NA	NA	NA	NA	NA	NA
MIMAT0005936	0.3514	NA	NA	NA	0.3674	NA	0.465597	NA	0.446	NA	NA	NA	NA	NA	NA	0.1981	0.3711	0.2926	NA	NA	NA	NA	NA	NA	NA	0.3397	NA	NA	NA	NA	NA	0.2888	NA	NA	NA	NA	0.3161	NA	NA	0.2701	NA	NA	NA	0.1808	NA	NA	NA	NA	NA
MIMAT0005933	1.25032	0.64159	1.70732	0.634082	1.73114	1.01405	0.965088	NA	1.06136	NA	0.654242	NA	0.6758	1.17414	NA	1.38921	0.910822	0.535746	1.21871	1.5092	NA	1.90367	1.02911	0.9816	1.58963	1.21874	0.8175	3.22083	1.65783	NA	0.1761	0.2888	0.976396	1.7656	1.30531	1.32899	0.3161	1.69136	1.12432	2.84352	1.58317	1.65733	1.02585	1.30375	0.1979	2.18776	0.2032	1.5464	NA
MIMAT0005930	NA	0.4179	0.4622	0.870137	0.3674	NA	0.2515	NA	NA	0.2696	1.63397	0.4037	0.1628	0.81058	NA	0.1981	0.3711	0.2926	NA	0.2445	0.2972	NA	0.8739	NA	0.1814	NA	NA	NA	0.621834	NA	0.47452	0.2888	0.4033	0.2141	0.725945	NA	0.3161	NA	1.27265	NA	1.1608	NA	NA	0.1808	NA	NA	0.539793	0.1988	1.68765
MIMAT0028215	NA	0.291682	NA	0.3516	NA	NA	NA	NA	NA	NA	0.2525	NA	NA	NA	NA	NA	NA	NA	NA	0.2445	NA	NA	NA	NA	NA	NA	NA	NA	0.1823	0.146	0.333024	NA	NA	NA	NA	NA	NA	0.304195	NA	NA	0.131	0.3871	NA	0.1808	0.1979	0.253664	NA	0.1988	NA
MIMAT0028214	NA	NA	NA	NA	NA	0.2677	NA	NA	NA	NA	NA	0.718783	0.1628	NA	NA	NA	NA	NA	NA	NA	NA	NA	NA	0.2172	NA	NA	NA	NA	0.1823	NA	NA	NA	NA	NA	NA	0.462664	NA	0.4351	NA	NA	0.131	0.2065	0.1992	NA	NA	NA	0.2032	NA	NA
MIMAT0028213	NA	NA	NA	NA	NA	NA	NA	NA	NA	NA	NA	NA	NA	NA	NA	NA	NA	NA	NA	NA	NA	NA	NA	NA	NA	NA	NA	NA	NA	NA	NA	NA	NA	NA	NA	NA	NA	NA	NA	NA	0.560983	NA	NA	0.1808	NA	NA	NA	NA	NA
MIMAT0028212	NA	NA	NA	NA	NA	NA	NA	NA	NA	NA	NA	NA	0.1628	NA	NA	0.1981	NA	0.2926	NA	NA	NA	NA	NA	NA	0.1814	NA	NA	NA	NA	NA	NA	NA	NA	NA	NA	NA	NA	NA	NA	NA	0.651099	NA	NA	NA	NA	0.365521	NA	NA	NA
MIMAT0005939	0.3514	NA	NA	NA	0.3674	NA	NA	NA	NA	NA	NA	NA	NA	NA	NA	NA	NA	NA	NA	NA	NA	NA	NA	NA	NA	NA	NA	NA	NA	NA	NA	NA	NA	NA	NA	NA	NA	NA	NA	NA	NA	NA	NA	NA	NA	NA	NA	NA	NA
MIMAT0021030	NA	NA	NA	NA	NA	NA	NA	NA	NA	NA	NA	NA	NA	NA	NA	NA	NA	NA	NA	0.2445	NA	NA	NA	NA	NA	NA	NA	NA	NA	NA	NA	NA	NA	NA	0.86192	NA	NA	NA	NA	0.693993	NA	NA	NA	NA	NA	NA	NA	NA	NA
MIMAT0021033	NA	NA	NA	NA	NA	NA	0.2515	NA	NA	NA	NA	NA	NA	NA	NA	NA	NA	NA	NA	NA	NA	NA	NA	NA	NA	NA	NA	NA	NA	NA	NA	NA	NA	NA	NA	NA	NA	NA	NA	NA	NA	NA	NA	NA	NA	NA	NA	NA	NA
MIMAT0021034	NA	NA	NA	NA	NA	NA	NA	0.7525	NA	NA	NA	NA	NA	NA	NA	NA	NA	NA	0.2505	NA	NA	0.2969	NA	NA	NA	NA	0.2517	NA	NA	NA	NA	0.2888	NA	0.4006	NA	0.2498	NA	0.3042	NA	NA	NA	0.2065	NA	NA	0.1979	NA	NA	NA	NA
MIMAT0021035	NA	NA	NA	NA	NA	NA	NA	NA	NA	NA	NA	NA	NA	NA	NA	NA	NA	NA	NA	NA	NA	NA	NA	NA	NA	NA	NA	NA	NA	NA	NA	NA	NA	NA	NA	NA	NA	NA	NA	NA	NA	NA	NA	NA	NA	NA	NA	NA	NA
MIMAT0021037	NA	0.1532	NA	NA	NA	NA	NA	NA	NA	NA	NA	NA	NA	NA	NA	NA	NA	NA	NA	NA	NA	NA	NA	NA	NA	NA	NA	NA	NA	NA	NA	NA	NA	NA	NA	NA	NA	NA	NA	NA	NA	NA	NA	NA	NA	NA	NA	NA	NA
MIMAT0021039	NA	NA	NA	0.3516	NA	NA	NA	NA	NA	NA	NA	NA	NA	NA	NA	NA	NA	NA	NA	NA	0.2972	NA	NA	NA	NA	0.6145	0.2517	NA	NA	NA	NA	NA	NA	NA	NA	NA	NA	NA	NA	NA	NA	0.2065	NA	NA	NA	NA	NA	NA	0.3976
MIMAT0000276	0.3514	0.1532	1.86526	NA	NA	2.09178	1.09942	NA	0.446	0.496664	0.819716	0.977166	0.967747	0.587415	1.05254	1.12276	1.86408	1.23206	0.6497	0.943547	1.50086	0.7531	1.52281	0.8578	0.9545	1.64339	1.53893	0.7856	1.05499	NA	0.333024	0.529319	0.718139	0.5656	1.85428	0.462664	0.3161	0.95519	1.40701	1.28771	0.815951	0.943517	0.1992	0.737799	NA	0.365462	0.68257	0.1988	0.964942
MIMAT0000275	5.27736	4.42595	6.16212	6.12895	5.05268	7.40461	5.37725	0.7525	4.65952	5.28586	4.42382	5.59871	7.07109	5.75563	6.10179	3.13788	4.93692	5.26857	4.94347	6.35545	5.41406	4.58944	5.76262	5.61245	6.53359	5.75038	5.18777	6.1829	6.02516	6.39011	4.92917	6.69491	5.80286	5.13271	5.89943	5.80268	4.58648	5.89335	5.31109	8.22285	3.99314	6.09909	5.50009	4.98075	5.54581	5.96154	5.26714	4.23879	3.47962
MIMAT0000274	4.17789	3.16216	6.50572	2.36149	3.55213	5.96301	4.41801	NA	3.33018	5.95001	7.63477	4.07212	4.24208	4.60719	3.48617	1.74643	4.48643	6.31231	4.46256	4.7957	4.35374	2.41703	3.8402	6.59999	5.70544	4.25194	2.4787	3.32867	4.75492	3.0244	4.39168	1.9564	3.76316	3.03572	3.9282	4.3421	2.8814	3.8575	3.98791	2.35569	10.2653	3.86203	3.92695	2.50414	3.11159	3.89138	2.87823	3.4849	3.67146
MIMAT0000273	NA	0.291682	1.86521	0.3516	NA	1.3958	0.651991	0.7525	NA	1.15885	1.2257	0.4037	0.779779	1.00376	NA	0.1981	0.6661	1.59617	0.4639	0.2445	0.9374	NA	0.700015	1.56045	0.954491	NA	NA	1.0605	0.489685	0.616	0.932613	0.7354	0.4033	NA	0.5757	0.812412	0.794806	NA	NA	NA	4.59658	0.38711	1.1271	0.1808	0.3718	0.469306	0.3813	0.5294	0.964942
MIMAT0000272	6.36383	3.33224	5.55664	1.4091	1.111	2.34433	2.14661	5.32287	2.60221	2.41005	8.03787	4.52066	0.675744	1.59	1.05254	1.92483	1.11999	2.20076	2.14182	2.04937	1.9906	2.59122	6.4867	1.20143	1.38279	2.93302	1.63065	2.6844	1.83171	1.59636	1.89766	2.65961	4.63609	1.54602	2.85045	2.199	1.88539	9.5029	1.74838	1.87845	2.45097	2.13267	1.22175	1.97724	2.31283	2.85736	2.16314	2.48048	5.21635
MIMAT0000271	3.12469	2.67266	2.89126	1.07301	3.27799	2.60834	3.49622	4.47412	1.06127	2.92126	0.654242	2.37775	2.37347	3.73488	3.26211	0.1981	3.15723	3.07372	3.00291	4.1085	3.94609	2.41708	0.700015	2.24378	4.44407	3.28705	1.44113	1.96164	2.2546	2.50759	3.04781	2.0365	2.46342	2.1244	3.79861	4.04445	3.18324	3.0283	3.21092	1.95706	1.27852	4.61723	2.08975	4.17717	3.45886	1.68278	2.21105	0.798032	2.06122
MIMAT0000270	7.88919	9.0409	7.63011	8.43776	9.2859	8.95749	9.30712	5.8015	7.71452	8.72957	7.47183	9.1594	8.89466	7.28595	8.57071	7.12749	8.59319	8.01616	8.21703	8.86977	8.24641	9.18818	7.79627	7.79608	8.49692	8.72767	8.14496	7.75698	8.86057	7.13916	9.57112	7.63261	9.59932	8.26562	7.40562	8.74472	8.03002	7.66085	8.89634	9.44588	7.78212	9.38815	7.25896	8.6892	8.40986	9.16635	9.75823	8.29379	7.30455
MIMAT0000279	5.63851	6.52793	5.08113	5.06868	6.15342	6.64247	6.44114	6.25384	4.6801	8.13056	6.55374	7.27015	6.17897	6.12119	6.33083	6.16313	5.3847	6.04881	6.33342	6.68033	6.81562	7.61716	5.97331	5.92171	7.2917	6.82738	6.5161	9.67679	7.21968	4.936	5.44121	6.3711	6.47648	5.56206	6.0636	7.21929	5.57852	7.70697	5.92369	6.32324	3.96709	7.69055	5.17319	7.39718	5.29882	5.66084	5.86597	7.81672	4.34753
MIMAT0000278	7.13778	8.51658	6.54708	7.84217	8.06659	8.65074	7.88154	7.2829	6.62673	10.4541	8.21733	9.2879	8.63855	7.61486	8.63446	7.23146	6.67957	7.56709	7.9279	8.43588	7.87677	8.93368	7.65737	7.21751	8.6578	8.49692	7.60459	11.0522	9.0147	7.79317	8.03797	8.73035	7.86748	7.6796	7.70928	9.38553	8.19949	9.08366	7.16758	7.76024	5.55776	9.55263	7.04113	9.04806	8.36809	7.61755	8.66495	9.49871	7.60183
MIMAT0002815	NA	0.291682	NA	NA	NA	NA	NA	NA	NA	NA	NA	NA	0.1628	NA	NA	NA	NA	NA	NA	NA	NA	NA	NA	NA	NA	NA	NA	NA	NA	NA	0.1761	NA	NA	NA	NA	NA	NA	NA	NA	NA	NA	NA	0.3741	NA	NA	NA	NA	NA	NA
MIMAT0002814	2.87637	3.46989	2.36559	4.36396	2.70267	1.60368	2.26573	4.12369	1.29221	0.496664	2.15138	2.62428	0.675642	2.59126	2.2509	NA	3.20388	3.03469	3.3897	3.74112	2.64661	1.09917	2.24699	2.55421	2.99402	1.7611	1.22289	2.83835	2.25459	0.969791	2.68977	0.915699	1.84002	1.46468	1.39769	2.00882	2.78218	2.2847	2.73632	3.69411	1.94555	2.0277	1.5481	2.88928	2.39586	3.60269	1.49316	3.38643	1.68767
MIMAT0002817	2.87641	4.03066	1.86519	3.80416	1.96344	2.15916	2.37569	0.7525	0.446	1.01963	2.32655	0.4037	1.70937	1.46417	1.65464	0.1981	2.65093	2.62555	3.58473	3.45565	2.41865	1.37807	1.41435	1.97234	3.25924	2.23784	0.652407	2.76345	2.40896	1.2538	2.43662	0.735394	2.28397	0.970899	2.39248	2.8928	2.22477	2.67764	1.93804	3.23921	1.03254	2.23054	1.93071	2.75308	1.61256	3.28477	1.32915	2.69314	1.53805
MIMAT0002816	1.90992	0.417953	0.4622	0.870207	0.659972	NA	1.22227	1.2445	NA	NA	0.2525	0.7187	NA	1.59004	NA	NA	0.910822	0.743723	0.649739	0.635936	0.5436	NA	0.502128	0.85781	1.22641	1.21881	0.2517	NA	0.4897	0.4	0.830933	NA	0.976429	0.713711	1.39773	1.09361	NA	1.03991	1.40708	1.51261	NA	1.34411	0.799193	1.76694	0.1979	0.822871	0.3813	0.3735	NA
MIMAT0002811	NA	NA	NA	NA	NA	NA	NA	NA	NA	NA	NA	0.4037	NA	NA	NA	NA	NA	NA	0.2505	NA	NA	NA	NA	NA	NA	NA	NA	NA	NA	0.88912	NA	0.2888	NA	NA	NA	NA	NA	NA	NA	NA	NA	NA	NA	NA	0.1979	NA	NA	NA	NA
MIMAT0002810	NA	0.1532	0.8116	NA	0.6599	1.69739	0.2515	NA	NA	NA	0.6542	0.4037	0.1628	NA	NA	NA	0.3711	1.08689	0.814349	0.2445	0.54351	NA	NA	0.722349	0.487436	NA	0.2517	NA	0.489685	0.4	0.333	NA	NA	0.400494	0.725945	0.2498	0.3161	0.1601	0.5577	0.2701	0.2511	0.2065	0.5301	0.48603	NA	0.253664	0.2032	NA	NA
MIMAT0002813	3.48598	3.45523	2.36557	3.88717	2.93925	2.15924	2.9738	3.5795	1.66613	1.28588	1.10262	2.0802	1.9954	1.46423	1.65464	0.527672	3.20392	2.45859	3.62961	3.81867	2.84339	0.936525	2.11457	1.71122	3.56714	2.82908	1.63056	2.60079	2.51481	1.25381	3.23845	0.735394	2.89726	2.01444	3.2727	2.19896	2.88145	2.50941	2.92742	3.671	2.347	2.63964	2.13898	3.81611	2.43557	3.313	1.14408	3.34506	1.53807
MIMAT0002812	NA	NA	NA	NA	NA	NA	NA	NA	NA	NA	NA	0.4037	0.1628	NA	NA	NA	NA	NA	NA	NA	NA	NA	NA	NA	NA	NA	NA	NA	NA	NA	NA	NA	NA	NA	NA	NA	NA	0.1601	NA	NA	NA	NA	NA	NA	NA	NA	NA	NA	NA
MIMAT0002819	5.76828	5.80715	7.46112	5.29844	7.41249	5.18106	9.03697	7.27022	7.35462	4.49665	5.69156	5.87754	4.65853	6.35618	6.56162	6.58868	6.67127	5.68898	6.09812	7.83838	6.89821	7.88732	5.27344	3.79009	6.48262	6.8965	5.29668	6.33295	6.05468	2.39519	5.0472	3.30221	8.31885	6.15152	6.22368	5.68042	6.56337	6.28073	6.5286	7.35469	6.69708	7.32568	5.98786	6.67723	4.99403	5.94587	4.70641	5.9719	5.51557
MIMAT0002818	1.40861	1.92609	0.811703	2.93029	0.659972	0.4935	1.79733	0.7525	0.7863	0.2696	0.2525	NA	0.563592	1.0038	0.6202	NA	1.46479	1.88672	1.86976	1.68522	1.24653	0.543004	1.0291	1.09574	1.14128	1.04403	0.652407	0.7856	1.05491	0.803668	1.94705	0.2888	0.4033	0.2141	0.986127	0.648065	1.56544	0.769092	1.40703	1.16053	1.33395	1.50921	0.91707	1.92749	1.12174	1.39716	0.68257	0.669914	0.3976
MIMAT0027469	NA	NA	NA	NA	NA	NA	NA	NA	NA	NA	NA	NA	NA	NA	NA	NA	NA	NA	NA	0.2445	NA	NA	NA	NA	NA	NA	NA	NA	NA	NA	NA	NA	NA	NA	NA	NA	NA	NA	NA	0.4976	NA	NA	0.1992	NA	NA	NA	NA	NA	NA
MIMAT0027468	NA	NA	NA	NA	NA	NA	NA	0.7525	NA	NA	NA	NA	NA	NA	NA	NA	NA	NA	NA	NA	NA	NA	NA	NA	NA	NA	NA	NA	NA	NA	NA	NA	NA	NA	NA	NA	NA	NA	NA	NA	NA	NA	NA	NA	NA	NA	NA	NA	NA
MIMAT0027465	NA	NA	NA	NA	NA	NA	NA	NA	NA	NA	0.2525	NA	NA	0.3234	NA	NA	NA	NA	NA	NA	NA	NA	NA	NA	NA	NA	NA	NA	NA	NA	NA	NA	NA	NA	0.408219	NA	NA	NA	NA	NA	NA	NA	NA	NA	0.1979	NA	NA	NA	NA
MIMAT0027464	NA	NA	NA	NA	NA	NA	NA	NA	NA	NA	NA	NA	NA	NA	NA	NA	NA	NA	NA	NA	NA	NA	NA	NA	NA	NA	NA	NA	NA	NA	NA	NA	NA	NA	NA	NA	NA	NA	NA	NA	NA	NA	NA	NA	NA	NA	NA	NA	NA
MIMAT0027467	NA	NA	0.4622	0.3516	0.6599	NA	0.2515	1.2445	NA	NA	0.9681	0.4037	NA	0.8106	NA	0.3723	0.6661	NA	NA	0.2445	0.5436	0.9365	0.5022	NA	NA	0.845206	NA	0.4456	1.23092	NA	NA	0.2888	0.7181	NA	0.8619	0.2498	NA	0.3042	0.3057	1.02121	1.98073	0.2065	0.3741	0.3415	NA	0.469216	NA	0.7981	NA
MIMAT0027466	NA	0.1532	NA	NA	0.659972	NA	NA	NA	NA	NA	NA	NA	0.1628	NA	NA	NA	NA	NA	NA	0.2445	0.2972	NA	NA	NA	0.1814	NA	NA	NA	NA	NA	NA	NA	NA	NA	NA	0.4626	0.3161	NA	NA	NA	NA	NA	NA	NA	NA	NA	NA	NA	NA
MIMAT0027461	NA	NA	NA	NA	NA	NA	NA	0.7525	NA	NA	NA	NA	0.1628	NA	NA	NA	NA	NA	NA	NA	NA	NA	NA	NA	NA	NA	NA	NA	NA	NA	NA	NA	NA	NA	NA	NA	NA	NA	NA	NA	NA	NA	NA	NA	NA	NA	NA	NA	NA
MIMAT0027460	NA	NA	NA	NA	NA	NA	NA	NA	NA	NA	NA	NA	NA	NA	NA	NA	NA	NA	NA	NA	NA	NA	NA	NA	NA	NA	NA	NA	0.1823	NA	NA	NA	NA	NA	NA	NA	NA	NA	NA	NA	NA	NA	NA	NA	NA	NA	NA	NA	NA
MIMAT0027463	NA	0.1532	0.4622	NA	0.3674	0.2677	0.465597	NA	0.786192	NA	NA	NA	0.44188	0.3234	NA	1.02178	0.3711	0.2926	NA	0.943591	1.1002	0.5429	NA	0.2172	0.739751	0.3397	0.2517	NA	0.3442	NA	0.1761	NA	NA	NA	0.986127	NA	0.3161	0.666063	NA	0.4976	0.464897	NA	NA	0.1808	0.1979	NA	0.2032	NA	NA
MIMAT0027462	NA	NA	NA	NA	0.3674	NA	NA	NA	NA	NA	NA	NA	NA	NA	NA	NA	NA	NA	NA	NA	NA	NA	NA	NA	NA	NA	NA	NA	NA	NA	NA	NA	NA	NA	NA	NA	NA	NA	NA	NA	0.131	NA	NA	NA	NA	NA	NA	NA	NA
MIMAT0027645	NA	NA	NA	NA	NA	NA	NA	NA	NA	NA	NA	NA	NA	NA	NA	NA	NA	NA	NA	NA	NA	NA	NA	NA	NA	NA	NA	NA	NA	NA	NA	NA	NA	NA	NA	NA	NA	NA	0.3057	NA	NA	NA	NA	NA	NA	NA	NA	NA	0.3976
MIMAT0027644	NA	NA	NA	NA	NA	NA	NA	NA	NA	NA	NA	NA	NA	NA	NA	NA	NA	NA	NA	NA	NA	NA	NA	NA	NA	NA	NA	NA	NA	NA	NA	NA	NA	NA	NA	NA	NA	NA	NA	NA	NA	NA	NA	NA	NA	NA	NA	NA	NA
MIMAT0027647	NA	NA	NA	NA	NA	NA	NA	NA	NA	0.2696	0.2525	NA	0.309078	0.3234	NA	NA	NA	NA	NA	NA	NA	NA	NA	NA	NA	0.845206	0.2517	NA	NA	NA	0.1761	NA	NA	NA	NA	NA	NA	NA	NA	NA	NA	NA	NA	0.1808	NA	NA	NA	NA	NA
MIMAT0027646	NA	NA	NA	NA	NA	NA	NA	NA	NA	NA	NA	NA	NA	NA	NA	NA	NA	NA	NA	NA	NA	NA	NA	NA	NA	NA	NA	NA	NA	NA	NA	NA	NA	NA	0.2185	NA	NA	NA	NA	NA	NA	NA	NA	NA	NA	NA	NA	NA	NA
MIMAT0000417	7.3672	5.96288	7.6841	7.94591	9.23957	7.95274	7.72801	10.5063	6.99777	7.52095	8.01887	7.27913	8.49446	8.76579	8.77905	7.74855	6.42262	7.74849	8.43669	7.0951	8.60704	8.33799	6.50004	8.21658	8.00585	7.25106	7.14422	8.22491	8.08202	7.05151	8.24965	8.30433	8.31741	7.0131	9.17477	7.5844	7.13567	8.08789	8.20586	7.86205	7.26899	7.40376	7.91345	7.34602	7.74139	7.83657	7.50214	6.07356	8.36251
MIMAT0000416	1.90992	1.79241	4.19923	2.82186	2.06696	6.28314	2.78734	1.24453	4.28367	3.41375	0.9681	4.12642	4.99757	1.70565	2.4052	0.913218	2.07966	6.11584	3.13334	2.74937	3.4072	1.24536	1.0292	3.33586	3.84779	2.77415	2.70637	2.83833	2.64478	6.51797	2.7467	4.73912	2.5454	3.73561	3.81546	4.70828	3.01855	3.29298	2.63031	2.88432	1.43883	4.17632	3.56138	2.11703	3.58789	3.21183	3.58988	1.98375	1.37107
MIMAT0000415	8.97032	8.06246	8.44767	8.74567	8.37709	8.52302	9.36574	8.17953	8.80989	10.029	7.81098	9.53581	8.74924	8.46391	9.16924	8.94156	8.4934	8.7579	8.85813	9.17686	8.93434	9.04455	9.20331	8.65779	9.65001	9.3932	7.96847	9.63474	8.62984	8.20765	8.57497	8.97868	8.37034	10.0105	9.60398	8.83525	8.50592	10.4885	8.57155	8.54339	7.98735	8.34045	8.77367	8.89295	8.8489	9.46088	8.54856	9.85786	9.2261
MIMAT0027642	NA	NA	NA	NA	0.903037	NA	NA	NA	NA	NA	NA	NA	NA	NA	NA	NA	NA	NA	NA	NA	NA	NA	NA	0.2172	NA	NA	NA	0.4456	NA	NA	NA	NA	NA	NA	NA	NA	NA	NA	0.3057	NA	0.131	NA	NA	NA	0.1979	NA	0.2032	NA	NA
MIMAT0000419	11.1729	11.4505	10.8421	10.0002	10.3564	11.1836	11.7024	10.1156	9.92257	11.432	8.5888	10.3559	11.5845	11.8513	10.5379	10.0574	11.5789	11.0964	10.7791	11.6621	11.0547	10.8423	9.50969	10.7602	12.4466	10.6055	10.6411	8.05272	10.8977	9.8532	11.2888	10.2364	11.1101	10.8142	12.2839	10.6874	10.8045	11.2197	12.0775	10.2281	9.44568	11.5183	11.3442	12.2239	10.8264	10.7122	10.8341	8.9895	10.7824
MIMAT0000418	10.0506	11.0844	9.53644	9.43855	9.64376	10.6193	11.0392	10.5655	10.1745	11.096	8.84783	11.0452	10.8863	11.4973	10.7046	9.3224	10.8371	10.4074	9.51865	11.0328	9.88094	10.9859	9.24795	10.4167	11.1071	10.0379	9.93523	8.1423	10.1912	10.015	10.5136	9.71044	10.2114	10.4273	11.0191	9.82558	10.3853	10.6459	10.9812	9.69952	9.43519	10.1945	11.1152	10.7934	10.1348	10.2476	10.342	9.20639	10.9293
MIMAT0027649	NA	0.2916	0.811703	NA	NA	0.2677	0.2515	NA	NA	0.2696	NA	0.4037	0.563592	1.17412	NA	0.5277	NA	0.5357	NA	0.63603	0.5436	0.2969	NA	0.4059	0.4874	0.845206	0.2517	NA	0.1823	0.146	0.333	NA	NA	NA	0.2185	0.2498	0.7948	0.1601	1.12432	0.4976	0.735884	NA	0.3741	0.1808	NA	0.1324	NA	NA	NA
MIMAT0027648	NA	NA	NA	NA	NA	NA	NA	NA	NA	0.2696	NA	NA	NA	NA	NA	NA	NA	NA	NA	0.4534	NA	NA	NA	NA	0.342518	NA	NA	NA	NA	NA	NA	0.2888	NA	NA	NA	NA	NA	NA	NA	0.497518	0.361955	NA	NA	NA	NA	NA	NA	NA	NA
MIMAT0027353	NA	NA	NA	0.634	NA	NA	NA	NA	NA	NA	NA	NA	NA	NA	NA	NA	NA	NA	NA	NA	NA	NA	NA	NA	NA	NA	NA	NA	NA	NA	NA	NA	NA	NA	NA	NA	NA	NA	NA	NA	NA	NA	NA	NA	NA	NA	NA	NA	NA
MIMAT0010133	NA	0.641612	2.00742	0.870137	1.1111	1.50353	0.651991	4.28433	2.97886	1.70497	0.654242	1.84107	1.1341	1.32642	2.78833	0.795813	0.910822	0.2926	NA	1.30872	0.54351	1.37818	0.873949	1.09578	0.619103	1.21876	0.2517	1.0605	0.958226	2.14032	1.27978	2.25319	0.4033	1.4647	1.39771	0.959909	1.88543	1.2679	0.958996	0.2701	0.361955	0.823275	2.90941	1.13863	1.74497	1.04057	1.56861	1.30896	1.68767
MIMAT0028230	NA	NA	NA	NA	NA	NA	NA	NA	NA	NA	NA	NA	NA	NA	NA	NA	NA	NA	NA	NA	NA	NA	NA	NA	NA	NA	NA	NA	NA	NA	NA	NA	NA	0.2141	NA	NA	NA	NA	NA	NA	NA	NA	NA	NA	NA	NA	NA	NA	NA
MIMAT0021018	0.633753	0.291682	NA	NA	0.659972	NA	NA	NA	NA	0.2696	0.2525	0.4037	NA	NA	NA	0.3723	NA	NA	NA	0.2445	NA	0.2969	NA	NA	0.739762	NA	0.4659	NA	0.1823	NA	NA	NA	NA	NA	NA	NA	0.3161	0.1601	0.3057	NA	0.131	NA	0.530163	NA	NA	0.365462	NA	0.529306	NA
MIMAT0027605	NA	NA	NA	NA	NA	NA	NA	NA	NA	NA	NA	NA	NA	NA	NA	NA	NA	NA	NA	NA	NA	0.2969	NA	NA	NA	NA	NA	NA	NA	NA	NA	NA	NA	NA	0.2185	NA	NA	0.1601	NA	NA	NA	NA	NA	NA	NA	NA	NA	NA	NA
MIMAT0028232	NA	NA	0.4622	NA	NA	NA	NA	NA	NA	NA	0.2525	NA	NA	NA	NA	NA	NA	NA	0.2505	NA	NA	NA	NA	NA	NA	NA	NA	NA	NA	NA	0.333024	NA	NA	NA	NA	NA	NA	NA	NA	NA	NA	NA	0.1992	NA	NA	NA	NA	NA	NA
MIMAT0027604	1.25037	0.417953	0.4622	0.3516	0.903037	0.2677	0.652	NA	0.786192	NA	1.87866	0.9771	0.1628	NA	1.05254	0.372254	NA	0.2926	0.463872	0.635936	NA	0.7531	0.2728	NA	0.1814	0.6145	0.2517	1.4903	0.489685	NA	0.721695	NA	NA	NA	NA	0.959898	0.575236	1.03999	0.5577	0.497518	0.362	0.2065	NA	0.48598	0.1979	0.1324	0.9317	0.669999	NA
MIMAT0000071	9.02247	7.44601	10.3884	8.81187	8.69333	8.14994	8.50241	5.63258	10.1817	7.80963	8.81147	8.35352	8.09816	8.25312	9.04568	8.33781	8.69676	8.04471	8.10526	7.65883	8.15321	8.56037	8.48386	7.84276	7.75069	8.50852	7.80599	8.56113	9.50872	7.73806	9.45017	8.33234	9.11398	8.42991	8.26999	7.93797	7.70709	8.15358	8.21966	10.3091	8.04867	7.89557	8.12789	7.41644	8.44619	7.74069	8.94147	7.82896	9.10163
MIMAT0000070	9.65569	6.6179	10.7559	7.9297	8.99916	8.54912	8.92044	6.20111	9.27139	6.62052	10.2315	8.6637	7.63564	9.06353	8.37214	8.83213	9.64201	8.53297	8.80718	7.94816	9.54327	9.46029	8.98182	8.5919	8.6923	8.59428	8.91636	9.1425	9.99662	6.66301	8.0085	7.41951	9.53679	8.92049	9.32462	7.86968	6.3503	8.83126	9.06476	11.5279	8.57495	7.84819	7.48321	8.52377	6.6364	8.10888	7.47786	8.23632	7.61592
MIMAT0000073	5.63855	2.83993	8.03297	3.21385	4.97499	5.72792	4.65459	NA	5.16106	1.79315	4.55868	3.7646	3.52541	5.8466	3.48612	5.68631	6.87974	5.69523	5.82167	4.15413	6.13118	3.60818	5.16044	5.58339	5.15248	5.07275	5.58142	3.61093	5.97664	2.63674	3.72274	3.90316	4.86091	3.57058	5.2459	4.49506	2.56045	4.21742	6.3771	6.07705	4.20133	4.51412	3.32616	5.66685	2.22492	3.35424	3.33271	4.10888	3.52004
MIMAT0000072	4.72102	1.36064	6.29293	3.58946	4.82072	3.12912	4.64359	0.7525	4.33636	2.79884	4.68203	2.69793	2.96544	4.46666	1.88193	3.16184	4.80684	3.7405	3.96353	3.57225	4.83055	3.58086	3.25323	3.44752	3.41236	5.06133	3.13977	3.37974	5.17639	1.78655	3.5254	4.08369	4.53937	3.03574	5.01012	4.27321	2.22474	4.52008	4.53494	6.77775	3.29871	3.49952	2.27758	3.92155	2.26953	3.10307	2.11353	2.59072	3.43797
MIMAT0000075	9.31511	6.11984	10.2974	7.0984	7.94964	8.69254	8.06918	3.20417	8.8261	5.99717	9.46529	8.06786	7.37931	8.45777	7.34583	8.67312	9.24093	8.39813	8.66681	6.93668	9.16691	8.0529	8.34759	8.40266	8.23935	7.52506	8.43279	7.89715	9.20092	6.03213	7.43571	7.10105	9.03279	8.16302	8.31066	7.15187	5.77202	7.92118	8.559	10.1984	7.72166	7.16475	6.8321	8.14052	5.97122	7.49605	7.09612	7.453	6.98131
MIMAT0000074	8.29092	4.66765	9.78022	5.81217	7.26791	8.06569	7.15292	NA	7.60069	5.05572	6.27965	5.97701	6.25768	8.08702	6.45087	7.29102	8.51086	7.45139	7.62671	6.45596	8.26476	6.70094	6.72112	7.42267	7.64264	7.0945	7.36376	6.13171	7.85069	5.26255	6.66684	6.40541	7.46043	5.61953	7.39018	6.71119	4.52647	6.74732	8.08944	8.39245	6.00054	6.78667	6.77676	7.61326	5.03985	6.05416	6.10031	5.94453	5.63087
MIMAT0000077	16.6226	16.5141	16.5517	15.7835	16.8374	16.2856	16.5304	13.6837	16.1967	16.0205	16.3604	16.7321	16.399	16.1659	16.0287	15.7346	16.3133	15.9749	16.611	16.3778	15.7145	16.2197	16.7161	15.8871	16.4165	16.7498	15.5428	16.0662	15.9784	14.9211	16.4033	15.905	16.748	15.7984	14.9945	16.3594	16.6369	16.2596	16.2577	15.2868	14.8143	16.5607	15.8321	16.8105	15.9884	16.2508	15.7866	16.6111	15.5762
MIMAT0000076	18.95	18.52	18.5317	16.9252	18.282	18.05	18.7735	9.8484	17.8872	18.7248	18.249	17.7869	18.0925	18.5019	16.9867	19.3949	19.0674	18.8161	18.7746	18.2201	19.0649	18.0806	18.9615	19.1586	18.8478	18.2366	19.1728	18.5539	18.6328	15.3686	18.3971	17.6477	18.816	18.5625	18.0712	18.5987	18.8677	18.4336	18.8065	18.0784	17.3207	18.8282	17.8889	18.9999	18.7351	18.3251	18.5519	18.2899	17.9299
MIMAT0000079	4.28375	4.22465	4.31324	2.50863	2.88362	4.16391	4.11921	2.53422	2.91097	3.73644	1.10271	3.62056	4.66537	5.59989	3.17901	2.81465	4.50519	4.53965	3.56178	4.81477	4.20061	4.64318	1.88992	4.37983	5.69804	3.91366	3.80317	1.96163	4.05549	2.56061	3.5416	3.13033	3.4162	3.64626	5.06751	4.24474	2.29845	5.00438	5.75743	3.30076	2.26379	3.99332	4.84943	5.24228	2.84275	3.84387	3.53449	2.51814	3.20958
MIMAT0020924	NA	0.1532	NA	NA	NA	0.2677	NA	NA	0.786192	NA	NA	NA	0.1628	0.3234	0.6202	0.1981	NA	NA	NA	NA	NA	0.2969	NA	NA	NA	0.3397	NA	NA	0.1823	0.400007	NA	NA	NA	NA	NA	0.462664	NA	0.4352	NA	NA	NA	0.2065	0.1992	NA	0.371899	0.1324	0.3813	NA	0.964942
MIMAT0027606	NA	NA	NA	NA	NA	NA	NA	NA	NA	NA	NA	NA	NA	NA	NA	NA	NA	NA	NA	NA	NA	NA	NA	NA	NA	NA	NA	NA	NA	NA	NA	NA	NA	NA	NA	NA	NA	NA	NA	NA	NA	NA	NA	NA	NA	NA	NA	NA	NA
MIMAT0016873	NA	NA	NA	NA	NA	NA	NA	NA	NA	NA	NA	NA	NA	NA	NA	NA	NA	NA	NA	NA	NA	NA	NA	NA	NA	NA	NA	NA	NA	NA	NA	NA	NA	NA	NA	NA	NA	NA	NA	NA	NA	NA	NA	NA	NA	NA	NA	NA	NA
MIMAT0000099	12.6451	14.4154	12.9806	14.01	14.1234	13.9644	13.5834	6.16026	13.2383	13.888	12.2862	12.8052	14.7502	12.4985	12.5576	12.5115	11.8687	12.7759	12.9014	13.6339	12.965	13.376	12.6267	13.1609	12.5821	14.1419	12.2117	13.2516	13.6075	13.5076	13.5232	14.73	13.3237	13.6865	12.9847	14.1948	12.8834	13.5919	11.5794	13.247	12.5837	13.2923	13.1359	11.9154	14.0882	14.1384	14.5992	13.1769	12.5999
MIMAT0000098	13.8938	16.1853	11.5726	11.9139	11.8084	12.4074	12.9978	10.7677	14.0224	12.42	11.3022	13.8104	12.9834	11.9295	13.667	7.18556	11.5242	12.5627	12.6238	13.0674	13.1447	12.2671	12.2786	12.0333	12.8617	12.5317	11.331	16.207	11.7452	12.5767	12.2842	12.1466	12.9951	12.2315	11.7135	12.7562	12.6985	11.5156	12.063	10.8836	11.3004	15.2108	14.7313	12.6334	12.7107	12.6153	12.7668	10.5991	11.7017
MIMAT0000097	7.83797	8.72492	8.13728	7.92478	9.64063	9.37228	8.00645	5.76562	9.078	8.33802	8.14312	9.47885	9.49315	7.62039	8.99943	5.32769	7.19486	8.34224	8.72811	8.48657	7.73987	8.8025	7.02541	8.44025	8.42117	7.84787	6.95774	7.33695	8.95089	8.26823	8.58478	8.66956	8.2624	6.58083	9.14174	9.1135	7.76185	7.00234	7.64169	9.34347	7.94792	8.37427	8.47256	7.46636	8.47086	9.05497	8.3246	10.2179	5.62164
MIMAT0000096	4.79451	4.77778	5.57962	5.90808	6.15342	6.31678	5.31654	2.14513	6.54509	6.44449	4.59337	5.46803	6.02865	6.87166	6.12418	5.48296	5.5383	5.44273	5.72155	6.12674	5.79904	6.21153	5.37104	5.70069	5.39682	5.72164	4.91448	6.43303	7.52632	6.17937	5.3796	6.37494	5.04126	6.9897	7.33866	5.37338	5.74591	5.58668	6.09285	7.13136	5.57511	5.36861	5.54201	5.17452	5.95078	6.21773	5.02057	5.96853	5.6309
MIMAT0000095	4.22114	3.91763	6.05148	4.15641	5.90376	3.12912	4.21108	0.7525	4.3364	3.52094	1.72025	3.18134	4.78275	6.46282	3.34071	3.87687	4.76076	4.72276	6.2279	3.21871	4.25353	5.28257	4.27194	5.12057	5.74201	3.91367	4.35328	4.75785	5.46301	1.25383	4.90443	2.7574	5.6445	6.43645	4.38854	4.61117	3.3657	4.64037	7.1557	6.917	5.90081	4.52384	4.66809	5.56065	2.6868	4.79278	4.15287	5.60671	4.63228
MIMAT0000094	2.3609	0.641526	4.10743	3.88722	0.3674	2.34436	2.37567	3.40398	1.82212	2.29398	0.46732	2.46464	1.54189	1.17408	2.07817	2.62113	4.23999	2.67717	1.71171	1.30875	1.90508	1.98919	NA	2.24382	1.65247	1.04408	0.8175	2.08985	1.98684	1.99363	1.11654	1.95643	0.718139	1.8954	3.67478	1.21611	1.68015	2.44874	0.959035	0.497518	3.96709	1.15773	2.66199	2.43463	1.86622	1.63895	0.682585	0.915758	3.63512
MIMAT0000093	11.6367	10.6629	12.4997	12.2359	12.8934	11.7048	11.8227	12.0255	11.2511	9.71061	13.7172	12.9043	11.9183	13.4843	11.4512	12.2218	13.0191	12.3011	12.3381	11.9197	12.3298	12.045	12.3619	12.1681	12.3267	11.6262	12.0987	11.7761	13.2387	9.72901	10.862	10.6605	12.8964	12.1516	12.8661	11.3944	10.8837	11.5691	12.9518	13.6521	12.9967	11.4973	10.528	12.3454	10.0263	11.6033	10.5776	12.7394	10.3498
MIMAT0000092	14.2935	11.966	14.7982	13.1353	13.6997	13.2916	13.6693	16.3762	13.6455	11.9429	15.5577	14.2346	12.547	13.5519	13.9599	12.7743	14.2278	12.7963	13.2737	13.0325	13.8685	13.7068	13.3194	12.9477	13.0986	13.3719	12.7357	13.3116	14.1512	11.147	13.3171	12.465	14.2149	13.0219	14.1275	12.4841	11.5091	13.6177	13.34	15.6665	12.8323	12.6347	13.1886	13.0152	12.0288	12.8782	12.6324	12.4381	12.5008
MIMAT0000091	5.10311	4.58255	5.82997	2.98159	4.96161	4.62382	5.19428	1.9025	2.51346	2.29395	1.87872	2.28517	4.45353	3.59193	1.3848	3.0636	3.60269	3.61376	3.87307	6.01171	4.16428	3.68708	2.89783	3.57094	6.09856	5.43334	4.28439	5.4966	5.67187	1.11884	2.25236	2.18448	4.7442	4.4357	7.91677	4.59997	2.29848	5.38671	5.94044	6.36712	2.80507	4.77153	4.32875	3.65722	0.794849	4.33781	3.69476	3.21331	3.10704
MIMAT0000090	5.40491	4.64846	6.19966	5.71696	5.68542	5.57588	4.95836	0.7525	4.72031	5.57422	3.61864	3.12906	5.04535	5.49929	3.79613	5.31701	3.94257	4.96015	5.64164	4.93284	5.56112	4.57569	4.28737	5.461	5.38302	5.66993	4.44445	4.7959	5.24975	3.58147	5.52493	6.03311	5.45591	4.31331	6.10871	6.1214	3.64534	5.69198	4.8384	5.07641	4.23812	5.624	5.59154	4.96231	5.46165	5.72252	4.81887	3.99314	5.35699
MIMAT0004978	NA	0.2916	NA	1.4091	NA	0.688622	1.53823	NA	0.446	1.70497	1.10263	5.79604	0.779779	0.3234	1.0526	NA	0.3711	0.2926	NA	2.11228	1.61304	0.2969	0.2728	0.722273	1.87958	2.77414	0.2517	4.95587	1.14566	0.146	0.1761	0.5293	NA	0.713711	0.986213	0.2498	2.14706	1.03999	0.557813	NA	0.651107	4.29416	1.02585	0.617436	1.02067	0.253664	1.23959	0.798032	0.3976
MIMAT0004979	NA	NA	NA	NA	NA	NA	NA	NA	NA	NA	NA	NA	NA	NA	NA	NA	NA	NA	NA	NA	NA	NA	NA	NA	NA	NA	NA	NA	0.1823	NA	NA	NA	NA	NA	NA	NA	NA	NA	NA	NA	NA	NA	NA	NA	NA	NA	NA	NA	NA
MIMAT0004751	NA	NA	NA	NA	1.59927	NA	NA	NA	NA	0.496664	NA	NA	NA	0.3234	NA	NA	0.910745	0.743762	NA	NA	0.937435	0.5429	0.2728	0.2172	NA	NA	NA	NA	0.3442	0.146	0.1761	NA	NA	NA	NA	NA	NA	NA	0.3057	1.28767	0.361945	0.2065	NA	NA	NA	0.742182	NA	NA	0.708964
MIMAT0004752	1.07254	0.1532	1.70729	0.634082	4.96163	0.493416	1.94737	NA	0.446	1.87626	0.65426	0.4037	0.4419	0.587415	NA	0.667927	1.97587	1.88674	1.21868	1.91451	1.10028	2.88695	1.88995	0.4059	0.1814	2.06558	0.465942	1.29133	2.92619	NA	NA	0.2888	1.96447	0.400494	1.20662	0.2498	NA	1.19593	1.27262	5.23471	3.07292	NA	NA	NA	0.66723	2.41274	0.381281	1.81226	0.708964
MIMAT0004977	NA	NA	NA	NA	NA	NA	NA	NA	0.446	0.496664	0.46732	1.55442	1.99531	NA	NA	NA	0.6661	1.36388	0.4639	0.2445	1.61306	0.753091	NA	NA	0.1814	0.6145	0.2517	NA	1.05499	0.511979	0.1761	NA	1.1954	1.37854	NA	1.78965	1.78636	0.304195	NA	1.02113	NA	1.85434	0.3741	2.91505	0.527153	NA	0.2032	NA	NA
MIMAT0004971	NA	NA	NA	NA	NA	NA	NA	NA	NA	NA	NA	NA	NA	NA	NA	NA	NA	NA	NA	NA	NA	NA	NA	NA	NA	NA	NA	NA	NA	NA	NA	NA	NA	NA	NA	NA	NA	NA	NA	NA	NA	NA	NA	NA	NA	NA	NA	NA	NA
MIMAT0004972	NA	NA	NA	NA	NA	NA	NA	NA	NA	NA	0.2525	NA	NA	NA	NA	NA	NA	NA	NA	NA	NA	NA	NA	NA	NA	NA	NA	NA	NA	NA	NA	NA	NA	NA	NA	NA	NA	NA	NA	NA	NA	NA	NA	NA	NA	NA	NA	NA	NA
MIMAT0004757	3.03045	3.68612	2.00749	6.02274	2.33919	2.09171	2.6187	5.08167	0.446	0.2696	2.3806	1.9656	2.15864	2.81383	2.40518	0.372254	3.2491	3.47475	3.25295	4.1983	2.59292	0.753181	1.96881	2.1934	3.11051	2.65763	1.87513	2.41755	3.07197	0.889113	3.04783	0.529319	2.28398	1.54593	2.43674	1.86648	2.92861	2.94281	2.92742	3.96532	2.04855	2.40827	2.36313	3.21388	1.61254	4.27476	0.381281	4.67408	1.94707
MIMAT0022303	NA	0.1532	NA	NA	NA	NA	NA	NA	NA	NA	NA	NA	NA	NA	NA	NA	NA	NA	NA	0.2445	NA	0.7531	NA	NA	NA	NA	NA	NA	NA	NA	NA	NA	NA	NA	NA	NA	NA	NA	NA	NA	NA	NA	NA	NA	NA	0.1324	NA	NA	NA
MIMAT0022302	NA	NA	NA	NA	NA	NA	NA	NA	NA	NA	NA	NA	NA	NA	NA	NA	NA	NA	NA	NA	NA	NA	NA	NA	NA	NA	NA	NA	NA	NA	NA	NA	NA	NA	NA	NA	NA	NA	NA	NA	0.131	NA	NA	NA	NA	NA	NA	NA	NA
MIMAT0022300	NA	NA	0.4622	NA	NA	NA	NA	NA	NA	NA	0.2525	NA	NA	NA	NA	NA	NA	NA	NA	NA	NA	NA	NA	NA	NA	NA	NA	NA	NA	NA	NA	NA	NA	NA	NA	NA	NA	NA	NA	NA	NA	NA	NA	NA	NA	NA	NA	NA	NA
MIMAT0004570	1.40853	0.835228	2.0075	1.4091	1.852	3.40386	2.747	1.61076	0.446	0.865439	1.80165	2.28521	1.95149	2.09325	1.05254	1.54285	0.910822	1.79627	2.01219	1.76583	1.90513	1.49967	1.6237	2.55423	0.851081	2.71707	0.965697	3.69402	1.65789	1.54461	0.830996	1.78147	2.18514	2.36743	1.30528	1.43364	1.56539	2.89809	0.959082	1.95708	1.16081	1.05462	1.54808	2.36155	1.46676	2.38646	0.682585	1.87172	1.94706
MIMAT0004571	5.34747	4.56901	5.4976	5.47889	4.80581	4.61185	4.48092	9.11426	4.28371	4.38759	0.968134	5.79607	4.5886	5.26472	3.79609	2.58619	4.89485	4.53969	3.33655	4.80531	2.47913	4.81696	4.20837	4.27479	3.35681	2.77415	4.00503	NA	4.31184	2.17473	4.54398	2.89263	4.59816	4.34778	6.15911	3.81179	3.83062	7.10308	5.06888	6.0638	3.44442	3.78364	5.43248	3.67238	4.11407	4.49367	3.86913	2.96297	5.57436
MIMAT0022945	NA	NA	NA	NA	NA	NA	NA	NA	NA	NA	NA	NA	NA	NA	NA	NA	NA	NA	NA	NA	NA	NA	NA	NA	0.1814	NA	NA	NA	NA	NA	NA	NA	NA	NA	NA	0.462664	NA	NA	NA	NA	0.131	0.2065	NA	NA	NA	NA	NA	NA	NA
MIMAT0011156	NA	1.15834	NA	0.3516	NA	1.01405	NA	NA	NA	0.2696	NA	NA	0.1628	NA	0.6202	NA	0.3711	NA	NA	0.635936	NA	0.2969	NA	0.2172	0.3425	0.3397	0.4659	0.4456	0.1823	NA	0.1761	NA	0.9764	NA	0.2185	0.812381	NA	NA	NA	0.4976	NA	0.2065	NA	0.1808	0.527153	NA	0.2032	1.22026	NA
MIMAT0011157	NA	1.08404	NA	NA	NA	0.493416	NA	NA	NA	NA	NA	NA	0.309078	NA	0.6202	NA	NA	NA	NA	0.2445	NA	0.936437	NA	0.4059	NA	NA	NA	0.78556	NA	NA	NA	NA	0.4033	NA	0.72585	0.4626	NA	NA	NA	0.2701	NA	NA	NA	NA	NA	0.2536	NA	0.915689	NA
MIMAT0022940	NA	NA	NA	NA	NA	NA	NA	NA	NA	NA	NA	NA	NA	NA	NA	NA	NA	NA	NA	NA	NA	NA	NA	NA	NA	NA	NA	NA	NA	NA	NA	NA	NA	NA	NA	NA	NA	NA	NA	NA	NA	NA	NA	NA	NA	NA	NA	NA	NA
MIMAT0022942	NA	NA	NA	NA	NA	NA	NA	0.7525	NA	NA	0.2525	NA	NA	0.3234	NA	0.372254	NA	NA	NA	NA	NA	NA	0.2728	NA	NA	NA	NA	NA	NA	NA	NA	NA	NA	NA	NA	NA	NA	NA	NA	NA	NA	NA	NA	NA	NA	NA	NA	0.1988	NA
MIMAT0011158	NA	NA	NA	NA	NA	NA	NA	NA	NA	0.2696	NA	NA	NA	NA	NA	NA	NA	NA	NA	NA	NA	NA	NA	NA	NA	0.3397	NA	NA	NA	NA	NA	NA	0.4033	NA	NA	NA	NA	0.304195	NA	0.2701	NA	0.2065	NA	NA	NA	NA	NA	NA	0.3976
MIMAT0022948	NA	NA	NA	NA	NA	NA	NA	NA	NA	NA	NA	0.4037	NA	NA	NA	NA	NA	NA	NA	NA	NA	NA	NA	NA	NA	NA	NA	NA	0.1823	NA	NA	0.2888	NA	NA	NA	NA	NA	NA	NA	0.4976	0.251089	NA	0.3741	NA	NA	NA	NA	NA	NA
MIMAT0016855	NA	NA	NA	NA	NA	NA	NA	NA	NA	NA	NA	NA	NA	NA	NA	NA	NA	NA	NA	NA	NA	NA	NA	NA	NA	NA	NA	NA	NA	NA	NA	NA	NA	NA	NA	NA	NA	NA	NA	NA	NA	NA	NA	NA	NA	NA	NA	NA	NA
MIMAT0016850	NA	NA	NA	NA	NA	NA	NA	NA	NA	NA	NA	NA	NA	NA	NA	NA	NA	NA	NA	NA	NA	NA	NA	NA	NA	NA	NA	NA	NA	NA	NA	NA	NA	NA	NA	NA	NA	NA	NA	NA	NA	NA	NA	NA	NA	NA	NA	NA	NA
MIMAT0018968	NA	0.2916	0.4622	0.3516	1.11105	NA	NA	1.61073	1.29229	0.4967	NA	0.977166	0.3091	NA	NA	NA	0.666009	NA	NA	1.19699	0.2972	NA	2.72693	0.2172	0.342518	0.3397	0.4659	0.78556	0.1823	NA	NA	NA	0.718139	0.713711	2.20062	NA	0.3161	1.46488	0.557813	1.02116	0.651065	0.692	0.799214	0.48603	0.527	0.566142	0.2032	0.373494	0.708964
MIMAT0018969	NA	NA	NA	NA	0.3674	NA	NA	NA	NA	NA	NA	NA	NA	0.3234	NA	NA	NA	NA	NA	NA	NA	NA	NA	NA	NA	NA	NA	NA	NA	NA	NA	NA	NA	0.2141	NA	NA	NA	NA	NA	NA	NA	NA	NA	NA	NA	0.1324	NA	NA	NA
MIMAT0023714	NA	NA	NA	NA	NA	NA	NA	NA	NA	NA	NA	NA	NA	NA	NA	NA	NA	NA	NA	NA	NA	NA	NA	NA	NA	NA	NA	NA	NA	NA	NA	NA	NA	NA	NA	NA	NA	NA	NA	NA	NA	NA	NA	NA	NA	NA	NA	NA	NA
MIMAT0018967	NA	NA	NA	NA	0.3674	NA	NA	NA	NA	NA	NA	NA	NA	NA	NA	NA	NA	NA	NA	NA	NA	NA	NA	NA	NA	NA	0.2517	NA	NA	NA	NA	NA	NA	NA	NA	NA	NA	NA	NA	NA	NA	NA	NA	NA	0.1979	NA	NA	NA	NA
MIMAT0018965	0.3514	0.2916	NA	NA	0.659972	NA	1.62989	3.57949	NA	NA	NA	NA	NA	NA	NA	0.3723	NA	0.535746	0.463872	0.4534	NA	0.7531	NA	0.2172	0.4874	1.04405	NA	NA	0.344127	NA	NA	NA	NA	NA	NA	1.09372	0.575236	0.1601	0.3057	NA	0.131	NA	0.1992	0.1808	NA	0.899106	0.2032	NA	NA
MIMAT0018962	0.3514	1.0842	1.09283	0.634082	1.45426	1.01399	0.465597	NA	0.446	1.79315	1.10274	0.4037	0.675625	0.587415	1.05254	0.667889	0.3711	0.743762	0.962065	0.63603	1.24643	1.71586	0.873893	0.572818	1.71269	0.614462	1.63069	0.4456	1.14558	0.969765	0.721685	1.07596	0.718139	1.08401	1.48463	1.32903	0.794837	1.12006	1.12439	1.95707	1.27846	0.823279	0.799266	0.617345	0.912325	0.822873	0.931692	0.529301	0.708964
MIMAT0018963	NA	NA	NA	NA	NA	NA	NA	NA	0.446	NA	NA	NA	NA	NA	NA	NA	NA	NA	0.2505	NA	NA	NA	NA	NA	NA	NA	NA	1.2913	NA	NA	NA	NA	NA	NA	NA	NA	NA	NA	NA	NA	NA	NA	NA	NA	NA	0.1324	NA	NA	NA
MIMAT0018960	NA	0.1532	NA	0.3516	0.6599	NA	NA	NA	NA	1.2859	0.46732	0.718783	0.309078	0.3234	0.6202	NA	NA	0.743762	NA	NA	0.2972	NA	0.2728	0.2172	NA	NA	NA	1.06052	0.489619	0.146	0.603389	NA	0.4033	0.713626	NA	0.4626	0.3161	NA	0.3057	1.02109	0.131	0.38711	0.91707	0.1808	NA	0.365521	0.2032	NA	0.964942
MIMAT0018961	0.3514	1.36063	1.09275	1.07301	1.11105	0.493416	0.4656	1.61073	1.29223	0.6928	0.654242	1.19629	0.1628	0.587415	2.25087	0.1981	0.3711	NA	0.2505	0.943591	0.937503	1.09924	0.873949	NA	0.487436	NA	0.2517	0.4456	0.621834	0.146	1.02752	NA	0.4033	NA	1.20652	0.462664	1.5654	0.304195	0.5577	0.866832	0.131	0.823272	0.671063	0.1808	2.31285	0.3655	2.00898	0.915689	2.44431
MIMAT0026916	NA	NA	NA	NA	0.903037	NA	0.465597	NA	NA	NA	0.2525	NA	NA	NA	NA	NA	NA	0.2926	NA	0.453506	NA	NA	NA	NA	0.1814	NA	NA	NA	0.1823	NA	0.1761	NA	NA	NA	NA	NA	0.3161	NA	NA	0.4976	0.464907	0.2065	NA	NA	0.1979	0.253664	NA	0.1988	NA
MIMAT0026917	NA	NA	NA	NA	0.3674	NA	0.2515	NA	0.446	NA	NA	NA	NA	0.3234	NA	NA	NA	NA	NA	NA	NA	NA	NA	NA	NA	NA	0.2517	NA	NA	NA	NA	NA	0.4033	NA	0.408219	NA	NA	NA	NA	NA	NA	NA	NA	NA	NA	0.1324	NA	0.1988	NA
MIMAT0019763	NA	0.1532	NA	NA	0.3674	NA	NA	NA	0.446	NA	NA	NA	NA	NA	NA	NA	NA	NA	0.2505	0.453506	NA	NA	NA	NA	0.342518	NA	NA	NA	0.489619	NA	NA	NA	NA	NA	NA	0.2498	NA	NA	NA	NA	NA	NA	0.374203	NA	NA	NA	NA	NA	NA
MIMAT0019762	NA	NA	NA	0.634	NA	NA	NA	NA	NA	NA	NA	NA	NA	NA	NA	0.1981	NA	NA	NA	NA	0.2972	NA	NA	0.2172	0.1814	NA	NA	NA	NA	0.2786	0.1761	0.529319	NA	NA	NA	NA	NA	0.1601	NA	NA	NA	NA	NA	0.1808	NA	NA	NA	NA	NA
MIMAT0019761	3.03049	2.23138	2.89127	2.93021	4.57955	2.91174	4.13494	0.7525	3.04363	3.32782	5.4478	2.768	2.56049	2.65018	2.67158	3.27586	3.99655	3.03467	3.03663	3.3551	2.14786	3.58089	4.54066	2.66918	2.40256	3.40019	3.10825	5.00545	3.13975	1.31683	4.00523	3.01637	3.12765	4.03224	5.04626	3.09782	2.56047	3.42491	3.24721	3.10751	2.47585	3.4597	3.61467	3.4259	2.81285	3.99068	3.31086	3.14266	3.8724
MIMAT0019760	0.633753	0.291682	NA	0.3516	0.903098	NA	0.965119	NA	0.7863	0.496664	1.4443	0.977166	0.563592	NA	NA	0.1981	0.910745	0.2926	0.4639	0.453506	0.2972	0.2969	0.5022	0.2172	NA	0.845206	NA	0.4456	0.344127	0.146	1.11661	0.2888	0.7181	0.713711	1.64396	0.2498	0.3161	0.8651	NA	NA	0.561019	0.2065	1.2217	0.48603	0.3718	0.365462	0.812522	0.1988	1.1823
MIMAT0019767	NA	NA	0.4622	NA	NA	NA	NA	NA	NA	NA	NA	NA	NA	NA	NA	NA	NA	NA	NA	0.2445	NA	NA	NA	NA	NA	NA	NA	NA	NA	NA	NA	NA	NA	NA	0.2185	NA	NA	NA	NA	NA	NA	NA	NA	NA	NA	NA	NA	NA	NA
MIMAT0019766	NA	NA	NA	NA	NA	NA	NA	NA	NA	NA	NA	NA	NA	NA	NA	NA	NA	NA	NA	NA	NA	NA	NA	NA	NA	NA	0.2517	NA	NA	NA	NA	NA	NA	NA	NA	NA	NA	NA	NA	NA	NA	NA	NA	NA	NA	NA	NA	NA	NA
MIMAT0019765	NA	NA	NA	NA	0.6599	NA	NA	NA	NA	NA	NA	NA	NA	0.5875	NA	NA	NA	NA	NA	NA	NA	NA	NA	0.2172	NA	0.3397	NA	NA	0.1823	NA	NA	0.2888	NA	0.2141	NA	0.2498	NA	NA	NA	0.2701	0.2511	NA	NA	NA	NA	NA	NA	NA	NA
MIMAT0019764	NA	0.1532	0.4622	NA	NA	NA	NA	NA	NA	NA	0.4673	NA	NA	NA	NA	NA	NA	NA	0.2505	NA	0.2972	NA	NA	NA	NA	NA	0.2517	0.4456	0.1823	NA	0.1761	NA	0.4033	NA	NA	0.462664	NA	NA	NA	NA	NA	0.2065	NA	NA	NA	0.1324	NA	0.373494	NA
MIMAT0019769	NA	NA	NA	NA	NA	0.2677	NA	NA	NA	NA	NA	NA	NA	NA	NA	NA	NA	NA	NA	NA	NA	NA	NA	NA	NA	0.3397	NA	NA	NA	NA	NA	NA	0.4033	NA	0.2185	0.2498	NA	NA	NA	0.2701	0.131	0.2065	NA	NA	NA	NA	NA	0.1988	NA
MIMAT0019768	0.3514	0.534076	NA	NA	0.659972	0.860451	NA	NA	0.446	NA	0.2525	0.977235	0.1628	0.5875	NA	0.527672	NA	NA	0.6497	0.636	0.9374	0.543004	NA	0.2172	0.1814	0.3397	0.652407	NA	0.621847	0.146	0.47452	0.2888	NA	NA	0.5757	0.2498	NA	0.3042	0.5577	0.2701	0.131	NA	0.7992	0.48603	0.1979	0.365462	NA	0.3735	0.708964
MIMAT0018083	NA	NA	NA	NA	0.903	0.493416	0.2515	NA	0.446	NA	1.80161	0.4037	NA	1.17414	NA	0.372254	NA	0.2926	NA	0.2445	1.37927	NA	NA	0.2172	NA	0.8452	0.2517	NA	0.9583	NA	NA	NA	0.4033	0.565633	1.48457	0.462664	NA	NA	0.7723	0.2701	0.8918	0.2065	0.1992	0.486	NA	0.1324	0.3813	0.1988	0.3976
MIMAT0018082	NA	0.291682	NA	NA	NA	NA	NA	NA	NA	NA	NA	NA	NA	NA	NA	NA	NA	NA	NA	NA	NA	NA	NA	NA	NA	NA	NA	NA	NA	NA	NA	NA	NA	NA	NA	NA	NA	NA	NA	NA	NA	NA	NA	NA	NA	NA	NA	NA	NA
MIMAT0025486	0.633753	NA	NA	0.3516	NA	NA	NA	NA	0.446	NA	0.2525	NA	NA	0.3234	NA	0.372254	NA	NA	NA	NA	NA	0.2969	0.2728	0.2172	0.1814	NA	0.2517	NA	0.344127	NA	0.1761	NA	NA	NA	NA	NA	NA	0.3042	NA	NA	0.251089	NA	NA	0.1808	0.527	NA	NA	0.1988	NA
MIMAT0019947	NA	NA	NA	NA	NA	NA	NA	NA	NA	NA	NA	NA	NA	NA	NA	NA	NA	NA	NA	0.2445	NA	NA	NA	NA	NA	NA	NA	NA	NA	NA	NA	NA	NA	NA	NA	NA	NA	NA	NA	NA	0.131	NA	NA	NA	NA	NA	NA	NA	NA
MIMAT0019946	NA	NA	NA	NA	NA	NA	NA	NA	NA	NA	NA	NA	NA	NA	NA	NA	NA	NA	NA	NA	NA	NA	NA	NA	NA	NA	NA	NA	NA	NA	NA	NA	NA	NA	0.2185	NA	NA	NA	NA	NA	NA	NA	NA	NA	NA	NA	NA	NA	NA
MIMAT0019945	NA	NA	NA	NA	NA	NA	NA	NA	NA	NA	NA	NA	NA	NA	NA	NA	NA	NA	NA	NA	NA	NA	NA	NA	NA	NA	NA	NA	NA	NA	NA	NA	NA	NA	NA	NA	NA	NA	NA	NA	NA	NA	NA	NA	NA	NA	NA	NA	NA
MIMAT0019944	NA	0.2916	NA	0.3516	NA	0.2677	NA	NA	0.446	NA	NA	NA	NA	NA	NA	NA	0.3711	NA	NA	0.2445	NA	NA	0.2728	NA	0.1814	0.3397	NA	0.4456	NA	NA	NA	0.2888	NA	NA	NA	0.2498	NA	0.3042	NA	0.2701	NA	NA	0.1992	NA	0.1979	0.1324	0.3813	NA	NA
MIMAT0019943	NA	0.291682	NA	NA	NA	0.493416	NA	0.7525	NA	0.2696	0.65426	0.4037	0.309078	0.81058	NA	0.91325	0.3711	0.2926	0.2505	0.2445	0.753915	0.753091	0.5022	0.405938	0.487436	0.3397	NA	NA	0.489619	0.146	0.474542	0.915699	NA	NA	0.575864	0.959909	NA	0.304195	0.557813	NA	0.251089	0.2065	0.374203	0.1808	0.1979	0.566142	0.381281	0.66991	0.3976
MIMAT0019942	NA	NA	NA	NA	NA	NA	NA	NA	NA	NA	NA	NA	NA	NA	NA	NA	NA	NA	NA	0.2445	NA	NA	NA	NA	NA	NA	NA	NA	NA	NA	NA	NA	NA	NA	NA	NA	NA	0.3042	NA	NA	NA	NA	NA	NA	NA	NA	NA	NA	NA
MIMAT0019941	NA	0.418028	NA	NA	NA	NA	NA	0.7525	NA	NA	NA	NA	NA	NA	NA	NA	NA	NA	NA	NA	NA	0.2969	NA	NA	NA	NA	0.4659	NA	0.1823	NA	0.1761	NA	NA	NA	NA	NA	NA	NA	NA	NA	NA	NA	NA	NA	NA	NA	NA	NA	NA
MIMAT0019940	0.3514	0.1532	NA	NA	NA	NA	NA	NA	NA	NA	0.6542	NA	NA	NA	NA	NA	NA	NA	NA	0.2445	NA	NA	NA	NA	NA	NA	NA	NA	NA	NA	NA	NA	NA	0.2141	NA	NA	NA	0.1601	NA	0.2701	NA	0.2065	0.1992	NA	NA	NA	NA	0.1988	NA
MIMAT0019949	0.633753	NA	NA	NA	0.6599	NA	NA	NA	NA	NA	NA	NA	0.3091	0.3234	NA	NA	NA	0.2926	NA	0.63603	0.2972	NA	NA	0.2172	0.1814	NA	NA	NA	NA	0.4	0.603389	0.2888	0.4033	NA	NA	0.812412	NA	NA	NA	0.2701	0.131	NA	0.799189	NA	0.1979	NA	0.2032	NA	NA
MIMAT0019948	NA	0.4179	0.4622	0.3516	0.903	NA	NA	NA	0.446	NA	0.654242	0.718783	0.3091	0.8106	NA	0.1981	NA	NA	0.2505	NA	NA	0.543004	0.2728	0.2172	NA	1.04405	NA	NA	0.1823	NA	0.932613	NA	NA	NA	0.86192	0.2498	NA	0.4352	0.557813	0.2701	0.131	NA	0.1992	0.1808	NA	0.4693	0.2032	0.1988	0.3976
MIMAT0025474	0.633753	0.835113	0.4622	1.91051	3.81252	0.688622	2.01691	1.61073	0.446	2.41008	1.44419	1.96555	1.41833	1.70567	0.6202	0.795813	1.30265	0.925461	0.649739	0.2445	0.937366	0.936525	0.699952	0.4059	0.342518	1.37458	1.87509	NA	1.71811	0.512	2.50419	1.35125	0.976396	2.45422	0.86192	1.32897	1.15365	0.768933	2.32535	0.497518	0.963942	1.05455	1.12708	0.737824	1.54149	1.5937	1.83642	1.30899	2.06126
MIMAT0025475	NA	NA	NA	NA	0.659972	NA	0.465597	NA	NA	NA	NA	NA	NA	NA	NA	NA	NA	NA	NA	NA	NA	NA	NA	NA	NA	NA	NA	NA	NA	NA	NA	NA	NA	NA	NA	NA	NA	0.1601	0.3057	NA	NA	NA	NA	NA	NA	0.1324	NA	NA	NA
MIMAT0025476	NA	NA	NA	NA	NA	NA	NA	NA	NA	NA	NA	NA	NA	NA	NA	NA	NA	NA	NA	NA	NA	NA	NA	0.2172	NA	NA	NA	NA	NA	NA	NA	NA	NA	NA	NA	NA	NA	NA	NA	NA	NA	NA	NA	NA	NA	NA	NA	NA	NA
MIMAT0020300	NA	NA	NA	NA	NA	NA	NA	NA	NA	NA	NA	NA	NA	NA	NA	NA	NA	NA	NA	NA	NA	NA	NA	NA	NA	NA	NA	NA	NA	NA	NA	NA	NA	NA	NA	NA	NA	NA	NA	NA	NA	NA	NA	NA	NA	NA	NA	NA	NA
MIMAT0025477	1.25037	3.37956	NA	NA	4.39306	NA	0.465597	1.61073	1.66616	0.496664	NA	2.28518	2.96542	1.46426	NA	0.91321	0.3711	2.39831	0.962041	1.0758	1.10027	4.9509	1.88989	4.14831	0.739762	2.53073	0.2517	NA	2.03508	0.146	0.830933	0.2888	0.4033	0.970899	3.65625	3.12932	3.25905	1.33665	1.40703	2.17008	1.94551	1.50917	NA	0.848943	0.667172	0.1324	1.95371	1.1257	NA
MIMAT0025470	NA	NA	1.32794	NA	NA	1.01407	NA	1.24453	NA	0.2696	NA	NA	NA	NA	NA	NA	NA	0.2926	0.4639	0.635936	NA	NA	NA	NA	NA	NA	0.2517	NA	NA	0.889113	0.1761	NA	0.4033	NA	0.2185	0.812412	NA	NA	NA	NA	NA	0.2065	0.374203	NA	NA	NA	NA	NA	0.3976
MIMAT0025471	NA	NA	NA	NA	NA	NA	NA	NA	NA	NA	NA	NA	0.3091	NA	NA	NA	NA	NA	NA	NA	NA	NA	NA	NA	NA	NA	NA	NA	NA	NA	NA	NA	NA	NA	NA	NA	NA	NA	NA	0.2701	NA	NA	NA	NA	NA	NA	NA	NA	NA
MIMAT0005902	NA	0.1532	NA	0.3516	0.3674	NA	0.2515	NA	NA	0.2696	0.9681	0.4037	NA	0.5875	NA	0.1981	NA	NA	NA	NA	0.2972	NA	NA	NA	0.1814	0.3397	NA	NA	NA	NA	NA	NA	0.4033	NA	0.725893	NA	0.3161	0.435195	NA	0.4976	0.735866	0.3871	NA	NA	NA	0.899101	NA	0.3735	NA
MIMAT0005903	NA	0.417953	0.8116	1.40912	NA	NA	NA	NA	0.7863	NA	4.79564	1.19623	1.54183	NA	NA	NA	0.6661	0.2926	NA	0.2445	0.2972	0.5429	2.48019	NA	0.1814	0.3397	0.2517	NA	1.65784	NA	0.603389	0.2888	NA	0.2141	0.2185	NA	0.794806	0.555293	NA	NA	6.13738	0.2065	1.81412	NA	NA	2.06057	0.2032	NA	NA
MIMAT0005900	NA	0.1532	NA	NA	0.903	0.493416	1.22225	NA	NA	0.692834	NA	NA	0.309078	1.32649	NA	NA	0.3711	0.743723	0.962053	0.797949	0.54351	NA	NA	NA	0.739748	0.8452	0.2517	1.66511	0.344127	NA	NA	NA	0.976396	0.4006	0.861961	1.43365	NA	1.84069	0.3057	0.4976	0.131	1.79162	NA	0.341444	NA	0.656806	0.2032	NA	0.3976
MIMAT0005901	1.07259	1.15836	0.8116	2.01267	2.06696	0.688622	1.22224	3.94279	0.446	1.51058	1.95183	1.70488	0.779795	1.8127	1.38475	1.54288	1.12	0.925496	1.71171	2.23054	1.71708	1.37816	0.700015	1.09574	1.65246	2.15427	0.2517	0.78556	2.33388	NA	1.89767	1.35122	2.46343	0.400494	0.7259	1.70853	1.44077	1.3366	1.2725	1.02113	0.815943	1.91448	1.22166	2.36155	0.794976	1.10651	1.04179	1.39249	0.964942
MIMAT0005906	NA	NA	0.4622	NA	NA	NA	NA	NA	NA	0.2696	NA	NA	0.309078	0.3234	NA	NA	NA	NA	NA	NA	NA	0.936525	NA	NA	0.48742	0.3397	NA	NA	0.344127	NA	0.47452	NA	NA	0.4006	NA	NA	0.3161	NA	NA	0.2701	NA	0.2065	NA	0.48603	NA	0.365462	NA	NA	NA
MIMAT0005907	NA	NA	NA	NA	NA	NA	NA	NA	NA	NA	NA	NA	NA	NA	NA	NA	0.3711	NA	NA	0.453506	NA	0.2969	NA	NA	NA	NA	NA	NA	NA	NA	NA	NA	NA	NA	0.2185	0.462664	NA	NA	0.3057	NA	NA	NA	NA	NA	NA	NA	NA	NA	NA
MIMAT0005905	NA	0.1532	1.70735	0.870207	1.1111	0.493416	0.465597	2.14519	1.06127	1.01957	0.654242	1.84116	0.675625	0.810507	0.6202	0.1981	1.6105	0.743762	0.649715	0.2445	0.753837	1.49969	2.53298	0.722349	1.2264	0.3397	0.817539	1.06052	0.621774	0.146	0.474542	NA	2.18515	NA	1.39775	NA	0.985385	0.555289	1.27265	0.497518	0.464897	0.38711	1.54817	0.617345	0.667311	0.656854	0.2032	0.915685	1.68764
MIMAT0028222	0.869743	0.2916	0.4622	0.8701	0.3674	1.9467	0.2515	NA	NA	0.692803	NA	0.4037	0.675735	0.3234	0.6202	0.3723	0.9108	NA	0.6497	0.2445	1.50089	0.5429	NA	0.4059	1.0509	1.8698	0.2517	NA	0.621847	0.7129	0.1761	NA	NA	NA	1.10055	1.8665	1.15365	NA	2.02421	NA	1.71437	0.823266	0.1992	1.45199	0.527	0.899138	NA	0.669914	NA
MIMAT0028223	NA	NA	NA	NA	NA	NA	NA	NA	NA	NA	NA	NA	NA	NA	NA	NA	NA	NA	NA	NA	NA	NA	NA	NA	NA	NA	NA	NA	NA	NA	NA	NA	NA	NA	NA	NA	NA	NA	NA	NA	NA	0.2065	NA	NA	NA	NA	NA	NA	NA
MIMAT0028220	NA	NA	NA	NA	NA	NA	NA	1.61073	NA	0.692803	NA	0.718783	0.309078	0.3234	NA	0.1981	NA	NA	0.2505	NA	NA	0.2969	NA	0.4059	NA	0.614462	NA	NA	0.489619	NA	0.1761	NA	NA	NA	NA	NA	NA	0.1601	0.3057	NA	NA	NA	0.530255	0.1808	0.1979	0.253664	0.539793	NA	NA
MIMAT0005909	0.633753	1.00584	0.4622	1.25083	0.903098	0.688548	0.817034	NA	0.446	0.692834	0.654242	1.38647	0.779693	0.587415	NA	NA	NA	0.743723	NA	0.453506	0.54351	0.936596	NA	1.63788	1.3067	0.3397	0.652407	NA	0.742887	0.615896	0.603409	1.68536	0.4033	0.713711	0.986134	1.32892	0.3161	0.4351	0.5577	NA	0.131	1.05457	0.530163	1.04835	0.371899	0.822853	0.682585	0.1988	NA
MIMAT0028226	NA	NA	NA	NA	NA	NA	NA	NA	NA	NA	NA	NA	NA	NA	NA	NA	NA	NA	NA	NA	NA	NA	NA	NA	NA	NA	NA	NA	NA	NA	NA	NA	NA	NA	NA	NA	NA	NA	NA	NA	NA	NA	NA	NA	NA	NA	NA	NA	NA
MIMAT0028227	NA	NA	0.4622	NA	NA	NA	NA	NA	NA	NA	NA	NA	0.1628	0.3234	NA	NA	NA	NA	NA	NA	NA	NA	NA	NA	NA	NA	NA	NA	NA	NA	NA	NA	NA	NA	NA	NA	NA	NA	NA	NA	NA	NA	NA	NA	NA	0.1324	NA	NA	NA
MIMAT0028224	NA	NA	NA	NA	NA	NA	NA	NA	NA	NA	NA	NA	NA	NA	NA	NA	NA	NA	NA	NA	NA	NA	NA	NA	NA	NA	NA	NA	NA	NA	NA	NA	NA	NA	NA	NA	NA	NA	NA	NA	NA	NA	NA	NA	NA	NA	NA	NA	NA
MIMAT0028225	NA	NA	NA	NA	NA	NA	NA	NA	NA	NA	NA	NA	NA	NA	NA	NA	NA	NA	NA	NA	NA	NA	NA	NA	NA	NA	NA	NA	NA	NA	NA	NA	NA	NA	0.2185	NA	NA	NA	NA	NA	NA	NA	NA	NA	NA	NA	NA	NA	NA
MIMAT0021023	NA	NA	NA	0.3516	NA	NA	NA	NA	NA	NA	0.2525	NA	0.1628	0.587415	NA	NA	NA	0.2926	NA	NA	NA	NA	NA	NA	NA	NA	0.2517	NA	NA	NA	NA	0.2888	NA	NA	NA	NA	NA	0.1601	NA	NA	0.815944	NA	NA	NA	NA	NA	NA	0.1988	NA
MIMAT0021022	NA	0.2916	1.09275	0.3516	NA	0.688622	0.651991	NA	0.446	0.692803	1.54226	NA	0.3091	0.3234	NA	0.795746	0.3711	0.5357	NA	1.07587	0.2972	NA	NA	0.2172	0.1814	0.614462	0.465942	NA	0.621894	0.146	0.333	NA	0.4033	0.713711	0.408219	0.959881	NA	0.666063	0.3057	0.2701	0.464897	0.2065	0.374203	NA	0.1979	0.656837	0.381281	0.373494	0.708964
MIMAT0021021	NA	NA	NA	0.3516	0.3674	NA	0.817036	2.97214	0.786192	1.28593	1.54234	0.977235	0.309078	0.810507	1.05254	0.667889	0.666009	0.2926	NA	0.2445	0.2972	0.2969	0.502128	NA	NA	0.614462	NA	NA	0.489619	NA	1.02757	0.735411	0.4033	0.2141	0.575864	0.648065	0.3161	0.666145	0.3057	0.866825	0.251089	NA	1.31054	NA	0.1979	0.822837	1.04179	0.1988	0.964912
MIMAT0021020	0.633753	0.641571	2.13692	1.55169	1.45415	2.02106	1.09942	NA	0.7863	0.865437	0.4673	1.84113	1.28322	1.32649	0.6202	0.372254	1.3027	1.69971	0.962073	0.943547	0.937435	1.49966	0.873935	0.722273	0.954491	1.64334	0.652407	1.06052	2.03511	0.969798	0.4745	1.07586	0.976396	1.83195	0.7259	1.43366	0.794806	1.33661	0.3057	1.40456	3.75998	1.3441	0.530255	0.848943	0.794849	1.22985	0.812528	1.98381	2.67688
MIMAT0021026	NA	0.2916	NA	1.25083	NA	0.2677	0.651989	NA	0.446	0.496664	NA	0.4037	NA	NA	0.6202	NA	0.6661	0.2926	NA	0.2445	NA	0.2969	NA	NA	0.851096	1.76102	NA	NA	0.621834	NA	NA	NA	NA	0.2141	1.39769	0.812381	0.794806	0.1601	0.772256	1.1606	0.651144	0.2065	NA	NA	NA	0.971606	NA	0.1988	0.709
MIMAT0021025	0.3514	NA	NA	NA	NA	NA	NA	NA	NA	NA	NA	NA	NA	NA	NA	NA	NA	NA	NA	NA	NA	NA	NA	NA	NA	NA	NA	NA	NA	NA	NA	NA	0.4033	NA	0.2185	NA	NA	NA	NA	NA	0.131	NA	NA	0.1808	NA	NA	NA	NA	NA
MIMAT0021024	NA	NA	NA	NA	NA	0.2677	NA	NA	NA	NA	NA	NA	NA	NA	NA	NA	NA	0.2926	NA	NA	NA	NA	NA	NA	NA	0.6145	NA	NA	NA	NA	NA	NA	NA	NA	NA	NA	NA	NA	NA	NA	0.361945	0.2065	NA	NA	NA	NA	NA	NA	NA
MIMAT0021028	NA	NA	NA	NA	NA	NA	NA	NA	0.446	NA	NA	NA	NA	NA	NA	NA	NA	NA	NA	NA	NA	NA	NA	NA	NA	NA	NA	NA	NA	NA	NA	NA	NA	NA	NA	NA	NA	NA	NA	NA	0.361945	NA	NA	NA	NA	NA	NA	NA	NA
MIMAT0022279	NA	NA	NA	NA	NA	NA	NA	NA	NA	NA	NA	NA	NA	NA	NA	NA	NA	NA	NA	NA	NA	NA	NA	NA	NA	NA	NA	NA	NA	NA	NA	NA	NA	NA	NA	NA	NA	NA	NA	NA	NA	NA	NA	NA	NA	NA	NA	NA	NA
MIMAT0000242	5.87385	1.42225	1.09275	6.6003	1.85202	1.86826	2.70547	6.17404	4.87081	1.79313	2.38053	2.08016	2.19677	0.587415	4.7432	1.30571	1.30262	1.9719	1.94276	2.1726	0.2972	0.543004	1.52277	0.572783	1.30669	3.07614	2.42851	4.17057	0.1823	1.8304	1.20049	0.2888	4.89256	2.17639	2.20065	2.85557	5.28419	1.19588	0.772256	1.61312	6.47305	1.50921	3.71566	0.341444	1.30443	1.16948	2.21098	0.798032	0.964942
MIMAT0000243	14.7121	16.9016	15.4684	14.5612	16.7526	15.8029	15.4489	11.7636	15.5059	14.5565	15.4727	14.1427	15.8322	15.0217	14.8212	14.9923	14.2724	15.1988	15.7931	16.8132	14.8986	17.3032	15.2246	14.8021	15.269	17.0934	15.6098	13.1265	15.621	13.6218	15.6254	14.7832	15.3402	13.3589	14.4925	15.8741	13.9121	15.6991	14.7872	14.7679	14.9151	15.1565	15.6421	13.7656	14.9615	16.9908	15.672	14.8744	15.5153
MIMAT0022278	NA	NA	NA	NA	NA	NA	NA	NA	NA	NA	0.2525	NA	NA	NA	NA	NA	NA	NA	NA	NA	NA	NA	NA	NA	NA	NA	NA	NA	NA	NA	NA	NA	NA	NA	NA	0.2498	NA	0.1601	NA	NA	NA	0.2065	NA	0.1808	NA	NA	NA	NA	NA
MIMAT0000244	8.42894	7.2572	10.0486	8.33913	9.42448	11.1347	8.41499	9.71728	8.59427	9.3841	7.57669	9.2169	9.94495	9.58167	9.08616	8.75505	8.94452	9.64718	9.39652	9.06696	9.79104	9.05572	7.16168	9.63548	9.53253	8.42517	9.12873	7.87732	9.29858	8.00179	7.36818	8.70833	9.0284	7.56843	8.72601	8.50006	7.31725	8.90766	9.40819	8.47908	7.44695	8.57506	8.8944	9.23962	7.53964	8.35651	7.256	8.25873	6.59747
MIMAT0000245	12.0437	12.1811	12.9015	14.1251	12.678	15.2213	12.7456	13.3075	13.5787	13.657	12.9783	14.6918	13.8472	15.4086	15.0448	12.6118	13.6076	12.8723	13.1806	13.015	13.3951	12.9008	12.9598	13.2839	13.5754	12.1728	13.9741	11.7729	13.3312	14.2113	13.4588	13.8822	12.5509	13.1537	12.2193	12.3316	12.3819	12.7427	13.4673	13.4922	13.4503	11.9155	14.8974	12.8773	12.4514	13.163	13.0264	13.2843	12.5244
MIMAT0004981	NA	NA	NA	NA	0.3674	NA	NA	NA	NA	NA	NA	NA	NA	NA	NA	NA	NA	NA	0.2505	0.4534	NA	NA	NA	NA	0.1814	0.6145	NA	NA	NA	NA	NA	NA	NA	NA	NA	0.2498	NA	NA	NA	NA	0.251089	NA	0.1992	NA	0.1979	NA	NA	NA	NA
MIMAT0002861	NA	NA	NA	0.3516	NA	NA	0.2515	2.14516	NA	NA	1.63403	NA	NA	NA	NA	NA	NA	NA	NA	NA	NA	NA	0.2728	NA	NA	NA	NA	NA	0.344127	0.146	NA	0.2888	NA	NA	NA	NA	NA	NA	NA	NA	0.251089	0.692014	NA	NA	NA	0.1324	0.2032	NA	NA
MIMAT0002862	NA	NA	NA	0.3516	NA	NA	NA	0.7525	NA	NA	1.10268	0.4037	NA	NA	NA	NA	NA	0.2926	NA	NA	NA	0.2969	NA	NA	NA	0.3397	NA	NA	1.59487	NA	NA	NA	NA	NA	NA	NA	NA	NA	NA	0.2701	0.2511	0.547595	NA	NA	NA	NA	NA	NA	NA
MIMAT0002863	NA	NA	NA	NA	NA	NA	NA	0.7525	NA	NA	0.968134	0.4037	NA	NA	0.6202	NA	NA	NA	NA	NA	NA	NA	0.502128	NA	NA	NA	NA	NA	NA	0.146	NA	NA	NA	NA	0.2185	NA	NA	NA	NA	NA	NA	1.25395	NA	NA	NA	NA	NA	NA	NA
MIMAT0002864	NA	NA	NA	NA	NA	NA	NA	NA	NA	NA	0.6542	NA	NA	NA	NA	NA	NA	NA	NA	NA	NA	NA	NA	NA	NA	NA	NA	NA	NA	NA	NA	NA	NA	NA	NA	NA	NA	NA	NA	NA	NA	NA	NA	NA	NA	NA	NA	NA	NA
MIMAT0004987	0.3514	1.42221	1.09275	1.07297	0.6599	0.4935	0.2515	NA	0.446	0.8654	1.1026	NA	2.61773	NA	1.3848	NA	NA	1.0869	2.01221	0.636	4.02928	1.49965	0.2728	0.2172	3.33778	2.15424	0.2517	NA	0.958274	0.7129	2.04108	1.35121	0.4033	0.4006	7.04922	3.55762	2.78217	1.33663	1.93803	4.27252	0.464939	2.67481	1.3105	2.43456	1.92323	0.9716	1.32916	1.92885	1.18227
MIMAT0002867	NA	NA	NA	NA	NA	NA	NA	NA	NA	NA	0.9681	NA	NA	NA	NA	NA	NA	NA	NA	NA	NA	NA	0.2728	NA	NA	NA	NA	NA	NA	NA	NA	NA	NA	NA	NA	NA	NA	NA	NA	NA	NA	1.50922	NA	NA	NA	NA	NA	NA	NA
MIMAT0002868	NA	0.1532	NA	0.3516	0.3674	NA	NA	NA	NA	NA	NA	NA	0.1628	NA	0.6202	NA	0.3711	NA	NA	NA	0.2972	0.936525	0.2728	NA	0.1814	NA	NA	NA	2.5484	0.146	NA	0.2888	NA	0.2141	NA	NA	NA	NA	NA	NA	0.464897	1.65728	NA	NA	NA	NA	NA	NA	NA
MIMAT0002869	0.3514	NA	0.4622	NA	NA	0.2677	0.2515	1.61073	NA	0.2696	1.22571	NA	NA	NA	NA	NA	NA	0.2926	NA	NA	0.753915	0.543004	0.2728	NA	NA	NA	0.465942	NA	2.51479	0.278573	NA	0.2888	0.976429	NA	0.408219	0.2498	NA	0.1601	NA	NA	0.2511	1.5851	NA	NA	NA	NA	NA	NA	NA
MIMAT0000646	8.77068	7.12803	7.50678	8.93569	9.27919	8.04023	9.32996	7.51664	7.36419	8.62084	9.76806	9.49829	8.48102	9.40363	8.88612	9.91653	7.70733	8.61466	8.82475	8.77199	9.5433	10.3732	7.12772	8.54557	9.62059	9.6517	9.08383	7.54972	8.07409	6.83308	8.21858	10.234	7.65768	7.22703	7.50371	10.915	7.55379	8.84939	8.01246	7.49964	6.69048	8.83826	7.70411	9.40959	9.16446	10.2401	9.44355	7.90297	7.42933
MIMAT0027419	NA	NA	NA	NA	NA	NA	NA	NA	NA	NA	NA	NA	NA	NA	NA	NA	NA	NA	NA	NA	NA	NA	NA	NA	NA	NA	NA	NA	NA	NA	NA	NA	NA	NA	NA	NA	NA	NA	NA	NA	NA	NA	NA	NA	NA	NA	NA	NA	NA
MIMAT0027410	0.3514	NA	0.4622	1.91054	1.29286	0.860405	0.465597	NA	0.446	1.70498	1.72024	0.4037	0.779677	1.58996	NA	1.38911	NA	0.743762	0.814349	1.6852	1.10022	1.49974	0.502128	0.2172	0.851109	1.04405	0.465942	2.08982	0.854513	0.278573	0.603371	0.915694	NA	1.28695	0.575758	1.09372	0.575236	0.435195	0.557813	0.497518	1.71431	0.823266	0.530255	0.341444	0.66723	0.899111	0.539793	0.798023	NA
MIMAT0027411	NA	NA	NA	NA	NA	NA	NA	NA	NA	NA	NA	NA	NA	NA	NA	NA	NA	NA	NA	NA	NA	NA	NA	NA	NA	NA	NA	NA	NA	NA	NA	NA	NA	NA	NA	NA	NA	0.1601	NA	NA	NA	NA	NA	NA	NA	NA	NA	NA	NA
MIMAT0027412	NA	NA	NA	NA	NA	NA	NA	NA	NA	NA	NA	NA	NA	NA	NA	NA	NA	NA	NA	NA	NA	NA	NA	NA	NA	NA	NA	NA	NA	NA	NA	NA	NA	NA	NA	NA	NA	NA	NA	NA	NA	NA	NA	NA	NA	NA	NA	NA	NA
MIMAT0027413	NA	0.1532	NA	NA	NA	NA	NA	NA	NA	0.2696	NA	NA	NA	NA	0.6202	NA	NA	NA	NA	NA	0.2972	NA	NA	NA	0.1814	NA	NA	NA	NA	NA	NA	NA	NA	NA	NA	0.2498	NA	NA	NA	0.4976	0.131	NA	NA	NA	NA	NA	NA	0.3735	NA
MIMAT0027414	NA	NA	NA	0.3516	NA	NA	NA	NA	NA	NA	NA	NA	NA	NA	NA	NA	NA	NA	NA	NA	0.2972	NA	NA	NA	NA	NA	NA	NA	NA	NA	NA	0.2888	NA	NA	NA	NA	0.3161	NA	NA	NA	NA	NA	NA	NA	NA	NA	NA	NA	NA
MIMAT0027415	NA	NA	0.4622	NA	NA	NA	NA	NA	NA	NA	NA	NA	0.1628	NA	0.6202	NA	NA	0.2926	NA	NA	NA	NA	NA	NA	NA	NA	NA	NA	NA	NA	NA	NA	NA	0.2141	NA	NA	NA	0.1601	NA	0.2701	NA	NA	NA	NA	NA	NA	NA	0.1988	NA
MIMAT0027416	NA	NA	NA	NA	NA	NA	NA	NA	NA	NA	NA	NA	NA	NA	NA	NA	NA	NA	NA	NA	NA	NA	NA	NA	NA	NA	NA	NA	0.3442	NA	NA	NA	NA	NA	NA	NA	NA	NA	NA	NA	NA	NA	NA	NA	NA	NA	NA	NA	NA
MIMAT0027417	NA	NA	NA	NA	0.3674	NA	0.2515	NA	0.446	0.2696	0.2525	NA	NA	0.3234	NA	NA	NA	NA	NA	NA	NA	0.2969	0.2728	NA	0.342518	0.3397	NA	NA	NA	NA	NA	0.2888	NA	NA	NA	NA	0.3161	NA	NA	NA	0.362	NA	NA	NA	NA	0.469306	NA	0.5294	NA
MIMAT0027630	NA	NA	NA	NA	NA	NA	NA	NA	NA	NA	NA	NA	NA	NA	NA	NA	NA	NA	NA	NA	NA	NA	NA	NA	NA	NA	NA	NA	NA	NA	NA	NA	NA	NA	NA	NA	NA	NA	NA	NA	NA	NA	NA	NA	NA	NA	NA	NA	NA
MIMAT0027631	NA	NA	NA	NA	NA	NA	NA	NA	NA	NA	NA	NA	NA	NA	NA	NA	NA	NA	NA	NA	NA	NA	NA	NA	0.1814	NA	NA	NA	NA	NA	NA	NA	NA	NA	NA	NA	NA	NA	NA	NA	NA	NA	NA	NA	NA	NA	NA	NA	NA
MIMAT0027632	NA	NA	0.4622	NA	NA	NA	NA	NA	NA	NA	NA	NA	NA	NA	NA	NA	NA	NA	NA	NA	NA	NA	NA	NA	NA	NA	NA	NA	NA	NA	NA	NA	NA	NA	NA	NA	NA	NA	NA	NA	NA	NA	NA	NA	NA	NA	NA	NA	NA
MIMAT0027633	NA	NA	NA	NA	NA	NA	NA	NA	NA	NA	0.2525	NA	NA	NA	NA	NA	NA	NA	NA	NA	NA	NA	NA	NA	NA	NA	0.2517	NA	0.1823	0.146	NA	NA	NA	NA	NA	NA	NA	NA	NA	NA	0.131	NA	NA	NA	NA	NA	NA	NA	NA
MIMAT0027634	NA	NA	NA	NA	NA	NA	NA	NA	NA	NA	NA	NA	NA	NA	NA	NA	NA	NA	NA	NA	NA	NA	NA	NA	NA	NA	NA	NA	NA	NA	NA	NA	NA	NA	0.4081	NA	NA	NA	NA	NA	NA	NA	NA	NA	NA	NA	NA	NA	NA
MIMAT0027635	NA	NA	NA	NA	NA	NA	NA	NA	NA	NA	NA	NA	NA	NA	NA	NA	NA	NA	NA	NA	NA	NA	NA	NA	NA	NA	NA	NA	NA	NA	NA	NA	NA	NA	NA	NA	NA	NA	NA	NA	NA	NA	NA	NA	NA	NA	NA	NA	NA
MIMAT0027636	NA	NA	NA	NA	NA	NA	NA	NA	NA	NA	NA	NA	NA	NA	NA	NA	NA	NA	NA	NA	NA	NA	NA	NA	NA	NA	NA	NA	NA	NA	NA	NA	NA	0.2141	NA	NA	NA	NA	NA	NA	0.131	NA	NA	NA	NA	NA	NA	NA	NA
MIMAT0027637	NA	0.1532	1.3279	NA	0.903037	0.86047	0.652	NA	NA	1.40262	NA	NA	0.563592	0.8106	NA	0.795813	NA	0.2926	0.2505	0.453506	0.5436	NA	0.700015	0.857786	1.3067	0.3397	NA	NA	NA	NA	0.333	0.915699	NA	0.970883	NA	0.2498	NA	0.4352	NA	0.2701	0.735859	NA	0.3741	NA	0.1979	NA	NA	NA	0.708964
MIMAT0027638	NA	NA	NA	NA	NA	NA	NA	NA	NA	NA	NA	NA	NA	NA	NA	NA	NA	NA	NA	NA	NA	NA	NA	NA	NA	NA	NA	NA	NA	NA	NA	NA	NA	NA	NA	NA	NA	NA	NA	NA	NA	NA	NA	NA	NA	NA	NA	NA	NA
MIMAT0027639	NA	NA	NA	NA	NA	NA	NA	NA	NA	NA	NA	NA	NA	NA	NA	NA	NA	NA	NA	NA	NA	NA	NA	NA	NA	NA	NA	NA	NA	NA	NA	NA	NA	NA	NA	NA	NA	NA	NA	NA	NA	NA	NA	NA	NA	NA	NA	NA	NA
MIMAT0004185	NA	NA	NA	NA	NA	NA	NA	NA	NA	NA	NA	NA	NA	NA	NA	NA	NA	NA	NA	0.2445	NA	NA	NA	NA	NA	NA	NA	NA	NA	NA	NA	NA	NA	NA	NA	NA	NA	NA	NA	NA	NA	NA	NA	NA	NA	NA	NA	NA	NA
MIMAT0018196	NA	0.1532	NA	NA	NA	NA	0.2515	NA	NA	NA	NA	NA	NA	NA	NA	NA	NA	NA	NA	NA	NA	NA	NA	NA	NA	NA	NA	NA	NA	NA	NA	NA	NA	NA	0.2185	NA	NA	NA	NA	NA	NA	NA	NA	NA	NA	NA	NA	NA	NA
MIMAT0027524	NA	NA	NA	NA	NA	NA	NA	NA	NA	NA	NA	NA	NA	NA	NA	NA	NA	NA	NA	NA	NA	NA	NA	NA	NA	NA	NA	NA	NA	NA	NA	NA	NA	NA	NA	NA	NA	NA	NA	NA	NA	NA	0.1992	0.341444	NA	NA	NA	NA	NA
MIMAT0020959	NA	0.417953	0.811703	0.3516	0.659972	0.493416	0.2515	NA	0.446	0.496664	NA	NA	0.44188	0.810507	0.6202	0.1981	NA	NA	NA	0.2445	0.2972	NA	0.502128	0.2172	0.3425	0.614462	0.2517	NA	NA	0.146	NA	0.2888	NA	NA	NA	0.812331	NA	0.1601	NA	0.2701	NA	0.547595	0.671063	0.1808	0.79505	0.253664	0.2032	0.1988	NA
MIMAT0027526	NA	NA	NA	NA	0.3674	NA	0.2515	NA	NA	NA	NA	NA	NA	NA	NA	0.1981	NA	NA	NA	NA	NA	NA	NA	NA	NA	NA	NA	NA	0.1823	NA	NA	NA	NA	NA	NA	NA	NA	NA	NA	NA	NA	NA	NA	NA	NA	NA	NA	NA	NA
MIMAT0027527	NA	NA	NA	NA	NA	0.2677	NA	NA	NA	NA	NA	NA	0.1628	0.5875	NA	NA	0.3711	0.535746	NA	NA	NA	NA	NA	NA	0.1814	NA	NA	NA	NA	NA	NA	NA	NA	NA	NA	NA	NA	0.1601	0.3057	0.4976	0.131	0.3871	NA	NA	NA	NA	0.2032	NA	0.3976
MIMAT0005582	0.3514	0.641526	1.09275	0.634082	1.11102	0.493416	0.651991	2.35274	NA	NA	0.46732	0.4037	0.309078	0.587415	NA	0.527672	0.666009	NA	0.6497	1.19693	0.5436	1.24536	NA	0.2172	0.6191	1.21874	0.652407	0.4456	1.38767	NA	0.333	0.7354	0.718139	0.2141	0.575758	0.648065	0.5752	0.555293	0.958911	0.694	0.361955	0.547595	0.1992	0.341444	0.1979	0.566142	NA	1.12575	0.3976
MIMAT0005583	0.3514	0.6415	0.4622	NA	1.111	0.6886	1.44042	2.84035	0.446	0.496664	0.819716	1.84111	1.05335	1.0038	0.6202	0.3723	0.910822	NA	0.463872	1.68519	0.937435	0.5429	0.5022	NA	1.05091	1.3746	1.10001	1.29135	1.05506	NA	0.603371	0.529319	0.9764	0.4006	0.861874	1.21615	0.985353	0.555293	0.557813	0.4976	1.22086	0.8232	0.530163	0.952105	0.527064	0.6569	0.682591	1.02447	1.53803
MIMAT0005580	NA	NA	NA	0.3516	0.3674	0.2677	0.2515	2.35274	NA	0.6928	0.8196	NA	0.1628	NA	NA	NA	NA	NA	NA	0.2445	NA	0.9365	NA	NA	NA	0.3397	NA	NA	0.1823	NA	0.1761	NA	NA	NA	1.10063	NA	NA	0.3042	NA	0.4976	0.963913	NA	0.1992	NA	NA	0.1324	NA	NA	0.709
MIMAT0027523	NA	NA	NA	NA	0.3674	NA	NA	NA	NA	0.2696	NA	NA	NA	NA	NA	NA	NA	NA	NA	NA	NA	NA	NA	NA	NA	NA	NA	NA	NA	NA	0.1761	NA	NA	NA	NA	NA	NA	NA	NA	NA	NA	NA	0.1992	NA	NA	0.1324	NA	NA	NA
MIMAT0027528	NA	NA	NA	NA	NA	0.2677	NA	NA	NA	NA	NA	0.4037	NA	NA	NA	NA	NA	NA	NA	NA	NA	0.2969	NA	NA	NA	NA	NA	NA	0.489619	NA	NA	NA	NA	NA	NA	NA	NA	0.1601	NA	NA	NA	NA	NA	0.1808	NA	NA	NA	NA	NA
MIMAT0027529	NA	NA	NA	NA	0.3674	0.4935	NA	0.7525	NA	0.2696	NA	NA	0.309078	NA	NA	NA	NA	NA	NA	0.2445	NA	0.936525	NA	NA	0.1814	0.3397	NA	NA	0.1823	NA	NA	NA	NA	0.2141	0.2185	0.648065	NA	NA	0.772354	0.694	0.891833	NA	0.1992	0.1808	NA	0.1324	0.2032	0.1988	NA
MIMAT0020956	NA	NA	0.4622	NA	NA	NA	NA	0.7525	NA	NA	NA	NA	NA	0.3234	NA	NA	NA	NA	NA	NA	NA	NA	NA	NA	NA	0.3397	NA	NA	NA	NA	NA	NA	NA	NA	NA	NA	NA	0.1601	NA	NA	NA	NA	NA	0.1808	NA	NA	NA	NA	NA
MIMAT0005589	NA	0.1532	0.4622	NA	0.3674	0.2677	NA	1.24453	NA	NA	0.2525	NA	0.1628	NA	NA	NA	NA	NA	0.2505	0.2445	NA	NA	NA	NA	0.1814	NA	NA	NA	NA	NA	NA	NA	0.4033	0.2141	NA	0.2498	NA	0.1601	NA	NA	0.251089	NA	0.1992	NA	0.1979	NA	NA	NA	NA
MIMAT0030411	NA	NA	NA	NA	NA	NA	NA	NA	NA	NA	NA	NA	NA	NA	NA	NA	NA	NA	NA	NA	NA	NA	NA	NA	NA	NA	NA	NA	NA	NA	NA	NA	NA	NA	NA	NA	NA	NA	NA	NA	NA	NA	NA	NA	NA	NA	NA	NA	NA
MIMAT0030412	NA	NA	NA	NA	NA	NA	NA	NA	NA	NA	NA	NA	NA	NA	NA	NA	NA	NA	NA	0.2445	NA	NA	NA	NA	NA	0.6145	NA	NA	NA	NA	NA	NA	NA	NA	NA	NA	NA	NA	NA	NA	NA	NA	NA	NA	NA	NA	NA	NA	NA
MIMAT0030413	NA	NA	NA	0.3516	0.3674	NA	NA	0.7525	NA	NA	NA	NA	0.309078	NA	NA	NA	NA	NA	NA	NA	0.753837	0.2969	NA	0.857786	NA	NA	NA	NA	0.344127	NA	NA	NA	NA	NA	NA	NA	NA	NA	NA	NA	NA	NA	NA	NA	NA	NA	0.2032	NA	NA
MIMAT0030414	NA	NA	NA	NA	NA	NA	NA	2.14514	NA	NA	NA	NA	NA	NA	NA	NA	NA	NA	NA	0.2445	0.2972	0.2969	NA	0.405938	0.1814	NA	NA	NA	NA	0.2786	0.1761	NA	NA	NA	NA	NA	NA	0.304195	NA	NA	NA	NA	NA	NA	NA	NA	NA	NA	NA
MIMAT0030416	NA	NA	NA	NA	NA	NA	NA	NA	NA	NA	NA	NA	NA	NA	NA	0.372254	NA	NA	0.4639	NA	NA	0.2969	0.2728	NA	NA	0.3397	NA	NA	0.1823	NA	NA	NA	NA	NA	NA	NA	NA	0.1601	NA	NA	NA	NA	NA	NA	NA	NA	NA	NA	NA
MIMAT0030417	0.6337	0.534125	1.09283	0.870137	NA	0.4935	0.2515	NA	1.06136	1.40262	0.2525	0.718783	0.44188	NA	NA	0.667889	0.6661	NA	0.463872	0.2445	NA	0.2969	NA	0.722349	0.1814	NA	0.4659	NA	0.344127	NA	0.603369	0.2888	NA	0.2141	0.575758	0.462664	0.575236	0.769092	NA	0.497518	0.651099	NA	0.1992	0.1808	0.3718	0.253664	0.539776	0.1988	NA
MIMAT0030418	0.633753	0.534125	0.4622	NA	NA	0.2677	0.465597	NA	1.0613	0.496664	0.2525	NA	NA	0.3234	NA	0.372254	0.3711	0.2926	NA	0.2445	0.5436	0.753181	0.502128	0.857854	NA	NA	NA	NA	0.489619	NA	0.1761	NA	NA	NA	0.2185	0.2498	NA	0.435195	0.3057	0.693993	0.251089	0.823268	NA	0.48598	0.1979	0.253664	0.539776	0.3735	NA
MIMAT0030419	NA	NA	NA	0.3516	NA	NA	NA	NA	0.446	NA	0.2525	NA	NA	NA	NA	0.372254	NA	NA	NA	NA	NA	NA	NA	NA	NA	NA	NA	0.78556	NA	NA	NA	NA	NA	NA	NA	NA	NA	NA	NA	NA	NA	0.2065	NA	0.1808	NA	0.253664	NA	0.1988	NA
MIMAT0004749	1.25037	2.23145	2.0075	0.870137	3.36179	1.69737	2.26566	1.90255	2.31764	2.75563	3.11268	1.3864	1.54188	2.1758	2.99684	1.12282	0.910822	1.97187	1.33172	2.74937	0.9374	1.90368	1.16923	1.56039	2.07573	1.86982	2.52722	5.23075	2.51477	0.803735	1.84649	1.07586	2.62299	1.95617	0.5757	2.46905	1.88541	1.93226	1.12432	2.75825	1.16073	2.48961	2.6619	3.15022	2.43559	2.24737	2.68819	3.34502	2.52612
MIMAT0004748	4.736	4.35669	6.07591	6.12328	6.21103	5.86545	5.2313	9.4242	6.55073	7.11761	4.64939	6.8123	5.47548	6.77237	7.91025	5.02252	5.11841	5.43523	5.38433	5.40469	5.90199	6.25535	5.12643	5.49262	5.77063	5.3229	5.06171	6.08637	5.41826	6.25978	5.61178	7.09638	5.12365	5.1588	7.61134	5.65895	5.6436	6.15092	5.53322	4.81663	4.23081	4.95447	7.50335	5.39198	5.85513	5.04874	6.08429	5.11648	7.37241
MIMAT0000428	NA	0.741567	2.36557	1.80053	2.16348	2.60834	0.2515	NA	0.446	0.865467	3.40088	0.977166	2.94322	0.81058	NA	NA	0.910822	0.925476	1.21871	0.943547	1.81415	0.5429	1.96877	0.857758	1.45508	1.21874	2.01763	NA	1.59491	0.400007	NA	1.68526	1.55341	0.400494	0.2185	0.462664	NA	2.05955	2.25568	0.693993	2.39986	0.943583	3.50609	0.617363	0.1979	2.09344	NA	0.1988	NA
MIMAT0000429	1.55119	0.1532	1.09275	0.3516	0.903098	NA	1.94738	NA	5.37773	NA	2.43261	0.7187	NA	NA	NA	0.1981	0.3711	NA	0.2505	1.19695	0.54351	0.2969	NA	1.4787	4.36181	1.04405	1.79811	1.96167	1.59494	NA	2.77436	0.5293	1.3855	1.95612	1.91813	2.60973	4.01675	NA	4.18794	0.2701	0.651065	3.11995	0.3741	5.2725	0.66723	0.822771	0.539793	0.669999	NA
MIMAT0000426	6.23769	5.57601	6.12353	6.33033	6.2987	5.94876	7.18536	7.78642	6.93078	6.79085	7.61098	7.90636	6.0626	6.27429	7.11941	6.22126	6.86529	6.52096	7.75384	7.10097	6.0084	6.78999	6.92021	6.78568	6.61673	7.04023	6.57495	6.77085	6.65383	5.47093	8.03939	6.17703	6.64397	7.38315	6.50646	6.16769	6.56703	6.99574	7.00478	6.71975	7.2457	6.46096	7.19333	6.64682	6.91995	6.75577	7.47051	6.00547	6.75414
MIMAT0000427	1.25035	2.48341	3.79059	2.50868	1.45426	5.37074	3.1697	8.22977	1.49125	3.2046	0.968044	5.59872	4.89706	2.00558	3.179	0.667927	1.97585	5.19077	1.94273	4.0291	1.71709	1.37811	0.873935	2.63193	3.77907	2.98236	2.37655	1.66505	2.33382	3.92282	2.50421	3.30222	1.70382	1.46469	2.39249	4.32856	0.794806	3.14774	2.32532	2.23466	1.27851	3.55721	3.07059	2.16077	2.13118	2.38639	3.26623	1.98373	0.3976
MIMAT0000424	6.40199	7.28752	6.23626	8.61063	8.42048	6.83511	7.38921	6.7431	7.38935	7.64907	8.52202	7.72672	6.23263	6.82449	6.64143	6.59529	6.65037	6.74917	6.55034	7.35801	6.42034	7.4463	7.53153	5.77959	5.93447	7.71928	6.23141	7.291	8.02498	5.55178	7.46356	6.53171	7.20061	7.30205	8.90792	6.95708	7.33489	6.89832	6.80923	7.79943	7.78084	6.72924	6.39048	6.58194	7.06955	7.3802	7.08172	7.21691	7.96278
MIMAT0000425	5.76832	5.27172	6.09994	5.50545	7.58363	7.49544	7.80002	3.57948	5.64123	6.1088	6.4119	6.71367	6.3869	5.65125	6.02057	5.44927	6.26644	7.33566	6.19095	6.82127	7.31782	6.88229	4.57886	6.42289	7.32826	6.72974	6.63428	7.67253	6.86195	5.05632	4.96559	5.81763	5.90736	5.82895	7.17041	7.35037	5.20978	6.11958	6.83033	8.2717	5.41398	7.19845	5.73076	6.76489	5.29343	6.55505	4.65538	4.94023	4.70429
MIMAT0000422	NA	NA	NA	0.3516	NA	NA	0.465597	0.7525	NA	0.2696	NA	NA	NA	NA	NA	NA	0.666009	NA	NA	0.453506	NA	NA	NA	NA	0.1814	0.845206	NA	NA	NA	NA	NA	NA	NA	0.2141	NA	NA	0.575236	NA	NA	NA	2.04854	0.2065	NA	NA	0.1979	1.68282	0.381281	NA	NA
MIMAT0000423	9.9613	11.0503	8.53989	7.76191	8.82373	9.08158	9.51629	10.4094	9.18067	8.77086	8.29493	10.6346	9.21205	9.00189	9.42965	5.72303	8.92029	9.60204	9.05148	10.465	9.32911	9.12114	7.8942	8.74446	9.8932	9.06883	8.02338	11.3383	9.21571	8.01254	8.61184	8.24023	8.9702	7.8771	9.44423	9.58297	8.61002	8.61127	9.19011	9.39298	8.117	10.8053	9.48163	9.77996	8.70792	9.29486	8.42004	9.26123	7.06916
MIMAT0000420	8.53575	7.00766	10.6766	9.78746	9.63907	11.2371	9.18921	6.03031	8.38194	9.30805	6.85484	8.6417	10.0536	12.0075	9.94954	7.80849	9.46402	8.98424	9.00168	9.29224	10.043	8.80841	7.47357	9.2011	9.7854	8.78176	9.37716	7.8773	8.97855	8.67802	8.42827	9.72185	8.73927	8.12715	8.72822	9.40176	6.86263	8.97584	9.7406	9.88126	8.1347	8.83487	9.89373	9.21524	7.89805	8.92554	7.7186	7.99358	7.10284
MIMAT0000421	NA	NA	NA	NA	NA	0.688622	NA	NA	NA	NA	10.6632	NA	NA	NA	NA	NA	0.666009	0.2926	NA	0.2445	NA	NA	NA	NA	NA	NA	NA	NA	NA	NA	NA	NA	NA	0.2141	NA	0.812412	NA	1.9322	NA	NA	0.131	NA	NA	0.737824	0.1979	0.469306	NA	NA	NA
MIMAT0003214	0.869788	0.641526	0.4622	0.634	0.3674	2.15914	1.79732	0.7525	NA	1.95482	0.8197	1.55442	3.29892	0.587415	NA	NA	NA	2.05229	1.62567	3.43118	0.2972	2.41707	0.5022	1.09572	0.3425	1.76099	1.22289	0.4456	0.958248	0.146	1.84652	0.735394	1.38549	2.45424	0.9862	1.32899	0.3161	1.40209	1.12427	0.497518	0.361955	1.15773	1.54811	0.952083	0.66723	1.44882	1.32915	0.373494	NA
MIMAT0003215	2.70397	1.36065	3.66742	1.25083	NA	1.27942	0.2515	2.53426	2.83972	1.28593	NA	NA	0.1628	2.6502	1.3848	0.527631	2.35253	NA	0.2505	5.22407	0.5436	0.2969	0.2728	0.981693	0.1814	0.3397	0.965697	NA	1.52909	1.25373	0.932604	1.47143	NA	NA	0.2185	NA	NA	0.66615	0.557813	0.2701	1.43886	0.2065	0.1992	NA	1.61251	2.4888	0.2032	1.2202	2.16695
MIMAT0003218	7.69553	7.10357	6.82687	8.32435	8.58425	7.3677	9.02857	8.78765	8.04846	7.93119	7.52972	8.78479	7.81249	7.11605	8.19575	7.36116	7.58925	7.91764	7.88344	8.13601	7.12559	6.33915	7.03916	6.90387	6.49555	7.50617	7.31449	6.4922	7.28972	5.22199	7.67626	6.7133	7.90869	7.01489	7.72609	7.17845	7.46461	7.47163	7.26595	3.69416	7.48497	7.17252	7.7385	8.00085	7.3997	7.60266	8.541	7.33519	9.50091
MIMAT0003219	NA	NA	NA	NA	NA	NA	NA	NA	NA	NA	NA	NA	NA	NA	NA	NA	NA	NA	NA	NA	NA	NA	NA	NA	NA	NA	NA	NA	NA	NA	NA	NA	NA	NA	NA	NA	NA	NA	NA	NA	NA	NA	NA	NA	NA	NA	NA	NA	NA
MIMAT0004563	11.9925	11.8172	10.0876	9.08609	11.8064	10.7075	12.6208	7.65538	10.39	10.3958	9.08171	9.9474	10.8532	10.2328	9.3735	8.97106	11.6628	11.2552	11.0621	12.9501	11.418	11.3501	10.1926	10.8729	12.1909	12.2366	10.4618	10.2921	11.0744	8.94543	10.8172	9.6109	10.4234	10.8955	10.9341	11.9358	11.513	10.6094	11.4168	10.9249	10.0491	12.0819	10.322	12.3368	11.1401	10.5839	10.4405	9.79066	9.55364
MIMAT0004562	NA	NA	0.4622	NA	NA	NA	NA	NA	NA	NA	NA	NA	NA	NA	NA	NA	NA	NA	NA	1.07588	NA	NA	NA	0.405938	NA	NA	NA	0.4456	0.1823	NA	NA	NA	NA	NA	0.986134	NA	NA	NA	NA	NA	NA	NA	NA	NA	NA	NA	NA	NA	0.965
MIMAT0004561	NA	NA	NA	NA	NA	NA	NA	NA	NA	NA	NA	NA	0.1628	NA	NA	NA	NA	NA	NA	1.30878	NA	NA	NA	NA	0.1814	0.3397	1.10005	NA	0.1823	0.146	NA	NA	NA	NA	0.408219	NA	NA	NA	NA	0.866832	NA	NA	NA	0.1808	0.1979	0.971627	NA	NA	0.964912
MIMAT0004560	1.07258	0.417953	2.00753	0.870137	1.29277	0.2677	1.71604	0.7525	NA	0.865467	0.46732	1.38647	1.21055	4.23594	NA	0.527631	1.11999	0.925476	2.42255	0.943591	1.10022	2.41705	0.873893	0.405938	1.98096	1.21878	NA	0.78556	2.44505	NA	1.49435	0.529319	1.96443	2.12442	1.71758	1.78969	1.15365	1.5825	3.13546	4.1772	2.59409	1.34416	1.02587	2.16082	0.1979	1.49875	1.32916	1.54644	1.82324
MIMAT0004567	0.633753	0.923	1.53001	0.634082	1.29278	1.39581	2.32171	3.94278	2.83975	1.70498	2.75218	3.18135	1.54193	1.81273	2.67155	1.02183	1.97589	1.59623	1.43648	1.19698	1.7171	1.71569	2.42532	1.09564	0.619084	1.51523	2.084	1.6651	2.12696	0.61589	0.831	1.78145	1.70382	2.17644	2.78357	0.812412	1.44082	0.769046	1.84636	2.10255	2.57122	0.3871	1.93073	0.848913	1.02073	1.16948	1.95371	1.47152	0.964912
MIMAT0004566	NA	NA	NA	0.3516	NA	NA	NA	NA	NA	NA	NA	NA	NA	NA	NA	NA	NA	NA	NA	NA	NA	NA	NA	NA	NA	NA	NA	NA	NA	NA	NA	NA	NA	NA	NA	NA	NA	NA	NA	NA	NA	NA	NA	NA	NA	NA	NA	NA	NA
MIMAT0004565	1.55113	0.534194	0.4622	0.634082	0.903037	1.86824	1.71605	0.7525	0.446	1.51064	0.968044	0.977166	1.54186	0.5875	2.5445	0.1981	0.910822	1.08691	0.962053	0.943515	0.937435	1.09923	1.29701	0.8578	1.22638	1.21879	0.652443	0.4456	1.05502	1.78654	1.02754	1.22015	1.19539	0.2141	1.1006	1.21615	0.3161	1.19592	0.959082	1.51262	0.131	0.69201	1.12712	0.341444	0.79505	0.65688	0.682585	0.1988	0.964912
MIMAT0004564	5.598	4.56899	4.39317	1.40912	4.8354	4.7274	5.42923	4.23273	3.52436	3.52095	1.22577	4.22938	4.52262	4.45017	3.17905	2.35668	5.618	5.12724	4.98724	6.82599	5.00517	4.18064	3.31483	4.65561	6.49556	5.3419	4.39306	2.90958	4.45164	1.99359	3.69408	2.84903	4.53934	3.49063	4.83941	4.80896	4.29401	4.80079	5.31106	3.84644	3.03991	5.87157	4.20688	6.42039	3.1359	3.4334	3.37537	2.75763	1.94711
MIMAT0004569	1.55115	3.14405	2.36558	2.87708	3.81248	2.02101	4.35228	2.14517	1.4913	4.87558	4.7348	3.2805	2.40638	1.91243	1.05254	2.39758	1.74287	2.12846	2.61349	2.66795	2.14785	4.70768	2.85699	2.0309	1.98094	4.40443	3.72217	7.04436	3.74349	1.91428	2.40163	2.31879	3.41625	3.1441	3.06296	3.27731	1.78642	4.64036	2.51597	3.57453	1.38733	4.18858	1.61933	2.66468	2.13119	3.3811	3.24333	4.62309	1.18227
MIMAT0004568	0.633753	1.64535	0.8116	2.82189	2.1635	0.86047	1.53827	4.60158	1.66616	4.7817	2.27053	1.70495	1.35229	0.587415	2.54451	1.21714	0.910745	1.36394	1.62568	0.943591	1.61306	2.28803	0.699952	0.981744	1.71266	1.97101	1.10005	5.44961	1.93697	2.73234	3.17766	2.8927	1.84004	2.49574	2.71336	1.62261	2.88145	1.69139	0.3057	1.51257	0.131	2.18247	2.36311	2.11706	2.872	1.10649	3.69472	2.08766	1.18225
MIMAT0015077	0.3514	0.5341	1.70732	0.8701	0.3674	NA	0.465597	0.7525	0.446	NA	0.2525	1.19629	0.563519	0.3234	1.38475	NA	NA	0.535746	NA	NA	NA	0.543004	0.699952	0.2172	0.342518	1.04405	NA	0.78556	0.621894	0.511979	0.1761	0.735394	1.19539	0.565633	0.2185	0.2498	0.794806	1.52484	NA	1.02121	0.361945	NA	2.08967	0.1808	0.3718	0.566109	0.381281	NA	1.18225
MIMAT0022693	NA	NA	NA	NA	0.3674	0.4935	NA	0.7525	NA	NA	NA	0.4037	NA	NA	0.6202	NA	NA	0.2926	NA	0.2445	0.2972	NA	NA	0.2172	NA	NA	NA	NA	NA	NA	NA	NA	NA	NA	NA	NA	0.3161	NA	NA	NA	NA	NA	NA	NA	NA	0.3655	NA	0.373494	NA
MIMAT0022938	NA	NA	0.4622	NA	NA	NA	NA	NA	NA	0.2696	0.2525	NA	NA	0.587415	NA	NA	NA	NA	NA	NA	0.54351	NA	NA	NA	NA	NA	NA	NA	NA	NA	NA	NA	NA	NA	NA	NA	NA	NA	0.3057	NA	NA	NA	NA	NA	NA	0.1324	NA	NA	0.3976
MIMAT0022695	0.3514	0.291682	0.8116	0.634082	0.3674	NA	0.465597	1.2445	NA	0.2696	0.46732	0.4037	0.309078	NA	NA	0.1981	0.3711	0.925496	0.962041	0.797949	0.2972	0.753091	0.873935	0.9816	0.48742	0.614462	NA	0.4456	0.489685	0.146	0.603389	NA	0.718139	0.713711	0.575758	NA	0.3161	0.435195	0.3057	0.2701	0.131	0.2065	0.1992	0.7378	0.371899	0.822771	NA	NA	0.3976
MIMAT0018932	NA	NA	NA	NA	0.659972	NA	NA	NA	NA	0.2696	0.2525	NA	NA	NA	NA	0.527672	NA	NA	NA	NA	NA	NA	0.2728	NA	0.1814	0.3397	NA	NA	NA	NA	0.333	0.2888	NA	0.2141	NA	0.2498	0.3161	NA	NA	NA	NA	0.2065	NA	NA	NA	0.1324	0.2032	0.1988	NA
MIMAT0015072	NA	NA	NA	0.3516	NA	NA	0.652	NA	NA	0.2696	NA	NA	NA	NA	NA	NA	NA	NA	NA	NA	NA	0.2969	NA	0.2172	0.1814	NA	NA	NA	NA	0.278573	NA	NA	NA	NA	0.575758	0.2498	NA	NA	0.3057	0.497518	NA	NA	NA	NA	NA	NA	NA	0.1988	0.709
MIMAT0022697	2.01212	2.62103	0.4622	1.40905	0.903	0.493416	1.33544	0.7525	NA	0.2696	NA	0.718783	0.563592	0.81058	NA	NA	1.61046	1.5962	2.26078	1.41241	1.61307	0.9365	0.874005	0.2172	1.38283	0.845206	NA	1.82097	0.958267	0.400007	0.72165	0.7354	0.4033	0.565539	1.85435	1.86649	1.8854	1.1959	1.12435	0.693921	0.651071	1.91447	NA	1.30372	1.02073	0.899132	0.3813	1.47151	0.708964
MIMAT0022696	1.55117	1.36065	2.81592	2.01268	4.50783	1.7853	3.49618	NA	1.82207	1.95482	2.38056	1.19629	1.81111	2.52981	0.6202	2.87391	1.74288	2.727	1.62566	2.70923	3.88038	3.83294	1.62376	1.97238	3.15457	3.66463	2.57411	3.77249	4.65046	NA	0.830979	NA	2.37649	2.57539	3.14527	3.1293	1.88534	2.35255	3.82935	5.31149	3.88594	2.5286	0.799189	2.39854	NA	3.39433	0.539793	2.62569	0.3976
MIMAT0003320	NA	NA	NA	NA	NA	NA	0.2515	NA	NA	NA	NA	NA	NA	NA	NA	NA	NA	NA	NA	NA	NA	NA	NA	NA	NA	NA	NA	NA	NA	NA	NA	NA	NA	NA	NA	NA	NA	NA	NA	NA	NA	NA	NA	NA	NA	NA	NA	NA	NA
MIMAT0003321	1.68096	1.5926	2.65223	1.55173	2.56804	2.6083	1.87433	NA	1.9629	2.02928	1.4442	1.7049	2.07935	3.46635	1.0526	2.22659	1.74283	2.33545	1.71172	2.3398	1.50089	4.04746	2.3683	2.0871	2.89362	2.8291	1.63056	2.08985	3.1616	0.616	1.11659	1.87154	1.84	1.623	3.86487	1.5312	2.22473	1.79259	1.8463	2.2347	1.334	3.06803	0.799193	2.11706	1.1216	2.53735	0.812522	3.06834	1.82324
MIMAT0003322	3.65341	5.44124	4.99833	5.69414	6.8451	5.75543	5.42921	6.59769	4.81614	7.05212	5.73878	7.01314	5.49096	5.76235	5.77382	5.31702	3.73571	4.29731	5.81196	6.11143	4.52123	6.40676	5.94428	4.7631	4.22384	5.67742	4.24145	5.61854	6.43319	4.61077	5.93928	5.70571	5.69023	4.94306	8.32023	4.894	4.84195	6.18625	3.89947	4.92819	5.70704	4.80365	4.43129	4.27989	5.4276	5.90944	5.43295	5.63704	5.37922
MIMAT0003323	NA	NA	0.8116	NA	0.659972	NA	0.965126	NA	NA	NA	1.44422	NA	NA	0.3234	NA	0.372254	1.11992	0.535746	0.463872	0.2445	0.5436	NA	0.700015	0.2172	0.487436	0.614462	0.465942	0.4456	0.1823	NA	NA	NA	0.4033	NA	0.861961	0.648122	NA	0.769088	0.3057	0.2701	0.651062	0.38711	NA	0.1808	NA	0.253664	NA	0.373494	0.3976
MIMAT0003324	NA	NA	NA	NA	NA	NA	NA	NA	NA	NA	NA	NA	NA	NA	NA	NA	NA	NA	NA	NA	NA	NA	NA	NA	NA	NA	NA	NA	NA	NA	NA	NA	NA	NA	NA	NA	NA	NA	NA	NA	0.131	NA	NA	NA	NA	NA	NA	NA	NA
MIMAT0003325	2.36088	NA	NA	NA	NA	NA	2.14662	NA	1.0613	NA	NA	NA	NA	NA	NA	NA	0.3711	NA	NA	NA	0.2972	NA	0.2728	NA	NA	1.2187	NA	NA	NA	NA	NA	NA	0.7181	NA	0.7259	NA	1.30439	0.3042	NA	NA	NA	NA	NA	0.1808	NA	0.4693	NA	NA	0.3976
MIMAT0003326	0.3514	0.1532	NA	NA	0.659972	NA	NA	0.7525	NA	0.2696	0.65426	0.4037	NA	0.3234	NA	0.1981	0.3711	NA	0.463872	NA	0.2972	NA	0.2728	NA	0.1814	0.3397	0.2517	NA	0.1823	NA	NA	NA	NA	NA	0.2185	NA	NA	0.1601	0.5577	NA	0.361955	NA	NA	0.341444	NA	NA	NA	NA	NA
MIMAT0003327	NA	1.15846	NA	NA	0.3674	NA	NA	NA	NA	0.496664	0.819679	NA	0.4419	NA	0.6202	0.1981	NA	NA	0.2505	2.48967	2.07139	0.2969	NA	0.572783	NA	0.845206	NA	NA	NA	NA	0.1761	NA	NA	NA	0.408219	1.32897	0.575236	NA	2.51596	NA	NA	2.27704	0.3741	0.1808	NA	0.1324	0.3813	0.1988	NA
MIMAT0003328	2.98096	2.45417	4.22863	2.7644	3.278	3.09511	2.42765	NA	2.91099	4.07223	9.06586	2.3777	2.37355	3.53047	2.89635	3.84763	5.61806	2.33547	2.56807	5.40469	2.28959	3.73736	4.75601	3.26452	6.15934	4.31104	5.77462	3.42902	5.89728	2.8001	2.63048	3.01638	2.8973	3.92987	3.36717	4.34208	3.1032	3.45614	4.57832	1.51261	3.00617	4.67052	3.61467	4.59886	2.35493	3.02004	4.58432	3.36589	0.965
MIMAT0003329	2.70394	2.23147	0.8116	3.07902	2.06696	0.860451	3.00836	1.2445	1.29221	0.496664	0.9681	1.70483	1.13416	1.17412	0.6202	NA	2.17648	1.5962	2.52122	2.96943	2.22044	1.09916	1.41432	1.47873	2.28847	2.53075	0.652407	3.2208	1.31138	2.63676	3.09241	2.49917	2.18512	2.0144	2.9454	2.46901	2.67558	2.21344	1.64336	2.8435	1.48856	2.83895	1.31054	2.16082	2.54862	1.99252	1.89626	2.36105	2.06119
MIMAT0016847	1.55112	1.64526	2.7364	3.03115	3.55216	2.34436	1.71605	5.32288	2.83974	3.23642	2.66788	2.95978	2.46999	2.25395	3.34078	3.87688	1.74288	0.743723	1.3317	2.62534	1.81418	3.76185	1.80653	1.63782	1.93111	3.07611	1.71678	3.27574	2.21332	2.80007	2.21252	3.83755	1.1954	1.89535	2.52129	2.65368	3.18325	2.35253	0.959035	1.4045	1.58318	2.44958	2.55698	1.58635	3.68997	2.06061	3.1481	2.81932	2.87713
MIMAT0016845	NA	NA	NA	NA	NA	NA	NA	NA	NA	NA	NA	NA	NA	NA	NA	NA	NA	NA	NA	NA	NA	NA	NA	NA	NA	NA	NA	NA	NA	NA	NA	NA	NA	NA	NA	NA	NA	NA	NA	NA	NA	NA	NA	NA	NA	NA	NA	NA	NA
MIMAT0018971	NA	NA	NA	NA	NA	NA	NA	NA	NA	NA	NA	NA	NA	NA	NA	NA	NA	NA	NA	NA	0.2972	NA	NA	NA	NA	NA	NA	NA	NA	NA	NA	NA	NA	NA	NA	NA	NA	NA	NA	NA	NA	NA	NA	NA	NA	0.1324	NA	NA	NA
MIMAT0018973	NA	NA	NA	NA	NA	NA	0.2515	NA	NA	NA	NA	NA	NA	NA	NA	NA	NA	NA	NA	NA	NA	NA	NA	NA	NA	0.3397	NA	NA	NA	NA	NA	NA	NA	NA	NA	NA	NA	NA	NA	NA	NA	NA	NA	NA	NA	NA	NA	NA	NA
MIMAT0018972	NA	NA	NA	NA	NA	0.2677	NA	NA	NA	NA	NA	NA	NA	NA	NA	NA	NA	NA	NA	NA	NA	NA	NA	NA	NA	NA	NA	NA	NA	NA	NA	NA	NA	NA	0.2185	NA	NA	0.1601	NA	NA	NA	NA	NA	NA	NA	NA	NA	NA	NA
MIMAT0018975	NA	NA	0.4622	0.634082	0.3674	NA	0.2515	1.90257	NA	0.692803	NA	0.4037	0.1628	0.5875	NA	NA	NA	NA	NA	0.2445	0.2972	0.543004	0.2728	NA	0.342518	NA	NA	0.4456	NA	NA	NA	0.2888	NA	0.2141	0.2185	0.2498	0.3161	0.1601	NA	0.2701	0.131	0.2065	0.1992	NA	0.527153	0.822842	0.539776	0.1988	0.3976
MIMAT0018974	NA	NA	NA	NA	NA	NA	NA	NA	NA	NA	NA	NA	NA	NA	NA	NA	NA	NA	NA	NA	NA	NA	NA	NA	NA	NA	NA	NA	NA	NA	NA	NA	NA	NA	NA	NA	NA	NA	NA	NA	NA	0.2065	NA	NA	NA	NA	NA	NA	NA
MIMAT0018976	NA	0.1532	0.4622	0.3516	0.659972	0.2677	0.4656	NA	NA	0.865437	0.4673	NA	0.1628	0.3234	NA	NA	NA	NA	NA	0.4534	NA	0.2969	0.2728	0.2172	0.1814	NA	NA	NA	0.1823	NA	0.1761	0.5293	0.4033	0.400494	NA	0.2498	0.575236	0.4352	NA	0.497518	0.131	NA	NA	0.341444	0.371899	0.365462	0.2032	NA	0.708964
MIMAT0003223	NA	NA	0.4622	NA	NA	NA	NA	NA	NA	NA	NA	NA	NA	NA	NA	NA	NA	NA	NA	NA	NA	NA	NA	NA	NA	NA	NA	NA	0.1823	NA	NA	NA	NA	NA	0.2185	NA	NA	NA	0.3057	NA	NA	NA	NA	NA	NA	NA	NA	NA	NA
MIMAT0015088	NA	NA	NA	NA	0.3674	NA	NA	NA	0.7863	NA	NA	NA	NA	NA	NA	NA	NA	NA	NA	NA	0.2972	NA	NA	0.2172	NA	NA	NA	NA	NA	NA	NA	NA	0.9764	NA	NA	NA	NA	0.3042	NA	NA	NA	NA	0.1992	0.1808	NA	NA	NA	NA	NA
MIMAT0015089	NA	NA	NA	NA	NA	NA	NA	NA	0.446	NA	NA	NA	NA	NA	NA	0.1981	NA	NA	NA	NA	NA	0.543004	NA	NA	0.1814	NA	NA	NA	0.1823	0.146	NA	NA	NA	NA	NA	0.2498	NA	NA	NA	NA	0.131	NA	NA	0.1808	NA	0.2536	NA	NA	NA
MIMAT0022844	NA	0.1532	NA	NA	NA	0.2677	0.2515	0.7525	NA	0.692834	2.27047	0.4037	0.1628	NA	NA	NA	NA	NA	NA	NA	0.2972	NA	NA	0.981668	0.1814	NA	NA	NA	0.1823	NA	NA	NA	NA	0.2141	NA	0.2498	NA	NA	0.3057	0.4976	3.74985	0.3871	NA	NA	NA	0.365462	NA	0.373494	0.3976
MIMAT0015087	0.3514	0.418028	NA	NA	NA	0.493416	NA	NA	0.786192	NA	NA	NA	NA	NA	NA	NA	NA	NA	NA	NA	5.60928	NA	NA	0.405938	4.14955	NA	NA	NA	NA	NA	NA	0.2888	2.46344	NA	0.2185	NA	NA	0.1601	1.27258	0.2701	NA	0.3871	NA	1.70921	NA	NA	NA	NA	NA
MIMAT0015084	0.3514	1.29645	1.32794	0.3516	0.659972	0.493416	1.09941	2.35275	1.06136	1.4026	0.968149	1.38652	0.5635	0.5875	1.6546	0.372254	NA	1.36394	0.463872	0.63603	0.54351	1.37818	0.2728	0.405938	0.851093	0.845173	NA	1.06052	1.23081	0.712816	0.721685	0.915694	0.4033	0.400494	1.10064	1.32896	0.985385	0.1601	0.772354	1.51257	0.361955	0.69201	0.374203	0.1808	1.38792	0.971652	0.682585	0.1988	0.709
MIMAT0015085	1.07254	1.83831	0.8116	2.437	3.65537	2.09176	1.87426	3.65985	2.09103	2.75561	2.53134	2.18636	2.8266	3.88969	1.88193	2.22658	0.6661	2.2008	1.33172	3.97932	3.31072	3.55308	1.02911	1.71115	1.98099	2.98234	1.33609	2.20749	4.41568	0.400007	1.27977	0.735394	2.18513	1.18905	4.4329	1.70857	1.97803	1.93227	2.1056	3.38849	5.2471	1.34416	1.87357	1.13863	1.21592	1.88402	1.04179	2.18474	0.964912
MIMAT0015082	NA	NA	NA	NA	0.659972	NA	NA	NA	NA	NA	NA	NA	NA	NA	NA	NA	NA	NA	NA	NA	NA	NA	NA	NA	NA	0.3397	NA	0.78556	NA	NA	NA	NA	NA	NA	0.408219	NA	NA	0.304195	NA	0.2701	NA	NA	NA	NA	NA	NA	NA	NA	NA
MIMAT0015083	NA	NA	NA	NA	NA	NA	NA	NA	NA	NA	0.2525	NA	NA	0.3234	NA	0.1981	NA	NA	NA	NA	NA	0.5429	NA	NA	NA	NA	NA	NA	NA	NA	NA	NA	NA	NA	0.2185	NA	NA	0.1601	NA	NA	0.362	NA	NA	NA	NA	NA	NA	0.373494	NA
MIMAT0022842	0.869788	1.42228	0.4622	1.25083	1.7312	1.2794	1.79737	NA	1.29223	0.496664	0.2525	0.4037	1.05333	1.81272	0.6202	1.30573	1.4648	0.535746	1.43649	1.50927	1.10021	1.61177	1.52283	1.2999	1.0509	1.97097	1.10001	1.96167	2.84737	NA	NA	0.915699	0.7181	0.713681	1.64398	1.62257	0.575236	0.955221	1.64334	2.62007	1.53666	0.943517	0.916933	1.04834	1.02073	1.80682	0.682585	1.61766	0.3976
MIMAT0015081	NA	NA	NA	NA	NA	NA	NA	NA	NA	NA	1.10269	NA	NA	NA	NA	NA	NA	NA	NA	NA	0.937422	NA	NA	NA	NA	0.3397	NA	NA	NA	NA	NA	NA	NA	NA	NA	0.2498	NA	NA	NA	NA	0.361955	0.2065	NA	NA	NA	NA	NA	NA	NA
MIMAT0005591	NA	NA	NA	NA	NA	NA	NA	NA	NA	NA	NA	NA	NA	0.3234	NA	NA	NA	NA	NA	NA	NA	NA	NA	NA	NA	NA	NA	NA	NA	NA	NA	NA	NA	NA	NA	NA	NA	NA	NA	0.2701	0.560981	NA	NA	NA	NA	NA	NA	NA	NA
MIMAT0019758	0.633753	NA	1.53001	1.2508	1.11105	0.86047	0.2515	3.94278	1.29236	1.15888	0.4673	1.96555	0.309078	0.81058	NA	NA	0.910745	NA	0.2505	0.635936	0.2972	NA	0.873935	0.572818	0.342518	1.37462	NA	0.7856	0.489685	0.2786	0.721668	0.5293	0.976396	0.565633	0.72585	0.462664	1.15365	1.19587	0.3057	0.497518	0.735866	0.943578	1.02587	0.737824	0.1979	1.0406	0.2032	0.373494	1.94715
MIMAT0019759	0.3514	NA	0.4622	NA	NA	0.2677	0.465597	NA	NA	0.2696	NA	NA	NA	NA	NA	NA	0.910822	NA	NA	NA	NA	NA	NA	0.2172	0.1814	0.3397	NA	NA	0.1823	0.146	NA	NA	0.4033	NA	NA	0.462664	NA	NA	0.557813	NA	NA	NA	0.374203	0.341444	NA	0.1324	NA	NA	0.3976
MIMAT0019756	0.8698	0.1532	0.4622	NA	NA	NA	0.2515	NA	NA	0.2696	0.654242	NA	NA	0.3234	NA	0.1981	0.3711	0.2926	NA	NA	NA	1.49966	0.2728	0.2172	0.342518	0.6145	NA	0.4456	NA	NA	NA	NA	0.718139	0.2141	NA	0.2498	NA	0.1601	NA	NA	NA	0.3871	NA	NA	NA	0.469271	NA	NA	NA
MIMAT0019757	NA	NA	NA	NA	NA	NA	NA	NA	NA	NA	0.2525	NA	NA	NA	NA	NA	NA	NA	NA	NA	NA	NA	NA	0.2172	NA	NA	NA	NA	NA	NA	NA	0.2888	NA	NA	NA	NA	NA	NA	NA	NA	NA	NA	NA	0.3415	NA	0.1324	NA	NA	NA
MIMAT0019754	NA	NA	NA	NA	NA	NA	NA	NA	NA	NA	NA	NA	NA	NA	NA	0.1981	NA	NA	NA	NA	NA	NA	NA	NA	NA	NA	NA	NA	NA	NA	NA	NA	NA	NA	NA	NA	NA	NA	NA	NA	NA	NA	NA	NA	NA	NA	NA	NA	NA
MIMAT0019755	NA	NA	NA	NA	NA	NA	NA	NA	NA	NA	NA	NA	NA	NA	NA	NA	NA	NA	NA	0.2445	NA	NA	NA	NA	NA	NA	NA	NA	NA	NA	NA	NA	NA	NA	NA	NA	NA	NA	NA	NA	NA	NA	0.1992	0.1808	NA	NA	NA	NA	NA
MIMAT0019752	NA	NA	NA	NA	NA	NA	NA	NA	NA	NA	NA	NA	NA	NA	NA	NA	NA	NA	NA	NA	NA	NA	NA	NA	NA	NA	NA	NA	NA	NA	NA	NA	NA	NA	NA	NA	NA	NA	NA	NA	NA	NA	NA	NA	NA	NA	NA	NA	NA
MIMAT0019753	NA	NA	0.4622	NA	NA	NA	NA	NA	NA	NA	NA	NA	NA	NA	NA	NA	NA	NA	NA	NA	NA	NA	NA	0.2172	NA	NA	NA	NA	NA	NA	NA	NA	NA	NA	NA	NA	NA	0.1601	NA	NA	0.131	NA	NA	NA	NA	NA	NA	0.1988	NA
MIMAT0019750	NA	NA	NA	NA	NA	NA	NA	NA	NA	0.2696	NA	NA	NA	NA	NA	NA	NA	NA	NA	NA	NA	NA	NA	NA	NA	NA	NA	NA	NA	NA	NA	NA	NA	NA	NA	NA	NA	NA	NA	NA	NA	NA	NA	NA	NA	NA	NA	NA	NA
MIMAT0019751	0.3514	NA	NA	NA	NA	NA	NA	NA	NA	NA	0.2525	NA	0.1628	NA	NA	NA	0.3711	NA	NA	NA	0.2972	NA	NA	NA	NA	NA	NA	NA	NA	NA	NA	NA	NA	NA	NA	NA	NA	0.1601	NA	NA	NA	0.2065	NA	NA	NA	0.1324	NA	NA	NA
MIMAT0005592	0.3514	0.291682	NA	NA	NA	NA	NA	1.61073	NA	0.865495	NA	NA	0.1628	NA	1.3848	NA	NA	NA	NA	0.2445	NA	0.5429	NA	NA	0.3425	0.6145	NA	0.4456	0.4897	NA	0.1761	NA	NA	NA	NA	0.2498	NA	0.3042	NA	0.2701	0.131	0.2065	NA	NA	NA	NA	NA	0.3735	0.3976
MIMAT0027533	NA	NA	NA	NA	NA	NA	NA	NA	NA	NA	0.4673	NA	0.1628	NA	NA	NA	NA	NA	NA	NA	NA	NA	NA	NA	NA	NA	NA	NA	NA	NA	NA	NA	NA	NA	NA	NA	NA	NA	NA	NA	NA	NA	NA	NA	NA	NA	NA	NA	NA
MIMAT0027532	NA	NA	NA	NA	NA	NA	NA	NA	NA	NA	NA	NA	NA	NA	NA	NA	NA	NA	NA	NA	NA	NA	NA	NA	NA	NA	NA	NA	NA	NA	NA	NA	NA	NA	NA	NA	NA	NA	NA	NA	NA	NA	NA	NA	NA	NA	NA	NA	NA
MIMAT0027539	NA	NA	NA	NA	NA	NA	NA	NA	NA	NA	NA	NA	0.1628	NA	0.6202	NA	NA	NA	NA	NA	NA	NA	NA	NA	NA	NA	NA	NA	NA	NA	NA	NA	NA	NA	NA	NA	NA	NA	NA	0.2701	NA	NA	NA	0.1808	NA	0.1324	NA	NA	NA
MIMAT0005593	NA	NA	NA	NA	NA	NA	NA	NA	NA	NA	0.2525	NA	NA	NA	NA	NA	NA	NA	NA	NA	0.2972	NA	NA	NA	NA	NA	NA	NA	NA	NA	NA	NA	NA	NA	NA	NA	NA	NA	NA	NA	NA	NA	NA	NA	NA	0.1324	NA	0.1988	NA
MIMAT0027538	NA	NA	NA	0.3516	NA	NA	NA	0.7525	NA	NA	NA	NA	NA	NA	NA	NA	NA	NA	NA	NA	NA	NA	NA	NA	NA	NA	NA	0.4456	NA	NA	NA	NA	NA	NA	NA	NA	NA	0.304195	NA	NA	NA	NA	NA	NA	NA	NA	NA	NA	NA
MIMAT0019972	NA	NA	NA	NA	NA	NA	NA	NA	NA	NA	NA	NA	NA	NA	NA	NA	NA	NA	NA	NA	NA	NA	NA	NA	NA	NA	NA	NA	NA	NA	NA	NA	NA	NA	NA	NA	NA	NA	NA	NA	NA	NA	NA	NA	NA	NA	NA	NA	NA
MIMAT0019973	NA	0.534125	0.4622	0.3516	1.59937	NA	0.465597	NA	NA	0.692803	0.4673	0.718783	NA	NA	NA	0.1981	NA	NA	0.463872	NA	0.54351	0.543004	0.2728	0.4059	0.1814	0.3397	NA	1.06049	0.1823	0.278573	0.1761	NA	NA	0.400494	1.10056	0.2498	0.3161	0.304195	NA	1.02115	0.361945	0.2065	0.530163	0.1808	0.1979	0.742227	0.682585	0.373494	0.964912
MIMAT0019970	0.869788	0.2916	NA	NA	0.3674	0.4935	0.2515	NA	0.446	0.2696	NA	NA	0.44188	NA	NA	0.1981	NA	0.2926	NA	NA	NA	NA	0.2728	NA	NA	0.6145	NA	NA	0.344127	NA	NA	NA	NA	0.2141	0.725945	0.2498	NA	0.1601	NA	NA	0.131	NA	0.67098	NA	NA	NA	0.381281	0.1988	NA
MIMAT0019971	NA	NA	NA	NA	NA	NA	NA	NA	NA	NA	NA	NA	NA	0.3234	NA	NA	NA	NA	NA	NA	NA	NA	NA	NA	NA	NA	NA	NA	NA	NA	NA	NA	NA	NA	NA	NA	NA	NA	NA	NA	NA	NA	NA	NA	NA	NA	NA	NA	NA
MIMAT0019976	NA	NA	NA	NA	NA	NA	NA	NA	NA	0.496664	NA	NA	NA	NA	NA	NA	NA	NA	0.2505	NA	NA	NA	NA	NA	NA	NA	NA	0.7856	NA	NA	NA	0.2888	NA	NA	NA	NA	NA	NA	NA	NA	NA	0.2065	NA	0.341444	NA	NA	NA	NA	NA
MIMAT0019977	NA	NA	NA	NA	NA	NA	NA	NA	NA	NA	NA	NA	NA	NA	NA	NA	NA	NA	NA	NA	NA	NA	NA	NA	NA	NA	NA	NA	NA	NA	NA	NA	NA	NA	NA	NA	NA	NA	NA	NA	NA	NA	NA	NA	NA	NA	NA	NA	NA
MIMAT0019974	NA	NA	NA	NA	NA	NA	NA	NA	0.446	NA	NA	NA	NA	NA	NA	NA	NA	NA	0.2505	NA	NA	NA	NA	NA	NA	NA	NA	NA	NA	NA	NA	NA	NA	NA	NA	NA	NA	NA	NA	NA	NA	NA	NA	0.1808	NA	0.2536	NA	NA	NA
MIMAT0019975	NA	NA	NA	NA	NA	NA	NA	NA	NA	NA	NA	NA	NA	NA	NA	NA	NA	NA	NA	NA	NA	NA	NA	NA	NA	NA	NA	NA	NA	NA	NA	NA	NA	NA	NA	NA	NA	NA	NA	NA	NA	NA	NA	NA	NA	NA	0.2032	NA	NA
MIMAT0019978	NA	NA	NA	0.3516	NA	NA	NA	NA	0.446	NA	NA	NA	NA	NA	NA	NA	NA	NA	NA	NA	0.2972	NA	NA	NA	NA	NA	NA	NA	NA	NA	0.333	NA	NA	NA	NA	NA	NA	NA	NA	NA	NA	NA	NA	NA	NA	NA	NA	NA	NA
MIMAT0019979	NA	NA	NA	NA	NA	NA	0.2515	0.7525	0.786192	0.496664	NA	0.718783	NA	NA	NA	NA	NA	NA	NA	0.2445	NA	0.2969	0.2728	0.405938	NA	NA	NA	NA	0.1823	NA	1.02748	NA	NA	NA	NA	NA	NA	NA	NA	NA	NA	NA	0.530163	0.1808	0.1979	0.1324	NA	0.529306	NA
MIMAT0005823	NA	NA	NA	NA	NA	NA	NA	NA	NA	NA	NA	NA	NA	NA	NA	NA	NA	NA	NA	NA	0.2972	NA	NA	NA	NA	NA	NA	NA	NA	NA	NA	NA	NA	NA	NA	NA	NA	NA	NA	NA	NA	NA	NA	NA	NA	NA	NA	NA	NA
MIMAT0005825	3.91316	4.60925	5.59094	5.25747	5.16192	4.76034	4.22583	6.80628	4.77863	5.42348	6.77139	6.01352	5.56925	6.32033	5.38622	4.1161	4.66394	4.63412	4.74353	4.40105	4.43229	4.10609	5.58636	4.4242	4.45294	5.47701	5.0699	3.88278	6.55391	2.50757	4.59134	3.39632	5.08303	1.83201	5.22086	4.99149	3.83059	3.82205	5.4343	7.00058	6.77055	3.45964	3.42889	3.85655	3.70636	4.99325	3.8691	4.6144	5.41183
MIMAT0005824	NA	0.1532	NA	0.3516	NA	NA	0.2515	NA	NA	NA	NA	NA	0.1628	0.5875	NA	0.1981	0.3711	NA	NA	NA	NA	NA	NA	NA	NA	0.3397	NA	NA	0.1823	0.146	0.1761	NA	NA	0.2141	0.2185	0.4626	0.3161	0.1601	NA	0.2701	0.560981	NA	NA	0.1808	0.1979	0.1324	0.381281	NA	NA
MIMAT0005827	NA	NA	NA	NA	NA	NA	NA	NA	NA	NA	NA	NA	NA	NA	NA	NA	NA	NA	NA	NA	NA	NA	NA	NA	NA	NA	NA	NA	NA	NA	NA	NA	NA	NA	NA	NA	NA	NA	NA	NA	NA	NA	NA	NA	NA	NA	NA	NA	NA
MIMAT0005826	0.3514	0.418028	NA	0.3516	NA	NA	0.465597	1.2445	NA	0.496664	NA	0.4037	NA	0.3234	1.05254	NA	NA	NA	NA	0.63603	NA	0.753181	NA	NA	NA	0.3397	0.2517	NA	NA	NA	0.1761	0.2888	NA	NA	NA	0.2498	NA	0.769088	NA	NA	0.251089	NA	0.3741	0.1808	NA	NA	0.2032	0.1988	NA
MIMAT0005829	NA	NA	NA	NA	NA	NA	NA	NA	NA	NA	NA	NA	NA	NA	NA	NA	NA	NA	NA	NA	NA	NA	NA	NA	NA	NA	NA	NA	NA	NA	NA	NA	NA	NA	NA	NA	NA	NA	NA	NA	NA	NA	NA	NA	NA	NA	NA	NA	NA
MIMAT0017392	NA	NA	NA	NA	NA	NA	NA	NA	0.446	NA	NA	NA	NA	NA	NA	NA	NA	NA	NA	NA	NA	NA	NA	NA	NA	NA	NA	NA	0.1823	NA	NA	NA	NA	NA	NA	NA	NA	NA	NA	NA	0.251089	NA	NA	NA	NA	NA	NA	0.1988	NA
MIMAT0005919	1.07259	0.1532	NA	0.634082	0.903037	0.688622	0.652	NA	0.7863	0.2696	0.6542	0.9771	0.4419	0.3234	0.6202	0.3723	1.12006	0.925476	0.4639	NA	0.7539	NA	0.873935	NA	0.1814	1.21881	NA	1.49024	0.621847	0.615911	0.333	0.2888	0.9764	0.2141	1.48457	0.2498	0.3161	0.1601	0.5577	0.2701	0.361955	0.547595	0.3741	NA	0.371899	0.2536	1.0418	0.67	1.5381
MIMAT0005918	NA	NA	NA	NA	NA	NA	NA	NA	NA	NA	NA	NA	NA	NA	NA	NA	NA	NA	NA	NA	NA	NA	NA	NA	NA	NA	NA	NA	NA	NA	NA	NA	NA	NA	NA	NA	NA	NA	NA	NA	0.131	NA	0.1992	NA	NA	NA	NA	NA	NA
MIMAT0005915	NA	NA	NA	NA	NA	NA	NA	NA	NA	NA	NA	NA	NA	NA	NA	NA	NA	NA	NA	NA	NA	NA	NA	NA	NA	NA	NA	NA	NA	NA	NA	NA	NA	NA	NA	NA	NA	NA	NA	NA	NA	NA	NA	NA	NA	NA	NA	NA	NA
MIMAT0005914	0.633753	0.741747	0.811703	0.870207	0.903037	1.60356	NA	2.1452	1.29229	1.51062	0.2525	1.55444	0.876741	0.3234	NA	0.913188	0.3711	1.79621	0.962065	1.76575	0.5436	0.5429	0.502128	1.39206	0.954484	0.3397	0.652407	4.83301	1.23085	1.2538	0.1761	0.915694	0.4033	0.847994	0.575864	1.2161	1.78639	0.955254	1.53011	1.28772	0.651099	0.38711	0.799189	0.341444	0.1979	1.16952	1.23958	1.12562	0.3976
MIMAT0005916	NA	0.291682	NA	NA	NA	NA	0.2515	NA	NA	NA	0.4673	NA	NA	NA	NA	0.3723	NA	0.2926	NA	0.2445	NA	NA	NA	NA	NA	NA	NA	NA	0.489685	NA	0.1761	NA	NA	0.2141	NA	0.2498	NA	NA	1.12439	NA	NA	NA	NA	0.1808	0.1979	0.566057	0.2032	0.529306	NA
MIMAT0005911	NA	NA	NA	NA	NA	NA	NA	NA	NA	NA	NA	NA	0.309078	NA	NA	NA	NA	NA	NA	NA	NA	NA	NA	NA	NA	NA	NA	NA	NA	NA	NA	NA	NA	NA	NA	NA	NA	NA	NA	NA	NA	NA	NA	NA	NA	NA	NA	NA	NA
MIMAT0018085	NA	NA	NA	NA	NA	NA	NA	NA	NA	NA	NA	NA	NA	NA	NA	NA	NA	NA	NA	NA	NA	NA	NA	NA	NA	NA	NA	NA	NA	NA	NA	NA	NA	NA	0.2185	NA	NA	0.1601	NA	NA	NA	NA	NA	NA	NA	NA	NA	NA	NA
MIMAT0018084	NA	NA	NA	NA	NA	NA	NA	NA	NA	NA	NA	NA	NA	NA	NA	NA	NA	NA	NA	NA	NA	NA	NA	NA	NA	NA	NA	NA	NA	NA	NA	NA	NA	NA	NA	NA	NA	NA	NA	NA	NA	NA	NA	NA	NA	NA	NA	NA	NA
MIMAT0018087	NA	NA	NA	NA	NA	NA	NA	NA	NA	NA	NA	NA	NA	NA	NA	NA	NA	NA	NA	NA	NA	NA	NA	NA	NA	NA	NA	NA	NA	NA	NA	NA	NA	NA	NA	NA	NA	NA	NA	NA	NA	NA	NA	NA	NA	NA	NA	NA	NA
MIMAT0018086	NA	0.291682	1.3279	NA	0.659972	0.2677	0.2515	NA	NA	NA	1.33915	NA	0.309078	NA	NA	NA	0.3711	0.5357	NA	0.4534	NA	0.2969	0.2728	NA	NA	0.3397	0.4659	NA	0.621834	NA	NA	0.5293	0.976396	0.2141	NA	NA	NA	0.1601	0.772256	1.51262	0.131	0.38711	0.3741	0.617345	0.1979	1.10651	NA	0.529306	NA
MIMAT0018081	NA	NA	NA	0.634	NA	NA	NA	NA	NA	NA	NA	NA	NA	NA	NA	NA	NA	NA	NA	0.2445	NA	NA	NA	NA	NA	0.3397	NA	NA	0.1823	NA	NA	NA	NA	NA	1.91815	NA	NA	NA	NA	NA	0.131	NA	NA	NA	NA	NA	NA	NA	0.3976
MIMAT0018080	NA	NA	NA	NA	NA	NA	NA	NA	NA	NA	NA	NA	NA	NA	NA	NA	NA	NA	NA	NA	0.2972	NA	NA	NA	NA	NA	NA	NA	NA	NA	NA	NA	NA	NA	NA	NA	NA	NA	NA	NA	NA	NA	0.1992	NA	NA	NA	NA	NA	NA
MIMAT0028233	NA	NA	NA	NA	NA	NA	NA	NA	NA	NA	NA	NA	NA	NA	NA	NA	NA	NA	NA	NA	NA	NA	NA	NA	NA	NA	NA	NA	NA	NA	NA	NA	NA	0.400494	NA	NA	NA	0.1601	NA	NA	NA	NA	0.1992	0.1808	NA	NA	NA	NA	NA
MIMAT0021019	NA	NA	NA	NA	NA	NA	NA	NA	NA	NA	NA	NA	NA	NA	NA	NA	NA	NA	NA	NA	NA	NA	NA	NA	NA	NA	NA	NA	NA	NA	NA	NA	NA	NA	NA	NA	NA	NA	NA	NA	0.561028	NA	NA	NA	NA	NA	NA	0.1988	NA
MIMAT0021017	2.01212	2.16088	1.53011	1.07297	1.73121	0.688622	0.817034	NA	NA	2.61752	1.22572	1.55444	1.13404	0.5875	0.6202	0.913206	0.9108	0.2926	1.21871	1.68528	0.937435	1.37813	0.502128	0.4059	1.77045	1.51527	1.10002	NA	1.77603	0.969765	2.63053	1.68534	0.718139	0.5656	NA	1.32898	0.794837	0.666141	0.3057	0.497518	1.27849	0.38711	1.4732	0.737824	0.794976	1.59367	2.11357	1.02447	2.35769
MIMAT0018089	NA	NA	NA	1.07295	0.3674	NA	NA	NA	NA	NA	NA	NA	NA	0.3234	NA	NA	0.3711	NA	0.4639	0.2445	NA	0.2969	NA	0.2172	0.1814	0.845173	NA	NA	NA	NA	NA	NA	NA	NA	NA	NA	NA	0.304195	0.5577	NA	NA	0.3871	NA	NA	NA	0.365462	NA	0.3735	NA
MIMAT0018088	NA	NA	NA	NA	NA	NA	NA	NA	NA	NA	NA	NA	NA	NA	NA	NA	NA	NA	NA	NA	NA	NA	NA	NA	NA	NA	NA	NA	NA	NA	NA	NA	NA	NA	NA	NA	NA	NA	NA	NA	NA	NA	NA	NA	NA	NA	NA	NA	NA
MIMAT0002882	NA	NA	NA	NA	NA	NA	NA	NA	0.446	NA	NA	NA	NA	NA	NA	NA	NA	NA	NA	NA	NA	NA	NA	NA	NA	NA	NA	NA	NA	NA	NA	NA	NA	NA	NA	NA	NA	NA	NA	NA	NA	NA	NA	NA	NA	NA	NA	NA	NA
MIMAT0020541	NA	NA	NA	NA	NA	NA	NA	NA	NA	NA	NA	NA	NA	NA	NA	NA	NA	NA	NA	NA	NA	NA	NA	NA	NA	NA	NA	NA	NA	NA	NA	NA	NA	NA	NA	NA	NA	NA	NA	NA	NA	NA	NA	NA	NA	NA	NA	NA	NA
MIMAT0002873	0.6337	0.741687	1.86519	0.3516	1.96348	2.74628	NA	0.7525	NA	1.61108	1.63402	1.19629	1.41828	1.9124	1.6546	1.4681	0.910745	1.97189	1.33166	0.63603	0.54351	1.09916	0.5022	0.981656	1.45509	1.21878	1.10004	0.78556	1.88528	0.615896	0.474542	0.529319	0.4033	0.400494	0.5757	0.959881	0.3161	0.555289	1.40712	1.02109	0.251089	1.05462	0.67098	1.87594	0.912276	0.566057	0.539793	1.3089	0.3976
MIMAT0002872	2.36091	1.00577	4.2286	1.80054	3.09424	4.27451	0.965126	2.84039	1.4913	3.59641	4.62728	3.28056	3.18981	4.17705	2.78835	2.3567	2.17648	2.82181	3.22394	3.16031	2.47909	1.61177	2.63319	1.71123	2.43868	2.59557	2.37651	1.06052	4.28214	1.04617	1.42636	1.68532	2.18512	1.18909	1.30535	1.70858	1.78641	1.79257	2.68427	2.03165	1.43884	1.91445	1.22174	2.20325	0.794949	2.18782	0.539793	2.48045	1.68767
MIMAT0002871	6.7327	6.7241	7.98862	7.50354	8.90628	9.0751	6.25221	9.58849	5.53253	7.44981	10.4221	9.11556	8.86909	9.60607	7.529	7.99487	7.68694	7.5219	7.47042	7.90429	7.41576	7.41568	7.50532	7.18245	7.3791	7.97209	7.74834	7.20517	9.39872	5.81728	6.85978	7.25134	7.94504	6.49131	7.05633	6.92152	5.83528	6.59105	8.12157	7.97149	7.10335	7.0539	6.76888	7.37877	6.16691	7.37267	6.39813	8.12154	5.34581
MIMAT0002870	NA	NA	0.4622	NA	NA	NA	0.2515	NA	NA	NA	0.2525	0.4037	NA	NA	NA	NA	NA	0.7437	NA	NA	0.2972	0.5429	NA	NA	0.619084	0.3397	NA	NA	0.4897	0.278573	0.4745	0.735411	NA	0.970828	1.5665	NA	0.5752	NA	NA	0.497518	0.651144	0.2065	0.374203	0.1808	NA	0.365462	NA	NA	NA
MIMAT0002877	NA	NA	NA	NA	NA	NA	NA	NA	NA	NA	NA	NA	0.1628	NA	NA	NA	NA	NA	NA	NA	2.69836	NA	NA	0.405938	1.05091	0.3397	NA	NA	0.1823	0.146	NA	0.529319	1.84002	NA	NA	NA	NA	0.435195	0.3057	NA	NA	NA	0.530163	0.3415	NA	NA	NA	NA	NA
MIMAT0002876	5.03194	4.35667	5.17462	4.8788	5.99187	4.82402	5.72248	7.27018	3.91929	4.88563	3.47714	4.87831	5.26298	5.72168	4.2269	4.16426	5.17812	4.28067	4.30543	6.92356	5.4063	5.79112	4.5014	4.77171	6.34915	6.03958	5.76958	6.43903	6.3758	2.45245	4.91062	3.83758	5.42379	4.19231	7.71826	5.60396	4.01677	5.4462	5.62573	6.48784	5.14226	5.68999	5.46671	5.92324	4.53579	5.55273	4.49042	5.91654	3.80848
MIMAT0002875	0.3514	1.36066	0.8116	1.55175	0.659972	2.34439	0.651991	4.99138	0.786192	2.23222	0.2525	1.70491	1.3524	1.17401	0.6202	0.1981	0.6661	0.743762	1.53413	2.93499	1.37927	1.71575	0.502128	NA	2.66885	NA	0.652407	NA	2.37189	0.2786	0.932643	0.915708	0.976396	0.2141	1.78757	1.53123	0.3161	0.435195	1.40708	2.03167	1.22084	0.823279	0.799214	1.767	1.74497	0.3655	0.539776	1.12568	NA
MIMAT0002874	2.87647	2.54003	4.00933	0.634	3.92695	2.70169	2.66276	1.2445	3.10568	2.35315	2.57832	2.08019	2.15873	3.05101	2.67159	2.55039	2.26723	2.91076	2.56804	3.52673	3.09587	3.40535	2.58399	3.18943	4.0245	3.24723	4.67718	5.93242	3.57434	0.712836	1.84647	0.915699	3.27914	4.03222	2.29975	3.16014	2.83263	2.05957	3.56742	3.35981	3.13665	3.06797	3.63201	4.40338	2.68679	2.77872	2.11352	5.62406	3.2096
MIMAT0002879	0.3514	0.1532	NA	NA	NA	NA	NA	NA	0.446	NA	NA	NA	NA	NA	NA	NA	NA	NA	NA	NA	2.07142	NA	NA	NA	1.22638	NA	NA	NA	NA	NA	NA	0.2888	2.07896	NA	0.2185	NA	NA	0.4352	NA	NA	NA	NA	NA	0.1808	0.1979	0.2536	NA	NA	NA
MIMAT0002878	NA	0.922984	0.8116	0.3516	0.3674	0.493416	NA	NA	1.66616	NA	0.2525	1.19629	0.3091	NA	0.6202	NA	NA	NA	0.2505	NA	4.63187	NA	NA	1.09568	2.16461	NA	NA	0.4456	NA	NA	0.1761	0.5293	3.41623	0.400494	0.7259	NA	NA	0.865136	0.3057	0.2701	0.131	NA	0.374203	0.737799	NA	NA	0.539793	NA	NA
MIMAT0027409	NA	0.1532	0.4622	NA	NA	NA	NA	NA	NA	NA	0.4673	NA	NA	NA	NA	NA	NA	0.2926	NA	0.2445	NA	NA	NA	NA	0.1814	NA	NA	NA	0.3442	NA	NA	NA	NA	NA	NA	NA	NA	NA	NA	0.2701	NA	NA	NA	NA	NA	NA	NA	NA	NA
MIMAT0027408	NA	NA	NA	0.3516	0.659972	NA	NA	NA	NA	NA	0.8196	NA	NA	0.587415	NA	NA	NA	NA	NA	0.4534	NA	NA	NA	NA	0.1814	NA	NA	0.4456	NA	NA	NA	NA	NA	NA	NA	NA	0.3161	0.3042	0.3057	NA	NA	NA	NA	NA	NA	0.1324	NA	NA	NA
MIMAT0027403	NA	0.1532	NA	NA	NA	NA	NA	NA	NA	NA	NA	NA	0.1628	NA	NA	0.1981	NA	NA	NA	NA	NA	0.2969	NA	NA	0.1814	NA	NA	NA	NA	NA	NA	NA	0.718139	NA	NA	NA	NA	NA	NA	0.2701	0.131	NA	NA	NA	NA	0.1324	NA	NA	NA
MIMAT0027402	NA	NA	NA	NA	NA	0.2677	0.2515	NA	NA	NA	0.2525	NA	0.4419	NA	NA	NA	NA	NA	NA	0.2445	NA	0.2969	0.502128	0.572818	NA	NA	NA	NA	NA	NA	0.1761	NA	NA	NA	0.2185	NA	NA	NA	0.557813	NA	NA	NA	NA	NA	NA	NA	NA	0.1988	NA
MIMAT0027401	NA	0.5341	NA	NA	NA	NA	0.4656	NA	NA	0.692803	0.4673	NA	0.1628	NA	NA	NA	NA	0.535746	NA	1.07588	0.54351	0.5429	NA	NA	0.342518	0.3397	NA	0.78556	0.742948	NA	NA	NA	NA	NA	NA	NA	NA	0.555289	0.3057	0.2701	NA	NA	0.1992	NA	NA	0.1324	NA	0.5294	NA
MIMAT0027400	0.3514	0.1532	NA	NA	NA	NA	NA	NA	NA	NA	NA	NA	NA	NA	NA	NA	NA	NA	NA	0.2445	0.2972	0.2969	NA	NA	NA	NA	NA	NA	NA	NA	NA	NA	NA	NA	NA	NA	NA	NA	NA	NA	NA	NA	NA	NA	NA	0.1324	NA	NA	NA
MIMAT0027407	NA	0.1532	0.4622	NA	0.3674	NA	NA	NA	NA	NA	NA	NA	NA	NA	NA	NA	NA	NA	NA	NA	0.2972	NA	NA	NA	NA	NA	NA	NA	NA	NA	NA	NA	NA	NA	NA	NA	0.575236	NA	NA	0.2701	NA	NA	NA	NA	NA	NA	0.2032	NA	0.3976
MIMAT0027406	NA	0.1532	NA	NA	NA	NA	NA	NA	NA	NA	NA	NA	NA	NA	NA	NA	NA	NA	NA	NA	NA	NA	NA	NA	NA	NA	NA	NA	NA	NA	NA	NA	NA	NA	NA	NA	NA	NA	NA	NA	NA	NA	NA	NA	NA	NA	NA	NA	NA
MIMAT0027405	NA	NA	NA	NA	NA	NA	NA	NA	NA	NA	NA	NA	NA	NA	NA	NA	NA	NA	NA	NA	NA	NA	NA	NA	NA	NA	NA	NA	NA	NA	NA	NA	NA	NA	NA	NA	NA	NA	NA	NA	NA	NA	NA	NA	NA	NA	NA	NA	NA
MIMAT0027404	NA	NA	NA	NA	NA	NA	NA	NA	NA	NA	NA	NA	NA	NA	NA	NA	NA	NA	NA	NA	NA	NA	NA	NA	NA	NA	NA	NA	NA	NA	NA	NA	NA	NA	NA	NA	NA	NA	NA	NA	NA	NA	NA	NA	NA	NA	NA	NA	NA
MIMAT0016880	NA	NA	NA	NA	NA	NA	NA	NA	NA	NA	NA	NA	NA	NA	NA	NA	NA	NA	NA	NA	NA	NA	NA	NA	NA	NA	NA	NA	NA	NA	NA	NA	NA	NA	NA	NA	NA	NA	NA	NA	NA	NA	NA	NA	NA	NA	NA	NA	NA
MIMAT0027623	NA	NA	NA	NA	NA	NA	NA	NA	NA	NA	0.4673	NA	NA	NA	NA	NA	NA	NA	NA	NA	NA	NA	NA	NA	NA	NA	0.2517	NA	NA	NA	NA	NA	NA	NA	NA	0.2498	NA	NA	NA	NA	NA	NA	NA	NA	NA	NA	NA	NA	NA
MIMAT0027622	NA	0.741627	NA	NA	NA	NA	0.2515	NA	NA	NA	1.54226	NA	NA	NA	NA	0.795746	1.11992	NA	0.2505	0.798033	NA	0.2969	NA	NA	1.05091	NA	NA	NA	0.4897	NA	0.721685	NA	NA	NA	NA	0.4626	NA	NA	NA	NA	NA	0.692018	0.374203	NA	NA	0.2536	1.77402	NA	NA
MIMAT0027621	NA	NA	NA	NA	NA	NA	NA	NA	NA	0.2696	NA	0.4037	0.1628	NA	NA	NA	NA	NA	NA	NA	NA	0.2969	NA	NA	NA	0.3397	NA	NA	0.1823	NA	NA	NA	NA	NA	NA	NA	NA	NA	NA	0.2701	NA	NA	NA	NA	0.1979	NA	NA	NA	NA
MIMAT0027620	NA	NA	NA	NA	0.3674	NA	NA	NA	NA	NA	NA	NA	NA	NA	NA	NA	NA	NA	NA	NA	NA	NA	NA	NA	NA	NA	NA	NA	NA	NA	NA	NA	0.4033	NA	NA	NA	NA	0.1601	NA	NA	NA	NA	NA	NA	NA	NA	NA	NA	NA
MIMAT0027627	NA	NA	NA	NA	NA	NA	NA	NA	NA	NA	NA	NA	NA	NA	NA	NA	NA	NA	NA	NA	NA	NA	NA	NA	NA	NA	NA	NA	NA	NA	NA	NA	NA	NA	NA	NA	NA	NA	NA	NA	NA	NA	NA	NA	NA	NA	NA	NA	NA
MIMAT0027626	NA	NA	NA	0.3516	NA	NA	NA	NA	NA	NA	0.2525	NA	NA	NA	NA	NA	NA	NA	NA	0.2445	NA	NA	NA	NA	NA	NA	NA	NA	NA	NA	NA	NA	NA	NA	NA	NA	NA	NA	NA	NA	NA	NA	NA	NA	NA	NA	NA	NA	NA
MIMAT0027625	NA	0.1532	NA	NA	NA	NA	NA	NA	NA	NA	NA	NA	NA	NA	NA	NA	NA	NA	NA	NA	NA	NA	NA	NA	NA	NA	NA	NA	NA	0.146	NA	NA	0.4033	NA	NA	NA	NA	NA	NA	NA	NA	NA	NA	NA	0.1979	NA	NA	NA	NA
MIMAT0027624	NA	NA	NA	NA	NA	NA	NA	NA	NA	NA	NA	NA	NA	NA	NA	NA	NA	NA	NA	NA	NA	NA	NA	NA	NA	NA	NA	NA	NA	NA	NA	NA	NA	NA	NA	NA	NA	NA	NA	NA	NA	NA	NA	NA	NA	NA	NA	NA	NA
MIMAT0027629	NA	NA	NA	NA	NA	NA	NA	NA	NA	NA	NA	NA	NA	NA	NA	NA	NA	NA	NA	NA	NA	NA	NA	NA	NA	NA	NA	NA	NA	NA	NA	NA	NA	NA	NA	NA	NA	NA	NA	NA	NA	NA	NA	NA	NA	0.2536	NA	NA	NA
MIMAT0027628	NA	NA	NA	NA	NA	NA	NA	NA	NA	NA	NA	0.4037	NA	NA	NA	NA	NA	NA	NA	NA	NA	NA	NA	NA	NA	NA	NA	NA	NA	NA	NA	NA	NA	NA	NA	NA	NA	NA	NA	NA	NA	NA	NA	NA	NA	NA	NA	NA	NA
MIMAT0027537	0.3514	NA	NA	NA	NA	0.2677	0.2515	NA	NA	NA	NA	0.4037	0.1628	0.3234	NA	0.1981	NA	NA	0.4639	0.2445	NA	NA	NA	NA	NA	NA	NA	NA	0.489619	NA	NA	0.2888	NA	0.2141	NA	NA	0.575236	NA	NA	0.2701	NA	NA	NA	NA	NA	NA	NA	NA	NA
MIMAT0027536	NA	0.291682	NA	NA	0.3674	NA	0.2515	NA	NA	0.2696	0.2525	NA	NA	NA	NA	NA	NA	NA	NA	0.453506	NA	NA	NA	0.2172	0.4874	NA	0.465942	0.4456	0.1823	NA	NA	0.2888	NA	NA	0.408219	NA	0.575236	0.1601	NA	NA	0.361945	0.2065	NA	NA	NA	NA	NA	NA	NA
MIMAT0027535	NA	NA	NA	NA	NA	NA	NA	NA	NA	0.2696	NA	NA	NA	NA	NA	NA	NA	0.2926	0.2505	NA	NA	NA	NA	NA	NA	NA	NA	NA	NA	NA	NA	NA	NA	NA	NA	NA	NA	NA	NA	NA	0.131	NA	NA	NA	NA	NA	NA	NA	NA
MIMAT0027534	NA	NA	NA	NA	NA	NA	NA	NA	NA	NA	NA	NA	NA	NA	NA	NA	NA	NA	NA	NA	NA	NA	NA	NA	NA	NA	NA	NA	NA	NA	NA	NA	NA	NA	NA	NA	NA	NA	0.3057	0.2701	NA	NA	NA	NA	NA	NA	NA	NA	NA
MIMAT0000259	13.094	13.664	14.6451	14.2033	14.575	12.562	13.3852	9.08728	14.1587	13.9186	12.1168	13.5929	14.69	15.4246	13.4857	12.9537	13.7733	14.1994	15.316	12.6898	13.0672	15.1713	13.6174	13.9864	14.3815	12.93	13.387	13.8988	14.7751	10.8924	15.7426	12.4836	14.69	15.9796	14.3601	13.9584	13.6383	14.0069	15.9214	16.5251	15.3291	13.0993	15.619	14.2726	12.6272	14.8692	14.378	15.0196	15.4993
MIMAT0000258	4.99498	7.38256	4.63164	5.90146	5.52202	6.71424	6.18584	5.11055	6.34106	6.65036	4.18685	5.70074	7.24139	5.29276	5.90896	4.35279	6.01483	6.40325	4.5233	6.19375	5.3748	5.59368	4.78895	6.01159	6.107	5.97405	5.51683	2.68441	6.72715	4.89526	5.15098	5.95797	4.87679	4.58746	4.83114	6.45557	5.65062	5.69522	5.61881	6.6768	5.49833	5.88292	6.40065	5.28245	6.12193	7.0028	5.08633	4.80184	6.61161
MIMAT0027531	NA	0.1532	0.4622	NA	NA	NA	NA	NA	0.7863	NA	0.8196	NA	0.3091	0.5875	NA	NA	0.3711	0.2926	NA	0.636	0.2972	1.2454	0.2728	0.2172	0.1814	NA	0.8175	NA	0.6219	NA	0.333	NA	0.4033	0.9709	NA	NA	NA	1.0399	NA	0.8668	0.4649	0.3871	0.917	NA	NA	NA	0.5398	0.5294	0.709
MIMAT0027530	NA	NA	NA	NA	0.3674	0.493416	NA	1.24453	NA	0.4967	0.2525	NA	NA	NA	NA	NA	0.3711	NA	0.2505	NA	0.54351	NA	0.2728	0.405938	0.1814	NA	0.2517	NA	NA	NA	0.474542	NA	NA	NA	0.2185	NA	0.3161	0.666141	NA	0.866825	0.131	NA	0.3741	NA	NA	0.1324	NA	0.1988	NA
MIMAT0000255	8.11553	7.92632	8.64703	5.84718	8.18055	8.59251	7.83775	5.27262	7.29262	7.76124	5.63158	8.59067	9.22994	7.97477	7.49077	8.82039	8.66272	7.78718	8.20602	8.63931	7.52554	8.37818	7.12127	9.61352	9.35057	8.69105	8.53125	5.21678	8.87058	5.66211	7.46569	7.11726	8.64016	5.7105	7.90695	7.87896	7.47855	8.17248	9.8681	6.97246	5.71749	8.06262	8.40296	8.16425	7.22787	8.00146	7.05737	6.56952	6.29335
MIMAT0000254	13.5859	12.3416	10.7597	13.161	13.3226	13.3003	12.9228	13.2064	12.4481	8.51783	10.6355	11.8767	12.097	13.359	11.5558	12.4966	10.533	11.7582	11.1541	13.9005	11.2789	10.4926	10.9563	12.1094	12.3501	11.9122	10.6469	14.1361	12.0339	9.48023	12.4877	10.9326	9.90999	12.7857	13.8033	13.1267	11.2567	10.3484	9.95813	12.1424	14.8588	12.0806	12.5666	12.1883	11.5077	11.0421	12.1219	14.3424	14.0516
MIMAT0000257	8.77883	9.64143	9.39956	8.59118	9.17012	10.6379	10.2295	7.91884	9.74455	10.5227	8.82428	10.1235	9.69739	8.11085	9.25164	8.38435	9.87573	9.08619	10.3717	10.2996	9.39234	10.3084	9.26758	8.81328	10.3956	8.98212	9.23337	9.02116	10.2382	7.98249	10.366	8.39736	9.61778	9.48275	9.00932	9.50033	9.66669	8.19167	9.86774	9.99711	8.74629	9.94359	9.01651	9.65081	9.17329	10.1807	9.71135	8.97599	9.90402
MIMAT0000256	10.8149	11.7394	11.4866	10.9351	11.2793	12.8639	11.9848	11.5153	11.5763	12.2202	11.2314	12.4	11.932	10.1154	11.8505	10.3508	11.7047	11.3013	11.9635	12.1359	11.3835	12.1779	11.3181	11.2473	12.2269	11.3718	11.1657	10.8764	12.2444	10.6188	12.0634	10.8549	11.7899	11.0551	9.99065	11.5516	11.2094	10.413	11.9772	11.6113	10.72	12.2729	10.6535	11.7692	11.2617	11.8804	11.5309	11.0725	11.04
MIMAT0000251	NA	NA	NA	NA	NA	NA	NA	NA	NA	NA	NA	NA	NA	NA	NA	NA	NA	NA	NA	NA	NA	NA	NA	NA	NA	NA	NA	NA	NA	NA	NA	NA	NA	NA	NA	NA	NA	NA	NA	NA	NA	NA	NA	NA	NA	NA	NA	NA	NA
MIMAT0000250	4.51021	4.15378	6.19221	5.38675	4.48929	7.14674	5.6856	8.71901	4.50703	4.34449	4.72437	6.77025	5.88144	5.62215	5.68621	3.96112	4.79165	5.57787	7.88344	5.33382	6.04378	4.33565	4.78897	6.27939	6.17548	5.36069	5.99753	5.99923	5.19244	5.30981	4.51966	4.91894	5.15009	4.38136	3.76429	5.31297	4.44766	5.00966	4.72712	3.00022	4.40275	5.14846	4.15985	5.08087	4.79454	5.73822	4.70636	3.93861	4.04876
MIMAT0000253	14.139	14.344	12.8748	13.6404	14.1714	14.5061	13.9628	13.2456	13.5052	14.8081	13.5177	15.1473	14.5171	14.5767	14.1188	11.3669	14.1779	14.2011	13.9271	15.384	15.2553	14.3354	14.9066	13.6755	14.5334	15.3385	14.0229	15.3043	15.1289	14.3273	13.8112	13.9682	13.7561	14.3202	15.06	14.4671	14.3466	13.7574	14.4585	15.2555	15.0814	14.0294	13.8396	14.7399	14.258	14.9391	14.9912	17.6447	15.3111
MIMAT0000252	1.07259	0.291682	1.53017	4.1786	1.96351	0.2677	0.817034	NA	1.49123	1.40264	3.23493	0.4037	0.1628	1.70566	1.05254	0.527672	1.61044	0.743762	1.62567	0.797949	1.61301	2.06999	0.873893	0.981744	0.619103	0.845206	1.87514	0.4456	0.621774	0.889103	1.73846	1.78149	2.18514	1.6229	4.34278	0.959881	0.794806	1.40214	1.53008	0.693921	1.90945	1.15774	1.39414	1.37978	1.21597	1.49879	1.77403	1.12562	2.67687
MIMAT0005577	0.8698	1.22896	1.3279	1.07297	1.73118	0.2677	0.817041	3.87708	1.06136	1.79312	3.34763	2.0802	1.05335	2.328	0.6202	1.54288	1.11997	0.5357	0.6497	2.78847	1.37929	2.1463	1.1693	0.4059	2.16465	1.37458	0.8175	1.29133	1.3114	0.146	1.73838	0.2888	1.38549	0.5656	0.986195	0.959898	1.56536	0.955221	1.74842	2.66764	2.76523	0.5476	1.02585	0.737757	0.371899	1.16953	0.931715	1.30896	NA
MIMAT0005576	NA	NA	NA	NA	NA	NA	NA	NA	NA	0.2696	NA	NA	NA	NA	NA	NA	NA	NA	NA	NA	NA	NA	NA	NA	NA	NA	NA	NA	NA	NA	NA	NA	NA	NA	NA	NA	NA	NA	NA	NA	0.131	NA	0.1992	NA	NA	NA	NA	NA	NA
MIMAT0005573	NA	NA	NA	NA	NA	NA	NA	NA	NA	NA	NA	NA	NA	NA	NA	NA	NA	NA	NA	0.2445	NA	NA	NA	NA	NA	NA	NA	NA	NA	NA	NA	NA	NA	NA	NA	NA	NA	NA	NA	NA	NA	NA	NA	NA	NA	NA	NA	NA	NA
MIMAT0005572	NA	NA	NA	NA	NA	NA	NA	NA	NA	NA	NA	NA	NA	NA	NA	NA	NA	NA	NA	0.635936	NA	NA	NA	NA	NA	NA	NA	NA	NA	NA	NA	NA	NA	NA	NA	NA	NA	NA	NA	NA	NA	NA	NA	NA	NA	NA	NA	NA	NA
MIMAT0000439	0.6337	0.923037	1.09283	1.68148	0.3674	0.493416	0.817034	NA	0.446	1.01961	NA	0.977235	2.11955	3.09414	NA	1.12275	0.3711	1.08691	0.649715	1.41246	1.10016	0.936517	NA	0.405938	1.52393	1.04405	0.465942	0.4456	2.12694	0.146	0.333024	0.529319	1.19537	0.713711	1.30529	1.43364	0.985358	2.80424	0.5577	1.02115	3.45697	1.65734	0.799266	1.52077	0.1979	1.84594	0.2032	NA	2.81341
MIMAT0019028	NA	NA	NA	NA	NA	NA	NA	NA	NA	NA	NA	NA	NA	NA	NA	NA	NA	NA	NA	NA	NA	NA	NA	NA	0.1814	NA	NA	NA	NA	NA	NA	NA	NA	NA	NA	NA	NA	NA	NA	NA	NA	NA	NA	NA	NA	NA	NA	NA	NA
MIMAT0019029	NA	0.1532	NA	NA	NA	NA	NA	NA	NA	NA	NA	NA	NA	NA	NA	NA	NA	0.2926	NA	NA	NA	0.2969	NA	NA	NA	NA	0.2517	NA	0.1823	NA	NA	NA	NA	NA	NA	NA	NA	NA	NA	NA	NA	NA	NA	NA	0.371899	NA	NA	0.1988	NA
MIMAT0004777	NA	NA	NA	NA	NA	NA	NA	NA	NA	NA	NA	NA	NA	NA	NA	NA	NA	NA	NA	NA	0.2972	NA	NA	NA	0.1814	NA	NA	NA	NA	NA	NA	NA	NA	NA	NA	NA	NA	NA	NA	NA	NA	NA	NA	NA	NA	NA	NA	NA	NA
MIMAT0019024	NA	NA	NA	NA	NA	NA	NA	NA	NA	NA	NA	NA	NA	NA	NA	NA	NA	NA	NA	NA	NA	NA	NA	NA	0.342518	NA	NA	NA	NA	NA	NA	0.2888	NA	NA	NA	NA	NA	0.1601	NA	NA	NA	NA	NA	NA	NA	NA	NA	NA	NA
MIMAT0019025	NA	NA	NA	NA	NA	NA	NA	NA	0.786192	NA	NA	NA	NA	NA	NA	NA	NA	NA	NA	NA	NA	NA	NA	NA	NA	NA	NA	NA	NA	NA	NA	NA	NA	NA	NA	NA	NA	NA	NA	NA	NA	NA	NA	NA	NA	NA	NA	NA	NA
MIMAT0019026	0.3514	NA	NA	0.870207	0.3674	0.2677	NA	1.2445	0.446	0.496664	1.22577	1.55453	0.44188	0.3234	NA	0.372254	NA	0.5357	NA	1.19701	0.2972	1.81286	0.2728	0.722349	0.487436	2.15429	0.2517	NA	0.1823	NA	0.333024	0.735411	NA	0.2141	0.2185	0.462664	0.794806	1.12	NA	0.2701	0.131	0.69201	0.1992	0.341444	0.371899	1.59372	1.56866	NA	1.9471
MIMAT0019027	NA	0.2916	NA	0.3516	NA	NA	0.2515	0.7525	NA	NA	NA	NA	NA	NA	0.6202	NA	0.3711	0.2926	0.2505	NA	NA	NA	NA	NA	NA	0.3397	0.2517	NA	0.1823	0.146	NA	0.2888	NA	NA	NA	NA	NA	0.1601	NA	NA	NA	0.2065	NA	0.1808	NA	NA	0.2032	NA	NA
MIMAT0019021	NA	NA	NA	NA	NA	NA	NA	NA	NA	NA	NA	NA	NA	NA	NA	NA	NA	NA	NA	NA	NA	NA	NA	NA	NA	0.3397	NA	NA	NA	NA	0.1761	NA	NA	NA	NA	0.2498	NA	0.1601	NA	NA	NA	NA	NA	NA	NA	0.1324	NA	NA	NA
MIMAT0019022	NA	NA	NA	NA	0.903098	NA	NA	NA	NA	NA	NA	NA	NA	NA	NA	0.1981	NA	NA	NA	NA	NA	NA	0.5022	NA	NA	0.845173	NA	NA	NA	NA	NA	NA	NA	NA	0.2185	NA	NA	NA	NA	0.693921	NA	NA	NA	NA	NA	NA	NA	NA	NA
MIMAT0019023	NA	NA	NA	NA	NA	NA	NA	NA	NA	NA	NA	NA	NA	NA	NA	NA	NA	NA	NA	NA	NA	NA	NA	NA	0.1814	NA	0.2517	NA	NA	NA	NA	NA	NA	NA	NA	NA	NA	NA	NA	NA	NA	NA	NA	NA	0.1979	NA	NA	0.1988	NA
MIMAT0004776	2.70394	1.59257	3.27574	2.76442	2.82577	2.50847	2.61868	4.47409	1.29236	2.4648	2.38057	3.50227	2.87437	4.39954	1.88187	2.3976	3.45613	2.12844	2.7417	4.12382	3.31073	3.30891	1.88992	2.7411	4.57147	2.59555	4.08821	4.25503	3.38268	0.399983	2.47076	1.47142	2.46339	3.00729	4.25905	2.25718	2.06505	2.96467	4.16914	3.38851	2.86277	2.56657	2.88066	3.7885	1.02071	3.15073	1.32915	2.78882	0.709
MIMAT0000438	7.40289	7.47716	5.67862	7.16924	8.50007	6.61271	8.21775	4.86155	7.71452	9.80048	6.88549	7.11747	7.21029	7.4853	7.39274	5.3898	7.14787	6.99782	7.03427	8.41579	7.20377	8.22029	7.22925	6.14677	7.50681	8.34501	6.09732	7.81611	7.34452	7.59365	8.36832	7.51522	6.97883	8.17187	8.44123	7.91783	8.37265	7.51297	7.87849	7.27639	7.09936	7.97097	7.64235	7.5008	8.83317	8.7074	7.97593	7.80053	7.74957
MIMAT0004774	4.4568	4.11701	5.56816	5.18269	6.78946	6.65125	4.11922	7.89829	3.52438	5.66463	8.52951	7.00594	6.00469	7.20719	5.10023	5.9461	5.2687	5.22584	5.1425	5.94408	4.98445	5.3161	5.24998	4.77173	4.87137	5.36996	5.10232	4.88692	7.15983	2.68529	4.32787	4.58776	5.0553	4.31334	4.67372	4.85681	3.55803	4.43655	5.66655	5.55212	5.09092	4.64414	4.39115	5.08656	3.94532	5.39363	4.31513	5.95826	3.8724
MIMAT0004775	2.98093	2.8844	4.34039	3.07898	4.98824	5.11464	3.19995	3.94277	2.60216	5.35269	5.15441	4.20435	4.21447	4.66551	3.61819	3.58988	2.65091	2.82178	3.60736	3.9961	3.27704	3.24076	3.56371	2.80953	2.75727	3.72381	2.70637	3.10428	4.39732	2.06883	3.33443	3.42636	3.17996	2.22658	2.29977	3.58059	2.36856	3.258	3.41621	2.96258	1.67191	3.41873	2.13897	3.17175	2.81287	3.11909	3.14809	3.48492	2.99664
MIMAT0004772	NA	0.1532	NA	NA	NA	NA	NA	NA	NA	NA	NA	NA	NA	NA	NA	0.1981	0.3711	0.2926	0.2505	NA	NA	0.2969	0.874005	0.2172	NA	0.6145	NA	NA	NA	NA	NA	NA	NA	NA	0.2185	NA	NA	0.1601	0.5577	NA	0.251089	0.3871	NA	0.3415	NA	0.253664	NA	0.1988	NA
MIMAT0004773	1.68096	1.00586	3.62385	0.634082	3.47895	4.47297	2.32176	1.61076	1.96282	2.7556	3.72681	3.46059	3.38393	3.46631	2.54453	2.35667	2.84014	2.67715	2.93296	3.65914	2.53713	1.81276	2.53303	2.38511	2.94465	2.71706	2.52717	1.29135	3.80042	0.96983	1.35494	2.38146	2.46342	0.847994	2.03785	2.00879	1.44082	2.31903	2.7363	2.57094	1.16076	2.08111	1.47316	3.46128	1.3045	1.8069	1.14408	2.31892	1.82321
MIMAT0004770	NA	NA	1.09275	0.3516	0.3674	1.86826	1.33546	2.53424	NA	1.61104	2.94362	1.19623	0.1628	NA	1.05254	0.1981	0.666009	1.48471	0.649739	0.4534	3.83484	2.59124	1.4143	0.405938	0.619084	1.7611	1.22291	NA	5.33885	3.64427	0.1761	2.11238	1.84002	NA	1.39772	0.2498	0.575236	0.555197	NA	0.2701	0.891816	4.38197	0.67098	0.952076	0.527064	0.469326	0.381281	0.1988	NA
MIMAT0000431	5.11468	4.34084	5.41061	5.23647	5.02722	4.73849	5.10932	0.7525	4.36208	4.86546	4.3847	5.45746	5.47553	4.48297	4.52495	4.58293	4.17116	5.55049	5.06291	5.59306	4.93137	5.82058	4.676	4.94909	5.5283	5.56058	4.37991	6.3901	4.83882	4.91574	4.14943	5.33791	5.2993	5.4661	5.0028	5.95113	3.92673	5.88194	4.54956	5.18659	3.7498	5.62401	5.5048	4.82634	4.65843	5.32958	4.70642	4.34749	3.7416
MIMAT0000430	0.633753	2.04824	0.8116	1.80058	2.16348	4.02628	1.94735	1.61076	1.96281	0.8654	0.65426	2.83478	2.11952	0.810507	3.26213	3.06362	1.61048	3.74044	0.814327	2.89979	3.05673	3.96547	NA	1.39212	3.01809	4.2916	4.2702	6.16848	1.14562	2.58645	1.1166	3.26938	2.76668	1.54598	1.56646	2.51749	2.22478	1.19593	0.3057	0.866825	3.3668	3.90714	1.02582	5.23207	1.02073	1.22991	1.23958	0.1988	1.18222
MIMAT0000433	6.45739	5.55555	5.94938	7.36549	8.14998	5.81932	7.76129	0.7525	4.72028	7.42935	6.66938	6.18335	6.62905	6.81487	5.59296	7.16347	4.74504	6.14361	6.37026	6.48299	7.71655	8.22247	5.61113	7.06658	6.63823	8.00374	5.81423	6.97966	6.17793	5.29422	5.52091	7.5918	6.63935	6.31117	5.20176	8.76932	5.54861	7.77192	5.1574	5.924	5.13445	7.75257	5.04322	6.05656	7.60429	8.12929	7.28007	6.81272	5.40103
MIMAT0004951	2.8764	1.0058	2.36551	1.07301	1.59929	2.50842	2.93836	2.35278	1.06136	1.5106	1.22574	1.38642	2.77716	1.70569	NA	1.30576	2.58189	2.05227	1.94277	3.43117	2.22046	2.28806	1.52284	1.91135	4.31407	2.59557	2.01767	1.0605	1.98685	0.712836	1.0275	0.5293	1.84002	0.847994	5.45396	2.19901	1.30438	2.41738	1.93805	2.35569	2.5243	2.08114	1.22169	2.94036	1.12163	2.38643	0.812522	1.22026	NA
MIMAT0004956	0.8698	0.418028	1.86519	1.55173	1.45419	1.50347	1.33545	NA	0.446	0.2696	1.87867	NA	1.21061	1.00376	0.6202	1.12282	1.8641	1.59619	0.8143	1.76573	0.2972	1.90368	1.41436	1.09567	1.0509	2.23784	1.10001	2.08976	1.77605	0.969857	1.02756	2.31875	1.70381	1.08409	2.74886	1.21614	0.3161	0.865132	1.407	1.40456	0.963913	1.58514	1.98567	0.3415	1.12166	1.34359	0.381281	0.7981	1.94713
MIMAT0000434	11.0166	10.6849	10.7868	10.0796	12.546	10.104	12.8257	3.404	9.56297	10.1555	12.1525	10.2946	10.8912	10.7403	8.49754	12.5887	10.0788	10.8016	11.2133	11.86	12.3039	13.5445	11.2202	12.0606	11.8715	13.3637	11.4443	11.249	11.5696	6.98395	8.77675	10.9791	11.5656	10.6769	9.60553	12.2728	8.56593	12.5962	10.1865	10.6908	10.6282	11.7647	9.918	11.2059	9.28526	13.1959	10.7455	11.9843	9.42168
MIMAT0000437	10.099	9.31801	10.9844	9.39953	9.7785	11.0963	11.0345	14.4612	9.86882	9.57105	8.79665	12.2153	11.3791	10.1819	10.529	6.7921	10.3253	11.7337	9.9839	12.2151	10.3819	9.5364	8.6906	9.81065	11.4661	10.7237	9.57073	9.27482	10.0502	9.63919	9.09808	9.37415	9.74844	8.87996	10.6605	11.1188	8.86392	11.2253	10.8384	9.72676	9.26174	11.2812	10.5555	11.1462	9.14061	10.2702	9.65749	8.92866	8.59341
MIMAT0004955	5.46925	4.74198	6.48151	5.63124	6.35083	6.72545	5.97048	3.40402	5.16108	4.28486	5.72322	5.44683	6.04176	6.03536	6.26184	5.08022	5.69357	5.74445	5.60839	7.10675	5.51858	6.41835	5.41388	5.5883	5.95953	6.11332	4.71955	5.86235	6.45105	5.46046	5.20784	7.21948	5.42377	5.1907	7.46423	6.66627	4.80452	5.63517	5.81901	6.42704	4.64126	6.4534	6.02113	6.20229	5.10297	6.15688	4.98655	4.80188	5.42252
MIMAT0004558	8.73655	10.278	9.32846	10.7235	9.55148	10.9725	9.99173	10.7711	9.2621	10.7701	9.44332	10.5936	10.3775	10.3549	10.5477	6.54617	10.0571	8.96683	9.04999	9.96175	9.8771	11.7378	9.24055	8.66413	10.4831	10.7429	9.21081	9.43125	10.6397	9.01836	10.5639	9.76397	10.296	9.50485	10.7367	10.6235	9.39898	9.45252	10.2265	9.92588	10.3429	10.5977	10.9954	9.51335	9.67356	9.97414	10.8218	9.06105	10.1779
MIMAT0004559	4.69049	7.04605	4.07546	6.71083	5.66077	5.98177	6.20082	4.60158	5.54374	6.34227	3.86577	5.21569	7.02814	5.27414	5.51039	4.11609	6.35184	5.80954	3.87312	5.70967	4.80715	5.45782	4.91376	5.13396	5.60178	5.93075	5.67051	3.65306	7.34213	4.67232	5.14038	5.46639	5.59722	4.84207	6.37057	5.77305	6.38879	5.52185	5.92368	8.0363	7.19792	6.10882	6.20027	5.15306	5.72489	6.69683	4.79553	4.57918	5.89984
MIMAT0004556	2.70395	1.69606	0.811703	2.70459	3.04443	1.27935	2.08323	2.35275	1.06127	0.4967	0.65426	1.70491	1.13405	2.32797	1.3848	1.38916	0.3711	0.925531	0.4639	2.62534	0.753915	NA	1.41436	1.2999	1.45508	1.76106	0.4659	2.68445	1.1456	0.4	2.12935	0.735394	NA	2.53616	2.52137	2.41891	2.06502	0.1601	0.3057	1.61313	3.94944	2.08111	2.08973	1.58626	1.745	0.656837	2.16306	3.76128	3.77545
MIMAT0004557	1.07258	1.00584	2.00749	0.634082	2.06691	1.50343	1.44043	NA	2.20883	1.6111	0.46732	2.08018	1.54191	1.0038	1.05254	1.21713	1.86403	1.97187	1.53418	2.11233	1.37937	1.37811	1.16923	1.91136	1.98095	1.97102	1.44116	1.06049	1.71814	NA	1.02755	0.735411	1.38549	0.400494	2.14837	2.31312	1.56539	0.769092	2.32534	1.16056	0.251089	0.823279	0.530255	0.737757	1.02078	1.22983	0.539776	0.798023	0.3976
MIMAT0004554	NA	0.1532	NA	0.3516	0.3674	NA	NA	NA	NA	NA	0.46732	NA	NA	NA	NA	NA	NA	NA	NA	0.2445	NA	NA	NA	NA	NA	NA	NA	NA	NA	0.146	NA	NA	NA	NA	NA	NA	NA	NA	NA	NA	NA	NA	NA	0.1808	NA	0.1324	NA	NA	NA
MIMAT0004555	1.55119	1.8829	0.811703	1.2508	1.85205	1.5034	1.71605	NA	1.0613	2.99748	2.0215	2.28524	1.54185	2.25385	1.3848	0.527631	2.17646	1.88676	0.962041	3.13017	3.31071	1.49974	2.42535	0.981567	2.02914	3.07616	1.63064	2.08985	2.58122	1.04623	1.4944	1.95644	1.55343	0.970883	2.97568	2.60971	2.72986	1.58254	2.10556	2.92395	2.17542	2.08114	1.02592	2.50416	2.13119	2.43859	2.61886	4.77098	3.25822
MIMAT0004552	2.43632	2.90612	3.15863	4.90558	2.33916	4.00814	4.15047	8.17615	3.52439	3.92388	2.57835	5.3243	3.78499	3.53046	5.8019	1.54288	1.46475	2.62553	4.8983	3.18976	2.88864	2.47748	2.77159	2.87492	2.72844	3.43605	2.86573	3.52286	2.95157	5.29815	4.191	4.80918	2.76666	2.97826	3.92819	4.09318	3.64535	2.77983	1.93805	1.1606	2.04859	3.55719	3.88419	2.20322	4.46073	3.78473	4.5568	2.93538	4.88557
MIMAT0004553	3.93934	4.17185	4.3404	3.80418	4.69712	2.74628	5.65322	3.09274	3.27722	2.75558	6.32849	3.8639	4.02631	4.49909	3.17902	3.692	4.79165	4.10334	3.36336	4.04533	3.7143	5.14968	4.33283	3.8883	3.93887	4.69796	4.005	3.52288	3.68429	0.889108	2.90509	3.13031	5.17609	2.75707	6.22051	4.23028	2.49928	4.90055	4.83842	3.4977	4.80228	3.55719	5.06254	3.4958	2.75118	4.74181	3.60788	3.72952	3.43798
MIMAT0004550	1.90997	2.45414	4.25736	6.05307	4.93449	6.73098	3.98682	6.34174	5.33948	6.15523	4.00977	6.60783	5.43622	3.56153	7.33153	1.74649	3.63705	4.82933	4.20521	4.47482	4.32113	4.25164	2.89784	4.22548	4.16042	4.52577	3.80318	4.63709	5.17098	7.88116	4.70345	6.40168	4.04269	4.37024	5.08154	4.17095	3.90324	4.84267	3.44768	5.48734	2.91825	4.77146	5.2704	3.82966	4.24286	4.67287	4.48063	3.34499	3.52004
MIMAT0004551	2.43635	1.83835	2.96288	3.48669	3.14244	4.59973	2.37565	NA	3.04367	2.9599	2.62374	2.62424	3.29892	3.7349	2.99684	1.97975	3.53124	2.82178	2.07841	3.00308	2.28958	3.16932	1.5228	2.51377	3.04177	2.71708	3.76323	2.90954	3.30617	3.08	2.80142	3.42638	2.69663	3.00731	2.67699	2.69643	1.68015	2.75496	3.24722	4.10996	3.18269	1.91448	4.17172	2.75309	1.80693	3.22672	3.26619	3.14265	1.82319
MIMAT0004952	NA	0.534125	NA	NA	NA	NA	NA	NA	NA	NA	NA	0.4037	NA	NA	NA	NA	NA	NA	NA	0.2445	NA	NA	NA	NA	NA	0.3397	NA	NA	NA	0.146	0.1761	0.2888	NA	NA	0.2185	NA	NA	0.1601	0.3057	0.8668	NA	0.38711	0.1992	0.48598	0.1979	0.365521	NA	NA	NA
MIMAT0004798	NA	NA	NA	0.3516	NA	NA	0.2515	NA	NA	NA	0.2525	NA	NA	NA	NA	0.1981	NA	NA	NA	0.63603	NA	NA	NA	NA	0.1814	NA	0.2517	NA	0.344127	NA	NA	NA	NA	0.5656	0.2185	NA	NA	NA	0.5577	NA	0.464897	NA	NA	NA	NA	0.1324	NA	NA	NA
MIMAT0004799	5.64651	6.4432	6.4997	6.52883	8.33104	7.02554	7.02585	7.95912	5.76175	6.65624	6.98685	6.8811	6.77787	6.40409	6.51157	6.01998	5.87761	5.98878	5.46084	7.14865	6.58758	6.76601	6.58383	5.14726	5.68307	7.01377	6.25322	5.401	7.243	4.83195	7.43026	5.83457	6.78992	6.32564	6.37627	6.91476	6.46674	6.09752	7.76883	6.98897	7.89241	6.8126	6.26835	6.55556	6.10972	6.34603	6.83843	6.42319	6.25188
MIMAT0004953	NA	0.417953	NA	1.91047	NA	0.493416	0.2515	NA	NA	NA	NA	NA	NA	NA	NA	NA	NA	NA	NA	NA	NA	NA	0.2728	NA	0.1814	0.614462	NA	4.93895	NA	0.146	NA	NA	0.4033	0.2141	2.09412	NA	NA	0.1601	2.83504	1.7071	1.90947	NA	NA	0.3415	NA	0.656831	0.381281	NA	NA
MIMAT0004794	NA	NA	NA	NA	NA	NA	NA	NA	NA	NA	NA	NA	NA	NA	NA	NA	NA	NA	NA	NA	NA	NA	NA	NA	NA	NA	NA	NA	NA	NA	NA	NA	NA	NA	NA	NA	NA	NA	NA	0.2701	NA	NA	NA	NA	NA	NA	NA	NA	NA
MIMAT0004795	NA	NA	NA	NA	NA	NA	NA	NA	NA	NA	NA	NA	NA	NA	NA	NA	NA	NA	NA	NA	NA	NA	NA	NA	NA	0.3397	NA	NA	NA	NA	NA	NA	NA	NA	NA	NA	NA	NA	NA	NA	NA	NA	NA	NA	NA	NA	NA	NA	NA
MIMAT0004797	7.64871	7.58463	8.58877	8.69185	8.10206	6.85306	10.7339	2.97205	8.33734	5.04675	8.98647	6.81645	8.00326	5.8592	7.59467	6.29073	8.60301	7.12175	8.43428	7.07547	7.18349	6.39116	10.7819	6.92716	8.47268	8.56221	6.21669	9.00196	7.44833	6.33784	7.06669	7.31089	9.14061	5.72369	10.2503	7.32854	5.13128	8.18124	6.95356	7.88865	6.89332	8.52955	7.94064	6.88548	6.74317	9.32955	6.12864	7.34438	10.5597
MIMAT0004950	NA	NA	1.09283	0.3516	0.3674	0.860451	0.4656	NA	0.446	0.4967	0.2525	0.718783	0.442	0.5875	NA	0.3723	0.3711	NA	0.2505	0.4534	0.54351	1.09922	0.2728	NA	0.3425	1.04405	0.2517	1.06052	0.742942	0.146	0.47452	NA	NA	NA	0.2185	0.9599	NA	0.1601	0.3057	0.8668	1.7143	NA	0.1992	0.341444	0.3718	0.3655	0.2032	1.1257	NA
MIMAT0004792	0.633753	0.417953	0.811703	1.68154	0.903037	0.493416	0.965128	1.61076	2.51343	1.01966	0.46732	0.977166	0.967838	1.00374	2.25094	0.527672	0.3711	0.5357	0.463872	0.4534	1.10021	0.2969	0.2728	0.2172	0.1814	1.51528	0.2517	NA	0.344127	0.511986	0.721685	1.07595	0.976429	NA	0.725945	0.4626	0.794806	1.5249	0.5577	NA	0.361945	0.38711	2.52027	0.1808	1.0208	0.656806	0.931704	0.529306	3.43799
MIMAT0004793	0.633753	0.4179	1.3279	0.3516	1.29277	NA	0.2515	NA	1.82209	NA	NA	NA	0.1628	0.5875	0.6202	0.1981	1.11999	0.2926	0.962105	0.2445	0.7539	0.2969	0.699952	0.722379	NA	0.614462	0.4659	NA	1.23088	NA	0.474542	NA	0.976429	1.18914	1.39773	0.648065	0.985358	0.3042	1.53003	1.16056	0.131	1.0546	0.374203	1.13863	0.1979	0.2536	0.931697	0.373494	NA
MIMAT0000432	10.224	10.2925	12.1644	7.56997	10.8814	10.0428	10.222	4.12366	10.3609	9.54114	9.3415	8.90627	9.73912	9.55208	9.06606	10.1838	10.8643	9.47513	10.5375	9.47221	9.17831	11.3147	11.1446	10.1346	9.44645	9.35223	10.239	2.20753	9.81419	7.11056	8.36495	8.90186	11.0041	9.68976	10.2142	9.08669	8.05549	11.6131	11.4586	10.1772	8.50644	10.2521	10.4449	9.01936	8.59287	10.1964	8.66171	9.85168	12.011
MIMAT0000435	15.7233	15.0656	15.4358	16.789	15.3825	16.2824	15.9973	15.109	17.2141	16.4629	13.7835	16.113	16.7918	14.8839	17.7071	13.6018	15.0802	16.9463	15.3826	16.0164	15.2116	13.9898	14.5594	14.5924	15.3511	16.2143	14.6494	15.8892	15.3098	18.9993	17.0035	18.1169	14.7419	16.1862	17.4757	16.7398	16.9631	15.65	14.925	14.569	15.3702	16.2899	16.8323	15.2215	17.5718	15.0534	17.3036	14.9071	17.4467
MIMAT0004957	1.40853	0.835171	NA	3.25612	1.45426	0.493416	2.47783	1.61076	2.20879	2.46476	3.47715	1.38652	0.563592	0.810507	1.88187	0.527631	1.30262	1.59623	1.09608	0.943643	0.54351	1.49967	2.04348	0.2172	0.619103	1.51519	0.965667	NA	1.52908	0.146	1.42629	0.2888	1.70384	1.95616	3.14523	2.13833	2.5605	1.26801	1.53009	2.35565	2.80504	1.05457	0.1992	1.04835	1.86624	1.22985	0.68257	1.92879	3.59773
MIMAT0022923	0.633753	0.741561	0.811703	0.3516	1.11102	NA	1.22223	NA	NA	NA	NA	NA	0.1628	NA	NA	NA	1.11999	0.5357	0.814314	0.635936	0.54351	NA	NA	0.405938	0.739748	1.04405	NA	0.7856	0.742948	NA	0.1761	0.2888	NA	NA	0.575758	0.4626	0.3161	0.769012	1.12432	1.40451	NA	0.692014	0.374203	0.737757	0.1979	0.469306	NA	0.1988	NA
MIMAT0004954	0.6337	1.48132	0.4622	1.91048	0.903037	NA	0.2515	1.90254	NA	NA	NA	0.9771	0.1628	0.3234	NA	NA	1.12006	1.23204	0.962053	0.797865	0.5436	0.2969	1.0292	0.572818	0.954464	0.3397	NA	0.78556	0.742942	0.146	0.1761	0.5293	0.976429	NA	0.2185	0.2498	NA	0.304195	0.7723	1.02121	0.2511	1.34414	0.530163	0.848912	0.371899	1.39717	NA	0.373494	NA
MIMAT0022925	NA	0.741645	0.811703	NA	1.29274	1.39579	1.33545	0.7525	0.446	0.4967	2.38053	0.4037	1.05333	0.587415	1.6547	0.1981	1.61044	0.925476	NA	1.76574	1.10022	1.81274	0.700015	0.857758	1.38282	1.51522	1.63063	4.19928	2.03509	0.146	0.47452	NA	1.38549	1.8953	0.4081	0.959836	0.3161	0.1601	0.958996	1.16061	1.03254	0.547604	1.22169	1.37978	0.1979	1.16954	0.812514	2.62573	0.708964
MIMAT0022924	NA	NA	NA	NA	0.3674	NA	0.4656	NA	0.446	NA	NA	NA	NA	NA	NA	NA	NA	NA	NA	0.2445	NA	NA	0.2728	0.2172	0.1814	NA	NA	NA	NA	0.146	NA	NA	0.4033	NA	NA	NA	NA	0.3042	0.3057	0.4976	0.131	0.2065	NA	0.3415	NA	0.1324	NA	0.1988	NA
MIMAT0022929	2.64155	3.46991	0.8116	5.18269	2.41958	1.15279	2.78737	2.35274	0.446	0.865495	0.654242	1.38642	1.59991	1.00376	2.40517	0.1981	2.65092	1.97186	2.20252	3.30208	2.07142	1.24541	1.62372	0.857786	2.32751	2.59559	1.22281	2.41757	1.83168	2.10504	3.49255	1.68534	2.18512	1.95614	3.36715	2.0088	2.67558	2.24954	1.64339	2.924	1.67197	2.2305	2.13894	2.24448	2.2696	2.75839	1.41349	2.27559	0.965
MIMAT0004779	NA	NA	NA	NA	NA	NA	NA	NA	NA	NA	NA	NA	NA	NA	NA	NA	NA	NA	NA	NA	1.10028	NA	NA	0.2172	0.48742	NA	NA	NA	NA	NA	NA	NA	0.718139	NA	0.2185	NA	NA	NA	NA	NA	NA	NA	NA	0.1808	NA	NA	NA	NA	NA
MIMAT0022732	NA	0.418028	NA	NA	NA	0.2677	0.2515	1.2445	NA	NA	0.6542	0.4037	0.3091	0.5875	0.6202	NA	0.3711	NA	NA	0.2445	NA	0.7531	NA	0.2172	NA	NA	0.2517	NA	NA	NA	0.333	NA	NA	0.2141	NA	NA	0.794806	NA	0.5577	0.4976	0.251089	0.2065	0.374203	NA	NA	0.1324	NA	0.1988	NA
MIMAT0026474	NA	NA	NA	NA	NA	NA	NA	NA	NA	NA	NA	NA	NA	NA	NA	NA	NA	NA	NA	NA	NA	NA	NA	NA	NA	NA	NA	NA	NA	NA	NA	NA	NA	NA	NA	NA	NA	NA	NA	NA	NA	NA	NA	NA	NA	NA	NA	NA	NA
MIMAT0026477	1.5512	2.23145	2.65221	5.08049	3.55211	2.021	2.97381	5.22061	1.29223	1.70497	5.01636	3.37337	2.30541	2.46566	2.89635	1.30573	2.07964	2.39826	1.79289	3.03592	1.99063	3.34173	1.41428	1.97238	1.38286	4.10392	2.66359	2.83835	2.44511	1.31685	2.47076	1.87158	2.18516	1.95611	3.72916	3.16015	2.29848	2.5389	1.93801	3.52378	2.98904	1.91449	2.93756	2.11703	1.02071	2.35971	2.54599	2.87852	1.53804
MIMAT0027640	NA	NA	NA	NA	NA	NA	NA	NA	NA	NA	NA	NA	NA	NA	NA	NA	NA	NA	NA	NA	NA	NA	NA	NA	NA	NA	NA	NA	NA	NA	NA	NA	NA	NA	NA	NA	NA	NA	NA	NA	NA	NA	NA	NA	NA	NA	NA	NA	NA
MIMAT0003333	NA	NA	NA	NA	NA	NA	NA	NA	NA	NA	NA	0.718783	NA	NA	NA	NA	NA	0.2926	NA	NA	NA	NA	0.5022	NA	NA	NA	NA	NA	NA	NA	0.1761	NA	NA	NA	NA	NA	NA	0.865132	0.3057	NA	NA	NA	NA	NA	0.1979	NA	NA	NA	1.37111
MIMAT0003332	1.25037	0.5341	1.0927	0.634	1.2928	NA	0.4656	NA	NA	NA	0.2525	NA	0.1628	0.3234	NA	NA	0.3711	0.7437	0.8143	0.453506	1.1002	0.2969	NA	0.4059	1.22637	NA	0.6524	0.4456	0.4897	0.2786	0.1761	NA	0.4033	0.2141	0.2185	0.6481	0.3161	0.1601	0.3057	0.693993	0.131	1.2539	0.3741	1.04838	0.3718	0.2536	0.2032	0.1988	0.709
MIMAT0003331	1.55115	1.29631	0.4622	1.91048	1.2928	0.493416	1.09938	NA	0.7863	NA	0.2525	0.4037	0.96782	NA	NA	NA	1.61051	1.59619	1.94268	1.9835	1.10021	0.936525	1.02914	0.5727	2.36555	1.37455	0.465942	1.4903	0.958274	0.400007	0.47452	0.915699	0.4033	0.400494	0.986195	2.00883	0.794806	0.769011	0.772256	1.61312	0.361955	1.85436	0.1992	1.87595	0.7949	1.59368	0.812522	0.67	0.708964
MIMAT0003330	1.55116	2.00862	0.4622	2.01273	0.3674	0.4935	0.965121	2.69544	NA	NA	0.2525	1.19629	0.309078	0.3234	1.05254	NA	0.666009	0.743762	1.09606	1.41239	0.2972	0.2969	1.16923	0.857826	0.4874	1.21874	0.2517	0.7856	0.621834	NA	1.49438	0.2888	0.718139	0.713711	0.408219	0.2498	1.30437	0.955118	0.557813	1.70707	0.651071	0.38711	0.917003	0.952076	1.30441	1.28781	0.812522	1.12563	1.37111
MIMAT0003337	NA	NA	NA	NA	NA	NA	0.2515	NA	NA	NA	NA	0.4037	NA	NA	NA	NA	NA	NA	NA	NA	NA	NA	NA	NA	NA	NA	NA	NA	NA	NA	NA	NA	NA	NA	0.2185	NA	NA	0.1601	NA	0.2701	NA	NA	NA	NA	NA	NA	0.5398	NA	NA
MIMAT0003336	NA	0.418028	NA	NA	0.3674	NA	0.2515	2.53421	NA	0.496664	0.968115	0.977235	0.1628	0.587415	NA	NA	NA	0.535746	NA	0.635936	NA	NA	NA	0.2172	NA	0.3397	NA	NA	NA	NA	0.603389	NA	NA	0.2141	0.408219	0.462664	NA	0.435195	0.557813	0.866825	0.131	0.2065	0.530163	NA	NA	0.253664	0.931692	0.373494	0.964912
MIMAT0003335	NA	NA	NA	NA	NA	NA	NA	NA	NA	NA	NA	NA	NA	NA	NA	NA	NA	NA	NA	NA	NA	NA	NA	NA	NA	NA	NA	NA	NA	NA	NA	NA	NA	NA	NA	NA	NA	NA	NA	NA	NA	NA	NA	NA	NA	NA	NA	NA	NA
MIMAT0004493	3.07836	1.36062	4.71692	2.50862	2.56805	2.15911	3.52035	NA	3.1652	1.15885	3.2924	0.7187	2.50077	2.09322	1.65464	2.0326	3.2491	1.88672	2.37064	2.89975	2.79662	3.98642	1.71801	2.47216	2.94469	2.53076	2.82753	3.77253	3.52458	0.400007	2.40155	0.915694	2.95844	3.5706	3.86487	2.19898	0.575236	3.5313	2.5159	5.73056	2.45098	1.79158	2.88071	2.39857	1.46671	2.85739	1.70874	1.75031	1.37109
MIMAT0003339	0.3514	1.22898	2.13701	2.70458	1.73115	1.27937	1.62988	NA	1.96286	1.51058	3.11269	1.55439	2.03799	2.00566	NA	1.46809	1.61051	1.23202	1.0961	2.04932	1.5009	2.0699	1.41425	0.722273	1.71264	1.97099	0.652407	3.10424	2.3719	1.11874	1.62157	2.44155	1.55341	2.07047	3.83214	1.86648	2.14713	1.12	2.39168	2.10254	1.58316	1.42903	1.22176	1.52071	1.86628	2.3324	1.32916	1.87173	2.16691
MIMAT0003338	5.39552	5.33714	6.95966	5.04475	6.44989	7.74216	4.9495	1.2445	4.229	5.89129	7.03181	6.18337	6.71686	6.58492	5.16648	6.30419	5.17807	5.91002	6.00322	6.1152	5.77514	4.57568	6.18619	5.57847	5.35495	6.01015	5.5524	4.75781	6.951	4.44433	4.56784	5.75984	5.6721	4.3364	3.97389	5.52325	4.36432	4.75764	5.44996	4.95715	4.83629	5.87535	4.02206	5.45483	4.88347	5.1183	4.43093	5.88441	3.3053
MIMAT0004492	NA	NA	NA	NA	NA	NA	NA	NA	NA	NA	NA	NA	NA	NA	NA	NA	NA	NA	NA	NA	NA	NA	NA	NA	NA	NA	NA	NA	NA	NA	NA	NA	NA	NA	NA	NA	NA	0.1601	NA	NA	NA	NA	NA	NA	NA	NA	NA	NA	NA
MIMAT0018984	NA	NA	NA	NA	NA	NA	NA	NA	NA	NA	NA	NA	NA	NA	NA	NA	NA	NA	NA	NA	NA	NA	NA	NA	NA	NA	NA	NA	NA	NA	NA	NA	NA	NA	NA	NA	NA	NA	NA	NA	NA	NA	NA	NA	NA	NA	NA	NA	NA
MIMAT0018985	NA	NA	NA	NA	NA	NA	NA	NA	NA	NA	NA	NA	NA	NA	NA	NA	NA	NA	NA	NA	NA	NA	NA	NA	NA	NA	NA	NA	NA	NA	NA	NA	NA	NA	NA	NA	NA	NA	NA	NA	NA	NA	NA	NA	NA	NA	NA	NA	NA
MIMAT0018980	NA	NA	NA	NA	NA	NA	NA	NA	NA	NA	NA	NA	NA	NA	NA	NA	NA	NA	NA	NA	NA	NA	NA	NA	NA	NA	NA	NA	NA	NA	NA	NA	NA	NA	NA	NA	NA	NA	NA	NA	NA	NA	NA	NA	NA	NA	NA	NA	NA
MIMAT0026473	NA	NA	NA	NA	NA	0.493416	0.2515	NA	NA	NA	NA	NA	NA	NA	NA	NA	NA	NA	NA	NA	NA	NA	NA	NA	NA	NA	NA	NA	NA	NA	NA	NA	NA	NA	NA	NA	NA	NA	NA	NA	0.131	NA	NA	NA	NA	NA	NA	NA	NA
MIMAT0016874	NA	NA	NA	NA	NA	NA	NA	NA	NA	NA	NA	NA	NA	NA	NA	NA	NA	NA	NA	NA	NA	NA	NA	NA	NA	NA	NA	NA	NA	NA	NA	NA	NA	NA	NA	NA	NA	NA	NA	NA	NA	NA	NA	NA	NA	NA	NA	NA	NA
MIMAT0018983	NA	0.741747	1.09283	0.870137	NA	NA	0.965116	NA	0.446	1.5106	1.10263	1.55448	0.44188	0.587415	0.6202	0.1981	0.3711	NA	NA	NA	1.50083	NA	0.2728	0.2172	NA	NA	1.10007	0.78556	0.489619	NA	NA	0.735411	0.7181	0.2141	0.408219	0.812381	NA	0.865172	0.557813	0.693921	0.251089	0.38711	0.530255	NA	0.1979	0.1324	0.2032	NA	1.37104
MIMAT0004490	0.3514	NA	NA	NA	NA	NA	NA	NA	NA	NA	0.2525	NA	NA	NA	NA	NA	0.3711	NA	0.2505	NA	NA	NA	NA	NA	NA	NA	NA	NA	0.3442	NA	0.1761	NA	NA	NA	0.7259	NA	NA	0.1601	NA	NA	0.131	NA	NA	0.1808	NA	NA	NA	NA	NA
MIMAT0018988	NA	NA	NA	NA	NA	NA	NA	NA	NA	NA	NA	NA	NA	NA	NA	NA	NA	NA	NA	NA	NA	NA	NA	NA	NA	NA	NA	NA	NA	NA	NA	NA	NA	NA	NA	NA	NA	NA	NA	NA	NA	NA	NA	NA	NA	NA	NA	NA	NA
MIMAT0018989	NA	NA	NA	NA	NA	NA	NA	NA	NA	NA	NA	NA	NA	0.3234	NA	NA	NA	NA	NA	NA	0.2972	NA	NA	NA	NA	NA	NA	NA	NA	NA	NA	NA	0.4033	NA	NA	NA	NA	0.1601	NA	0.497518	NA	NA	NA	NA	NA	0.1324	NA	NA	NA
MIMAT0011778	0.3514	NA	NA	NA	NA	0.2677	0.465597	NA	NA	NA	NA	0.4037	NA	NA	NA	NA	NA	NA	NA	0.2445	NA	NA	NA	NA	NA	NA	NA	NA	0.3442	NA	NA	NA	0.718139	NA	0.2185	NA	NA	NA	NA	NA	0.131	NA	NA	0.1808	0.1979	NA	0.2032	0.1988	NA
MIMAT0011775	NA	NA	0.811703	NA	NA	NA	NA	NA	NA	NA	0.4673	NA	0.1628	NA	0.6202	NA	NA	NA	0.2505	0.635936	NA	NA	0.2728	NA	0.3425	NA	NA	NA	NA	NA	NA	0.2888	NA	NA	NA	NA	NA	NA	NA	NA	0.561	NA	NA	NA	NA	NA	NA	NA	NA
MIMAT0011777	0.3514	0.1532	0.4622	0.3516	0.3674	0.2677	0.817034	2.35278	0.446	0.2696	0.2525	0.4037	0.4419	0.3234	NA	0.372254	NA	NA	NA	0.943591	NA	0.5429	0.502128	0.2172	0.48742	0.845173	0.652443	NA	0.621894	NA	NA	NA	0.4033	NA	0.408219	1.21611	0.3161	1.12009	0.959	0.866825	0.8918	0.69201	0.1992	0.7378	0.527064	0.566057	0.2032	0.798032	0.3976
MIMAT0019749	NA	NA	NA	NA	NA	NA	NA	NA	NA	NA	0.2525	NA	NA	NA	NA	NA	NA	NA	NA	NA	NA	NA	NA	NA	NA	NA	NA	NA	NA	NA	0.4745	NA	NA	NA	NA	NA	NA	NA	0.3057	NA	NA	NA	NA	NA	NA	NA	NA	NA	NA
MIMAT0019748	0.633753	0.534125	NA	0.3516	0.903037	0.2677	0.965119	NA	NA	0.496664	0.46732	0.718783	0.309078	1.46426	NA	0.667952	0.666009	0.535746	0.2505	NA	0.54351	1.09916	NA	0.4059	0.4874	NA	0.652443	0.4456	NA	NA	0.47452	NA	NA	NA	0.575758	0.2498	0.7948	NA	0.557813	0.4976	0.963887	0.2065	0.1992	0.48603	0.1979	0.469216	0.539793	0.373494	0.964942
MIMAT0031119	NA	NA	NA	NA	NA	NA	NA	NA	NA	NA	NA	NA	NA	NA	NA	NA	NA	NA	NA	NA	NA	NA	NA	NA	NA	NA	NA	NA	NA	NA	NA	NA	NA	NA	NA	NA	NA	NA	NA	NA	NA	NA	NA	NA	NA	NA	NA	NA	NA
MIMAT0019741	0.3514	NA	NA	0.3516	NA	NA	0.2515	NA	0.446	NA	NA	NA	0.1628	NA	NA	NA	NA	NA	NA	NA	NA	0.2969	0.2728	NA	NA	NA	NA	NA	NA	NA	NA	NA	NA	NA	NA	NA	NA	NA	NA	NA	0.251089	NA	NA	NA	NA	0.365462	0.2032	NA	0.3976
MIMAT0019740	NA	NA	NA	NA	NA	NA	NA	NA	NA	NA	NA	NA	NA	NA	NA	NA	NA	NA	NA	NA	NA	NA	NA	NA	NA	NA	NA	NA	NA	NA	NA	NA	NA	NA	NA	NA	NA	NA	NA	NA	NA	NA	NA	NA	NA	NA	NA	NA	NA
MIMAT0019743	NA	NA	NA	NA	NA	NA	NA	NA	NA	NA	NA	NA	NA	NA	NA	NA	NA	NA	0.2505	0.2445	NA	0.2969	NA	NA	NA	NA	NA	0.4456	0.1823	NA	0.1761	NA	NA	NA	NA	NA	NA	NA	NA	NA	NA	NA	NA	0.1808	NA	NA	NA	NA	NA
MIMAT0019742	0.3514	NA	NA	NA	NA	NA	NA	NA	NA	NA	NA	NA	NA	NA	NA	NA	NA	NA	NA	NA	NA	NA	NA	NA	NA	NA	NA	NA	NA	NA	NA	NA	NA	NA	NA	NA	NA	NA	NA	NA	NA	NA	NA	NA	NA	NA	0.2032	NA	NA
MIMAT0019745	NA	NA	NA	NA	NA	NA	NA	NA	NA	NA	NA	NA	NA	NA	NA	NA	NA	NA	NA	NA	NA	NA	NA	NA	NA	NA	NA	NA	NA	NA	NA	NA	NA	NA	NA	0.2498	NA	NA	NA	NA	NA	NA	NA	NA	NA	NA	NA	NA	NA
MIMAT0019744	NA	NA	NA	0.3516	NA	0.2677	0.2515	1.6107	NA	NA	0.6542	NA	NA	NA	NA	NA	NA	NA	NA	NA	NA	NA	NA	NA	0.1814	NA	NA	NA	NA	NA	NA	0.2888	NA	0.2141	0.2185	0.2498	NA	0.1601	NA	NA	0.131	NA	0.1992	NA	NA	NA	0.2032	NA	NA
MIMAT0019747	0.3514	NA	NA	NA	0.3674	NA	0.2515	NA	NA	0.2696	0.4673	NA	NA	0.3234	NA	NA	0.3711	0.5357	NA	0.943567	NA	0.2969	NA	NA	0.1814	0.3397	NA	NA	0.1823	NA	NA	0.2888	NA	NA	NA	0.2498	0.3161	0.1601	0.3057	0.866832	0.131	NA	NA	NA	NA	0.2536	NA	0.1988	NA
MIMAT0019746	1.07259	1.48123	1.70732	0.3516	1.73118	1.39581	1.71602	NA	NA	1.40258	1.80159	1.3864	1.35233	2.25392	NA	1.80844	1.30265	2.05225	1.62565	1.76582	1.71712	3.20545	1.52282	1.09566	2.20712	1.76106	0.8175	1.06052	2.48034	NA	0.333	0.735394	2.28398	1.76561	0.986213	0.959864	0.3161	2.31901	1.64334	2.3557	1.71431	1.25391	0.5301	2.11703	1.12165	2.18775	0.812522	1.02457	NA
MIMAT0019205	NA	0.1532	NA	NA	NA	NA	NA	NA	NA	NA	0.2525	NA	NA	NA	NA	0.668	NA	NA	NA	0.2445	NA	NA	NA	NA	0.1814	NA	0.2517	NA	0.1823	NA	NA	NA	NA	NA	NA	NA	NA	0.3042	NA	0.2701	NA	NA	NA	NA	NA	NA	0.2032	NA	NA
MIMAT0012735	NA	NA	NA	NA	NA	NA	NA	NA	NA	NA	NA	NA	NA	NA	NA	NA	NA	NA	NA	NA	NA	NA	NA	NA	NA	NA	NA	NA	NA	NA	NA	NA	NA	NA	NA	NA	NA	NA	NA	NA	NA	NA	NA	NA	NA	NA	NA	NA	NA
MIMAT0018360	0.633753	0.291682	0.4622	0.3516	0.3674	0.688622	0.651991	1.2445	0.446	NA	0.46732	1.38647	NA	1.0038	NA	0.3723	0.3711	0.535746	NA	NA	NA	0.543004	1.16931	NA	0.1814	0.3397	0.2517	NA	0.1823	0.146	0.333024	0.2888	0.7181	NA	0.861874	0.648065	0.3161	NA	0.3057	0.693993	0.131	NA	0.374203	NA	0.3718	0.365462	NA	0.915753	0.965
MIMAT0019714	NA	NA	NA	NA	NA	NA	NA	NA	NA	NA	NA	NA	NA	NA	NA	NA	NA	NA	NA	NA	NA	NA	NA	NA	NA	NA	NA	NA	NA	NA	NA	NA	NA	NA	NA	NA	NA	NA	NA	NA	NA	0.2065	NA	NA	NA	NA	NA	NA	NA
MIMAT0013518	NA	NA	NA	NA	0.903037	NA	NA	NA	NA	NA	0.2525	NA	NA	NA	NA	NA	NA	NA	NA	0.4534	NA	NA	NA	NA	0.1814	NA	0.2517	NA	NA	NA	0.333	NA	NA	NA	0.2185	0.462664	0.3161	NA	0.5577	NA	NA	NA	NA	1.13855	NA	NA	NA	NA	NA
MIMAT0013516	NA	NA	NA	0.870137	NA	0.688622	NA	NA	NA	NA	NA	NA	0.309078	NA	NA	NA	NA	NA	0.2505	NA	NA	NA	NA	NA	NA	NA	NA	NA	NA	0.146	NA	NA	NA	NA	NA	NA	0.3161	NA	NA	NA	NA	NA	NA	0.341444	NA	NA	0.2032	NA	NA
MIMAT0013517	NA	NA	NA	NA	0.659972	NA	NA	NA	NA	NA	0.46732	NA	NA	NA	NA	NA	NA	NA	NA	NA	NA	NA	NA	NA	0.342518	NA	NA	0.4456	0.1823	NA	0.831021	NA	NA	NA	0.2185	NA	1.30438	NA	0.959035	NA	NA	NA	NA	1.22359	0.1979	NA	NA	NA	NA
MIMAT0013515	NA	NA	NA	NA	NA	0.2677	NA	1.2445	NA	NA	NA	NA	NA	NA	NA	NA	NA	NA	NA	NA	NA	NA	NA	NA	NA	NA	NA	NA	NA	0.146	NA	NA	NA	NA	NA	NA	NA	NA	NA	NA	0.131	NA	NA	NA	NA	0.1324	NA	NA	NA
MIMAT0026744	NA	NA	0.4622	0.3516	NA	NA	NA	NA	NA	NA	NA	NA	NA	NA	NA	NA	NA	NA	NA	NA	NA	NA	NA	NA	NA	NA	NA	NA	NA	NA	NA	NA	NA	NA	NA	0.2498	NA	NA	NA	NA	0.131	0.3871	NA	NA	NA	NA	NA	NA	NA
MIMAT0026475	0.3514	1.08413	1.86519	1.55169	1.96343	0.86047	1.87431	3.65982	0.7863	NA	1.95183	0.977166	0.44188	1.59	0.6202	0.3723	1.3027	0.743723	0.463872	2.74937	1.50095	1.24531	0.5022	0.2172	1.65244	1.86977	1.87501	0.4456	1.83174	0.278573	0.93262	NA	1.55341	0.4006	2.03782	2.60974	0.575236	1.7926	0.772354	2.1025	0.362	1.58511	0.67098	2.32353	0.794849	1.88397	1.49316	0.373494	1.37111
MIMAT0016858	NA	NA	NA	NA	NA	NA	0.4656	NA	NA	0.4967	NA	NA	NA	NA	NA	NA	NA	0.2926	NA	0.4534	NA	NA	0.2728	NA	NA	NA	NA	NA	NA	0.146	NA	NA	0.4033	0.2141	NA	NA	NA	0.1601	NA	NA	NA	NA	0.1992	NA	NA	NA	0.3813	0.1988	0.3976
MIMAT0019969	0.3514	0.1532	NA	NA	NA	NA	0.4656	NA	NA	NA	0.46732	NA	0.309078	NA	NA	NA	NA	NA	NA	NA	NA	NA	NA	NA	0.3425	NA	0.2517	NA	NA	NA	NA	NA	NA	0.2141	NA	NA	NA	NA	NA	NA	NA	NA	NA	NA	0.1979	0.253664	0.2032	NA	NA
MIMAT0019968	NA	NA	NA	NA	NA	NA	NA	NA	NA	NA	NA	NA	NA	NA	NA	NA	NA	NA	NA	NA	NA	NA	NA	NA	NA	NA	NA	NA	NA	NA	NA	NA	NA	NA	NA	NA	NA	NA	NA	NA	NA	NA	NA	NA	NA	NA	NA	NA	NA
MIMAT0019965	NA	NA	NA	NA	NA	NA	NA	NA	NA	NA	NA	NA	NA	NA	NA	NA	NA	NA	NA	NA	NA	NA	NA	NA	NA	NA	NA	NA	NA	NA	NA	NA	NA	NA	NA	NA	NA	NA	NA	NA	NA	NA	NA	NA	NA	NA	NA	NA	NA
MIMAT0019964	NA	NA	NA	0.3516	NA	NA	NA	NA	NA	NA	NA	NA	NA	NA	NA	NA	NA	NA	NA	NA	NA	NA	NA	NA	NA	NA	NA	NA	NA	NA	NA	NA	NA	NA	NA	NA	NA	0.304195	NA	NA	NA	NA	0.3741	NA	NA	NA	NA	0.1988	NA
MIMAT0019967	NA	NA	NA	NA	NA	NA	NA	NA	NA	NA	NA	NA	NA	NA	NA	NA	NA	NA	NA	NA	NA	NA	NA	NA	NA	NA	NA	NA	NA	NA	NA	NA	NA	NA	NA	NA	NA	NA	NA	NA	0.131	NA	NA	NA	NA	NA	NA	NA	NA
MIMAT0019966	NA	NA	NA	0.634082	NA	NA	NA	NA	0.446	NA	0.4673	0.4037	NA	NA	NA	NA	NA	0.5357	NA	NA	NA	NA	NA	NA	0.1814	NA	0.4659	0.4456	NA	NA	0.333	NA	NA	0.5656	NA	0.2498	NA	NA	NA	0.4976	0.561	NA	NA	NA	NA	0.1324	NA	NA	NA
MIMAT0019961	NA	NA	NA	NA	NA	NA	NA	NA	NA	NA	NA	NA	NA	NA	NA	NA	NA	NA	NA	NA	NA	NA	NA	NA	NA	NA	NA	NA	NA	NA	NA	NA	NA	NA	NA	NA	NA	NA	NA	NA	NA	NA	NA	NA	NA	NA	NA	NA	NA
MIMAT0019960	0.3514	NA	NA	NA	NA	NA	NA	NA	NA	NA	NA	NA	0.1628	0.3234	NA	NA	NA	NA	0.4639	NA	NA	0.5429	0.502128	NA	0.48742	NA	NA	NA	NA	NA	NA	NA	0.976396	0.5656	NA	0.462664	NA	NA	NA	NA	0.131	NA	NA	NA	NA	NA	0.2032	NA	NA
MIMAT0019963	NA	0.641636	NA	0.634	0.3674	0.4935	0.2515	NA	0.446	1.15893	0.819679	NA	0.1628	0.3234	NA	0.1981	0.666009	0.2926	0.463872	0.636	NA	1.09924	0.2728	0.572783	0.1814	0.845206	0.2517	1.29135	NA	0.146	0.721685	0.529319	1.38549	1.89534	1.39768	NA	NA	0.769092	0.3057	0.2701	0.251089	0.2065	0.799193	NA	0.794923	0.566142	0.682591	0.373494	0.964942
MIMAT0019962	NA	NA	NA	NA	NA	NA	NA	NA	NA	NA	NA	NA	NA	NA	NA	NA	NA	NA	NA	NA	NA	NA	NA	NA	NA	NA	NA	NA	NA	NA	NA	NA	NA	NA	NA	NA	NA	NA	NA	NA	NA	NA	NA	NA	NA	NA	NA	NA	NA
MIMAT0002848	NA	NA	NA	NA	NA	NA	NA	2.6954	NA	NA	2.21212	0.4037	0.1628	NA	NA	NA	NA	NA	NA	NA	NA	NA	0.700015	NA	NA	NA	NA	NA	0.1823	NA	NA	NA	NA	NA	NA	NA	NA	NA	NA	NA	0.131	0.943583	NA	NA	NA	NA	NA	NA	NA
MIMAT0002849	NA	NA	NA	NA	NA	NA	NA	0.7525	NA	NA	0.46732	NA	NA	NA	NA	NA	NA	NA	NA	NA	NA	NA	NA	NA	NA	NA	NA	NA	0.1823	NA	NA	NA	NA	NA	NA	NA	NA	NA	NA	NA	0.131	0.547595	NA	NA	NA	NA	NA	NA	NA
MIMAT0002846	NA	NA	NA	NA	NA	NA	NA	NA	NA	NA	0.4673	NA	NA	NA	NA	NA	NA	NA	NA	NA	NA	NA	0.2728	NA	0.1814	NA	NA	NA	NA	NA	NA	NA	NA	NA	NA	0.2498	NA	NA	NA	NA	NA	0.692014	NA	NA	NA	NA	NA	NA	NA
MIMAT0002847	NA	NA	0.4622	NA	NA	NA	NA	2.35279	NA	NA	2.08785	0.4037	NA	NA	0.6202	NA	NA	NA	NA	0.2445	NA	NA	0.699952	NA	NA	NA	NA	NA	0.95831	NA	NA	NA	NA	NA	NA	NA	NA	NA	NA	NA	0.561028	1.2539	NA	0.1808	NA	NA	NA	NA	NA
MIMAT0002844	NA	NA	NA	NA	NA	NA	NA	3.65983	NA	NA	1.8787	0.4037	NA	NA	NA	NA	NA	NA	NA	NA	NA	NA	0.2728	NA	NA	NA	NA	NA	1.05495	NA	NA	NA	NA	NA	NA	NA	NA	NA	NA	NA	0.361955	1.65731	NA	0.1808	NA	NA	NA	NA	NA
MIMAT0002842	NA	NA	NA	NA	NA	NA	NA	NA	NA	NA	0.654242	0.4037	NA	NA	NA	NA	NA	NA	NA	NA	NA	NA	0.2728	NA	NA	NA	NA	NA	NA	NA	NA	NA	NA	NA	NA	NA	NA	NA	NA	NA	NA	1.25389	NA	NA	NA	NA	NA	NA	NA
MIMAT0002843	NA	NA	NA	NA	NA	NA	NA	NA	NA	NA	0.4673	NA	NA	NA	NA	NA	NA	NA	NA	NA	NA	NA	0.2728	NA	0.1814	NA	NA	NA	NA	NA	NA	NA	NA	NA	NA	NA	NA	NA	NA	NA	NA	0.5476	NA	NA	NA	NA	NA	NA	NA
MIMAT0002840	NA	NA	NA	NA	NA	NA	NA	1.6107	NA	NA	1.54224	NA	NA	NA	NA	NA	NA	NA	NA	NA	NA	NA	NA	NA	NA	NA	NA	NA	NA	NA	NA	NA	NA	0.2141	NA	NA	NA	NA	NA	NA	0.131	0.692	NA	NA	NA	NA	NA	NA	NA
MIMAT0002841	NA	NA	NA	NA	NA	NA	NA	0.7525	NA	NA	0.8196	0.4037	NA	NA	NA	NA	NA	NA	NA	NA	NA	NA	NA	NA	NA	NA	NA	NA	0.3442	NA	NA	NA	NA	NA	NA	NA	NA	NA	NA	NA	0.4649	0.5476	NA	NA	NA	NA	NA	NA	NA
MIMAT0027436	NA	NA	NA	NA	NA	NA	NA	NA	NA	NA	NA	NA	NA	NA	NA	NA	NA	NA	NA	NA	NA	NA	NA	NA	NA	NA	NA	NA	NA	NA	NA	NA	NA	NA	NA	NA	NA	NA	NA	NA	NA	NA	NA	NA	NA	NA	NA	NA	NA
MIMAT0027437	NA	NA	NA	0.8701	NA	NA	NA	NA	NA	NA	NA	NA	NA	NA	NA	NA	NA	NA	NA	NA	NA	NA	NA	NA	NA	NA	NA	NA	NA	NA	NA	NA	NA	NA	0.2185	NA	NA	NA	NA	NA	NA	NA	NA	NA	NA	NA	NA	NA	NA
MIMAT0027434	NA	NA	NA	NA	NA	NA	NA	NA	NA	NA	NA	NA	0.309078	0.587415	NA	NA	NA	0.2926	NA	NA	NA	NA	0.502128	0.2172	NA	NA	NA	0.4456	0.1823	NA	NA	NA	NA	NA	0.2185	NA	NA	NA	NA	NA	0.361945	NA	NA	0.1808	NA	0.1324	NA	NA	NA
MIMAT0022928	0.3514	NA	0.4622	NA	NA	NA	NA	NA	NA	NA	NA	NA	NA	NA	NA	NA	NA	0.2926	NA	0.2445	NA	NA	0.2728	NA	0.342518	0.6145	NA	NA	NA	NA	0.1761	NA	NA	0.2141	0.575758	NA	NA	0.304195	NA	0.694	NA	0.2065	0.1992	0.3415	NA	0.1324	NA	NA	NA
MIMAT0018188	NA	NA	NA	NA	NA	NA	NA	NA	NA	NA	NA	NA	NA	NA	NA	NA	NA	NA	NA	NA	NA	NA	NA	NA	NA	NA	NA	NA	NA	NA	NA	NA	NA	NA	NA	NA	NA	NA	NA	NA	NA	NA	NA	NA	0.1979	NA	NA	NA	NA
MIMAT0027433	NA	NA	0.4622	NA	0.3674	NA	NA	NA	0.446	0.2696	NA	NA	0.1628	0.3234	0.6202	NA	0.3711	NA	NA	0.2445	NA	NA	NA	0.2172	0.619103	NA	0.2517	NA	0.1823	NA	NA	NA	NA	NA	0.2185	NA	NA	NA	NA	NA	NA	NA	0.530163	NA	NA	0.1324	NA	NA	0.3976
MIMAT0027430	0.3514	NA	NA	NA	NA	NA	NA	NA	NA	NA	NA	NA	NA	NA	NA	NA	NA	NA	NA	NA	NA	NA	NA	NA	NA	NA	NA	NA	NA	NA	NA	NA	NA	NA	NA	NA	NA	NA	NA	NA	0.464888	NA	NA	NA	NA	NA	NA	NA	NA
MIMAT0027431	NA	NA	NA	NA	NA	NA	0.2515	NA	NA	NA	NA	NA	NA	0.3234	NA	NA	NA	NA	NA	0.2445	NA	NA	NA	NA	NA	NA	NA	NA	0.1823	NA	NA	NA	NA	NA	NA	NA	NA	NA	NA	NA	0.560981	NA	NA	NA	NA	NA	NA	NA	NA
MIMAT0018184	NA	NA	NA	NA	0.3674	0.2677	0.2515	NA	NA	NA	NA	NA	NA	NA	NA	NA	NA	NA	NA	NA	NA	NA	NA	NA	NA	0.3397	NA	NA	NA	NA	NA	NA	NA	0.2141	NA	NA	NA	NA	NA	NA	NA	0.2065	NA	NA	NA	NA	NA	NA	NA
MIMAT0018185	NA	0.1532	NA	0.3516	0.3674	NA	0.465597	1.2445	NA	NA	0.65426	NA	NA	0.3234	0.6202	NA	NA	NA	NA	NA	0.2972	NA	NA	NA	0.1814	NA	NA	NA	0.1823	NA	0.4745	NA	NA	NA	0.2185	NA	0.3161	NA	0.3057	NA	NA	NA	NA	0.1808	0.371899	NA	NA	0.1988	0.3976
MIMAT0018186	0.3514	1.08403	NA	NA	0.3674	1.27937	0.2515	NA	1.0613	1.40264	0.8196	0.4037	1.28315	1.17408	0.6202	1.46807	0.3711	0.743723	0.2505	0.2445	0.54351	0.5429	0.700015	0.4059	0.1814	0.8452	0.965691	0.78556	0.621847	0.969798	0.6034	1.3512	0.718139	0.847985	1.5665	0.4626	1.30439	0.769015	0.7723	0.866832	0.816	0.94359	0.670923	0.48603	0.912232	0.971698	0.931684	0.669999	1.18225
MIMAT0018187	1.25031	1.88286	2.00756	1.55176	2.33918	2.83139	2.66276	NA	1.96285	6.42047	1.63396	1.55444	2.15862	2.25386	2.07814	1.46801	2.26718	2.62557	2.20252	1.91457	1.24649	3.05503	2.42532	2.24381	3.66177	2.53076	1.53904	2.08984	2.54839	1.54452	2.47081	1.78149	2.54542	1.62292	2.85049	1.70855	1.88538	2.4174	1.84638	2.6201	1.38733	2.02771	2.23289	1.97728	1.54153	3.39431	2.00902	1.68539	2.16692
MIMAT0018180	NA	NA	2.3656	NA	NA	NA	NA	NA	NA	NA	0.2525	NA	NA	NA	NA	NA	NA	NA	NA	NA	1.37927	NA	NA	NA	NA	NA	NA	1.06052	NA	NA	NA	NA	NA	NA	NA	NA	NA	NA	NA	NA	NA	NA	NA	NA	NA	NA	NA	NA	NA
MIMAT0018181	NA	NA	NA	NA	NA	NA	NA	NA	NA	NA	NA	NA	NA	NA	NA	NA	NA	NA	NA	NA	0.2972	NA	NA	NA	NA	NA	NA	NA	NA	NA	NA	NA	NA	NA	NA	NA	NA	NA	NA	NA	NA	NA	NA	NA	NA	NA	NA	NA	NA
MIMAT0027438	NA	NA	NA	NA	NA	NA	NA	NA	NA	NA	NA	NA	NA	NA	NA	NA	NA	NA	NA	NA	NA	NA	NA	NA	NA	NA	NA	NA	NA	NA	NA	NA	NA	NA	NA	NA	NA	NA	NA	NA	NA	NA	NA	NA	NA	NA	NA	NA	NA
MIMAT0027439	NA	NA	NA	NA	0.3674	0.2677	NA	0.7525	NA	NA	0.2525	NA	0.442	NA	0.6202	0.1981	NA	NA	0.4639	0.636	0.7539	1.61171	NA	NA	0.1814	NA	NA	NA	0.3442	NA	NA	NA	0.4033	0.2141	NA	NA	0.3161	NA	NA	0.2701	0.131	NA	0.1992	NA	NA	NA	NA	NA	NA
MIMAT0026476	NA	NA	NA	NA	NA	NA	NA	0.7525	NA	NA	NA	NA	NA	NA	NA	NA	NA	NA	NA	NA	NA	NA	NA	NA	NA	NA	NA	NA	NA	NA	NA	NA	NA	NA	NA	NA	NA	0.555289	NA	NA	NA	NA	NA	NA	NA	NA	NA	NA	NA
MIMAT0000688	2.28125	1.42226	4.49333	2.76441	4.37297	3.22665	4.21109	NA	1.49137	4.1743	2.38051	2.69791	3.28133	5.07342	1.65464	4.96247	2.58195	4.29727	3.46594	3.32885	5.13289	4.46061	2.48016	3.99509	5.10833	3.80827	3.74282	4.28209	5.81683	0.96983	1.89769	2.38145	3.07344	3.4061	4.55832	3.53426	1.97804	2.96466	4.63424	4.85824	5.27922	3.01407	2.48257	3.88291	1.86626	3.7019	1.0418	3.6124	1.18225
MIMAT0000689	12.9492	14.4803	14.0565	14.395	15.4344	14.5221	14.4923	16.787	13.7109	14.3433	13.4278	15.5936	14.7293	14.3702	14.7134	12.7521	13.6381	14.4017	13.6289	15.7506	13.9246	15.14	14.3203	13.8869	14.4174	15.1245	13.3732	14.8949	14.8703	13.8063	14.1934	13.6633	14.3052	15.1686	15.0401	14.4701	14.0675	14.709	14.8009	16.04	14.8523	14.0327	15.5861	14.2961	13.6986	14.6463	13.8529	14.8595	13.9301
MIMAT0000682	9.37742	8.93099	10.7283	7.06608	9.10242	9.52745	7.68323	5.52942	8.95809	8.41909	4.34453	9.56561	9.07519	8.50739	7.30234	7.87787	8.94964	9.38289	8.23446	8.34545	7.29066	9.25012	8.41074	8.95796	7.7308	7.17619	8.45962	1.06049	8.83489	5.46052	7.4411	6.74941	8.04354	7.26652	8.65699	7.93579	7.44039	11.1164	9.7338	9.70664	8.18172	7.72347	9.31994	7.37066	7.33555	8.44946	6.8346	7.47475	9.69068
MIMAT0000683	NA	NA	NA	NA	NA	NA	NA	NA	NA	NA	NA	NA	NA	NA	NA	NA	NA	NA	0.649739	NA	NA	NA	NA	NA	NA	NA	NA	NA	NA	NA	NA	NA	NA	NA	NA	NA	NA	NA	NA	NA	NA	NA	NA	NA	NA	NA	NA	NA	NA
MIMAT0000680	7.63276	6.58459	8.74804	9.48424	9.29592	7.6775	8.24341	3.80822	7.85888	7.16383	7.77614	6.74878	7.85036	9.49789	7.57042	7.69418	8.5733	8.24292	8.11913	7.78983	8.4723	8.25843	7.52993	8.09847	8.29453	8.02155	7.21808	8.04288	8.66188	7.0619	8.05148	8.53818	8.43766	8.1996	9.63369	8.35432	7.77967	8.13077	8.93026	9.98748	7.74036	8.22946	7.40975	7.95271	7.78438	7.89134	7.88933	7.50674	8.65606
MIMAT0000681	10.8543	12.1321	12.0473	12.524	11.3994	12.3825	11.293	6.60789	11.1584	12.192	10.3044	10.699	12.6468	11.1197	11.2987	10.9044	10.0936	11.4809	11.3357	11.9111	11.763	12.051	10.1476	10.9271	11.6278	12.3371	10.1676	8.76329	10.6103	10.4523	12.0128	12.0578	11.1999	10.0083	10.2485	13.4576	10.6364	12.5602	9.53615	9.56044	9.29835	11.7324	11.7815	9.91639	12.7047	12.1549	13.4458	9.66	12.5785
MIMAT0000686	2.3609	4.60929	6.95971	3.33715	5.18508	4.96255	2.42768	NA	4.36205	4.66967	0.968044	7.45404	9.74114	2.76129	4.90711	3.319	2.2672	4.24692	2.20252	3.78039	5.81668	3.40534	1.16931	3.11021	4.6735	6.72609	3.65825	3.65306	4.86574	6.16016	4.92307	7.26175	6.72099	3.19543	4.64574	8.0159	3.10322	6.30658	4.0914	1.87845	3.61082	7.00633	2.99223	2.69472	1.80686	3.31295	7.53192	5.29541	1.37111
MIMAT0000687	0.869743	0.2916	1.0927	0.870137	NA	NA	0.465597	NA	NA	NA	NA	0.718783	NA	0.3234	NA	0.1981	0.9108	1.23204	1.21868	0.798006	0.54351	NA	NA	0.405938	1.05091	NA	0.465942	0.7856	0.1823	NA	0.1761	NA	1.38549	0.2141	NA	0.4626	0.985358	NA	0.959	0.2701	0.2511	0.38711	NA	1.30372	0.1979	0.1324	0.2032	0.529301	NA
MIMAT0000684	NA	NA	NA	NA	NA	NA	NA	NA	NA	NA	NA	NA	NA	NA	NA	NA	NA	NA	0.2505	NA	NA	NA	NA	NA	NA	NA	NA	NA	NA	NA	NA	NA	NA	NA	NA	NA	NA	NA	NA	NA	NA	NA	NA	NA	NA	NA	NA	NA	NA
MIMAT0000685	1.55115	2.51196	4.73751	NA	2.76553	2.34434	0.4656	NA	1.66616	1.79312	NA	4.17887	6.99343	1.0038	0.6202	1.74643	0.666009	2.26965	0.463872	1.59992	3.6631	1.09923	0.2728	0.981668	2.24838	4.7839	2.26651	1.0605	2.7056	1.54464	1.62159	3.59459	4.51922	1.18905	1.78758	6.41139	0.985358	4.38886	2.3917	0.694	1.58316	4.95447	0.3741	0.341444	0.527064	1.16951	4.18924	3.04276	NA
MIMAT0010367	NA	NA	NA	NA	NA	NA	NA	NA	NA	NA	NA	NA	NA	NA	NA	NA	NA	NA	NA	NA	NA	NA	NA	NA	NA	NA	NA	NA	NA	NA	NA	NA	NA	NA	1.48461	NA	NA	NA	NA	NA	NA	NA	NA	NA	NA	NA	NA	NA	NA
MIMAT0027502	NA	NA	NA	NA	NA	NA	NA	NA	NA	NA	NA	NA	NA	0.5875	NA	NA	NA	NA	NA	NA	NA	NA	NA	NA	NA	NA	NA	NA	NA	NA	NA	NA	0.4033	NA	NA	NA	NA	NA	NA	NA	NA	NA	NA	NA	NA	NA	NA	NA	NA
MIMAT0027503	NA	NA	NA	NA	NA	NA	NA	NA	NA	NA	NA	0.4037	NA	0.3234	NA	NA	NA	NA	NA	NA	0.2972	NA	NA	NA	0.1814	NA	NA	NA	NA	NA	NA	NA	NA	NA	NA	0.2498	NA	NA	NA	NA	NA	NA	NA	NA	NA	NA	NA	NA	NA
MIMAT0027500	NA	NA	NA	NA	NA	NA	NA	NA	NA	NA	NA	NA	NA	NA	NA	NA	NA	NA	NA	NA	NA	NA	NA	NA	NA	NA	NA	NA	NA	NA	NA	NA	NA	NA	NA	NA	NA	NA	NA	NA	NA	NA	NA	NA	NA	NA	NA	NA	0.3976
MIMAT0027501	NA	NA	NA	NA	NA	NA	NA	NA	NA	NA	NA	NA	0.1628	0.3234	NA	NA	NA	NA	NA	NA	0.54351	NA	0.2728	NA	NA	NA	NA	NA	NA	NA	NA	NA	NA	NA	NA	NA	NA	0.1601	NA	NA	NA	NA	NA	NA	NA	NA	NA	NA	NA
MIMAT0027506	NA	NA	NA	NA	NA	NA	NA	NA	NA	NA	NA	NA	NA	NA	NA	NA	NA	NA	NA	NA	NA	NA	NA	NA	NA	NA	NA	NA	NA	NA	NA	NA	NA	NA	NA	NA	NA	NA	NA	NA	0.131	NA	NA	NA	NA	0.2536	NA	NA	NA
MIMAT0027507	NA	0.1532	NA	0.3516	0.659972	0.2677	0.2515	2.14517	0.446	1.1589	0.4673	0.7187	0.3091	0.3234	0.6202	NA	0.3711	0.535746	NA	0.797865	0.753915	0.753091	NA	0.405938	0.48742	0.614462	0.4659	NA	0.621894	NA	0.333	NA	0.718139	NA	NA	0.648065	0.3161	0.769012	0.3057	0.2701	0.651065	0.38711	0.374203	0.3415	0.371899	0.365462	NA	0.1988	0.3976
MIMAT0027504	NA	NA	NA	NA	NA	NA	NA	NA	NA	0.2696	NA	NA	NA	NA	1.05254	NA	NA	NA	NA	NA	NA	NA	NA	NA	NA	NA	NA	NA	NA	NA	NA	NA	NA	0.2141	NA	NA	NA	NA	NA	NA	0.131	NA	NA	NA	NA	NA	0.2032	NA	NA
MIMAT0027505	0.3514	0.2916	NA	1.07301	0.3674	0.2677	0.651991	2.53428	0.446	0.692803	0.819679	0.977166	0.4419	NA	NA	0.1981	NA	NA	0.2505	0.2445	NA	1.09923	0.700015	0.2172	0.6191	0.614462	NA	NA	NA	0.146	0.603389	NA	0.7181	0.2141	0.2185	0.2498	0.575236	0.435195	NA	0.4976	0.131	NA	0.799193	0.341444	0.1979	0.365521	NA	0.1988	NA
MIMAT0000222	11.947	10.0671	12.57	8.52355	8.27138	9.01949	7.81354	12.6701	8.59695	8.92032	15.5669	12.8615	7.78227	8.37275	6.92262	8.61204	7.69104	7.55676	8.30795	9.03429	8.6197	9.43865	14.1705	8.23774	7.89327	8.93513	8.02444	7.83453	10.2703	7.31158	6.99659	7.92079	12.4757	6.86254	8.84981	7.69381	6.63268	15.0922	8.72588	8.53859	11.0221	7.50499	7.39207	7.38456	7.97005	8.61743	7.77443	8.76828	9.39269
MIMAT0027509	NA	NA	NA	NA	NA	NA	NA	NA	NA	NA	NA	NA	NA	NA	NA	NA	NA	NA	NA	NA	NA	NA	NA	NA	NA	NA	NA	NA	NA	NA	NA	NA	NA	NA	NA	NA	NA	NA	NA	NA	NA	NA	NA	NA	NA	NA	0.2032	NA	NA
MIMAT0000226	2.36085	1.08407	5.4485	2.57702	4.9345	4.99985	1.87431	4.79189	NA	5.73867	4.18681	4.67453	0.5635	4.54643	3.4861	2.55043	1.86409	1.08686	4.90746	9.70705	7.40416	3.66127	5.73469	7.23784	1.22637	5.60846	0.817507	8.61276	8.75205	0.712854	6.10626	2.38139	1.38546	2.97831	10.0918	3.33254	5.26598	0.955151	2.57428	3.35983	2.29202	1.05457	1.31045	1.64912	5.818	7.51971	3.14807	7.87421	10.3585
MIMAT0000227	7.86549	7.29058	8.13534	8.91687	8.82738	8.28535	8.94964	12.1106	6.56182	7.89551	9.20508	9.13805	7.53237	8.65409	8.54809	7.64195	8.37341	7.49696	7.87876	10.4324	8.2551	9.61204	7.91547	7.73245	8.90401	9.32378	7.61443	8.91487	9.08298	5.85762	7.41281	7.12871	8.83411	7.50756	9.67006	8.31208	8.26527	8.75578	8.62685	9.58546	7.97486	8.45812	7.38951	9.15258	7.33682	8.26483	7.04913	7.79958	7.11278
MIMAT0005788	NA	0.1532	0.4622	NA	NA	0.2677	NA	NA	NA	NA	NA	NA	0.1628	NA	NA	NA	0.3711	NA	NA	NA	2.53715	NA	NA	NA	1.22638	NA	NA	NA	NA	NA	0.1761	NA	NA	NA	NA	NA	NA	0.4352	0.3057	NA	NA	NA	NA	0.1808	NA	NA	NA	NA	NA
MIMAT0005789	NA	0.641526	NA	0.3516	NA	NA	1.09941	NA	0.446	NA	0.2525	NA	0.4419	0.3234	NA	0.1981	NA	0.2926	NA	NA	5.02558	NA	NA	0.857786	2.60673	0.845206	NA	NA	0.1823	NA	0.1761	0.2888	2.07903	NA	0.4081	NA	NA	0.1601	NA	0.2701	0.131	NA	0.1992	1.45197	NA	0.1324	0.2032	NA	NA
MIMAT0030430	NA	NA	NA	NA	NA	NA	NA	NA	NA	NA	NA	NA	NA	NA	NA	NA	NA	NA	NA	NA	NA	NA	NA	NA	NA	NA	NA	NA	NA	NA	NA	NA	NA	NA	NA	NA	NA	NA	NA	NA	0.131	NA	NA	NA	NA	NA	NA	NA	NA
MIMAT0030431	NA	NA	NA	NA	NA	NA	NA	NA	NA	NA	NA	NA	NA	NA	NA	NA	NA	NA	NA	NA	NA	NA	NA	NA	NA	NA	NA	NA	NA	NA	0.333	NA	NA	NA	NA	NA	NA	NA	NA	NA	NA	NA	NA	NA	NA	NA	NA	NA	NA
MIMAT0027593	NA	NA	NA	NA	NA	NA	NA	NA	NA	NA	NA	NA	NA	NA	NA	NA	NA	NA	NA	NA	NA	NA	NA	NA	NA	NA	NA	NA	NA	NA	NA	NA	NA	NA	NA	NA	NA	NA	NA	NA	NA	NA	NA	NA	NA	NA	NA	NA	NA
MIMAT0019039	NA	NA	NA	NA	NA	NA	NA	NA	NA	NA	NA	NA	NA	NA	NA	NA	NA	NA	NA	NA	NA	NA	NA	NA	NA	NA	NA	NA	NA	NA	NA	NA	NA	NA	NA	NA	NA	NA	NA	NA	NA	NA	NA	NA	NA	NA	NA	NA	NA
MIMAT0019038	NA	NA	NA	NA	NA	NA	NA	NA	NA	NA	NA	NA	NA	NA	NA	NA	NA	NA	NA	NA	NA	NA	NA	NA	NA	NA	NA	NA	NA	NA	NA	NA	NA	NA	NA	NA	NA	NA	NA	NA	0.131	NA	NA	NA	0.1979	NA	NA	NA	NA
MIMAT0019037	NA	0.1532	NA	NA	0.3674	0.2677	NA	NA	NA	0.865467	NA	NA	NA	NA	NA	NA	NA	NA	NA	NA	0.2972	NA	NA	NA	NA	0.3397	0.2517	3.73376	NA	NA	0.333024	0.2888	NA	NA	3.00538	NA	NA	NA	1.12432	0.497518	0.131	NA	NA	NA	NA	0.566136	NA	NA	NA
MIMAT0019036	NA	NA	NA	NA	NA	NA	NA	NA	NA	NA	NA	NA	NA	NA	NA	NA	NA	NA	NA	NA	NA	NA	NA	NA	NA	NA	NA	NA	NA	NA	NA	NA	NA	NA	NA	NA	NA	NA	NA	NA	NA	NA	NA	NA	NA	NA	NA	NA	NA
MIMAT0019034	NA	NA	NA	0.3516	NA	NA	NA	NA	NA	0.2696	NA	NA	NA	NA	NA	NA	NA	NA	NA	NA	0.2972	0.2969	NA	NA	NA	NA	NA	NA	NA	NA	NA	NA	NA	NA	0.2185	NA	NA	NA	NA	NA	NA	NA	NA	NA	0.1979	NA	NA	NA	0.3976
MIMAT0019033	NA	NA	NA	NA	NA	NA	NA	NA	NA	NA	NA	NA	NA	0.3234	NA	NA	NA	NA	NA	NA	NA	NA	NA	NA	NA	NA	NA	NA	NA	NA	NA	NA	NA	NA	NA	NA	NA	NA	NA	NA	NA	NA	NA	NA	NA	NA	NA	0.1988	NA
MIMAT0019032	NA	0.1532	NA	NA	NA	NA	NA	NA	NA	NA	NA	0.4037	NA	NA	NA	0.1981	NA	NA	NA	NA	NA	NA	NA	NA	NA	NA	NA	NA	NA	NA	NA	NA	NA	NA	0.2185	NA	NA	NA	NA	NA	NA	NA	NA	NA	NA	NA	NA	NA	NA
MIMAT0019031	NA	NA	NA	NA	NA	NA	NA	NA	NA	NA	NA	NA	NA	NA	NA	NA	NA	NA	NA	0.2445	NA	0.2969	NA	NA	NA	NA	NA	NA	NA	NA	NA	NA	NA	NA	NA	NA	NA	NA	NA	NA	NA	NA	NA	NA	NA	NA	NA	NA	NA
MIMAT0004945	3.74529	4.31667	4.44414	5.12683	4.90688	4.65917	5.04417	6.90844	6.28179	5.59273	4.88242	5.88543	4.64483	6.3955	6.17868	4.26712	4.38883	4.58092	4.34635	5.41102	4.20066	5.75495	5.1854	4.36849	4.78282	5.17167	4.13592	4.95587	5.54856	3.5686	5.27704	4.4187	5.53833	4.52869	5.45391	4.2732	5.19057	4.91181	5.5258	5.21085	4.02718	4.52382	5.07524	5.09225	4.80972	4.82246	4.80333	4.77876	4.32482
MIMAT0004763	NA	NA	NA	2.36153	NA	NA	NA	NA	NA	NA	NA	NA	NA	NA	NA	NA	NA	0.2926	NA	1.07592	1.99062	NA	NA	NA	NA	NA	NA	0.7856	NA	NA	NA	NA	NA	NA	0.575758	2.13831	0.3161	0.1601	NA	NA	1.33397	NA	NA	NA	NA	0.1324	NA	NA	NA
MIMAT0004946	2.87644	3.23267	2.36562	4.62821	4.57954	2.95034	4.8672	4.33413	3.04366	3.06987	4.96422	2.95979	2.96542	3.59189	2.40514	2.51365	3.05906	2.86697	2.37063	5.0257	3.134	5.83799	3.43081	3.08281	3.83433	5.1717	3.10827	4.41043	4.91809	0.803655	3.00174	1.68532	4.53933	4.24193	4.89593	3.12929	3.67333	3.78569	3.56745	5.68513	4.28809	3.68349	3.4486	3.2946	2.26958	4.33098	3.0195	3.71337	2.06121
MIMAT0026743	NA	NA	0.4622	NA	NA	NA	NA	NA	NA	0.4967	NA	NA	0.1628	NA	NA	NA	NA	0.535746	NA	NA	NA	NA	NA	NA	NA	NA	NA	NA	0.1823	NA	0.47452	0.5293	NA	NA	0.2185	NA	NA	NA	NA	NA	0.131	NA	NA	NA	0.1979	0.1324	NA	NA	NA
MIMAT0004764	NA	NA	NA	NA	NA	NA	NA	1.9025	NA	NA	NA	NA	NA	NA	NA	NA	NA	NA	NA	NA	NA	NA	NA	NA	NA	NA	NA	NA	NA	0.615911	NA	NA	NA	NA	NA	NA	NA	0.1601	NA	0.497518	0.464939	NA	NA	NA	NA	0.1324	NA	NA	NA
MIMAT0026741	NA	NA	NA	NA	NA	NA	NA	0.7525	0.7863	NA	1.10268	NA	0.675642	NA	NA	NA	NA	NA	NA	NA	NA	NA	NA	NA	NA	NA	NA	NA	0.344127	NA	NA	NA	NA	NA	NA	NA	NA	NA	NA	NA	1.90949	NA	NA	0.1808	NA	NA	NA	NA	NA
MIMAT0027619	NA	NA	NA	NA	NA	NA	NA	NA	NA	NA	NA	NA	NA	NA	NA	NA	NA	NA	NA	NA	NA	NA	NA	NA	NA	NA	NA	NA	NA	NA	NA	NA	NA	NA	NA	NA	NA	NA	NA	NA	NA	NA	NA	NA	NA	NA	NA	NA	NA
MIMAT0027616	NA	NA	0.4622	NA	0.3674	NA	NA	NA	NA	0.2696	NA	0.4037	NA	NA	0.6202	NA	NA	NA	NA	NA	NA	NA	NA	0.2172	0.1814	0.3397	NA	NA	NA	NA	0.333	NA	NA	NA	NA	NA	NA	NA	NA	NA	NA	NA	NA	NA	NA	NA	0.2032	NA	0.3976
MIMAT0004768	0.3514	1.00584	1.53011	NA	0.659972	1.01401	0.817036	NA	0.786192	0.496664	NA	NA	0.4419	0.587415	NA	1.02181	1.12	0.535746	0.814349	1.30868	0.54351	0.543004	0.2728	0.857854	0.954459	0.614462	1.10001	0.4456	0.742942	0.399983	NA	0.2888	0.4033	NA	NA	NA	NA	0.3042	0.772256	0.497518	0.560981	0.692002	0.530163	0.48603	0.1979	1.04066	NA	0.529306	NA
MIMAT0027614	NA	NA	NA	NA	NA	NA	NA	NA	NA	NA	NA	NA	NA	NA	NA	NA	NA	NA	NA	NA	NA	NA	NA	NA	NA	NA	NA	NA	NA	NA	NA	NA	0.4033	NA	NA	NA	NA	NA	NA	NA	NA	NA	NA	NA	NA	NA	NA	NA	NA
MIMAT0027615	NA	NA	NA	NA	NA	NA	NA	NA	NA	0.2696	NA	NA	NA	NA	NA	NA	NA	0.2926	NA	0.2445	NA	NA	NA	NA	NA	NA	NA	NA	NA	NA	NA	NA	NA	NA	NA	NA	NA	NA	NA	NA	0.131	NA	NA	NA	NA	NA	NA	NA	NA
MIMAT0004949	1.40861	0.923056	2.65223	0.634082	2.33912	0.493416	1.53827	4.28434	3.10567	1.51062	2.71065	2.18626	1.35232	2.86449	2.5445	1.6818	0.6661	1.3639	2.14183	2.33986	2.35553	2.4775	1.96872	0.857826	1.826	1.76108	1.63067	2.08983	2.37188	0.889097	1.02755	1.07593	1.55341	0.970837	3.1976	0.959881	1.97797	1.4648	2.18262	2.71368	3.43179	1.05463	2.48253	1.58631	0.794976	1.10653	1.04179	2.48044	3.25827
MIMAT0027613	NA	NA	NA	NA	NA	NA	NA	NA	NA	NA	0.2525	NA	NA	NA	NA	0.1981	NA	NA	NA	NA	NA	NA	NA	NA	NA	0.3397	0.2517	NA	0.1823	NA	NA	NA	NA	0.2141	NA	NA	NA	0.1601	NA	NA	0.131	NA	NA	NA	NA	NA	NA	NA	NA
MIMAT0027610	NA	NA	NA	NA	NA	0.493416	NA	NA	NA	NA	NA	NA	NA	NA	NA	NA	NA	NA	NA	0.453506	NA	NA	NA	NA	NA	NA	NA	NA	NA	NA	NA	NA	0.4033	NA	NA	NA	NA	0.1601	NA	NA	0.361955	0.2065	NA	NA	NA	NA	0.3813	NA	NA
MIMAT0027611	NA	0.1532	NA	0.634	0.3674	NA	NA	NA	NA	NA	NA	NA	0.563592	NA	NA	0.1981	NA	NA	0.2505	NA	0.2972	0.2969	0.2728	0.2172	NA	NA	NA	NA	NA	NA	NA	NA	NA	NA	0.2185	NA	NA	NA	NA	NA	0.362	NA	NA	NA	0.1979	0.1324	NA	NA	NA
MIMAT0004549	4.43859	7.34729	5.47327	6.8028	7.12236	6.06758	5.36404	5.08166	6.08025	6.72511	6.15737	5.59871	7.12395	5.49927	6.46849	4.98279	3.96983	5.42018	5.87856	6.91254	5.21517	7.38448	4.87332	4.72819	4.60362	7.14678	5.37169	3.69397	5.92954	4.207	7.0068	5.88409	6.16895	3.64628	4.88799	6.45871	5.58588	5.81133	4.8737	4.61322	5.58088	5.62849	6.05686	3.57874	7.13133	7.22755	7.89214	5.23444	7.3807
MIMAT0004548	0.869788	0.1532	0.4622	1.55164	NA	NA	0.2515	0.7525	NA	0.2696	NA	NA	0.309078	NA	NA	NA	NA	0.743723	NA	NA	0.2972	NA	0.2728	NA	0.1814	0.3397	0.2517	NA	NA	NA	NA	NA	0.976429	0.2141	NA	NA	0.3161	0.304195	NA	NA	1.27855	0.2065	0.1992	NA	NA	NA	NA	0.1988	NA
MIMAT0003236	NA	NA	NA	NA	NA	NA	NA	NA	NA	NA	NA	NA	NA	NA	NA	NA	NA	NA	0.2505	NA	NA	NA	NA	NA	NA	NA	NA	NA	NA	NA	NA	NA	NA	NA	NA	NA	NA	NA	NA	NA	NA	NA	NA	NA	NA	NA	NA	NA	NA
MIMAT0003237	NA	NA	0.4622	NA	NA	NA	NA	NA	NA	0.2696	NA	0.4037	NA	NA	NA	NA	NA	NA	NA	NA	NA	NA	NA	NA	NA	NA	NA	NA	NA	NA	NA	0.2888	0.4033	NA	NA	NA	NA	NA	NA	NA	0.131	NA	NA	NA	NA	0.1324	0.2032	0.1988	NA
MIMAT0003235	NA	0.2916	NA	NA	0.659972	0.493416	0.651991	NA	NA	0.2696	0.8197	NA	0.1628	1.32649	NA	0.527672	1.12	0.925476	NA	0.635936	0.7539	0.2969	0.700015	0.4059	0.4874	1.04405	0.4659	0.4456	0.742948	NA	0.333	NA	0.4033	0.2141	3.3672	0.462664	NA	0.3042	0.3057	0.2701	NA	0.5476	0.3741	1.04835	NA	0.566142	NA	NA	NA
MIMAT0004543	3.68474	1.64522	4.41889	1.40905	NA	1.69733	0.965088	7.46726	0.446	1.15885	6.8162	5.11175	0.967779	0.81058	1.3848	0.527631	0.6661	0.535746	1.53419	1.41241	0.937422	1.37815	4.92367	1.39203	1.22638	0.6145	0.817533	0.4456	2.08178	0.512009	1.3549	0.91568	4.39203	0.713681	1.30532	0.959898	0.794837	6.34877	1.40698	1.95709	2.20545	1.05462	0.91701	0.617363	0.912208	1.2299	1.64041	0.915762	1.94714
MIMAT0003239	6.18403	6.51031	6.98998	5.69408	6.57369	6.00942	7.43439	10.1377	6.8516	6.51101	8.46618	7.37768	5.97762	7.32942	6.80284	5.27921	7.0395	5.91008	5.658	8.94303	6.5422	7.71612	5.75709	6.04396	8.31165	6.922	6.36417	6.38383	7.25448	4.21532	6.03093	4.98102	6.78568	5.31768	6.79689	6.36912	6.72241	7.36988	7.91429	6.30832	5.41075	7.03199	7.10921	7.55196	5.68834	6.69146	6.60282	6.66296	5.68533
MIMAT0027641	NA	0.1532	NA	NA	NA	NA	0.2515	NA	NA	NA	NA	NA	NA	NA	NA	NA	NA	NA	NA	NA	NA	NA	NA	NA	NA	NA	NA	1.0605	0.1823	NA	NA	NA	NA	NA	NA	NA	NA	NA	NA	0.2701	0.131	NA	NA	NA	NA	NA	NA	NA	NA
MIMAT0004785	0.3514	0.291682	0.4622	0.3516	0.3674	NA	0.965126	NA	NA	NA	0.2525	NA	0.309078	0.3234	NA	0.667952	0.6661	0.535746	0.962085	1.07587	0.54351	0.2969	0.2728	0.2172	0.1814	0.614462	NA	0.4456	0.958215	NA	NA	NA	0.976429	0.400494	0.4081	0.462664	NA	0.4351	1.12432	0.2701	0.735891	0.38711	0.1992	0.1808	NA	0.365521	NA	0.1988	NA
MIMAT0004784	7.38391	7.66803	6.334	5.27811	8.8629	6.33507	8.36586	8.24286	5.79977	7.94572	8.56055	7.50108	6.25315	6.60742	5.0308	6.09331	6.71624	6.60332	6.7991	9.02204	7.48743	9.55712	7.71568	6.02248	7.61331	8.91781	7.84715	9.39524	7.9764	3.60693	5.56903	4.38852	7.28058	7.39142	7.89811	6.92153	6.13086	7.98807	6.87741	8.2504	6.10586	7.5172	7.18604	7.58847	5.54578	8.35569	6.43391	7.20827	6.07983
MIMAT0004780	4.34382	4.88557	5.85844	4.90559	6.85605	6.27557	5.25309	9.1285	3.47821	6.98819	7.89567	6.30616	5.72075	6.65859	4.90716	5.06754	4.79167	4.53969	4.68092	6.81656	4.81888	5.86084	5.12642	4.48824	5.16871	5.73607	5.23962	4.75782	6.59871	2.39523	3.84505	4.06473	5.42379	3.42772	4.6551	4.95677	3.36571	5.41476	5.07902	5.5834	3.55358	5.49702	4.92166	4.88621	3.91754	5.11828	3.88396	5.67921	3.59775
MIMAT0027643	NA	NA	NA	NA	NA	NA	NA	NA	NA	0.2696	NA	NA	NA	NA	NA	NA	NA	NA	NA	0.4534	NA	NA	NA	NA	NA	NA	NA	NA	NA	NA	NA	NA	NA	NA	NA	NA	NA	NA	0.3057	NA	NA	NA	NA	NA	NA	NA	NA	NA	NA
MIMAT0000414	9.181	7.72414	9.65879	8.43429	9.74281	9.68478	8.48495	8.95025	10.6673	9.18354	7.55049	9.05815	8.78448	9.08638	10.2943	9.26967	8.79054	9.06029	8.96329	9.00763	9.42005	9.87997	8.42128	9.18062	9.45999	9.01654	8.98958	9.79608	8.75072	10.4282	8.45306	10.6626	8.76094	9.79695	9.84951	8.87762	8.95292	9.78284	9.59716	9.44797	7.59334	8.8138	9.59312	9.02829	9.10255	9.41526	8.98003	8.50746	9.63246
MIMAT0011161	0.869788	0.291682	NA	0.3516	0.3674	0.2677	1.79733	3.0928	0.786192	0.4967	1.87873	1.38642	0.309078	0.587415	1.0526	0.795746	0.3711	0.743723	0.463872	1.6852	0.2972	1.49969	1.52274	0.2172	NA	1.51527	0.465942	0.4456	1.14555	NA	0.1761	0.735394	0.718139	1.0841	0.986171	1.32902	1.15368	0.4352	0.557813	1.02121	0.464897	0.38711	0.530163	0.48598	0.527064	0.899137	0.3813	0.529301	NA
MIMAT0011160	1.07254	NA	NA	NA	NA	NA	1.71602	0.7525	0.446	0.865467	0.819679	0.718783	NA	NA	NA	0.527631	0.3711	NA	0.2505	1.41242	NA	0.753091	0.5022	0.4059	0.487436	1.21881	0.4659	NA	0.621847	NA	NA	NA	0.718139	0.2141	0.575758	0.648065	NA	0.8651	0.3057	0.693993	NA	0.38711	0.1992	0.737782	NA	NA	NA	0.1988	NA
MIMAT0011163	NA	0.418028	NA	0.3516	0.3674	0.86047	NA	NA	0.446	NA	0.2525	0.7187	NA	0.3234	NA	0.372254	NA	NA	0.2505	0.2445	0.5436	0.2969	NA	0.2172	0.1814	NA	NA	NA	NA	NA	0.1761	NA	0.7181	0.2141	0.2185	NA	NA	NA	NA	0.2701	NA	NA	0.374203	0.1808	0.1979	0.566057	NA	0.1988	NA
MIMAT0011162	NA	NA	NA	NA	NA	NA	NA	NA	NA	NA	NA	NA	NA	NA	NA	NA	NA	NA	NA	NA	NA	NA	NA	NA	NA	NA	NA	NA	NA	NA	NA	NA	NA	NA	NA	NA	NA	NA	NA	NA	NA	NA	NA	NA	NA	NA	NA	NA	NA
MIMAT0022260	NA	NA	NA	NA	NA	NA	NA	NA	NA	NA	NA	NA	NA	NA	NA	NA	NA	NA	NA	NA	0.2972	NA	NA	NA	NA	NA	NA	NA	NA	NA	NA	NA	NA	NA	NA	NA	NA	NA	NA	NA	NA	NA	NA	NA	NA	NA	NA	NA	NA
MIMAT0022263	NA	NA	NA	NA	NA	0.2677	NA	NA	NA	NA	NA	NA	NA	NA	NA	NA	NA	NA	NA	0.2445	NA	NA	NA	NA	NA	0.3397	NA	NA	NA	NA	NA	NA	NA	NA	NA	NA	NA	NA	NA	NA	NA	NA	NA	0.3415	NA	NA	NA	NA	NA
MIMAT0022265	NA	NA	NA	NA	NA	NA	NA	NA	NA	NA	NA	NA	NA	NA	NA	NA	NA	NA	NA	NA	NA	NA	NA	NA	0.1814	NA	NA	NA	NA	NA	NA	NA	NA	NA	NA	NA	NA	NA	NA	NA	NA	NA	NA	NA	NA	NA	NA	NA	NA
MIMAT0003308	NA	NA	NA	NA	NA	NA	NA	NA	NA	NA	NA	NA	NA	NA	NA	NA	NA	NA	NA	NA	NA	NA	NA	NA	NA	NA	NA	NA	NA	NA	NA	NA	NA	NA	NA	NA	NA	NA	NA	NA	NA	NA	NA	NA	NA	NA	NA	NA	NA
MIMAT0003309	0.869788	0.923162	NA	NA	1.45426	0.2677	0.465597	1.61076	0.7863	1.01961	1.44432	0.4037	0.563481	0.3234	1.6546	NA	0.3711	0.535746	0.4639	0.797949	0.753837	0.936596	0.502128	0.2172	0.1814	0.845173	NA	NA	0.3442	NA	0.721685	0.2888	NA	0.970837	0.408219	0.648122	0.575236	0.769015	NA	1.51258	0.560981	0.547604	NA	NA	1.02091	0.656885	0.812514	0.669919	0.964942
MIMAT0025481	NA	NA	NA	NA	NA	NA	NA	NA	NA	NA	NA	NA	NA	NA	NA	NA	NA	0.2926	NA	NA	NA	NA	NA	NA	NA	NA	NA	NA	NA	NA	NA	NA	NA	NA	NA	NA	NA	NA	NA	NA	NA	NA	NA	NA	NA	NA	NA	NA	NA
MIMAT0025480	NA	NA	NA	NA	NA	NA	NA	NA	NA	NA	NA	NA	NA	NA	NA	NA	NA	NA	NA	NA	NA	NA	NA	0.2172	NA	NA	NA	NA	NA	NA	NA	NA	NA	NA	0.2185	NA	NA	NA	NA	NA	NA	NA	NA	NA	NA	NA	NA	NA	NA
MIMAT0025483	0.869743	0.1532	0.4622	NA	0.3674	NA	0.465597	NA	NA	NA	0.4673	0.4037	0.1628	NA	NA	NA	0.3711	0.2926	NA	0.2445	NA	NA	0.2728	NA	0.1814	NA	NA	NA	NA	0.146	0.1761	0.5293	NA	0.2141	NA	NA	NA	0.3042	NA	NA	NA	0.2065	0.1992	NA	NA	0.1324	0.5398	NA	NA
MIMAT0025482	NA	0.1532	NA	NA	NA	NA	NA	NA	NA	NA	NA	0.4037	NA	NA	0.6202	NA	NA	NA	0.2505	NA	0.2972	NA	NA	NA	NA	NA	NA	NA	NA	NA	0.1761	NA	NA	NA	NA	0.2498	0.3161	0.1601	NA	NA	NA	NA	0.1992	NA	NA	NA	NA	NA	0.3976
MIMAT0025485	0.3514	0.291682	NA	0.8701	NA	NA	NA	0.7525	NA	NA	0.2525	NA	0.1628	0.3234	0.6202	0.372254	NA	0.2926	0.2505	0.2445	0.2972	0.7531	NA	0.2172	0.1814	0.3397	NA	NA	0.344127	NA	0.1761	0.2888	NA	0.2141	0.408219	0.2498	0.3161	0.1601	0.3057	0.693993	0.362	NA	0.374203	NA	0.1979	0.5661	0.381281	0.1988	NA
MIMAT0025484	NA	0.641636	0.4622	0.3516	NA	NA	0.652	NA	0.446	NA	0.65426	0.7187	0.309078	0.3234	NA	0.667927	0.666009	NA	0.463872	0.63603	0.2972	0.5429	NA	0.405938	0.48742	0.3397	NA	NA	1.23089	0.278573	NA	0.2888	0.4033	0.970812	0.2185	0.2498	NA	0.1601	0.557813	0.2701	0.560981	NA	0.917003	0.1808	0.371899	0.656846	0.539776	0.1988	NA
MIMAT0025487	NA	NA	NA	0.3516	NA	NA	NA	NA	NA	NA	NA	NA	NA	NA	NA	NA	NA	NA	NA	NA	0.2972	NA	NA	0.2172	NA	NA	NA	NA	NA	NA	NA	NA	NA	NA	NA	NA	NA	0.1601	NA	NA	0.131	NA	NA	NA	NA	0.1324	0.2032	NA	NA
MIMAT0003301	3.58872	3.41035	2.73638	0.870137	4.92078	1.39576	2.97379	NA	1.49137	1.40262	2.66783	NA	1.81115	0.810507	NA	1.97975	2.26717	1.59617	3.13332	1.59991	NA	3.30893	2.24699	2.03093	2.24835	3.47096	1.94816	2.97739	4.60327	0.146	1.62156	0.2888	2.46342	1.69602	2.91444	1.6226	1.44074	2.50944	1.93808	2.35565	1.58319	1.91446	1.8141	1.58635	0.527064	2.85739	1.70872	2.27557	2.93809
MIMAT0016866	NA	NA	NA	NA	NA	NA	NA	NA	NA	NA	NA	NA	NA	NA	NA	NA	NA	NA	NA	NA	NA	NA	NA	NA	NA	NA	NA	NA	NA	NA	NA	NA	NA	NA	NA	NA	NA	NA	NA	NA	NA	NA	NA	NA	NA	0.1324	NA	NA	NA
MIMAT0016862	NA	NA	NA	NA	NA	NA	NA	NA	NA	NA	NA	NA	NA	NA	NA	NA	NA	NA	NA	NA	NA	NA	NA	NA	NA	NA	NA	NA	NA	NA	NA	NA	NA	NA	NA	NA	NA	NA	NA	NA	NA	NA	NA	NA	NA	NA	NA	NA	NA
MIMAT0018997	NA	NA	NA	NA	NA	NA	NA	NA	NA	0.2696	NA	0.4037	NA	NA	NA	NA	NA	NA	NA	NA	NA	0.2969	NA	NA	NA	NA	NA	NA	NA	NA	NA	NA	NA	0.2141	NA	0.462664	NA	0.1601	NA	NA	0.131	NA	NA	NA	NA	NA	0.2032	NA	NA
MIMAT0018996	NA	NA	NA	0.3516	NA	0.2677	0.2515	NA	NA	0.2696	0.2525	0.4037	0.1628	NA	0.6202	NA	NA	0.2926	NA	0.2445	NA	0.2969	NA	NA	0.1814	NA	0.4659	NA	0.1823	NA	0.1761	NA	NA	0.4006	1.10063	NA	0.3161	NA	NA	0.2701	NA	NA	0.1992	NA	NA	0.2536	0.2032	NA	NA
MIMAT0018994	NA	NA	NA	NA	NA	NA	NA	NA	NA	NA	NA	NA	NA	NA	NA	NA	NA	NA	NA	NA	NA	NA	NA	NA	NA	NA	NA	NA	NA	NA	NA	NA	NA	NA	NA	NA	NA	NA	NA	0.2701	NA	NA	NA	NA	NA	NA	NA	NA	NA
MIMAT0018993	NA	0.1532	0.4622	0.3516	NA	NA	0.465597	1.24453	0.446	NA	0.9681	NA	NA	0.81058	NA	NA	0.3711	NA	NA	0.636	NA	0.2969	0.502128	0.405938	0.6191	1.04405	0.465942	1.49024	0.1823	0.146	0.1761	NA	0.9764	0.2141	0.4081	0.6481	0.3161	0.95518	NA	1.16058	0.131	NA	0.3741	0.1808	0.1979	0.365462	NA	0.798105	0.709
MIMAT0018992	NA	NA	NA	NA	NA	NA	NA	NA	NA	NA	NA	NA	NA	NA	0.6202	NA	NA	NA	NA	NA	NA	NA	NA	NA	NA	NA	NA	NA	NA	NA	NA	0.2888	NA	NA	NA	NA	NA	NA	NA	NA	NA	NA	NA	NA	NA	NA	NA	NA	NA
MIMAT0018998	NA	NA	NA	NA	NA	NA	NA	NA	NA	NA	NA	NA	NA	NA	NA	NA	NA	NA	NA	NA	NA	NA	NA	NA	NA	NA	NA	NA	NA	NA	NA	NA	NA	NA	NA	NA	NA	NA	NA	NA	NA	NA	NA	NA	NA	NA	NA	NA	NA
MIMAT0015064	NA	NA	NA	NA	NA	NA	NA	NA	NA	NA	NA	NA	NA	NA	NA	NA	NA	NA	NA	NA	NA	NA	NA	NA	NA	NA	NA	NA	NA	NA	NA	NA	NA	NA	NA	NA	NA	NA	NA	NA	NA	NA	NA	NA	NA	NA	NA	NA	NA
MIMAT0015065	NA	NA	NA	NA	NA	NA	NA	NA	NA	NA	NA	NA	NA	NA	NA	NA	NA	NA	NA	NA	NA	NA	NA	NA	NA	NA	NA	NA	NA	NA	NA	NA	NA	NA	NA	NA	NA	NA	NA	NA	NA	NA	NA	NA	NA	NA	NA	NA	NA
MIMAT0015066	2.70397	4.53454	3.38406	1.91046	1.29274	4.59973	1.79732	0.7525	1.29229	3.10479	2.32657	4.4585	3.64045	2.65022	2.78837	1.61395	1.46472	1.97189	4.03207	2.11233	2.93258	2.84166	2.58397	4.78025	2.84055	2.46291	4.53029	1.49029	3.16162	1.95454	2.56879	2.49916	3.61914	2.07044	1.56655	1.43361	1.68018	3.91479	3.41619	2.46731	2.82453	2.02771	3.26087	1.92746	0.794949	5.17311	2.75436	1.47152	1.18227
MIMAT0015067	NA	NA	NA	NA	NA	NA	NA	NA	0.446	NA	0.968115	NA	NA	NA	NA	NA	NA	NA	NA	NA	0.2972	NA	NA	NA	NA	0.6145	NA	NA	0.344127	NA	0.932634	NA	NA	NA	NA	NA	NA	NA	NA	0.2701	0.651062	NA	NA	NA	0.912257	0.1324	0.2032	NA	1.1823
MIMAT0015060	NA	NA	NA	NA	NA	NA	NA	NA	NA	NA	NA	NA	NA	NA	NA	NA	NA	NA	NA	NA	NA	NA	NA	NA	NA	NA	NA	NA	NA	NA	NA	NA	NA	NA	NA	NA	NA	NA	NA	NA	NA	NA	NA	NA	NA	NA	0.2032	NA	NA
MIMAT0015061	NA	0.2916	NA	NA	NA	NA	NA	NA	NA	0.2696	NA	NA	NA	NA	NA	NA	NA	NA	NA	NA	NA	NA	NA	NA	NA	NA	NA	NA	0.1823	NA	NA	NA	NA	NA	NA	NA	NA	NA	0.5577	NA	NA	NA	0.1992	NA	0.1979	NA	NA	0.373494	NA
MIMAT0015062	NA	NA	NA	NA	NA	NA	NA	NA	NA	NA	NA	NA	NA	NA	NA	NA	NA	NA	NA	NA	NA	NA	NA	NA	NA	NA	NA	NA	NA	NA	NA	NA	NA	NA	NA	NA	NA	NA	NA	NA	NA	NA	NA	NA	NA	NA	NA	NA	NA
MIMAT0015063	NA	NA	0.4622	NA	NA	NA	NA	1.2445	NA	NA	NA	NA	0.1628	NA	NA	0.1981	NA	NA	0.2505	0.2445	NA	0.2969	NA	NA	0.3425	NA	NA	NA	NA	0.146	0.333024	0.2888	NA	NA	0.2185	NA	NA	NA	NA	0.497518	0.131	0.2065	NA	0.1808	NA	0.1324	NA	0.3735	NA
MIMAT0022862	0.3514	0.418028	NA	NA	0.3674	NA	0.965119	NA	NA	NA	NA	0.4037	0.1628	NA	NA	0.1981	0.666009	NA	NA	1.50912	0.54351	NA	0.2728	0.4059	0.619103	0.614462	0.465942	NA	0.489685	NA	NA	0.2888	NA	NA	0.2185	0.2498	0.575236	0.304195	0.3057	0.693993	NA	0.547604	0.1992	1.30376	NA	0.566109	NA	0.1988	NA
MIMAT0022861	0.869788	0.741561	0.811703	0.3516	1.11102	NA	1.22223	NA	NA	NA	NA	NA	0.1628	NA	NA	NA	1.11999	0.5357	0.814314	0.635936	0.54351	NA	NA	0.405938	0.739748	1.04405	NA	0.7856	0.742948	NA	0.1761	0.2888	NA	NA	0.575758	0.4626	0.3161	0.769012	1.12432	1.40451	0.131	0.692014	0.374203	0.737757	0.1979	0.469306	NA	0.1988	NA
MIMAT0015069	NA	NA	NA	NA	0.659972	0.2677	0.2515	NA	0.446	NA	0.65426	0.4037	NA	NA	0.6202	0.1981	0.3711	0.2926	0.649715	0.2445	0.753915	1.09922	0.2728	0.2172	0.739764	NA	0.465942	NA	0.8546	NA	0.333	NA	0.7181	0.2141	0.2185	0.2498	NA	NA	0.772354	NA	0.361955	NA	0.530163	NA	0.1979	0.566136	0.381281	NA	1.18225
MIMAT0022468	NA	1.48128	NA	0.3516	0.3674	0.688622	NA	NA	0.446	NA	0.4673	0.977166	0.44188	0.3234	0.6202	NA	0.3711	NA	0.463872	NA	NA	1.37813	NA	NA	0.342518	NA	1.10001	0.78556	0.742899	0.146	0.333024	0.735394	NA	0.713711	NA	0.2498	NA	0.1601	NA	0.2701	1.03253	NA	0.1992	0.341444	NA	0.2536	0.682591	NA	0.965
MIMAT0019832	NA	NA	NA	NA	NA	NA	NA	NA	NA	NA	NA	NA	NA	NA	NA	NA	NA	NA	NA	NA	NA	NA	NA	NA	NA	NA	NA	NA	NA	NA	NA	NA	NA	NA	NA	NA	NA	NA	NA	NA	NA	NA	NA	NA	NA	NA	NA	NA	NA
MIMAT0018445	NA	NA	NA	NA	NA	NA	NA	NA	NA	NA	NA	NA	NA	NA	NA	NA	NA	NA	NA	NA	NA	NA	0.2728	NA	NA	NA	NA	NA	NA	NA	NA	NA	NA	NA	NA	NA	NA	0.1601	NA	NA	NA	NA	NA	NA	NA	NA	NA	NA	NA
MIMAT0018116	NA	0.1532	NA	0.3516	NA	0.493416	NA	NA	NA	0.2696	0.819679	NA	0.1628	NA	NA	0.372254	NA	NA	NA	NA	0.2972	NA	0.2728	0.2172	NA	0.3397	NA	NA	0.1823	NA	NA	0.2888	NA	NA	NA	NA	0.3161	NA	0.3057	NA	NA	0.2065	NA	0.3415	NA	0.3655	NA	NA	0.3976
MIMAT0004487	0.633753	1.59264	1.09275	NA	1.29277	0.493416	1.22224	NA	1.0613	1.01961	NA	NA	1.28323	0.587415	NA	0.527672	NA	1.232	0.814349	1.07576	0.54351	0.9365	1.02911	0.572783	0.1814	1.21881	0.2517	NA	1.65783	0.146	0.603389	0.915699	0.976396	0.400494	1.71754	0.812412	1.30439	1.26796	0.958911	1.28775	NA	1.65729	0.916933	1.22357	0.6672	0.9716	1.04177	1.02453	1.1823
MIMAT0005868	NA	NA	NA	NA	NA	NA	NA	NA	NA	NA	NA	NA	NA	NA	NA	NA	NA	NA	NA	NA	NA	NA	NA	NA	NA	NA	NA	NA	NA	NA	NA	NA	NA	NA	NA	NA	NA	NA	NA	NA	NA	NA	NA	NA	NA	NA	NA	NA	NA
MIMAT0019078	0.3514	NA	NA	NA	NA	NA	NA	NA	NA	NA	NA	NA	0.309078	NA	NA	NA	NA	NA	NA	NA	NA	0.2969	NA	NA	NA	0.3397	NA	NA	NA	0.146	NA	0.9156	NA	0.2141	NA	NA	NA	NA	NA	NA	NA	0.2065	NA	NA	NA	0.1324	NA	NA	NA
MIMAT0018111	NA	NA	NA	NA	NA	NA	NA	NA	NA	NA	NA	NA	NA	NA	NA	NA	NA	NA	NA	NA	NA	NA	NA	NA	NA	NA	NA	NA	0.1823	NA	NA	NA	NA	NA	NA	NA	NA	NA	NA	NA	NA	NA	NA	NA	NA	NA	NA	NA	NA
MIMAT0018179	NA	NA	NA	NA	NA	NA	NA	NA	NA	NA	NA	NA	NA	NA	NA	NA	NA	NA	NA	NA	NA	NA	NA	NA	NA	NA	NA	NA	NA	NA	NA	NA	NA	NA	NA	NA	NA	NA	NA	NA	NA	NA	NA	0.1808	NA	NA	0.2032	NA	NA
MIMAT0006790	3.71534	4.43346	2.7364	2.36149	2.16348	1.15285	2.14661	3.80825	2.09106	0.2696	6.03648	3.46054	1.05337	1.81279	1.88193	0.1981	7.86815	3.47479	1.86978	5.22411	3.13403	6.16175	2.85703	3.3589	2.28849	4.14778	2.14749	6.19723	4.26205	NA	1.55934	0.5293	2.54539	2.45425	3.24809	2.46904	2.56047	3.20392	1.12431	12.2547	6.67715	2.95803	1.3941	2.60257	0.794902	3.48377	0.6826	1.92884	6.3165
MIMAT0019824	NA	NA	NA	NA	NA	NA	NA	NA	NA	NA	NA	NA	NA	NA	NA	NA	NA	NA	0.2505	NA	NA	NA	NA	NA	NA	NA	NA	NA	NA	NA	NA	NA	NA	NA	NA	NA	NA	NA	NA	NA	NA	NA	NA	0.341444	NA	NA	NA	NA	NA
MIMAT0019825	NA	NA	NA	NA	NA	NA	NA	0.7525	NA	NA	NA	NA	NA	NA	NA	NA	NA	NA	NA	NA	NA	NA	NA	NA	NA	NA	NA	NA	NA	NA	NA	NA	NA	NA	NA	NA	NA	NA	NA	NA	NA	NA	NA	NA	NA	NA	NA	NA	NA
MIMAT0019826	NA	NA	NA	NA	NA	NA	NA	NA	NA	NA	NA	NA	NA	NA	NA	NA	NA	NA	NA	NA	NA	NA	NA	NA	NA	NA	NA	NA	NA	NA	NA	NA	NA	NA	NA	NA	NA	NA	NA	NA	0.131	0.2065	NA	NA	NA	NA	NA	NA	NA
MIMAT0019827	NA	NA	NA	NA	NA	0.2677	0.2515	NA	NA	NA	NA	NA	NA	NA	NA	NA	NA	NA	0.2505	NA	NA	NA	0.2728	NA	NA	NA	NA	NA	NA	NA	NA	NA	NA	NA	NA	NA	NA	NA	NA	NA	0.131	NA	NA	NA	NA	NA	NA	NA	NA
MIMAT0019820	NA	NA	0.811703	0.3516	NA	NA	NA	NA	NA	NA	1.10271	NA	NA	NA	0.6202	NA	0.666009	NA	NA	0.2445	NA	0.543004	NA	NA	0.487436	NA	NA	NA	NA	NA	NA	NA	NA	NA	1.20659	NA	NA	NA	NA	NA	NA	NA	NA	NA	NA	0.1324	NA	0.3735	1.18225
MIMAT0019821	NA	NA	NA	NA	NA	NA	NA	NA	0.446	NA	NA	NA	NA	NA	0.6202	NA	NA	NA	NA	0.2445	NA	NA	NA	NA	NA	NA	NA	NA	NA	NA	NA	NA	0.7181	NA	NA	NA	NA	NA	NA	NA	NA	NA	NA	NA	NA	NA	NA	0.1988	0.708964
MIMAT0019822	NA	NA	NA	NA	NA	NA	0.651991	NA	NA	NA	0.4673	NA	0.1628	0.3234	NA	0.372254	NA	NA	NA	NA	0.2972	0.2969	NA	NA	0.1814	0.3397	0.2517	0.4456	0.1823	NA	NA	NA	0.4033	0.4006	0.2185	NA	NA	0.304195	NA	0.497518	NA	NA	0.1992	0.341444	NA	NA	NA	NA	NA
MIMAT0019823	NA	0.1532	NA	NA	NA	NA	0.4656	0.7525	NA	NA	0.2525	NA	NA	0.5875	NA	0.1981	0.3711	NA	NA	0.2445	NA	0.5429	0.5022	NA	0.1814	0.3397	NA	0.4456	0.1823	NA	0.1761	NA	0.4033	0.2141	0.575758	NA	NA	NA	0.3057	NA	0.131	NA	0.3741	NA	NA	0.1324	NA	NA	NA
MIMAT0019828	NA	NA	NA	NA	NA	NA	NA	NA	NA	NA	NA	NA	NA	NA	NA	NA	NA	NA	NA	NA	NA	NA	NA	NA	NA	NA	NA	NA	NA	NA	NA	NA	NA	NA	NA	NA	NA	NA	NA	NA	NA	NA	NA	NA	NA	NA	NA	NA	NA
MIMAT0019829	NA	NA	NA	NA	NA	NA	NA	NA	NA	NA	NA	NA	NA	NA	NA	NA	NA	NA	NA	0.2445	NA	NA	NA	NA	NA	NA	NA	NA	NA	NA	NA	NA	NA	NA	NA	0.2498	NA	NA	0.5577	NA	NA	NA	NA	NA	NA	NA	NA	NA	NA
MIMAT0017352	NA	0.741666	1.5301	0.3516	1.73118	0.2677	1.87426	0.7525	0.446	NA	1.54225	1.38637	0.44188	0.5875	0.6202	0.913218	0.6661	0.2926	0.962041	1.7658	0.753837	1.49966	0.7	0.9816	0.954491	2.15423	0.2517	1.66507	1.38766	NA	NA	NA	0.9764	0.565633	1.78757	1.2161	NA	1.63796	0.7723	1.7953	1.83455	0.547595	0.1992	1.04837	NA	1.44885	0.381281	1.47154	0.3976
MIMAT0020925	NA	0.64159	0.4622	1.55169	1.45422	0.493416	0.965119	0.7525	NA	1.1589	1.33912	2.08014	0.309078	1.00374	NA	0.372254	NA	0.743723	NA	0.63603	NA	0.7531	1.29701	0.5727	0.619103	1.51528	0.2517	0.7856	1.31135	0.146	0.603409	0.529319	NA	0.400494	1.71754	1.32897	NA	0.8651	1.74844	0.693993	0.651062	0.823275	NA	0.848912	0.912208	0.656885	1.41348	0.798105	2.44435
MIMAT0000078	11.3921	11.6183	10.9023	10.5146	11.4432	11.8479	12.3743	11.2841	11.5658	11.7183	10.7051	12.1635	11.6785	10.8347	11.457	11.139	12.3095	11.3955	10.5963	12.61	11.1528	11.7161	11.0397	11.3117	12.1611	11.8951	11.0405	11.215	11.7562	10.8969	11.3378	11.4497	11.3483	11.1433	11.1611	11.2643	12.1348	12.0879	11.9665	12.0411	10.1098	11.8262	11.8572	12.2229	11.5299	11.4052	11.3444	10.8518	11.7878
MIMAT0002858	NA	NA	NA	NA	0.3674	NA	NA	NA	NA	NA	1.33917	NA	NA	NA	0.6202	NA	NA	NA	NA	NA	NA	NA	0.2728	NA	NA	NA	NA	NA	0.1823	0.146	NA	NA	NA	NA	0.2185	NA	NA	NA	NA	NA	NA	1.58517	NA	NA	NA	NA	NA	NA	NA
MIMAT0001412	0.633753	0.2916	1.09283	0.3516	3.18899	0.493416	1.4404	NA	0.7863	1.5106	0.4673	0.4037	NA	NA	NA	0.1981	0.3711	0.743762	0.2505	0.798006	0.2972	0.2969	0.2728	0.572818	NA	1.3746	NA	0.4456	1.65784	0.278573	0.721668	1.58229	0.4033	NA	1.7176	0.648122	0.3161	1.26796	0.958996	2.92397	1.27856	0.2065	NA	0.48598	0.527	0.566109	0.539793	0.66991	1.53805
MIMAT0001413	4.22121	1.83832	4.49331	2.6422	8.02224	3.74833	4.71859	NA	2.0911	3.96242	3.88453	3.4176	2.96541	4.13644	3.17905	5.85365	5.99507	5.89374	4.11333	4.37562	5.68181	4.99287	5.18536	5.65951	2.66881	4.52579	4.49413	2.76341	6.77764	2.50758	1.99484	3.23591	4.82851	2.322	3.69318	2.60976	0.985331	3.72293	5.44999	7.9891	6.84036	2.4083	1.3941	2.80913	2.17885	5.35352	1.49311	5.32766	2.6769
MIMAT0019918	NA	NA	NA	NA	1.11102	0.493416	0.652	NA	0.446	NA	1.2257	0.4037	NA	NA	NA	0.5277	NA	0.2926	0.2505	0.943547	NA	1.0992	0.874005	NA	0.851107	0.8452	NA	1.06052	0.854577	NA	NA	NA	0.4033	0.8481	1.91808	NA	NA	0.1601	0.959	1.40451	0.816	0.2065	NA	0.1808	NA	0.3655	0.2032	0.373494	0.3976
MIMAT0019919	NA	NA	NA	NA	0.3674	NA	NA	NA	NA	NA	NA	0.4037	NA	NA	NA	0.1981	NA	NA	NA	NA	NA	NA	NA	NA	NA	NA	NA	NA	NA	NA	NA	NA	NA	NA	NA	NA	NA	NA	NA	NA	NA	NA	NA	NA	NA	NA	0.2032	0.1988	NA
MIMAT0019910	NA	0.1532	0.4622	0.634082	0.3674	NA	NA	NA	0.446	NA	NA	NA	NA	NA	NA	0.1981	NA	NA	NA	0.4534	0.2972	NA	NA	NA	NA	0.3397	NA	NA	NA	NA	0.474542	0.735394	NA	0.400494	0.4081	0.2498	NA	0.1601	NA	0.4976	NA	NA	0.1992	0.3415	0.1979	0.2536	0.2032	NA	NA
MIMAT0019911	NA	0.1532	0.4622	NA	NA	NA	NA	NA	0.446	NA	0.654242	NA	0.1628	0.3234	NA	NA	NA	0.2926	0.2505	0.2445	0.2972	NA	NA	NA	0.48742	0.845206	NA	NA	0.1823	0.146	0.1761	NA	NA	0.2141	0.575864	0.648122	NA	0.3042	NA	0.693993	NA	0.2065	NA	0.1808	0.371899	0.253664	0.2032	NA	NA
MIMAT0019912	0.3514	NA	NA	NA	NA	0.2677	0.465597	NA	NA	NA	NA	0.4037	NA	NA	NA	NA	NA	0.2926	0.463872	0.2445	0.54351	0.5429	0.2728	NA	0.1814	NA	NA	NA	0.6219	NA	NA	NA	NA	NA	NA	0.2498	NA	NA	0.3057	0.2701	NA	NA	0.1992	NA	NA	NA	NA	0.1988	NA
MIMAT0019913	NA	NA	NA	NA	NA	NA	NA	NA	NA	NA	NA	NA	NA	NA	NA	NA	NA	NA	NA	0.2445	NA	NA	NA	NA	NA	NA	NA	NA	NA	NA	NA	NA	NA	NA	NA	NA	NA	NA	NA	NA	NA	NA	NA	NA	NA	NA	NA	NA	NA
MIMAT0019914	NA	NA	NA	NA	NA	NA	NA	NA	NA	NA	NA	NA	NA	NA	NA	NA	NA	NA	NA	NA	NA	NA	NA	NA	NA	NA	NA	NA	NA	NA	NA	NA	NA	NA	NA	NA	NA	NA	NA	NA	NA	NA	NA	NA	NA	NA	NA	NA	NA
MIMAT0019915	NA	NA	NA	NA	NA	NA	NA	NA	NA	NA	NA	NA	NA	NA	NA	NA	NA	NA	NA	NA	NA	NA	NA	NA	NA	NA	NA	NA	NA	NA	NA	NA	NA	NA	NA	NA	NA	NA	NA	NA	NA	NA	0.1992	NA	NA	NA	0.2032	NA	NA
MIMAT0019916	NA	NA	NA	NA	NA	NA	NA	NA	NA	NA	NA	NA	NA	NA	NA	NA	NA	NA	NA	NA	NA	NA	NA	NA	NA	NA	NA	NA	NA	NA	NA	NA	NA	NA	NA	NA	NA	NA	NA	NA	0.131	NA	NA	NA	NA	NA	NA	NA	NA
MIMAT0019917	NA	NA	NA	NA	NA	NA	0.2515	NA	NA	NA	0.2525	NA	NA	NA	NA	NA	NA	0.2926	NA	0.2445	NA	NA	NA	0.2172	0.1814	0.6145	NA	0.4456	0.1823	NA	NA	NA	NA	NA	0.2185	NA	NA	NA	0.3057	NA	0.131	NA	0.3741	0.1808	NA	NA	NA	NA	NA
MIMAT0002859	0.3514	NA	NA	NA	NA	NA	NA	2.53428	NA	NA	2.83188	1.38642	NA	0.587415	NA	0.1981	NA	NA	NA	NA	NA	NA	NA	NA	0.1814	NA	NA	NA	0.1823	0.278573	NA	NA	NA	0.2141	NA	NA	NA	NA	NA	NA	0.651065	1.05463	NA	NA	NA	0.1324	NA	NA	NA
MIMAT0001631	7.28792	5.43748	10.1212	9.79103	6.35087	10.689	7.93188	5.7101	6.98133	6.43425	9.36097	8.98466	10.3191	8.93313	8.95489	8.72573	7.998	9.38582	9.73152	9.35176	12.7728	7.29711	6.89519	11.8791	8.75225	8.82121	8.81928	8.70567	10.36	9.78845	8.06973	12.3468	9.92108	7.98678	7.36609	10.6706	8.64924	9.11639	7.5931	6.16248	5.39459	9.62696	7.38824	9.68725	9.53063	8.83794	9.24279	6.76647	5.70299
MIMAT0001635	4.95705	7.02757	4.51733	5.09222	7.40013	7.02554	5.53373	2.53429	5.47493	7.07431	3.47712	4.67452	6.46898	3.6794	6.24147	6.6084	3.73571	5.10855	5.8409	6.60296	6.69018	6.24671	5.56111	5.76242	6.35621	6.60937	6.92643	6.97138	6.81091	6.71076	7.59045	5.55067	6.70327	4.06017	6.98176	5.07478	4.90229	6.03176	4.45957	3.69411	2.93625	6.06638	6.04076	5.3828	6.95966	4.39824	6.64703	8.32341	3.77544
[truncated: 672 more rows]
[truncated: 446 more columns]
