# Supplementary material for: Construction and validation of a novel prognostic signature of microRNAs in lung adenocarcinoma
Source: PeerJ. 2021 Jan 8;9:e10470. doi: 10.7717/peerj.10470 (PMC7798616; doi:10.7717/peerj.10470)
Supplement: Supplemental Information 9 [file peerj-09-10470-s009.xls]

## Sheet: Risk score
Table S2. Risk score of each lung cancer patient.
Patient_ID	hsa-mir-1468 expression	hsa-mir-299 expression	hsa-mir-4709 expression	hsa-mir-5571 expression	hsa-mir-582 expression	hsa-mir-3653 expression	Formula	RISK SCORE	Risk subclassification
TCGA.97.8171.01A	6.07493	0	4.57979	0	9.46807	2.8508	hsa-mir-582 expression * 0.166444721 - hsa-mir-1468 expression * 0.365783449 + hsa-mir-299 expression * 0.39442 - hsa-mir-4709 expression * 0.321897967 - hsa-mir-5571 expression * 0.57069069- hsa-mir-3653 expression * 0.143403717	-2.52924	Low-risk
TCGA.86.6851.01A	2.2879	0.542877	1.61162	2.14619	6.47119	4.30246		-1.90623	Low-risk
TCGA.86.8669.01A	2.92623	0.662168	3.42057	1.11431	7.24287	2.96261		-1.76551	Low-risk
TCGA.86.8671.01A	3.18198	0.794216	4.55542	0.574754	8.16032	3.32975		-1.7643	Low-risk
TCGA.44.2657.01A	2.12501	0	2.65151	1.76616	8.36633	3.26983		-1.71512	Low-risk
TCGA.55.8616.01A	4.45708	0.462297	1.7888	0.462297	6.26537	2.31214		-1.57636	Low-risk
TCGA.55.8206.01A	4.18499	0.314772	2.64202	0.573017	8.29881	2.46221		-1.55592	Low-risk
TCGA.55.1595.01A	0.694687	1.16161	2.23609	2.03304	7.4699	7.71893		-1.53957	Low-risk
TCGA.62.8397.01A	4.0523	0.692946	3.08526	0.769487	8.10804	1.55475		-1.51465	Low-risk
TCGA.64.5778.01A	2.91674	0.136537	1.95555	0.581415	6.32038	4.11922		-1.51305	Low-risk
TCGA.75.5147.01A	5.51852	0.693876	0.693876	0.579276	7.12255	2.658		-1.49451	Low-risk
TCGA.86.8076.01A	2.25202	1.6182	2.36172	2.25202	7.68199	3.70522		-1.48365	Low-risk
TCGA.05.4382.01A	5.06305	1.26902	0.769762	0.769762	6.94208	4.16348		-1.48012	Low-risk
TCGA.49.4501.01A	2.81861	0	3.98192	0	8.02616	3.33375		-1.45493	Low-risk
TCGA.50.8457.01A	3.1483	1.1146	2.88936	0.906127	7.37414	3.32645		-1.40881	Low-risk
TCGA.05.4402.01A	3.20305	0.542066	2.21675	1.24377	9.23709	3.63243		-1.36463	Low-risk
TCGA.67.3770.01A	2.08328	0.622571	3.74536	0	7.41312	5.96616		-1.3438	Low-risk
TCGA.50.5055.01A	2.62487	0.776412	2.35021	1.04914	7.53769	4.04482		-1.3346	Low-risk
TCGA.05.4427.01A	3.36738	0.842533	2.5747	0.481917	5.83087	1.75685		-1.28466	Low-risk
TCGA.95.8039.01A	2.79512	0.375229	3.82466	0	7.43536	2.85558		-1.27749	Low-risk
TCGA.55.A490.01A	4.67706	1.64115	1.64115	1.04234	7.59241	2.38909		-1.26551	Low-risk
TCGA.55.7907.01A	2.63006	1.23514	1.89068	1.23514	6.22052	3.42008		-1.24344	Low-risk
TCGA.55.A48X.01A	2.18733	1.04711	2.85212	1.04711	6.47824	2.62157		-1.20043	Low-risk
TCGA.55.6987.01A	3.61676	2.50282	1.47019	2.54322	9.97449	4.17489		-1.19893	Low-risk
TCGA.91.6840.01A	4.37538	1.15019	0.792157	0.406192	5.94023	3.72185		-1.17859	Low-risk
TCGA.44.7672.01A	1.11606	0.907398	2.17077	2.17077	6.9254	2.34665		-1.17177	Low-risk
TCGA.86.A4P8.01A	3.31797	0.313249	2.82019	0	7.74581	3.20869		-1.16881	Low-risk
TCGA.J2.A4AE.01A	3.77681	0.32669	2.01778	0	6.29482	2.10559		-1.15637	Low-risk
TCGA.44.5643.01A	3.13274	0.436404	2.18023	1.04242	9.16296	2.57172		-1.11416	Low-risk
TCGA.64.5779.01A	3.1011	1.41363	1.41363	1.30985	7.5152	4.06317		-1.11114	Low-risk
TCGA.55.8619.01A	3.2338	0.252268	2.08689	0.653732	8.3446	2.53031		-1.10216	Low-risk
TCGA.50.5066.01A	3.48128	1.29428	1.29428	1.37729	7.93166	3.16816		-1.09968	Low-risk
TCGA.99.8028.01A	2.89077	1.43889	2.71394	1.19114	8.08858	2.80506		-1.09921	Low-risk
TCGA.50.8460.01A	2.54547	0.374293	3.31974	0.374293	7.13049	1.52404		-1.09741	Low-risk
TCGA.50.5049.01A	3.43214	1.5099	1.19757	1.30936	7.23357	3.40723		-1.07724	Low-risk
TCGA.NJ.A55R.01A	4.27501	1.17475	1.32714	1.00434	8.38585	2.32887		-1.03894	Low-risk
TCGA.44.6776.01A	2.74631	0	2.94383	0	6.58648	1.12524		-1.01725	Low-risk
TCGA.05.5420.01A	2.0542	0.800671	2.11723	1.77028	8.46367	1.98828		-1.0038	Low-risk
TCGA.55.8087.01A	3.02472	0.460165	3.13166	0	7.69703	2.35971		-0.990233	Low-risk
TCGA.05.5425.01A	4.21584	1.32245	1.65267	1.05108	9.21137	2.56841		-0.98745	Low-risk
TCGA.55.8097.01A	2.88758	0.577565	1.57013	0.577565	6.94941	3.15011		-0.958501	Low-risk
TCGA.55.7725.01A	2.16841	0	2.37694	0.432456	7.19381	2.16841		-0.918688	Low-risk
TCGA.97.A4M1.01A	3.22661	0.688631	2.50846	0	6.9773	2.4558		-0.906933	Low-risk
TCGA.55.7911.01A	1.12974	0	2.89069	0.307591	5.74835	2.39985		-0.906652	Low-risk
TCGA.44.2661.01A	2.03839	0.427948	3.63175	0.757568	8.82014	1.25173		-0.889646	Low-risk
TCGA.44.6147.01A	2.80498	1.71478	1.76008	0.970889	6.06082	2.91864		-0.880069	Low-risk
TCGA.35.3615.01A	1.07557	1.41215	2.44102	1.07557	7.16867	5.6679		-0.855633	Low-risk
TCGA.55.A57B.01A	2.3739	0.959502	2.97863	0	5.95098	2.70772		-0.84649	Low-risk
TCGA.97.A4M2.01A	2.02402	0.749825	2.76416	0.749825	8.26065	3.19835		-0.846014	Low-risk
TCGA.55.8094.01A	5.33757	0	0.808313	0	9.30801	1.21072		-0.836943	Low-risk
TCGA.44.8117.01A	3.82722	1.47664	0.919528	0.236706	5.6136	3.59151		-0.82928	Low-risk
TCGA.L4.A4E6.01A	3.4099	0.938867	2.89125	0	8.29326	2.79922		-0.828714	Low-risk
TCGA.50.5942.01A	3.36039	2.05847	3.97239	0	8.16955	3.32828		-0.813488	Low-risk
TCGA.55.8096.01A	3.40632	2.86364	2.48968	1.07585	7.19307	3.30214		-0.808191	Low-risk
TCGA.78.8662.01A	4.27443	0.91414	0.734078	0	6.17388	2.75465		-0.806675	Low-risk
TCGA.97.8175.01A	2.9022	0.855557	3.62438	0	9.22752	3.14156		-0.805449	Low-risk
TCGA.50.8459.01A	2.22561	2.28729	2.914	1.01536	6.47978	3.16463		-0.804704	Low-risk
TCGA.49.AAR3.01A	2.27616	1.94153	1.50506	2.11852	8.39483	3.06238		-0.802185	Low-risk
TCGA.97.8552.01A	2.40636	0.779798	3.83415	0.162831	8.06503	1.65566		-0.794817	Low-risk
TCGA.50.5068.01A	3.15318	0.616849	1.59807	0.279066	7.44091	3.04543		-0.781985	Low-risk
TCGA.99.8025.01A	2.50897	0.954887	1.77108	0.740112	7.05292	2.9201		-0.778429	Low-risk
TCGA.55.8090.01A	2.07031	1.5459	4.24175	0.713657	9.71421	3.22024		-0.765153	Low-risk
TCGA.44.6148.01A	5.28115	3.60983	2.69871	0.291806	7.27723	2.92848		-0.751908	Low-risk
TCGA.69.8255.01A	1.80157	0.252452	1.63391	1.54216	9.03452	2.02137		-0.751586	Low-risk
TCGA.78.7539.01A	1.81753	0.275483	2.05519	0	4.42012	1.81753		-0.742664	Low-risk
TCGA.55.8512.01A	2.72093	1.01214	3.41422	0.225873	9.1688	2.95966		-0.722323	Low-risk
TCGA.05.4398.01A	2.17853	1.63976	2.38745	0.770096	6.74837	3.34625		-0.714748	Low-risk
TCGA.MP.A5C7.01A	1.99577	0.512883	1.99577	0.279113	6.77951	3.57118		-0.713157	Low-risk
TCGA.55.8204.01A	2.77948	1.43193	0.388179	1.91787	8.08047	2.57042		-0.695031	Low-risk
TCGA.75.5146.01A	2.85917	0.991162	2.40065	0.7299	8.53477	1.8616		-0.690606	Low-risk
TCGA.05.4417.01A	2.25127	1.58778	1.81038	1.32447	7.04037	2.17322		-0.675656	Low-risk
TCGA.67.3773.01A	2.06302	0	2.87916	0	8.39037	2.71426		-0.674115	Low-risk
TCGA.99.AA5R.01A	3.10095	0.944389	1.91576	0.244735	7.82367	3.16183		-0.669348	Low-risk
TCGA.55.8508.01A	2.9916	1.31617	0.803247	1.57857	8.21443	2.08013		-0.665639	Low-risk
TCGA.50.5941.01A	1.67403	1.19831	3.13229	0.845386	8.16406	2.69547		-0.658101	Low-risk
TCGA.93.A4JP.01A	2.18124	0	2.45934	0	7.63651	2.28002		-0.645424	Low-risk
TCGA.97.8172.01A	2.94278	1.47019	2.90538	0.478677	8.48805	2.41362		-0.63829	Low-risk
TCGA.67.3772.01A	1.57419	1.79581	2.89287	1.31223	7.4996	2.30899		-0.630447	Low-risk
TCGA.05.4422.01A	3.46984	0	1.65989	0	10.4481	3.87573		-0.620281	Low-risk
TCGA.49.6767.01A	3.87203	1.52042	0.951866	0	4.63923	1.85449		-0.616808	Low-risk
TCGA.05.4424.01A	1.94872	1.28105	2.49774	0.778273	5.95743	1.05145		-0.614908	Low-risk
TCGA.69.7765.01A	3.067	1.60885	1.40058	0.863965	7.14186	2.56565		-0.610394	Low-risk
TCGA.MP.A4SW.01A	0.554553	1.11888	2.87335	0.954143	6.32154	3.00553		-0.6098	Low-risk
TCGA.55.7727.01A	2.28739	1.02512	2.62659	0.828911	8.69984	2.1257		-0.607698	Low-risk
TCGA.44.6146.01A	2.13303	0.203167	1.32618	0	6.20143	3.54183		-0.602708	Low-risk
TCGA.55.6971.01A	1.59378	0.822859	3.05392	0.822859	9.40274	3.08693		-0.588714	Low-risk
TCGA.55.7573.01A	1.66237	0.722125	3.02604	0.519112	7.14278	1.20114		-0.576947	Low-risk
TCGA.05.4397.01A	1.7532	0.840244	2.70763	0.840244	9.36147	3.27708		-0.572761	Low-risk
TCGA.NJ.A55A.01A	2.92465	2.05817	2.97391	0.611107	9.16835	3.62524		-0.557901	Low-risk
TCGA.53.A4EZ.01A	2.70683	1.17413	1.32646	0.323442	5.97898	2.86449		-0.554197	Low-risk
TCGA.05.4389.01A	2.55086	1.25612	1.62423	1.25612	9.80943	3.51272		-0.548326	Low-risk
TCGA.78.7158.01A	2.93455	1.07555	3.24656	0	8.60637	1.98309		-0.54615	Low-risk
TCGA.91.A4BD.01A	1.70765	0.249574	2.13731	0	6.59337	2.89164		-0.531428	Low-risk
TCGA.55.1596.01A	2.30724	1.57273	0	1.57273	6.55167	3.44273		-0.524388	Low-risk
TCGA.67.3774.01A	1.37376	0.613987	2.39063	0.613987	8.4924	3.8868		-0.524131	Low-risk
TCGA.97.A4M6.01A	1.61144	1.0199	3.08544	0.371448	6.90072	1.92208		-0.519391	Low-risk
TCGA.49.AARQ.01A	2.41956	1.85202	0.903051	1.7312	8.17045	3.04442		-0.509886	Low-risk
TCGA.50.5932.01A	0.833134	0.554766	3.1272	0.108565	5.0463	1.35789		-0.509328	Low-risk
TCGA.97.7941.01A	2.47737	0.995104	2.06292	0.48263	8.69273	3.50202		-0.508519	Low-risk
TCGA.86.7953.01A	1.60686	0.29551	2.58521	0.29551	7.77628	2.28227		-0.504991	Low-risk
TCGA.44.3919.01A	1.78596	0.765164	2.27727	0	8.20538	5.47161		-0.503432	Low-risk
TCGA.55.8207.01A	2.02641	0	2.02641	0	6.96082	1.79041		-0.491684	Low-risk
TCGA.64.1681.01A	2.61632	0.227816	1.76335	0.227816	7.32425	0.891657		-0.473567	Low-risk
TCGA.44.2656.01A	1.85284	1.20543	2.1644	0	7.76401	5.99301		-0.466153	Low-risk
TCGA.55.7227.01A	1.19769	0.45379	3.00415	0.244664	7.1272	1.98443		-0.46406	Low-risk
TCGA.50.5946.01A	3.21312	1.90991	0.487678	0.983122	5.90012	2.11517		-0.46132	Low-risk
TCGA.86.8585.01A	2.53335	1.01141	1.3765	1.1117	8.86817	2.25498		-0.452581	Low-risk
TCGA.55.7283.01A	2.46473	0.516519	1.84117	0	6.32187	1.44467		-0.44543	Low-risk
TCGA.50.5944.01A	1.75816	1.20818	3.79352	0	6.77989	1.28072		-0.442884	Low-risk
TCGA.69.7763.01A	2.02725	0.943269	2.40784	0.386951	6.4143	0.943269		-0.433039	Low-risk
TCGA.50.6673.01A	1.63458	1.7028	2.33902	0.745538	6.98866	3.39884		-0.428861	Low-risk
TCGA.38.4625.01A	1.94401	0	1.27731	0	7.96681	4.38779		-0.425445	Low-risk
TCGA.55.1592.01A	1.64758	0	1.04722	0	8.62797	6.41374		-0.423428	Low-risk
TCGA.62.A46U.01A	2.03242	0.198099	1.38904	0	6.41262	2.62094		-0.420927	Low-risk
TCGA.55.8620.01A	1.85596	0.958412	0.87843	1.03419	5.75841	1.36286		-0.410813	Low-risk
TCGA.55.8510.01A	2.85906	1.51588	1.51588	0.591869	7.20701	2.33845		-0.409412	Low-risk
TCGA.55.8614.01A	3.44851	1.53055	0.704567	0.394874	6.16664	2.25639		-0.407048	Low-risk
TCGA.97.A4M0.01A	1.00819	0.194696	2.11207	0	4.72405	1.52521		-0.404284	Low-risk
TCGA.44.2655.01A	1.69437	2.63649	3.51555	0.457043	8.24273	5.56126		-0.397914	Low-risk
TCGA.97.A4LX.01A	2.58356	1.12108	2.17802	0	7.10747	2.58356		-0.391438	Low-risk
TCGA.NJ.A4YQ.01A	2.64097	1.2075	1.62994	0.607627	9.57466	4.349		-0.391212	Low-risk
TCGA.49.4514.01A	1.93052	1.85243	1.14085	1.76986	8.23397	2.81261		-0.385639	Low-risk
TCGA.86.7714.01A	1.94642	0.678864	2.74596	0.20191	8.03387	1.94642		-0.385286	Low-risk
TCGA.91.6835.01A	1.83141	0.478887	1.83141	0.478887	7.42337	1.90907		-0.382027	Low-risk
TCGA.J2.8194.01A	2.48276	1.2326	2.3362	0	7.42767	2.84991		-0.346401	Low-risk
TCGA.95.7947.01A	1.61473	0.826559	1.61473	1.02238	8.36508	2.56035		-0.34271	Low-risk
TCGA.05.4432.01A	2.52452	0	0.611834	0.611834	9.34816	2.97574		-0.340323	Low-risk
TCGA.97.8174.01A	1.76713	1.18433	3.62197	0.190802	8.81992	2.4659		-0.339649	Low-risk
TCGA.78.8655.01A	1.27894	0.860134	2.55857	0.493242	7.40725	2.3437		-0.336848	Low-risk
TCGA.91.8499.01A	3.06412	0.452257	0	0.243779	6.28106	2.04598		-0.3295	Low-risk
TCGA.38.4626.01A	2.40556	2.15014	4.37661	0	10.1297	3.96482		-0.323215	Low-risk
TCGA.05.4420.01A	4.4439	0.603226	0.603226	0	9.82884	2.6302		-0.322979	Low-risk
TCGA.44.A47G.01A	1.86896	1.00759	1.71094	0.463575	6.72924	2.33405		-0.316191	Low-risk
TCGA.MP.A4SV.01A	1.92406	1.35203	1.92406	0.390165	6.27414	2.41889		-0.315114	Low-risk
TCGA.86.8278.01A	1.59267	1.53808	3.01011	0.534078	7.64731	2.2987		-0.306454	Low-risk
TCGA.J2.A4AG.01A	1.39203	1.20137	3.1371	0.217166	7.03297	2.03087		-0.289731	Low-risk
TCGA.49.AAR0.01A	1.94382	1.15072	1.27716	0.687171	7.20786	2.98454		-0.288715	Low-risk
TCGA.55.6642.01A	2.39345	1.47122	0.437772	2.06716	8.70336	0.773172		-0.278082	Low-risk
TCGA.78.8660.01A	2.16669	1.64742	2.64036	0.472766	8.53952	3.03099		-0.27579	Low-risk
TCGA.80.5611.01A	0.62103	1.05377	2.99885	0.343676	6.8991	3.1376		-0.274617	Low-risk
TCGA.95.7562.01A	3.74178	1.84255	1.19737	0.943904	8.99062	1.41289		-0.272227	Low-risk
TCGA.05.4426.01A	1.84078	1.50808	3.06648	0	7.23962	2.86209		-0.27104	Low-risk
TCGA.49.AAQV.01A	2.0801	1.4325	0.887188	0.887188	6.6929	2.76066		-0.269644	Low-risk
TCGA.91.6828.01A	1.50183	0.938105	2.16377	0.450384	6.66644	1.67736		-0.263826	Low-risk
TCGA.73.4662.01A	0.850198	0.850198	2.32589	0.850198	9.07908	3.91151		-0.259312	Low-risk
TCGA.49.AAR2.01A	4.1738	1.2556	1.13055	0.673298	11.0262	2.12765		-0.249509	Low-risk
TCGA.35.4122.01A	1.82746	2.17153	2.53096	0.967844	8.53875	3.40042		-0.245411	Low-risk
TCGA.91.6829.01A	3.30342	1.78953	1.06489	0.348234	6.29772	1.67084		-0.235414	Low-risk
TCGA.67.3771.01A	0	0.682563	1.14403	0.682563	7.38169	6.78794		-0.23335	Low-risk
TCGA.55.6712.01A	2.0046	1.32561	1.70468	0.909752	7.59106	1.46333		-0.224679	Low-risk
TCGA.55.6970.01A	1.29849	0.87509	2.45507	1.10227	10.3944	2.81709		-0.223041	Low-risk
TCGA.69.7978.01A	2.14799	0.985935	1.30503	0.316318	7.18138	2.92961		-0.222247	Low-risk
TCGA.35.5375.01A	2.94926	0.814846	0.814846	0.283198	8.21878	2.70723		-0.201569	Low-risk
TCGA.05.4384.01A	1.60583	0.932301	1.80648	0.422899	7.25874	2.55636		-0.200928	Low-risk
TCGA.05.5715.01A	1.63356	1.52061	1.78795	0.159398	5.12424	2.69834		-0.198321	Low-risk
TCGA.86.8668.01A	2.30821	3.94933	4.22643	0.494568	6.69345	2.65894		-0.196549	Low-risk
TCGA.MP.A4T2.01A	3.00918	4.11757	1.42882	0.884503	4.65854	3.68322		-0.194167	Low-risk
TCGA.99.7458.01A	2.79632	1.45892	1.26256	0.608531	7.22561	1.36408		-0.19407	Low-risk
TCGA.44.4112.01A	2.29772	2.07198	2.74355	0	6.96478	2.95705		-0.171179	Low-risk
TCGA.73.7499.01A	2.19962	1.23119	0.991492	0.622031	6.92878	2.25498		-0.163242	Low-risk
TCGA.97.8177.01A	2.44702	2.51884	2.96689	0.63841	8.5239	2.44702		-0.153126	Low-risk
TCGA.05.4405.01A	1.84656	1.5594	2.25242	0.474528	7.11219	1.94713		-0.151681	Low-risk
TCGA.91.6830.01A	2.09322	1.66812	1.61212	0.682573	8.09663	3.34993		-0.148953	Low-risk
TCGA.MN.A4N5.01A	1.22283	0.652357	1.44106	0.251662	6.34738	2.82751		-0.146473	Low-risk
TCGA.38.A44F.01A	2.31894	1.47154	1.47154	0.529364	7.22617	2.1126		-0.143809	Low-risk
TCGA.78.8648.01A	2.79298	3.28117	2.04954	1.15121	7.36905	2.22126		-0.136191	High-risk
TCGA.49.AARO.01A	2.40828	1.72599	1.15767	1.05457	8.61806	2.70915		-0.128702	High-risk
TCGA.69.8453.01A	2.54645	1.96539	2.28498	0	6.91211	2.69767		-0.128164	High-risk
TCGA.86.8672.01A	2.19938	1.90203	1.34471	0.597661	5.53944	1.52705		-0.125209	High-risk
TCGA.44.6775.01A	1.84486	2.49897	2.04202	0.397555	5.61349	3.38908		-0.12505	High-risk
TCGA.35.4123.01A	3.05282	3.05282	2.8848	0	7.72614	3.8762		-0.111075	High-risk
TCGA.05.4433.01A	2.20686	0.746854	2.34164	0	8.75435	2.05818		-0.104463	High-risk
TCGA.97.A4M7.01A	2.18797	2.18797	2.05708	0.671538	7.10365	2.05708		-0.0953836	High-risk
TCGA.05.5423.01A	2.10373	0.974766	2.7976	0.111624	9.27522	2.02036		-0.095202	High-risk
TCGA.62.A472.01A	1.17242	0.876507	3.12636	0	6.87789	1.03203		-0.0927177	High-risk
TCGA.64.1680.01A	0.464648	0.464648	2.0143	0.464648	8.28283	3.87571		-0.0774224	High-risk
TCGA.69.7761.01A	1.74876	1.23203	0.743717	1.00843	6.24541	1.00843		-0.0737328	High-risk
TCGA.64.5774.01A	2.94293	0.574821	0.218055	0.574821	9.26976	2.51898		-0.0663204	High-risk
TCGA.55.6983.01A	2.33996	1.77221	1.27947	0.525297	8.28833	3.98404		-0.060342	High-risk
TCGA.86.A4P7.01A	2.13086	2.44548	2.53676	0.616969	7.67595	2.39758		-0.049764	High-risk
TCGA.50.6593.01A	2.45489	1.76615	2.07106	0.40075	6.99228	0.714037		-0.0352938	High-risk
TCGA.97.7554.01A	2.02535	2.21078	2.02535	1.26055	8.33364	1.26055		-0.0338832	High-risk
TCGA.50.5935.01A	1.41351	1.07672	1.97509	0.481457	7.25031	1.65041		-0.0328	High-risk
TCGA.MP.A4TA.01A	3.5201	2.44903	0.47287	0.977955	8.17779	2.49938		-0.0292447	High-risk
TCGA.MP.A4TJ.01A	1.84205	1.9425	1.9425	0.331726	8.00525	4.36789		-0.0161693	High-risk
TCGA.55.A4DG.01A	1.40165	1.31774	2.09898	0.376904	7.16099	2.24242		-0.013372	High-risk
TCGA.64.5815.01A	2.29232	2.33753	2.14751	0.39163	7.09286	2.50541		-0.0100191	High-risk
TCGA.86.8054.01A	3.5943	0.662706	0.979476	0.256226	9.90414	0.979476		-0.00683708	High-risk
TCGA.95.7043.01A	1.10771	0.854814	0.429226	0.157696	5.17445	3.85937		0.0116231	High-risk
TCGA.44.7671.01A	2.54407	1.52569	1.05231	0.343081	6.62528	1.52569		0.0206048	High-risk
TCGA.62.8399.01A	2.2732	2.08546	2.58823	0.372861	8.88079	2.78625		0.0237155	High-risk
TCGA.86.8075.01A	2.0146	2.0146	1.96439	0.757934	7.90256	1.96439		0.0264493	High-risk
TCGA.78.7167.01A	0.357179	0.643244	1.92948	0.357179	5.1519	0.881865		0.0291662	High-risk
TCGA.49.4486.01A	1.2752	0	1.94135	0	10.0975	3.88066		0.0328124	High-risk
TCGA.93.A4JQ.01A	1.90509	1.81416	1.71711	0.297223	7.30324	3.31067		0.0371571	High-risk
TCGA.95.A4VK.01A	1.84809	0.960168	0.773282	0	7.94328	5.1406		0.0387273	High-risk
TCGA.64.1676.01A	2.36269	2.76566	2.36269	0.500117	7.75513	3.00784		0.0401083	High-risk
TCGA.44.2666.01A	1.06784	1.67472	2.69631	0	7.91341	4.7123		0.0433923	High-risk
TCGA.97.7553.01A	2.20773	1.09962	2.08354	0	7.79427	1.44068		0.046193	High-risk
TCGA.91.6836.01A	2.34955	1.24218	1.67124	0.348357	8.63105	1.8996		0.0579212	High-risk
TCGA.55.8302.01A	1.1712	1.10276	2.04613	0.791046	9.32624	2.707		0.0605673	High-risk
TCGA.93.A4JO.01A	1.84736	1.56013	1.4501	0.282778	6.7104	2.52701		0.0659763	High-risk
TCGA.95.A4VP.01A	1.94688	2.2123	1.62136	0.721551	8.01477	3.42416		0.0697239	High-risk
TCGA.78.7153.01A	1.35824	1.11955	2.50872	0.47605	9.42762	2.50872		0.0749379	High-risk
TCGA.55.7903.01A	1.3958	0.860503	2.09176	0	7.42186	2.09176		0.0908678	High-risk
TCGA.69.7764.01A	1.38535	0.852941	2.73189	0	8.26939	1.59237		0.0983335	High-risk
TCGA.86.8279.01A	2.67733	2.02993	1.72809	0.32997	8.54943	2.73416		0.107661	High-risk
TCGA.L9.A743.01A	1.96233	1.71957	1.21894	0.681246	7.12109	1.7715		0.110519	High-risk
TCGA.MP.A4T7.01A	2.05225	0.5357	1.48469	0.5357	10.2414	1.88669		0.111049	High-risk
TCGA.95.A4VN.01A	1.94165	1.56909	2.02149	0	8.12199	3.43774		0.116818	High-risk
TCGA.05.4425.01A	2.41905	2.02272	2.85316	0	9.2509	2.85316		0.125135	High-risk
TCGA.78.7162.01A	2.54436	1.65453	2.25077	0	7.68382	1.05249		0.125379	High-risk
TCGA.93.A4JN.01A	1.08691	1.88676	1.36393	1.08691	7.24451	2.51641		0.132218	High-risk
TCGA.49.4494.01A	2.16272	0.58188	1.31637	0	9.38414	3.07929		0.135038	High-risk
TCGA.55.8092.01A	3.27876	1.69247	0	1.22605	9.99587	2.04437		0.139121	High-risk
TCGA.69.8253.01A	1.67126	1.49609	1.82744	0.241323	7.81232	2.80911		0.150281	High-risk
TCGA.55.A492.01A	2.05757	0.897314	0.65541	0	7.31938	3.08335		0.166425	High-risk
TCGA.93.7348.01A	1.94792	3.72081	2.46281	1.32441	6.81916	1.13976		0.17801	High-risk
TCGA.55.7576.01A	1.58994	0.826369	1.25809	0.207447	7.3147	1.79672		0.180835	High-risk
TCGA.78.7155.01A	0.727585	0	0.727585	0	5.51093	1.56929		0.191875	High-risk
TCGA.L4.A4E5.01A	3.1136	1.24308	0.348694	0	7.29819	1.79105		0.197051	High-risk
TCGA.NJ.A4YG.01A	1.52037	2.08372	2.24407	0	6.28749	2.72377		0.199296	High-risk
TCGA.53.7626.01A	2.00692	0.843611	1.37244	0.212765	7.80189	0.843611		0.213037	High-risk
TCGA.78.7163.01A	2.24342	2.87771	2.63906	0	5.93396	1.51984		0.234637	High-risk
TCGA.49.4512.01A	2.5053	2.75145	3.49322	0	8.79448	1.83397		0.245163	High-risk
TCGA.55.8505.01A	2.69079	2.18486	1.24133	0.628229	8.72755	2.26893		0.246682	High-risk
TCGA.50.7109.01A	1.46292	1.79049	0.233478	1.93004	9.4388	2.05728		0.270497	High-risk
TCGA.78.7159.01A	2.4617	1.38418	0.975366	0.402773	8.30508	1.38418		0.285511	High-risk
TCGA.73.4676.01A	2.93016	1.40898	1.2744	0	8.83258	1.64546		0.307869	High-risk
TCGA.55.5899.01A	1.28493	1.72191	0.896869	0.517034	5.96225	2.00614		0.330079	High-risk
TCGA.75.6214.01A	2.3598	2.3034	0.669415	0	7.10419	4.75376		0.330594	High-risk
TCGA.38.4627.01A	2.13531	3.48284	2.79458	0	7.04048	3.58836		0.350338	High-risk
TCGA.55.A48Z.01A	1.75821	2.08721	1.20145	0.282875	6.8955	2.98764		0.351216	High-risk
TCGA.67.6216.01A	1.91276	3.06593	3.16191	0.428313	8.73018	2.33133		0.366131	High-risk
TCGA.78.7540.01A	1.41501	0.777588	1.13122	0	6.91313	1.28008		0.392058	High-risk
TCGA.J2.A4AD.01A	1.9778	1.39656	1.64273	0	8.68521	2.4352		0.394986	High-risk
TCGA.62.A46V.01A	1.64384	2.39229	2.42834	0	6.67901	1.92182		0.396694	High-risk
TCGA.55.6984.01A	2.01842	1.52496	1.1201	0	8.28	3.36058		0.398855	High-risk
TCGA.62.A46S.01A	0.818163	1.0126	2.60591	0.326983	9.72029	2.01886		0.403058	High-risk
TCGA.78.7143.01A	1.87032	2.35946	2.44013	0.373094	8.38711	1.61631		0.412296	High-risk
TCGA.44.A4SS.01A	1.77489	1.94469	0.776011	0	4.98983	1.94469		0.419658	High-risk
TCGA.55.1594.01A	0	1.95756	1.5473	0	7.19144	7.30103		0.424009	High-risk
TCGA.44.7661.01A	2.13827	2.06684	1.73946	0.278158	7.31862	0.71188		0.430449	High-risk
TCGA.80.5608.01A	1.37924	1.12427	1.98177	0.325201	10.78	3.31232		0.434685	High-risk
TCGA.MN.A4N1.01A	2.45515	1.74839	0.772267	0	7.08226	1.84632		0.456993	High-risk
TCGA.NJ.A4YF.01A	2.39303	1.18636	0.278139	0	7.72309	2.27123		0.462825	High-risk
TCGA.55.8507.01A	2.29457	1.43205	1.33826	0	8.40858	1.6031		0.464403	High-risk
TCGA.MP.A4TI.01A	1.98997	1.66542	1.61247	0.156162	7.812	1.02068		0.474703	High-risk
TCGA.78.7537.01A	0.648429	2.13906	2.4698	0.648429	8.00838	2.043		0.481407	High-risk
TCGA.86.6562.01A	1.93163	1.57571	1.52435	0.143072	8.15845	1.52435		0.481932	High-risk
TCGA.38.4631.01A	2.92444	3.45285	0.996382	1.24374	9.12912	2.08192		0.482574	High-risk
TCGA.73.4658.01A	1.31781	2.81763	2.27799	0.394281	6.78418	2.18134		0.487383	High-risk
TCGA.75.6212.01A	3.28665	5.4479	3.56716	0	6.71106	2.66249		0.533508	High-risk
TCGA.49.4505.01A	1.57646	1.57646	1.37066	0	8.67305	3.54903		0.538572	High-risk
TCGA.55.6978.01A	1.87916	2.61683	1.47806	0.29068	7.84352	3.26211		0.540804	High-risk
TCGA.55.A48Y.01A	1.66731	1.29326	0.44647	0.786933	9.01031	1.66731		0.568021	High-risk
TCGA.86.8673.01A	3.1821	2.17646	0.271526	0.499954	8.90747	1.61863		0.57224	High-risk
TCGA.78.7535.01A	0.696923	1.61831	2.41881	0	7.18073	1.51759		0.582324	High-risk
TCGA.91.6831.01A	1.50353	1.65134	1.05007	0.819448	8.80262	1.15288		0.595512	High-risk
TCGA.78.7160.01A	2.51107	1.43789	0.513299	0	7.46454	0.891124		0.598039	High-risk
TCGA.MP.A4TE.01A	1.53274	0.463277	0	0.250155	7.99271	1.4351		0.603858	High-risk
TCGA.55.8091.01A	2.99369	3.08761	1.38257	0	8.02115	2.78524		0.613388	High-risk
TCGA.50.5044.01A	1.62039	2.74525	2.62911	0.332647	8.8848	2.21117		0.615667	High-risk
TCGA.MP.A4TC.01A	3.06069	3.12834	0.341468	0.486011	7.07885	1.97728		0.621738	High-risk
TCGA.69.7760.01A	1.8211	2.13027	0.883228	0.357832	6.70863	1.08814		0.646145	High-risk
TCGA.86.7701.01A	1.18123	2.05979	0.883728	1.18123	8.6878	1.53683		0.64741	High-risk
TCGA.MP.A4TD.01A	2.14755	2.61968	0.985657	0	6.62967	2.67608		0.650147	High-risk
TCGA.44.6144.01A	1.74246	2.9741	1.05852	0.624238	7.03469	2.46248		0.656461	High-risk
TCGA.86.7954.01A	1.12575	1.39256	1.30899	0	7.40098	1.98381		0.663483	High-risk
TCGA.78.7154.01A	1.16294	1.45143	1.89766	0	7.82193	1.16294		0.671383	High-risk
TCGA.50.6592.01A	2.35396	2.1709	1.04694	0.204524	8.09044	1.49962		0.673038	High-risk
TCGA.86.A4JF.01A	0.962058	2.56805	2.31672	0.463868	8.52766	2.61345		0.695118	High-risk
TCGA.NJ.A4YP.01A	1.40856	2.50802	1.40856	0.633734	7.8134	1.68091		0.718354	High-risk
TCGA.J2.8192.01A	2.34343	4.07999	3.13127	0	8.10329	2.59582		0.720593	High-risk
TCGA.44.7670.01A	1.41871	1.41871	0.416507	0	7.14538	2.58985		0.72447	High-risk
TCGA.MP.A4T8.01A	2.58192	1.86408	0.666072	0	8.70188	1.9759		0.741433	High-risk
TCGA.44.7669.01A	0.378716	0	0.678404	0	7.91557	1.486		0.747502	High-risk
TCGA.86.7955.01A	1.91738	0.324797	1.33052	0	12.5474	2.33337		0.75231	High-risk
TCGA.75.7027.01A	2.13104	2.44944	1.3146	0.745077	10.7662	2.61779		0.754807	High-risk
TCGA.64.1677.01A	0	1.68276	0	1.07396	8.50145	4.94676		0.756451	High-risk
TCGA.05.5429.01A	1.40307	1.40307	0.349484	0.242129	8.02354	2.54659		0.759786	High-risk
TCGA.50.5933.01A	1.62941	2.4871	0.877781	0	5.49093	1.72389		0.76912	High-risk
TCGA.78.7145.01A	1.40141	2.20524	2.04231	0	7.56321	1.30885		0.770927	High-risk
TCGA.50.5066.02A	2.70745	2.50605	0.888323	0	7.14816	0.888323		0.774533	High-risk
TCGA.86.7713.01A	0.889525	0.889525	1.27557	0.649273	10.5123	1.4357		0.788174	High-risk
TCGA.55.7570.01A	2.27776	2.02836	0	0.469809	8.05435	1.72664		0.79174	High-risk
TCGA.NJ.A7XG.01A	1.55057	1.49356	0.648419	0	6.82181	0.843526		0.827684	High-risk
TCGA.62.A46P.01A	1.30874	1.42669	1.63709	0	9.8373	2.49642		0.836395	High-risk
TCGA.99.8033.01A	1.53826	2.01689	1.53826	0.651987	10.7827	2.14665		0.852474	High-risk
TCGA.86.A4D0.01A	1.25706	1.45291	0.430306	0.430306	8.28232	1.77932		0.852548	High-risk
TCGA.44.A47F.01A	1.13548	0.676683	1.23053	0	10.1992	2.0503		0.859036	High-risk
TCGA.78.7161.01A	1.59402	1.0068	0.880653	0.224339	9.28928	0.5895		0.864142	High-risk
TCGA.44.7662.01A	1.62072	2.56199	0.249337	0.461867	5.65078	0.958514		0.876911	High-risk
TCGA.MP.A4SY.01A	1.93337	2.4162	0.723029	0	7.31778	2.35635		0.893157	High-risk
TCGA.91.7771.01A	2.4496	1.7348	1.23768	0.255837	11.6137	1.96732		0.894721	High-risk
TCGA.MP.A4T6.01A	1.12077	2.59314	1.66968	0	6.86563	2.2301		0.898304	High-risk
TCGA.05.4396.01A	1.97488	1.41945	0.957612	0	9.95005	1.97488		0.902155	High-risk
TCGA.49.4507.01A	0.886547	1.64241	0.886547	1.64241	13.9655	3.48349		0.925763	High-risk
TCGA.4B.A93V.01A	0.989943	1.21089	0.410018	0.728926	10.3197	2.39866		0.9412	High-risk
TCGA.86.8674.01A	1.01763	2.25	1.96459	0.227452	9.47621	2.61423		0.955388	High-risk
TCGA.05.4390.01A	1.27649	0.917666	0.775046	0	9.44896	1.64788		0.981958	High-risk
TCGA.97.8547.01A	1.74437	2.81641	1.42165	0	7.82323	2.17815		1.00494	High-risk
TCGA.97.8176.01A	1.38545	2.1851	1.70379	0	9.21376	2.28395		1.01268	High-risk
TCGA.L9.A5IP.01A	0.605254	1.20359	1.20359	0.605254	10.2034	1.35825		1.024	High-risk
TCGA.44.2668.01A	0.817967	3.7232	0.817967	0.817967	8.24373	5.23343		1.06083	High-risk
TCGA.50.5936.01A	2.45745	2.17944	1.5486	0.214678	11.5508	1.38098		1.06424	High-risk
TCGA.53.7624.01A	1.66127	0.946338	0	0	8.8489	1.1609		1.07197	High-risk
TCGA.78.7148.01A	1.52343	1.52343	1.22596	0	9.98226	1.65194		1.07359	High-risk
TCGA.44.7667.01A	1.96336	2.20934	0.446216	0.786534	10.5316	1.49176		1.09974	High-risk
TCGA.50.5931.01A	2.25114	1.71767	0	0	10.2917	2.88296		1.15362	High-risk
TCGA.50.6595.01A	1.93486	3.2071	1.12196	0	7.19845	1.5272		1.17519	High-risk
TCGA.55.6543.01A	1.87534	4.27691	1.98747	0.374669	8.54365	2.69733		1.18259	High-risk
TCGA.86.8074.01A	2.5769	5.59507	2.09062	0.551507	7.75772	2.5769		1.19821	High-risk
TCGA.78.7536.01A	1.01322	1.01322	0.421666	0.421666	9.93069	0.747555		1.19835	High-risk
TCGA.73.4659.01A	0	1.83111	2.14104	0	10.1486	3.37569		1.23812	High-risk
TCGA.78.7166.01A	0.60345	1.49452	1.02764	0	9.12076	1.49452		1.34172	High-risk
TCGA.44.6779.01A	1.26009	2.30825	1.39376	0.30161	10.4239	1.51609		1.34632	High-risk
TCGA.86.7711.01A	0.84856	1.87539	0.84856	0.341304	9.48064	1.22312		1.36398	High-risk
TCGA.78.7633.01A	0.236055	0.917499	0.616643	0	8.79151	1.04726		1.39016	High-risk
TCGA.62.A46O.01A	1.0089	1.0089	0.490518	0.490518	13.0806	2.50002		1.40975	High-risk
TCGA.38.4629.01A	2.33022	3.8888	0	0	7.66954	3.35173		1.47737	High-risk
TCGA.49.AAR9.01A	1.05113	2.30195	0	0	7.86605	2.30195		1.5026	High-risk
TCGA.NJ.A4YI.01A	1.22622	5.01397	1.32594	0	4.99137	2.7783		1.53463	High-risk
TCGA.78.7150.01A	1.67502	2.00566	0.349541	0	10.2171	1.54552		1.54481	High-risk
TCGA.55.7726.01A	1.39674	3.46865	0.627001	0	7.12169	1.39674		1.64044	High-risk
TCGA.50.5072.01A	1.59469	2.91952	2.01094	0	11.491	0.881106		1.70715	High-risk
TCGA.71.8520.01A	1.5368	5.86695	2.11357	0.397163	7.8253	2.21554		1.82966	High-risk
TCGA.05.4415.01A	0.557575	1.52966	1.27225	0	12.8972	1.93763		1.85865	High-risk
TCGA.78.7220.01A	0.595092	1.92908	0.820366	0	10.0314	0.595092		1.86345	High-risk
