# Supplementary material for: Construction and validation of a novel prognostic signature of microRNAs in lung adenocarcinoma
Source: PeerJ. 2021 Jan 8;9:e10470. doi: 10.7717/peerj.10470 (PMC7798616; doi:10.7717/peerj.10470)
Supplement: Supplemental Information 12 — 4 high-power fields (×200) on each slice were observed to count the score of staining cell number. The number of staining cells <5% is 0 score, 5%–25% is 1 score, 26%–50% is 2 scores, 51%–75% is 3 scores, 76% –100% is 4 scores. The score of staining intensity were also categorized as colorless (0 score), light yellow(1 score), brown (2 scores), tan (3 scores). Multiplying the two kind of scores is equal to the CEP55 positive grade. CA = cancer tissue; N = Non-cancerous tissue. IHC, immunohistochemistry. [file peerj-09-10470-s012.xls]

## Sheet: IHC score
Number	1 Score of staining cell number	1 Score of staining intensity	1 Positive grade	2 Score of staining cell number	2 Score of staining intensity	2 Positive grade	3 Score of staining cell number	3 Score of staining intensity	3 Positive grade	4 Score of staining cell number	4 Score of staining intensity	4 Positive grade	Average grade
CA1	3	2	6	3	3	9	3	3	9	3	3	9	8.25
CA2	3	2	6	3	2	6	4	2	8	4	2	8	7
CA3	4	3	12	4	3	12	4	3	12	3	2	6	10.5
CA4	4	1	4	4	3	12	4	2	8	4	1	4	7
CA5	4	3	12	3	2	6	4	3	12	4	2	8	9.5
CA9	4	2	8	3	2	6	4	2	8	4	3	12	8.5
CA10	4	3	12	4	3	12	4	2	8	4	3	12	11
CA12	4	3	12	4	3	12	4	3	12	4	3	12	12
CA13	4	1	4	4	2	8	4	2	8	4	2	8	7
CA15	4	2	8	4	2	8	4	2	8	4	2	8	8
CA16	4	3	12	4	2	8	4	2	8	4	2	8	9
CA18	4	2	8	4	2	8	4	1	4	4	2	8	7	8.72917
N1	3	2	6	4	2	8	3	2	6	3	2	6	6.5
N2	4	3	12	4	3	12	4	2	8	4	2	8	10
N3	4	2	8	4	1	4	4	3	12	3	2	6	7.5
N4	3	2	6	3	2	6	3	1	3	3	2	6	5.25
N5	3	1	3	4	1	4	4	1	4	3	1	3	3.5
N9	4	1	4	1	0	0	3	2	4	4	3	12	5
N10	2	1	2	3	3	9	3	2	6	2	1	2	4.75
N12	3	1	3	3	1	3	4	2	8	4	2	8	5.5
N13	4	2	8	4	2	8	4	2	8	4	2	8	8
N15	4	2	8	3	1	3	4	2	8	3	1	3	5.5
N16	4	1	4	4	1	4	4	1	4	3	1	3	3.75
N18	4	2	8	3	2	6	4	2	8	4	2	8	7.5	6.0625
